# Supplementary material for: Sex-Biased Transcriptome of Schistosoma mansoni: Host-Parasite Interaction, Genetic Determinants and Epigenetic Regulators Are Associated with Sexual Differentiation
Source: PLoS Negl Trop Dis. 2016 Sep 27;10(9):e0004930. doi: 10.1371/journal.pntd.0004930 (PMC5038963; doi:10.1371/journal.pntd.0004930)
Supplement: S3 Table — (XLSX) [file pntd.0004930.s006.xlsx]

## Sheet: Sheet1 - Male cercariae
Protein process
	pval	Test set	Control set
protein complex biogenesis	0.0175	1.85471	1.10165
protein homooligomerization	0.0139	0.618238	0.210315
protein complex assembly	0.016	1.85471	1.09164
protein binding	5.07e-28	26.8934	14.3215
protein localization	6.37e-06	4.17311	2.03305
establishment of protein localization	2.12e-05	3.55487	1.70255
protein transport	3.2e-05	3.47759	1.68252
cellular protein localization	8.65e-05	3.01391	1.44216
protein polymerization	0.000298	0.850077	0.190285
protein lipidation	0.000719	0.540958	0.0801202
protein-L-isoaspartate (D-aspartate) O-methyltransferase activity	0.00151	0.231839	0
protein carboxyl O-methyltransferase activity	0.00151	0.231839	0
peptidyl-tyrosine dephosphorylation	0.0023	1.00464	0.350526
protein tyrosine phosphatase activity	0.0023	1.00464	0.350526
protein dephosphorylation	0.00368	1.23648	0.520781
protein complex subunit organization	0.00824	2.31839	1.37206
cellular protein complex assembly	0.0111	0.850077	0.340511
Amino acid metabolism
	pval	Test set	Control set
aspartate family amino acid biosynthetic process	0.0126	0.231839	0.02003
aspartate family amino acid metabolic process	0.0126	0.231839	0.02003
asparagine biosynthetic process	0.0132	0.15456	0
asparagine metabolic process	0.0132	0.15456	0
aspartate-ammonia ligase activity	0.0132	0.15456	0
aromatic-L-amino-acid decarboxylase activity	0.0132	0.15456	0
serine-type peptidase activity	0.0153	0.772798	0.310466
serine hydrolase activity	0.0153	0.772798	0.310466
cellular amino acid biosynthetic process	0.0179	0.695518	0.270406
Transport
	pval	Test set	Control set
metal ion transport	1.88e-06	2.93663	1.1317
metal ion transmembrane transporter activity	4.1e-06	2.78207	1.08162
ion transport	4.65e-06	5.3323	2.83425
cation transport	7.56e-06	3.55487	1.62243
substrate-specific transporter activity	3.61e-05	5.7187	3.34502
cation transmembrane transporter activity	0.000119	3.55487	1.85278
inorganic cation transmembrane transporter activity	0.000178	3.01391	1.50225
ion transmembrane transporter activity	0.000234	4.86862	2.91437
substrate-specific transmembrane transporter activity	9.61e-05	5.25502	3.10466
ion transmembrane transport	0.000268	2.08655	0.901352
intracellular protein transport	0.000354	2.47295	1.18177
transition metal ion transport	0.00189	0.463679	0.0701052
potassium ion transport	0.0019	1.23648	0.480721
potassium ion transmembrane transporter activity	0.00356	1.08192	0.420631
anion transport	0.00674	0.927357	0.360541
anion transmembrane transporter activity	0.00887	0.772798	0.280421
divalent inorganic cation transmembrane transporter activity	0.00887	0.772798	0.280421
carboxylic acid transmembrane transporter activity	0.00911	0.463679	0.110165
organic acid transmembrane transporter activity	0.00911	0.463679	0.110165
amino acid transmembrane transporter activity	0.0115	0.386399	0.0801202
L-amino acid transmembrane transporter activity	0.0132	0.15456	0
secondary active transmembrane transporter activity	0.0154	0.850077	0.360541
monovalent inorganic cation transport	0.0157	1.70015	0.971457
drug transmembrane transport	0.000107	0.386399	0.010015
drug transport	0.000819	0.386399	0.0300451
organic substance transport	5.76e-05	4.40495	2.40361
General cellular process
	pval	Test set	Control set
Golgi apparatus	0.0158	1.39104	0.741112
cellular component organization or biogenesis	0.0176	6.80062	5.30796
cellular ion homeostasis	0.0192	0.540958	0.18027
cellular cation homeostasis	0.0192	0.540958	0.18027
membrane	1.51e-13	24.6522	16.1442
single-organism process	8.16e-12	35.1623	26.0691
single-organism cellular process	6.03e-10	30.9892	23.0846
cell periphery	5.04e-09	5.02318	2.08312
cell adhesion	3.11e-08	2.78207	0.841262
biological adhesion	3.11e-08	2.78207	0.841262
biological regulation	1.22e-07	18.4699	12.9995
cell communication	1.4e-06	11.4374	7.47121
regulation of biological process	1.42e-06	17.3879	12.5188
membrane part	1.52e-06	16.6924	11.9279
plasma membrane	1.07e-08	4.79134	1.98297
regulation of cellular process	9.8e-06	16.3833	12.028
calcium ion binding	1.18e-05	4.71406	2.47371
homophilic cell adhesion	1.39e-05	1.46832	0.390586
cell-cell adhesion	2.28e-05	1.62287	0.490736
cell projection organization	2.89e-05	2.00927	0.721082
extracellular region part	3.52e-05	1.1592	0.270406
plasma membrane part	4.48e-05	2.08655	0.791187
integral to membrane	4.81e-05	14.6059	10.8062
intrinsic to membrane	5.53e-05	14.6059	10.8363
cation channel activity	0.000143	2.00927	0.811217
integral to plasma membrane	0.000146	1.31376	0.400601
single-multicellular organism process	0.000158	7.95981	5.34802
endoplasmic reticulum lumen	0.000173	0.309119	0
integrin complex	0.000173	0.309119	0
intrinsic to plasma membrane	0.000185	1.31376	0.410616
membrane coat	0.000192	1.00464	0.250376
coated membrane	0.000192	1.00464	0.250376
cytoplasm	0.000233	12.442	9.25388
multicellular organismal process	0.00022	8.03709	5.4682
membrane lipid metabolic process	0.000272	0.695518	0.12018
cell part	0.000291	27.5889	23.1647
cell	0.0003	27.5889	23.1748
endoplasmic reticulum	0.000337	1.62287	0.620931
endoplasmic reticulum part	0.000342	1.08192	0.310466
metallopeptidase activity	0.000414	1.70015	0.681022
myosin complex	0.000425	0.540958	0.0701052
GPI anchor biosynthetic process	0.000425	0.540958	0.0701052
lysosome	0.000425	0.540958	0.0701052
clathrin adaptor complex	0.000425	0.540958	0.0701052
lytic vacuole	0.000425	0.540958	0.0701052
cell part morphogenesis	0.000433	1.46832	0.540811
cell projection morphogenesis	0.000433	1.46832	0.540811
vesicle coat	0.000445	0.618238	0.10015
extracellular matrix structural constituent	0.000624	0.463679	0.0500751
extracellular region	0.000625	1.46832	0.560841
potassium channel complex	0.000878	0.695518	0.150225
voltage-gated potassium channel complex	0.000878	0.695518	0.150225
cellular component morphogenesis	0.000902	1.77743	0.781172
ion channel complex	0.001	0.927357	0.270406
cell junction	0.00105	1.46832	0.590886
collagen	0.00113	0.463679	0.0600901
GPI anchor metabolic process	0.00115	0.540958	0.0901352
cell morphogenesis	0.00122	1.70015	0.751127
receptor complex	0.00167	0.386399	0.0400601
endomembrane system	0.0017	2.08655	1.04156
AP-type membrane coat adaptor complex	0.00177	0.540958	0.10015
cargo receptor activity	0.00214	0.309119	0.02003
cation channel complex	0.00219	0.850077	0.260391
regulation of cellular component organization	0.00204	1.77743	0.841262
system process	0.00268	1.93199	0.971457
extracellular matrix	0.00295	0.772798	0.230346
extracellular matrix part	0.00299	0.463679	0.0801202
proteinaceous extracellular matrix	0.00304	0.695518	0.190285
cation binding	0.00357	16.1515	13.33
single-organism biosynthetic process	0.00365	1.31376	0.570856
vacuole	0.00399	0.618238	0.16024
anatomical structure morphogenesis	0.00428	3.01391	1.83275
cellular component assembly	0.00429	2.93663	1.77266
metal ion binding	0.00444	15.9969	13.2599
regulation of biological quality	0.00453	3.24575	2.02303
ferric iron binding	0.00453	0.309119	0.0300451
substrate-specific channel activity	0.00465	2.85935	1.72258
ion channel activity	0.00465	2.85935	1.72258
multi-multicellular organism process	0.00503	0.386399	0.0600901
calcium ion transmembrane transport	0.00509	0.695518	0.210315
cellular component organization	0.00523	6.64606	4.88733
passive transmembrane transporter activity	0.00546	2.85935	1.74261
channel activity	0.00546	2.85935	1.74261
potassium channel activity	0.00582	1.00464	0.400601
cellular localization	0.0063	3.70943	2.44367
endoplasmic reticulum membrane	0.00642	0.850077	0.310466
nuclear outer membrane-endoplasmic reticulum membrane network	0.00642	0.850077	0.310466
coated vesicle membrane	0.00688	0.618238	0.18027
clathrin coat	0.00927	0.540958	0.150225
voltage-gated channel activity	0.00945	1.00464	0.430646
voltage-gated ion channel activity	0.00945	1.00464	0.430646
cytoplasmic vesicle membrane	0.01	0.695518	0.240361
cytoplasmic vesicle part	0.01	0.695518	0.240361
vesicle membrane	0.01	0.695518	0.240361
intracellular transport	0.0102	2.70479	1.70255
voltage-gated cation channel activity	0.0111	0.927357	0.390586
cellular homeostasis	0.0118	1.1592	0.550826
cellular metal ion homeostasis	0.012	0.540958	0.16024
voltage-gated potassium channel activity	0.0107	0.772798	0.290436
intracellular ligand-gated calcium channel activity	0.0126	0.231839	0.02003
ER to Golgi transport vesicle	0.0126	0.231839	0.02003
COPII vesicle coat	0.0126	0.231839	0.02003
ER to Golgi transport vesicle membrane	0.0126	0.231839	0.02003
endocardial cushion formation	0.0132	0.15456	0
endoplasmic reticulum-Golgi intermediate compartment	0.0132	0.15456	0
positive regulation of apoptotic process	0.0192	0.540958	0.18027
Cytoskeleton/Actin
	pval	Test set	Control set
actin filament	0.0132	0.15456	0
Arp2/3 protein complex	0.0126	0.231839	0.02003
microtubule	0.00947	1.31376	0.640961
actin filament organization	0.00509	0.695518	0.210315
structural constituent of cytoskeleton	0.00517	0.540958	0.130195
actin binding	0.00036	1.31376	0.440661
actin polymerization or depolymerization	0.0164	0.463679	0.130195
cytoskeleton	0.0173	6.1051	4.68703
actin cytoskeleton	4.02e-05	1.31376	0.350526
cytoskeletal protein binding	0.000249	2.39567	1.10165
Response to environemental stimulus
	pval	Test set	Control set
response to stimulus	6.27e-09	14.915	9.5343
response to chemical stimulus	6.41e-05	3.32303	1.63245
cellular response to stimulus	7.44e-05	11.7465	8.41262
response to vitamin	0.00151	0.231839	0
response to drug	0.0017	0.695518	0.170255
response to nutrient	0.00214	0.309119	0.02003
cellular response to alcohol	0.00551	0.231839	0.010015
ryanodine-sensitive calcium-release channel activity	0.00551	0.231839	0.010015
response to organic substance	0.00734	2.08655	1.18177
response to vitamin D	0.0132	0.15456	0
cellular response to epidermal growth factor stimulus	0.0132	0.15456	0
response to metal ion	0.0162	0.386399	0.0901352
response to inorganic substance	0.0164	0.463679	0.130195
regulation of response to alcohol	0.0132	0.15456	0
scavenger receptor activity	0.00214	0.309119	0.02003
receptor binding	0.00809	1.00464	0.420631
response to alcohol	0.00113	0.463679	0.0600901
General metabolism
	pval	Test set	Control set
hydrolase activity, acting on glycosyl bonds	1.8e-06	1.5456	0.360541
hydrolase activity, hydrolyzing O-glycosyl compounds	6.27e-06	1.31376	0.290436
O-methyltransferase activity	1.43e-05	0.463679	0.010015
glycolipid biosynthetic process	0.000425	0.540958	0.0701052
lipoprotein biosynthetic process	0.000719	0.540958	0.0801202
membrane lipid biosynthetic process	0.000719	0.540958	0.0801202
UDP-glycosyltransferase activity	0.000772	0.927357	0.260391
transferase activity, transferring hexosyl groups	0.000783	1.70015	0.721082
glycolipid metabolic process	0.00115	0.540958	0.0901352
acetylglucosaminyltransferase activity	0.00115	0.540958	0.0901352
lipoprotein metabolic process	0.00115	0.540958	0.0901352
carboxyl-O-methyltransferase activity	0.00151	0.231839	0
dihydropyrimidinase activity	0.00151	0.231839	0
aldehyde dehydrogenase [NAD(P)+] activity	0.00151	0.231839	0
glycogen biosynthetic process	0.00214	0.309119	0.02003
lipid biosynthetic process	0.00314	1.31376	0.560841
organic acid metabolic process	0.00314	2.47295	1.38207
oxoacid metabolic process	0.00314	2.47295	1.38207
transferase activity, transferring glycosyl groups	0.00235	2.24111	1.18177
oxidoreductase activity, acting on the aldehyde or oxo group of donors	0.00261	0.540958	0.110165
regulation of hydrolase activity	0.00286	1.62287	0.761142
glucan biosynthetic process	0.00214	0.309119	0.02003
oxidoreductase activity, acting on the aldehyde or oxo group of donors, NAD or NADP as acceptor	0.00451	0.463679	0.0901352
serine-type exopeptidase activity	0.00551	0.231839	0.010015
cellular lipid metabolic process	0.00447	1.85471	0.961442
exopeptidase activity	0.00528	0.850077	0.300451
metalloendopeptidase activity	0.00298	1.08192	0.410616
aminopeptidase activity	0.00299	0.463679	0.0801202
lipid metabolic process	0.00688	2.24111	1.29194
small molecule biosynthetic process	0.00762	1.23648	0.570856
phosphatidylinositol biosynthetic process	0.007	0.540958	0.14021
cellular amide metabolic process	0.007	0.540958	0.14021
phosphoprotein phosphatase activity	0.00872	1.23648	0.580871
disulfide oxidoreductase activity	0.00911	0.463679	0.110165
protein disulfide oxidoreductase activity	0.00911	0.463679	0.110165
glycerophospholipid biosynthetic process	0.01	0.695518	0.240361
oxidation-reduction process	0.0115	4.09583	2.8643
oxidoreductase activity, acting on the CH-NH2 group of donors	0.0115	0.386399	0.0801202
sphingomyelin phosphodiesterase activity	0.0126	0.231839	0.02003
beta-1,3-galactosyl-O-glycosyl-glycoprotein beta-1,6-N-acetylglucosaminyltransferase activity	0.0126	0.231839	0.02003
glycerolipid biosynthetic process	0.0123	0.695518	0.250376
regulation of GTPase activity	0.0161	1.08192	0.520781
oxidoreductase activity, acting on a sulfur group of donors	0.0192	0.540958	0.18027
ceramidase activity	0.0132	0.15456	0
enzyme activator activity	0.0152	1.1592	0.570856
positive regulation of hydrolase activity	0.0161	1.08192	0.520781
amide biosynthetic process	0.000819	0.386399	0.0300451
hydrolase activity, acting on carbon-nitrogen (but not peptide) bonds, in cyclic amides	0.0126	0.231839	0.02003
Development
	pval	Test set	Control set
cellular developmental process	1.03e-05	4.32767	2.18327
anatomical structure development	1.23e-05	6.1051	3.51527
system development	1.55e-05	5.10046	2.78418
photoreceptor cell development	0.0115	0.386399	0.0801202
cell differentiation	3.72e-05	3.94127	2.02303
single-organism developmental process	5.44e-05	5.56414	3.27491
developmental process	5.73e-05	7.95981	5.18778
cell development	6.47e-05	2.78207	1.26189
multicellular organismal development	0.000254	6.95518	4.5969
regulation of developmental process	0.00187	1.93199	0.941412
cell morphogenesis involved in differentiation	0.00586	1.1592	0.500751
embryonic development via the syncytial blastoderm	0.0126	0.231839	0.02003
regeneration	0.0126	0.231839	0.02003
organ regeneration	0.0132	0.15456	0
photoreceptor cell morphogenesis	0.0132	0.15456	0
regulation of cell differentiation	0.0147	1.46832	0.791187
cardiac epithelial to mesenchymal transition	0.0132	0.15456	0
epithelial to mesenchymal transition involved in endocardial cushion formation	0.0132	0.15456	0
cartilage morphogenesis	0.0132	0.15456	0
Macromolecules process
	pval	Test set	Control set
macromolecule localization	2.04e-05	4.55951	2.41362
cellular macromolecule localization	5.7e-05	3.09119	1.46219
Purine metabolism
	pval	Test set	Control set
guanosine-containing compound catabolic process	2.31e-05	3.01391	1.34201
GTP catabolic process	2.31e-05	3.01391	1.34201
GTP metabolic process	5.19e-05	3.01391	1.4021
guanosine-containing compound metabolic process	6.72e-05	3.01391	1.42213
GTP binding	0.000197	2.62751	1.24186
guanyl nucleotide binding	0.000224	2.62751	1.25188
guanyl ribonucleotide binding	0.000224	2.62751	1.25188
ATPase activity, coupled to transmembrane movement of ions, phosphorylative mechanism	0.000624	0.463679	0.0500751
regulation of nucleotide catabolic process	0.00904	1.1592	0.530796
regulation of nucleoside metabolic process	0.00904	1.1592	0.530796
regulation of purine nucleotide catabolic process	0.00904	1.1592	0.530796
regulation of cellular component size	0.0124	0.463679	0.12018
response to extracellular stimulus	0.0124	0.463679	0.12018
GDP-dissociation inhibitor activity	0.0126	0.231839	0.02003
regulation of purine nucleotide metabolic process	0.0172	1.1592	0.580871
regulation of GTP catabolic process	0.0182	1.08192	0.530796
GTPase activity	0.000365	1.93199	0.821232
Carbone metabolism/catabolism
	pval	Test set	Control set
carbohydrate metabolic process	2.92e-05	3.63215	1.78267
polysaccharide biosynthetic process	0.000819	0.386399	0.0300451
cellular carbohydrate biosynthetic process	0.000819	0.386399	0.0300451
cellular polysaccharide biosynthetic process	0.000819	0.386399	0.0300451
hexose metabolic process	0.00163	0.927357	0.290436
carboxylic acid metabolic process	0.00193	2.47295	1.332
monosaccharide metabolic process	0.00204	0.927357	0.300451
cellular carbohydrate metabolic process	0.00396	0.695518	0.2003
single-organism carbohydrate metabolic process	0.00452	2.08655	1.1317
organic acid biosynthetic process	0.00501	1.08192	0.440661
carboxylic acid biosynthetic process	0.00501	1.08192	0.440661
mannose metabolic process	0.00551	0.231839	0.010015
galactose metabolic process	0.00551	0.231839	0.010015
dicarboxylic acid metabolic process	0.00781	0.386399	0.0701052
polysaccharide metabolic process	0.0115	0.386399	0.0801202
cellular polysaccharide metabolic process	0.0115	0.386399	0.0801202
malate dehydrogenase (oxaloacetate-decarboxylating) activity	0.0132	0.15456	0
malic enzyme activity	0.0132	0.15456	0
Signal transduction
	pval	Test set	Control set
signal transduction	6.15e-05	10.0464	6.9304
integrin-mediated signaling pathway	0.000624	0.463679	0.0500751
protein tyrosine kinase activity	0.000891	1.08192	0.350526
small GTPase mediated signal transduction	0.00464	2.70479	1.6024
transmembrane receptor protein tyrosine kinase activity	0.00517	0.540958	0.130195
GTPase activator activity	0.00689	1.08192	0.460691
transmembrane receptor protein kinase activity	0.0111	0.618238	0.2003
Rab GDP-dissociation inhibitor activity	0.0132	0.15456	0
intracellular signal transduction	0.0141	4.40495	3.16475
single organism signaling	8.41e-06	10.8192	7.24086
signaling	8.41e-06	10.8192	7.24086
Energie
	pval	Test set	Control set
oxidoreductase activity, acting on the CH-NH2 group of donors, oxygen as acceptor	0.000784	0.309119	0.010015
hydrogen-exporting ATPase activity, phosphorylative mechanism	0.0132	0.15456	0
RNA process
	pval	Test set	Control set
regulation of mRNA processing	0.000819	0.386399	0.0300451
regulation of nuclear-transcribed mRNA poly(A) tail shortening	0.0132	0.15456	0
DNA replication, removal of RNA primer	0.0132	0.15456	0
regulation of mRNA 3'-end processing	0.0132	0.15456	0
Reproduction
	pval	Test set	Control set
multicellular organismal reproductive behavior	0.00167	0.386399	0.0400601
reproductive behavior	0.0115	0.386399	0.0801202
multicellular organism reproduction	0.0131	0.850077	0.350526
multicellular organismal reproductive process	0.0131	0.850077	0.350526
regulation of oocyte development	0.0132	0.15456	0
positive regulation of reproductive process	0.0132	0.15456	0
Neurological and brain process
	pval	Test set	Control set
regulation of synapse structure and activity	0.00151	0.231839	0
neurogenesis	0.00161	2.16383	1.09164
neuron projection morphogenesis	0.00168	1.08192	0.380571
neuron projection development	0.00036	1.31376	0.440661
neurological system process	0.00251	1.62287	0.751127
cell morphogenesis involved in neuron differentiation	0.0034	1.00464	0.370556
generation of neurons	0.00498	1.85471	0.971457
neuron differentiation	0.00632	1.70015	0.881322
regulation of synapse assembly	0.0132	0.15456	0
regulation of synapse organization	0.0132	0.15456	0
neuron development	0.000458	1.5456	0.590886
nervous system development	1.56e-05	3.40031	1.57236
Replication, transcription, traduction
	pval	Test set	Control set
DNA strand elongation involved in DNA replication	0.00551	0.231839	0.010015
DNA strand elongation	0.00551	0.231839	0.010015
DNA helicase activity	0.012	0.540958	0.16024
DNA-dependent DNA replication	0.0192	0.540958	0.18027
DNA repair
	pval	Test set	Control set
base-excision repair	0.00781	0.386399	0.0701052
Heme related
	pval	Test set	Control set
heme a biosynthetic process	0.0132	0.15456	0
heme a metabolic process	0.0132	0.15456	0
Behavior
	pval	Test set	Control set
behavior	0.00071	1.08192	0.340511
single-organism behavior	0.0179	0.695518	0.270406

## Sheet: Sheet2 - Female cercariae 
Neurological and brain process
	pval	Test set	Control set
positive regulation of neural precursor cell proliferation	4.87e-08	0.75543	0.00978474
regulation of neural precursor cell proliferation	4.87e-08	0.75543	0.00978474
neural precursor cell proliferation	7.51e-07	0.75543	0.0293542
positive regulation of neuroblast proliferation	4.36e-06	0.566572	0.00978474
forebrain generation of neurons	5.87e-06	0.661001	0.0293542
pituitary gland development	1.92e-06	0.661001	0.0195695
forebrain neuron differentiation	1.92e-06	0.661001	0.0195695
neuroblast proliferation	1.6e-05	0.566572	0.0195695
central nervous system neuron differentiation	3.54e-05	0.849858	0.107632
diencephalon development	6.51e-05	0.661001	0.0587084
cerebral cortex development	0.000318	0.472144	0.0293542
neuronal stem cell maintenance	0.000358	0.377715	0.00978474
forebrain regionalization	0.000826	0.283286	0
positive regulation of neurogenesis	0.00105	0.566572	0.0782779
forebrain development	0.00127	0.849858	0.205479
spinal cord development	0.00206	0.472144	0.0587084
neuron fate commitment	0.00326	0.472144	0.0684932
telencephalon development	0.00337	0.566572	0.107632
brain development	0.0156	1.03872	0.450098
regulation of neurogenesis	0.0194	0.75543	0.283757
forebrain dorsal/ventral pattern formation	0.00881	0.188857	0
regulation of nervous system development	0.0143	0.849858	0.322896
neuromuscular process controlling balance	0.0133	0.283286	0.0293542
brain morphogenesis	0.0133	0.283286	0.0293542
forebrain anterior/posterior pattern specification	0.00881	0.188857	0
cerebral cortex regionalization	0.00881	0.188857	0
forebrain morphogenesis	0.00714	0.283286	0.0195695
ventral spinal cord interneuron differentiation	0.00714	0.283286	0.0195695
negative regulation of neuron differentiation	0.00066	0.472144	0.0391389
somatic motor neuron fate commitment	0.00881	0.188857	0
commitment of neuronal cell to specific neuron type in forebrain	0.00881	0.188857	0
positive regulation of neuron differentiation	0.0102	0.377715	0.0587084
diencephalon morphogenesis	0.00714	0.283286	0.0195695
telencephalon regionalization	0.00881	0.188857	0
forebrain-midbrain boundary formation	0.00881	0.188857	0
rostrocaudal neural tube patterning	0.00881	0.188857	0
Development
	pval	Test set	Control set
positive regulation of epithelial cell differentiation	4.36e-06	0.566572	0.00978474
positive regulation of stem cell proliferation	4.36e-06	0.566572	0.00978474
regulation of stem cell proliferation	1.6e-05	0.566572	0.0195695
positive regulation of cell proliferation	1.68e-05	1.13314	0.195695
lens development in camera-type eye	3.27e-05	0.661001	0.0489237
ectodermal placode morphogenesis	0.000129	0.472144	0.0195695
ectodermal placode development	0.000129	0.472144	0.0195695
ectodermal placode formation	0.000129	0.472144	0.0195695
glial cell fate commitment	0.000129	0.472144	0.0195695
endocrine system development	0.000206	0.661001	0.0782779
regulation of ossification	0.000318	0.472144	0.0293542
regulation of osteoblast differentiation	0.000318	0.472144	0.0293542
olfactory placode formation	0.000358	0.377715	0.00978474
olfactory placode morphogenesis	0.000358	0.377715	0.00978474
olfactory placode development	0.000358	0.377715	0.00978474
adenohypophysis development	0.000358	0.377715	0.00978474
nose development	0.000358	0.377715	0.00978474
regulation of epithelial cell differentiation	0.00038	0.566572	0.0587084
stem cell proliferation	0.00038	0.566572	0.0587084
regulation of epithelial cell proliferation	0.000393	0.75543	0.127202
pallium development	0.000649	0.566572	0.0684932
osteoblast differentiation	0.00066	0.472144	0.0391389
epithelial cell proliferation	0.000798	0.75543	0.146771
regulation of cell proliferation	0.000899	1.322	0.440313
lens morphogenesis in camera-type eye	0.000993	0.377715	0.0195695
camera-type eye development	0.00209	0.944287	0.273973
positive regulation of endothelial cell migration	0.00307	0.283286	0.00978474
regulation of endothelial cell migration	0.00307	0.283286	0.00978474
negative regulation of osteoblast differentiation	0.00307	0.283286	0.00978474
lung alveolus development	0.00307	0.283286	0.00978474
ossification	0.00326	0.472144	0.0684932
formation of primary germ layer	0.00337	0.566572	0.107632
cell differentiation in spinal cord	0.00397	0.377715	0.0391389
endoderm formation	0.00397	0.377715	0.0391389
somatic stem cell maintenance	0.00397	0.377715	0.0391389
cell fate commitment involved in formation of primary germ layer	0.00397	0.377715	0.0391389
camera-type eye morphogenesis	0.00225	0.661001	0.136986
visual perception	0.00397	0.377715	0.0391389
gland development	0.0042	0.75543	0.205479
positive regulation of cell development	0.00466	0.566572	0.117417
glial cell differentiation	0.00489	0.472144	0.0782779
negative regulation of epithelial cell proliferation	0.00489	0.472144	0.0782779
cell proliferation	0.00517	1.51086	0.675147
retina development in camera-type eye	0.00628	0.566572	0.127202
retina morphogenesis in camera-type eye	0.00703	0.472144	0.0880626
gliogenesis	0.00703	0.472144	0.0880626
lens induction in camera-type eye	0.00714	0.283286	0.0195695
embryonic eye morphogenesis	0.00714	0.283286	0.0195695
developmental induction	0.00714	0.283286	0.0195695
endodermal cell fate specification	0.00714	0.283286	0.0195695
response to retinoic acid	0.00714	0.283286	0.0195695
embryonic camera-type eye morphogenesis	0.00714	0.283286	0.0195695
epithelial tube branching involved in lung morphogenesis	0.00714	0.283286	0.0195695
blood vessel development	0.00801	0.75543	0.234834
positive regulation of cell fate specification	0.00881	0.188857	0
cornea development in camera-type eye	0.00881	0.188857	0
dorsal/ventral axis specification	0.00881	0.188857	0
pancreatic A cell development	0.00881	0.188857	0
pancreatic A cell differentiation	0.00881	0.188857	0
regulation of timing of cell differentiation	0.00881	0.188857	0
regulation of blood vessel endothelial cell migration	0.00881	0.188857	0
glial cell fate specification	0.00881	0.188857	0
oligodendrocyte cell fate commitment	0.00881	0.188857	0
oligodendrocyte cell fate specification	0.00881	0.188857	0
vasculature development	0.00972	0.75543	0.244618
regulation of cell migration	0.00974	0.472144	0.0978474
stem cell maintenance	0.00974	0.472144	0.0978474
negative regulation of cell proliferation	0.0105	0.661001	0.195695
positive regulation of blood vessel endothelial cell migration	0.00881	0.188857	0
regulation of endothelial cell proliferation	0.0133	0.283286	0.0293542
endothelial cell proliferation	0.0133	0.283286	0.0293542
endodermal cell fate commitment	0.0133	0.283286	0.0293542
embryonic camera-type eye development	0.0133	0.283286	0.0293542
positive regulation of epithelial cell migration	0.0133	0.283286	0.0293542
regulation of epithelial cell migration	0.0133	0.283286	0.0293542
endothelial cell migration	0.0133	0.283286	0.0293542
lung morphogenesis	0.0133	0.283286	0.0293542
eye morphogenesis	0.0139	0.75543	0.264188
endoderm development	0.0149	0.377715	0.0684932
regulation of cell differentiation	0.0198	1.51086	0.802348
positive regulation of cell differentiation	0.00258	0.944287	0.283757
positive regulation of endothelial cell proliferation	0.00307	0.283286	0.00978474
Sexual differentiation
	pval	Test set	Control set
development of primary female sexual characteristics	0.0133	0.283286	0.0293542
male sex differentiation	0.000318	0.472144	0.0293542
development of primary male sexual characteristics	0.000318	0.472144	0.0293542
development of primary sexual characteristics	0.00105	0.566572	0.0782779
genitalia development	0.00703	0.472144	0.0880626
male genitalia development	0.000993	0.377715	0.0195695
Carbone metabolism/catabolism
	pval	Test set	Control set
organic substance metabolic process	0.00472	58.0737	53.8552
Heterocycle molecules
	pval	Test set	Control set
organic cyclic compound metabolic process	1.13e-05	46.4589	39.6575
cellular aromatic compound metabolic process	1.33e-05	46.2701	39.5303
heterocycle metabolic process	0.000343	43.0595	37.6517
Response to environemental stimulus
	pval	Test set	Control set
detection of abiotic stimulus	0.000102	0.566572	0.0391389
detection of external stimulus	0.000102	0.566572	0.0391389
sensory perception of light stimulus	0.00397	0.377715	0.0391389
detection of stimulus involved in sensory perception	0.000129	0.472144	0.0195695
detection of mechanical stimulus	0.000358	0.377715	0.00978474
detection of stimulus	0.00038	0.566572	0.0587084
sensory perception	0.00073	0.849858	0.18591
detection of mechanical stimulus involved in sensory perception	0.00307	0.283286	0.00978474
detection of mechanical stimulus involved in equilibrioception	0.00307	0.283286	0.00978474
equilibrioception	0.00307	0.283286	0.00978474
detection of mechanical stimulus involved in sensory perception of sound	0.00307	0.283286	0.00978474
response to mechanical stimulus	0.00662	0.377715	0.0489237
detection of chemical stimulus involved in sensory perception of taste	0.00881	0.188857	0
sensory perception of taste	0.00881	0.188857	0
Replication, transcription, translation
	pval	Test set	Control set
RNA-dependent DNA replication	0.000108	23.6072	18.7476
DNA metabolic process	0.000628	26.2512	21.8004
DNA replication	0.000647	23.7016	19.4325
DNA integration	0.0016	2.73843	1.41879
regulation of transcription, DNA-dependent	0.0018	5.47686	3.55186
regulation of transcription from RNA polymerase II promoter involved in ventral spinal cord interneuron specification	0.00881	0.188857	0
regulation of transcription from RNA polymerase II promoter involved in spinal cord motor neuron fate specification	0.00881	0.188857	0
transcription, DNA-dependent	0.0108	5.66572	4.07045
positive regulation of transcription, DNA-dependent	0.0164	1.41643	0.714286
Purine metabolism
	pval	Test set	Control set
nucleobase-containing compound metabolic process	0.000329	42.7762	37.3581
cGMP metabolic process	0.00066	0.472144	0.0391389
nucleic acid metabolic process	0.00153	32.1058	27.7104
cGMP biosynthetic process	0.00214	0.377715	0.0293542
cyclic purine nucleotide metabolic process	0.00237	0.566572	0.0978474
cyclic nucleotide metabolic process	0.00842	0.661001	0.18591
cyclic nucleotide biosynthetic process	0.0107	0.566572	0.146771
RNA process
	pval	Test set	Control set
regulation of RNA biosynthetic process	0.00223	5.47686	3.591
regulation of RNA metabolic process	0.00416	5.47686	3.70841
regulation of transcription from RNA polymerase II promoter involved in somatic motor neuron fate commitment	0.00881	0.188857	0
RNA biosynthetic process	0.015	5.66572	4.14873
Cell cycle
	pval	Test set	Control set
cell fate specification	0.00105	0.566572	0.0782779
regulation of transcription involved in cell fate commitment	0.00307	0.283286	0.00978474
cell fate commitment	0.00609	0.849858	0.273973
General metabolism
	pval	Test set	Control set
metabolic process	0.00832	62.6062	58.7671
nitrogen compound metabolic process	9.51e-06	47.1199	40.2446
cellular nitrogen compound metabolic process	0.000715	42.8706	37.7886
Signal transduction
	pval	Test set	Control set
positive regulation of cyclin-dependent protein kinase activity	0.00881	0.188857	0
Macromolecules process
	pval	Test set	Control set
cellular macromolecule biosynthetic process	0.0108	29.8395	26.4775
macromolecule biosynthetic process	0.0125	29.8395	26.5558
regulation of cellular macromolecule biosynthetic process	0.016	5.47686	4.00196
regulation of macromolecule biosynthetic process	0.0195	5.47686	4.05088
General cellular process
	pval	Test set	Control set
regulation of cellular biosynthetic process	0.0122	5.66572	4.0998
regulation of biosynthetic process	0.0128	5.66572	4.10959

## Sheet: Sheet3 - Male s#2
Replication, transcription, translation
	pval	Test set	Control set
gene expression	1.22e-24	19.0709	7.43509
translation	4.88e-23	8.92421	1.95712
translational initiation	1.03e-05	2.07824	0.521243
regulation of translational initiation	7.79e-05	0.855746	0.088513
regulation of translation	9.46e-05	1.22249	0.2262
protein-DNA complex assembly	0.000125	1.22249	0.236035
formation of translation preinitiation complex	0.000182	0.733496	0.0688434
protein-DNA complex subunit organization	0.000212	1.22249	0.255704
translational elongation	0.000432	1.22249	0.285208
posttranscriptional regulation of gene expression	0.000924	1.34474	0.383556
DNA-dependent transcription, termination	0.00155	0.366748	0.00983478
DNA strand elongation involved in DNA replication	0.00155	0.366748	0.00983478
DNA strand elongation	0.00155	0.366748	0.00983478
regulation of gene expression	0.00255	6.47922	4.21912
termination of RNA polymerase II transcription	0.00554	0.244499	0
DNA-dependent DNA replication	0.0106	0.733496	0.196696
General cellular process
	pval	Test set	Control set
cellular protein metabolic process	3.19e-24	22.8606	10.061
cellular component biogenesis	1.85e-14	7.09046	1.99646
cellular component organization or biogenesis	1.86e-10	11.0024	5.14359
cellular component assembly	4.95e-10	5.37897	1.68175
cellular component organization	1.51e-07	9.4132	4.83871
organelle organization	0.000181	5.62347	3.06845
cellular localization	0.000919	4.52323	2.49803
establishment of localization in cell	0.0019	3.91198	2.15382
negative regulation of biological process	0.00145	4.40098	2.47836
negative regulation of cellular process	0.00374	3.91198	2.262
biological regulation	0.00375	17.1149	13.6113
regulation of biological process	0.00389	16.5037	13.0704
membrane organization	0.00673	1.22249	0.442565
regulation of cellular biosynthetic process	0.012	5.99022	4.18961
regulation of biological quality	0.0123	3.42298	2.09481
regulation of biosynthetic process	0.0124	5.99022	4.19945
cell-cell recognition	0.0158	0.244499	0.00983478
cellular component morphogenesis	0.0159	1.71149	0.845791
nuclear envelope reassembly	0.0158	0.244499	0.00983478
organophosphate biosynthetic process	0.0184	2.07824	1.131
apoptotic process	0.0088	2.07824	1.03265
programmed cell death	0.006	2.20049	1.07199
death	0.000475	2.68949	1.131
cell death	0.00107	2.56724	1.131
Transport
	pval	Test set	Control set
intracellular transport	0.00262	3.30073	1.75059
organic substance transport	0.00424	4.27873	2.56688
vesicle-mediated transport	0.0184	2.07824	1.131
nucleic acid transport	0.0127	0.488998	0.088513
Energy
	pval	Test set	Control set
generation of precursor metabolites and energy	1.9e-15	3.30073	0.324548
oxidation-reduction process	3.82e-15	8.31296	2.55704
energy derivation by oxidation of organic compounds	2.58e-07	1.71149	0.236035
electron transport chain	2.67e-05	0.855746	0.0688434
cellular respiration	3.17e-05	1.10024	0.147522
ATP hydrolysis coupled proton transport	0.00019	0.855746	0.108183
energy coupled proton transmembrane transport, against electrochemical gradient	0.00019	0.855746	0.108183
aerobic respiration	0.000124	0.855746	0.0983478
hydrogen transport	0.000396	1.10024	0.2262
proton transport	0.000396	1.10024	0.2262
ATP biosynthetic process	0.00101	0.733496	0.108183
energy coupled proton transport, down electrochemical gradient	0.00257	0.611247	0.088513
energy reserve metabolic process	0.00257	0.611247	0.088513
respiratory electron transport chain	0.00089	0.488998	0.0295043
ATP synthesis coupled proton transport	0.00257	0.611247	0.088513
respiratory system process	0.00554	0.244499	0
ATP synthesis coupled electron transport	0.0158	0.244499	0.00983478
General metabolism
	pval	Test set	Control set
regulation of cellular metabolic process	2.76e-05	9.29095	5.55665
negative regulation of cellular metabolic process	0.000303	2.56724	1.01298
cofactor metabolic process	0.000997	1.58924	0.521243
glycosyl compound biosynthetic process	0.000286	1.34474	0.324548
cellular aldehyde metabolic process	0.00554	0.244499	0
response to organonitrogen compound	0.00453	0.855746	0.216365
response to nitrogen compound	0.00553	0.855746	0.2262
regulation of nitrogen compound metabolic process	0.0121	6.60147	4.71086
organonitrogen compound biosynthetic process	0.000348	2.81174	1.18017
cellular nitrogen compound biosynthetic process	0.000395	8.31296	5.30094
Carbone metabolism/catabolism
	pval	Test set	Control set
single-organism carbohydrate metabolic process	2.64e-05	3.05623	1.11133
organic acid metabolic process	1.51e-06	3.78973	1.32769
hexose metabolic process	1.62e-10	2.20049	0.2262
monosaccharide metabolic process	2.64e-10	2.20049	0.236035
glucose metabolic process	1.03e-09	1.83374	0.157356
single-organism carbohydrate catabolic process	2.16e-09	1.71149	0.137687
carbohydrate catabolic process	2.16e-09	1.71149	0.137687
glucose catabolic process	5.64e-08	1.46699	0.127852
glycolysis	5.96e-08	1.22249	0.0688434
monosaccharide catabolic process	9.76e-08	1.46699	0.137687
hexose catabolic process	9.76e-08	1.46699	0.137687
carboxylic acid metabolic process	8.74e-07	3.78973	1.28836
tricarboxylic acid cycle	7.79e-05	0.855746	0.088513
carbohydrate metabolic process	5.06e-06	4.40098	1.79976
dicarboxylic acid metabolic process	0.00115	0.611247	0.0688434
cellular carbohydrate metabolic process	0.000957	0.977995	0.20653
carbohydrate derivative biosynthetic process	0.000582	2.68949	1.15067
galactose metabolic process	0.00155	0.366748	0.00983478
glycerol-3-phosphate catabolic process	0.00155	0.366748	0.00983478
polysaccharide catabolic process	0.00554	0.244499	0
cellular polysaccharide catabolic process	0.00554	0.244499	0
glucan catabolic process	0.00554	0.244499	0
glycogen catabolic process	0.00554	0.244499	0
hexose biosynthetic process	0.0476	0.244499	0.0295043
monosaccharide biosynthetic process	0.0476	0.244499	0.0295043
malate metabolic process	0.03	0.244499	0.0196696
gluconeogenesis	0.03	0.244499	0.0196696
cellular carbohydrate catabolic process	0.03	0.244499	0.0196696
polysaccharide biosynthetic process	0.0173	0.366748	0.0491739
cellular carbohydrate biosynthetic process	0.0173	0.366748	0.0491739
cellular polysaccharide biosynthetic process	0.0173	0.366748	0.0491739
pyruvate metabolic process	0.0158	0.244499	0.00983478
glycogen metabolic process	0.00659	0.488998	0.0688434
cellular glucan metabolic process	0.00659	0.488998	0.0688434
glucan metabolic process	0.00659	0.488998	0.0688434
one-carbon metabolic process	0.00693	0.366748	0.0295043
glucan biosynthetic process	0.00693	0.366748	0.0295043
glycogen biosynthetic process	0.00693	0.366748	0.0295043
organic acid biosynthetic process	0.00869	1.22249	0.462234
carboxylic acid biosynthetic process	0.00869	1.22249	0.462234
glycerol-3-phosphate metabolic process	0.0115	0.366748	0.0393391
polysaccharide metabolic process	0.0127	0.488998	0.088513
cellular polysaccharide metabolic process	0.0127	0.488998	0.088513
Protein process
	pval	Test set	Control set
protein metabolic process	2.41e-14	24.9389	14.3981
protein folding	2.93e-13	3.05623	0.354052
protein complex subunit organization	1.78e-07	4.03423	1.31786
protein complex assembly	3.92e-07	3.42298	1.03265
protein complex biogenesis	4.61e-07	3.42298	1.04249
proteasomal protein catabolic process	9.97e-07	1.34474	0.147522
protein catabolic process	2.23e-06	4.76773	1.95712
proteasomal ubiquitin-dependent protein catabolic process	2.32e-06	1.22249	0.127852
regulation of protein metabolic process	4.99e-06	3.30073	1.131
protein polymerization	5.34e-06	1.34474	0.186861
regulation of cellular protein metabolic process	6.72e-06	3.17848	1.08183
cellular protein complex assembly	6.09e-05	1.46699	0.314713
cellular protein catabolic process	9.9e-05	4.03423	1.85877
proteolysis involved in cellular protein catabolic process	9.06e-05	4.03423	1.84894
protein localization	0.00277	3.91198	2.21282
protein transport	0.00227	3.42298	1.81943
establishment of protein localization	0.00278	3.42298	1.84894
positive regulation of ubiquitin-protein ligase activity	0.00284	0.488998	0.0491739
regulation of ubiquitin-protein ligase activity involved in mitotic cell cycle	0.00284	0.488998	0.0491739
regulation of ubiquitin-protein ligase activity	0.00284	0.488998	0.0491739
positive regulation of ubiquitin-protein ligase activity involved in mitotic cell cycle	0.00284	0.488998	0.0491739
regulation of protein ubiquitination	0.00361	0.611247	0.0983478
positive regulation of protein ubiquitination	0.00176	0.611247	0.0786782
intracellular protein transport	0.00365	2.56724	1.26869
signal peptide processing	0.00367	0.366748	0.0196696
negative regulation of ubiquitin-protein ligase activity	0.00367	0.366748	0.0196696
negative regulation of ubiquitin-protein ligase activity involved in mitotic cell cycle	0.00367	0.366748	0.0196696
negative regulation of cellular protein metabolic process	0.00424	0.977995	0.275374
anaphase-promoting complex-dependent proteasomal ubiquitin-dependent protein catabolic process	0.00445	0.488998	0.0590087
negative regulation of protein modification process	0.00453	0.855746	0.216365
regulation of protein catabolic process	0.00494	0.611247	0.108183
negative regulation of protein metabolic process	0.00507	0.977995	0.285208
peptidyl-cysteine modification	0.00554	0.244499	0
negative regulation of protein ubiquitination	0.00693	0.366748	0.0295043
protein polyubiquitination	0.00931	0.488998	0.0786782
regulation of protein modification process	0.0113	1.71149	0.806452
protein modification by small protein conjugation	0.0113	1.71149	0.806452
protein ubiquitination	0.00783	1.71149	0.767113
protein heterooligomerization	0.0115	0.366748	0.0393391
protein retention in ER lumen	0.0158	0.244499	0.00983478
maintenance of protein localization in endoplasmic reticulum	0.0158	0.244499	0.00983478
attachment of GPI anchor to protein	0.0158	0.244499	0.00983478
protein heterotetramerization	0.0158	0.244499	0.00983478
protein modification by small protein conjugation or removal	0.0172	1.71149	0.855625
ubiquitin-dependent protein catabolic process	0.0189	2.93399	1.78993
cellular protein localization	0.00225	3.05623	1.55389
maintenance of protein localization in organelle	0.00155	0.366748	0.00983478
Aminoacid metabolism
	pval	Test set	Control set
tRNA aminoacylation	0.00447	1.10024	0.344217
amino acid activation	0.00447	1.10024	0.344217
tRNA aminoacylation for protein translation	0.00447	1.10024	0.344217
threonyl-tRNA aminoacylation	0.00554	0.244499	0
alpha-amino acid metabolic process	0.0167	0.977995	0.363887
cellular amide metabolic process	0.0169	0.611247	0.157356
cellular amino acid metabolic process	4.41e-05	2.68949	0.934304
cellular amino acid biosynthetic process	0.0154	0.855746	0.285208
RNA process
	pval	Test set	Control set
RNA splicing	3.06e-11	2.81174	0.383556
mRNA metabolic process	3.9e-10	3.30073	0.649095
RNA processing	5.52e-10	4.64548	1.29819
mRNA splicing, via spliceosome	8.87e-09	1.95599	0.236035
RNA splicing, via transesterification reactions with bulged adenosine as nucleophile	8.87e-09	1.95599	0.236035
RNA metabolic process	1.1e-08	11.6137	6.08773
RNA splicing, via transesterification reactions	1.36e-08	1.95599	0.245869
mRNA processing	1.75e-08	2.68949	0.531078
tRNA metabolic process	0.000409	1.83374	0.599921
negative regulation of mRNA splicing, via spliceosome	0.000411	0.366748	0
regulation of RNA splicing	0.000415	0.611247	0.0491739
RNA localization	0.00143	0.733496	0.118017
negative regulation of mRNA processing	0.00155	0.366748	0.00983478
negative regulation of RNA splicing	0.00155	0.366748	0.00983478
mRNA transport	0.00284	0.488998	0.0491739
ncRNA metabolic process	0.00279	1.95599	0.826121
regulation of mRNA splicing, via spliceosome	0.00693	0.366748	0.0295043
mRNA cis splicing, via spliceosome	0.00693	0.366748	0.0295043
establishment of RNA localization	0.0127	0.488998	0.088513
RNA transport	0.0127	0.488998	0.088513
RNA catabolic process	0.0137	0.611247	0.147522
regulation of mRNA processing	0.0173	0.366748	0.0491739
negative regulation of RNA metabolic process	0.0194	1.46699	0.698269
Macromolecules process
	pval	Test set	Control set
macromolecular complex subunit organization	2.34e-10	5.13447	1.50472
macromolecular complex assembly	4.06e-10	4.52323	1.21951
macromolecule catabolic process	1.02e-07	5.50122	2.14398
cellular macromolecule catabolic process	1.03e-05	4.64548	2.02596
regulation of macromolecule metabolic process	1.25e-05	8.67971	4.94689
regulation of metabolic process	1.47e-05	9.9022	5.92054
macromolecule localization	0.000435	4.76773	2.56688
negative regulation of macromolecule metabolic process	0.000584	2.56724	1.07199
cellular macromolecule localization	0.00133	3.17848	1.57356
single-organism metabolic process	0.00612	19.6822	16.1782
small molecule biosynthetic process	0.00649	1.46699	0.590087
regulation of macromolecule biosynthetic process	0.0092	5.99022	4.12077
macromolecule modification	0.0145	8.55746	6.46145
regulation of cellular macromolecule biosynthetic process	0.0179	5.74572	4.09127
cellular macromolecular complex assembly	1.2e-11	3.78973	0.727773
Regulation of Ribonucleoprotein
	pval	Test set	Control set
ribonucleoprotein complex biogenesis	7.12e-10	2.81174	0.472069
ribosome biogenesis	2.65e-08	2.07824	0.304878
ribonucleoprotein complex assembly	0.000128	1.10024	0.186861
ribonucleoprotein complex subunit organization	0.000173	1.10024	0.196696
ribosome assembly	0.00367	0.366748	0.0196696
mature ribosome assembly	0.00554	0.244499	0
Response to environmental stimulus
	pval	Test set	Control set
response to stress	4.64e-07	5.99022	2.59638
reactive oxygen species metabolic process	0.00168	0.488998	0.0393391
response to antibiotic	0.0115	0.366748	0.0393391
response to stimulus	0.0124	12.7139	10.1101
response to corticosteroid stimulus	0.0158	0.244499	0.00983478
response to glucocorticoid stimulus	0.0158	0.244499	0.00983478
cellular response to stress	0.0189	2.93399	1.78993
xenobiotic metabolic process	0.0158	0.244499	0.00983478
response to inorganic substance	0.00195	0.733496	0.127852
response to metal ion	0.00257	0.611247	0.088513
response to acid	0.00155	0.366748	0.00983478
cellular response to amino acid stimulus	0.0158	0.244499	0.00983478
response to amine stimulus	0.0158	0.244499	0.00983478
response to amino acid stimulus	0.00155	0.366748	0.00983478
response to zinc ion	0.0158	0.244499	0.00983478
cellular response to acid	0.0158	0.244499	0.00983478
Purine metabolism
	pval	Test set	Control set
guanosine-containing compound metabolic process	9.76e-06	3.78973	1.47522
guanosine-containing compound catabolic process	1.05e-05	3.66748	1.40637
GTP catabolic process	1.05e-05	3.66748	1.40637
GTP metabolic process	2.09e-05	3.66748	1.46538
nucleoside biosynthetic process	0.000286	1.34474	0.324548
ribonucleoside monophosphate biosynthetic process	0.000304	1.10024	0.216365
ribonucleoside biosynthetic process	0.00023	1.34474	0.314713
nucleoside monophosphate biosynthetic process	0.000396	1.10024	0.2262
purine nucleoside biosynthetic process	0.000646	1.10024	0.245869
purine ribonucleoside biosynthetic process	0.000646	1.10024	0.245869
nucleoside phosphate biosynthetic process	0.00305	1.71149	0.6786
purine ribonucleoside monophosphate biosynthetic process	0.00232	0.855746	0.186861
purine nucleoside monophosphate biosynthetic process	0.00232	0.855746	0.186861
nucleotide biosynthetic process	0.00242	1.71149	0.65893
nucleobase-containing compound biosynthetic process	0.00279	7.45721	5.04524
purine ribonucleoside triphosphate biosynthetic process	0.00563	0.733496	0.167191
purine nucleoside triphosphate biosynthetic process	0.00563	0.733496	0.167191
ribonucleoside triphosphate biosynthetic process	0.0128	0.733496	0.20653
nucleoside triphosphate biosynthetic process	0.0128	0.733496	0.20653
nucleic acid phosphodiester bond hydrolysis	0.0153	0.733496	0.216365
purine-containing compound biosynthetic process	0.0193	1.10024	0.4524
nucleotide-sugar biosynthetic process	0.0158	0.244499	0.00983478
Chromatin structure
	pval	Test set	Control set
DNA conformation change	3.57e-05	1.83374	0.462234
DNA packaging	6.78e-05	1.34474	0.265539
nucleosome assembly	9.46e-05	1.22249	0.2262
chromatin assembly	9.46e-05	1.22249	0.2262
nucleosome organization	0.000164	1.22249	0.245869
chromatin assembly or disassembly	0.000212	1.22249	0.255704
chromatin silencing	0.00089	0.488998	0.0295043
negative regulation of gene expression, epigenetic	0.00089	0.488998	0.0295043
chromosome organization	0.00203	2.56724	1.19984
chromatin organization	0.00183	2.20049	0.944138
gene silencing	0.00361	0.611247	0.0983478
nucleus organization	0.00445	0.488998	0.0590087
regulation of gene silencing	0.00554	0.244499	0
regulation of chromatin silencing	0.00554	0.244499	0
Development
	pval	Test set	Control set
regeneration	0.000144	0.488998	0.00983478
growth	0.00012	1.71149	0.462234
single-organism developmental process	0.000315	5.99022	3.43234
muscle structure development	0.000641	1.34474	0.363887
determination of adult lifespan	0.000715	0.611247	0.0590087
multicellular organismal aging	0.000715	0.611247	0.0590087
organ development	0.00137	3.78973	2.01613
tissue regeneration	0.00155	0.366748	0.00983478
regulation of growth	0.00192	0.977995	0.236035
muscle organ development	0.00192	0.977995	0.236035
striated muscle tissue development	0.00232	0.855746	0.186861
anatomical structure development	0.00283	5.86797	3.74705
system development	0.00299	4.88998	2.97994
spindle organization	0.00445	0.488998	0.0590087
muscle tissue development	0.00366	0.855746	0.20653
embryonic development via the syncytial blastoderm	0.00367	0.366748	0.0196696
negative regulation of cell growth	0.00367	0.366748	0.0196696
wound healing	0.00453	0.855746	0.216365
organ regeneration	0.00554	0.244499	0
circulatory system development	0.00799	1.34474	0.531078
cardiovascular system development	0.00799	1.34474	0.531078
tissue development	0.00651	2.20049	1.08183
spindle elongation	0.00554	0.244499	0
binding of sperm to zona pellucida	0.00554	0.244499	0
multicellular organismal process	0.00805	7.94621	5.74351
negative regulation of growth	0.00693	0.366748	0.0295043
single-organism membrane organization	0.00703	1.10024	0.373721
single-organism biosynthetic process	0.00725	1.46699	0.599921
single-multicellular organism process	0.0077	7.82396	5.62549
striated muscle cell differentiation	0.0106	0.733496	0.196696
muscle cell differentiation	0.0113	0.855746	0.265539
heart development	0.0128	0.977995	0.344217
aging	0.0132	0.855746	0.275374
striated muscle cell development	0.0137	0.611247	0.147522
muscle cell development	0.0137	0.611247	0.147522
cell recognition	0.0115	0.366748	0.0393391
regulation of behavior	0.0115	0.366748	0.0393391
regulation of muscle system process	0.0127	0.488998	0.088513
germ-line stem cell maintenance	0.0158	0.244499	0.00983478
Heterocycle molecules
	pval	Test set	Control set
heterocycle biosynthetic process	0.000433	8.31296	5.32061
organic cyclic compound biosynthetic process	0.00052	8.31296	5.35995
tetrapyrrole biosynthetic process	0.000715	0.611247	0.0590087
aromatic compound biosynthetic process	0.000719	8.06846	5.2321
tetrapyrrole metabolic process	0.00115	0.611247	0.0688434
Cell cycle
	pval	Test set	Control set
G1/S transition of mitotic cell cycle	0.00659	0.488998	0.0688434
mitotic cell cycle phase transition	0.00955	0.855746	0.255704
cell cycle phase transition	0.00955	0.855746	0.255704
cell cycle process	0.00959	2.44499	1.30803
interphase of mitotic cell cycle	0.0127	0.488998	0.088513
interphase	0.0127	0.488998	0.088513
cell division	0.00245	1.34474	0.442565
mitotic spindle elongation	0.00554	0.244499	0
mitotic cell cycle	0.000945	1.83374	0.65893
mitotic spindle organization	0.000405	0.488998	0.0196696
Immune response
	pval	Test set	Control set
cellular response to cytokine stimulus	0.00361	0.611247	0.0983478
type I interferon production	0.0158	0.244499	0.00983478
regulation of type I interferon production	0.0158	0.244499	0.00983478
response to cytokine stimulus	0.0137	0.611247	0.147522
DNA repair
	pval	Test set	Control set
DNA replication, removal of RNA primer	0.00554	0.244499	0
positive regulation of ligase activity	0.00284	0.488998	0.0491739
negative regulation of ligase activity	0.00367	0.366748	0.0196696
regulation of double-strand break repair	0.00554	0.244499	0
regulation of ligase activity	0.00284	0.488998	0.0491739
regulation of double-strand break repair via homologous recombination	0.00554	0.244499	0
response to DNA damage stimulus	0.00579	2.56724	1.32769
regulation of DNA repair	0.0158	0.244499	0.00983478
Heme process
	pval	Test set	Control set
porphyrin-containing compound biosynthetic process	0.00284	0.488998	0.0491739
porphyrin-containing compound metabolic process	0.00284	0.488998	0.0491739
heme biosynthetic process	0.00367	0.366748	0.0196696
heme metabolic process	0.00367	0.366748	0.0196696
heme a biosynthetic process	0.00554	0.244499	0
heme a metabolic process	0.00554	0.244499	0
metallo-sulfur cluster assembly	0.0115	0.366748	0.0393391
iron-sulfur cluster assembly	0.0115	0.366748	0.0393391
Reproduction
	pval	Test set	Control set
single fertilization	0.0158	0.244499	0.00983478
sperm-egg recognition	0.00554	0.244499	0
male meiosis	0.0158	0.244499	0.00983478
General metabolism
	pval	Test set	Control set
oxoacid metabolic process	1.51e-06	3.78973	1.32769
response to ketone	0.00554	0.244499	0
regulation of primary metabolic process	5.09e-05	9.04645	5.47797
negative regulation of metabolic process	0.000526	2.68949	1.14083
cofactor biosynthetic process	0.00241	1.22249	0.373721

## Sheet: Sheet4 - Female s#2
Purine nucleotides metabolism
	pval	Test set	Control set
purine ribonucleoside monophosphate catabolic process	0.00242	13.6364	6.90547
ribonucleoside monophosphate catabolic process	0.00242	13.6364	6.90547
purine nucleoside monophosphate catabolic process	0.00242	13.6364	6.90547
nucleoside monophosphate catabolic process	0.00242	13.6364	6.90547
purine ribonucleoside monophosphate metabolic process	0.00364	13.6364	7.15473
purine nucleoside monophosphate metabolic process	0.00364	13.6364	7.15473
ribonucleoside monophosphate metabolic process	0.00391	13.6364	7.20089
nucleoside monophosphate metabolic process	0.00397	13.6364	7.21012
nucleobase-containing compound metabolic process	0.00579	48.0519	37.6754
purine ribonucleoside triphosphate catabolic process	0.00598	14.9351	8.47489
ribonucleoside triphosphate catabolic process	0.00598	14.9351	8.47489
purine nucleoside triphosphate catabolic process	0.00598	14.9351	8.47489
purine nucleoside catabolic process	0.00598	14.9351	8.47489
purine ribonucleoside catabolic process	0.00598	14.9351	8.47489
nucleoside catabolic process	0.00606	14.9351	8.48412
nucleoside triphosphate catabolic process	0.00606	14.9351	8.48412
ribonucleoside catabolic process	0.00606	14.9351	8.48412
ribonucleotide catabolic process	0.00629	14.9351	8.51182
purine ribonucleotide catabolic process	0.00629	14.9351	8.51182
purine nucleotide catabolic process	0.00637	14.9351	8.52105
purine-containing compound catabolic process	0.00637	14.9351	8.52105
nucleotide catabolic process	0.0067	14.9351	8.55798
nucleoside phosphate catabolic process	0.00678	14.9351	8.56721
purine ribonucleoside triphosphate metabolic process	0.00814	14.9351	8.70569
purine nucleoside triphosphate metabolic process	0.00814	14.9351	8.70569
ribonucleoside triphosphate metabolic process	0.00844	14.9351	8.73338
nucleoside triphosphate metabolic process	0.00864	14.9351	8.75185
nucleobase-containing compound catabolic process	0.00906	14.9351	8.78877
purine nucleoside metabolic process	0.00949	14.9351	8.8257
purine ribonucleoside metabolic process	0.00949	14.9351	8.8257
ribonucleoside metabolic process	0.0105	14.9351	8.90879
purine ribonucleotide metabolic process	0.0115	14.9351	8.98264
purine nucleotide metabolic process	0.0119	14.9351	9.01034
nucleoside metabolic process	0.0121	14.9351	9.01957
ribonucleotide metabolic process	0.0123	14.9351	9.03804
ribose phosphate metabolic process	0.0123	14.9351	9.03804
purine-containing compound metabolic process	0.0128	14.9351	9.06573
nucleotide metabolic process	0.0211	14.9351	9.50886
nucleoside phosphate metabolic process	0.0215	14.9351	9.52733
nucleobase-containing small molecule metabolic process	0.0252	14.9351	9.67504
Heterocycle molecules
	pval	Test set	Control set
cellular aromatic compound metabolic process	0.00453	50.6494	39.8541
organic cyclic compound metabolic process	0.00502	50.6494	39.9926
heterocycle metabolic process	0.00721	48.0519	37.9801
aromatic compound catabolic process	0.00917	14.9351	8.79801
heterocycle catabolic process	0.00938	14.9351	8.81647
organic cyclic compound catabolic process	0.00938	14.9351	8.81647
Carbon metabolism
	pval	Test set	Control set
glycosyl compound catabolic process	0.00606	14.9351	8.48412
carbohydrate derivative catabolic process	0.00686	14.9351	8.57644
organophosphate catabolic process	0.00721	14.9351	8.61337
glycosyl compound metabolic process	0.0121	14.9351	9.01957
General metabolism
	pval	Test set	Control set
organonitrogen compound catabolic process	0.00776	14.9351	8.66876
nitrogen compound metabolic process	0.00777	50.6494	40.6019
cellular nitrogen compound metabolic process	0.0078	48.0519	38.0908
cellular nitrogen compound catabolic process	0.00927	14.9351	8.80724
Chromatin structure
	pval	Test set	Control set
histone dephosphorylation	0.014	0.649351	0
Development
	pval	Test set	Control set
mesodermal cell fate specification	0.014	0.649351	0
pigment metabolic process involved in developmental pigmentation	0.014	0.649351	0
eye pigment biosynthetic process	0.014	0.649351	0
eye pigmentation	0.014	0.649351	0
eye pigment metabolic process	0.014	0.649351	0
pigment metabolic process involved in pigmentation	0.014	0.649351	0
pigmentation	0.0159	1.2987	0.110783
Neurological and brain process
	pval	Test set	Control set
asymmetric neuroblast division	0.014	0.649351	0
neuroblast division	0.014	0.649351	0
establishment of neuroblast polarity	0.014	0.649351	0
corpus callosum development	0.014	0.649351	0
establishment or maintenance of neuroblast polarity	0.014	0.649351	0
General cellular process
	pval	Test set	Control set
cellular zinc ion homeostasis	0.014	0.649351	0
regulation of sequestering of zinc ion	0.014	0.649351	0
sequestering of zinc ion	0.014	0.649351	0
somatic stem cell division	0.014	0.649351	0
endomembrane system organization	0.014	0.649351	0
synaptic vesicle membrane organization	0.014	0.649351	0
Immune response
	pval	Test set	Control set
NK T cell differentiation	0.014	0.649351	0
antigen processing and presentation, exogenous lipid antigen via MHC class Ib	0.014	0.649351	0
antigen processing and presentation of lipid antigen via MHC class Ib	0.014	0.649351	0
positive regulation of alpha-beta T cell differentiation	0.014	0.649351	0
positive regulation of alpha-beta T cell activation	0.014	0.649351	0
positive regulation of NK T cell differentiation	0.014	0.649351	0
regulation of NK T cell differentiation	0.014	0.649351	0
antigen processing and presentation via MHC class Ib	0.014	0.649351	0
Signal transduction
	pval	Test set	Control set
activation of Rac GTPase activity	0.014	0.649351	0
activation of Rho GTPase activity	0.014	0.649351	0
activation of Ras GTPase activity	0.014	0.649351	0
positive regulation of cyclin-dependent protein serine/threonine kinase activity involved in G1/S transition of mitotic cell cycle	0.014	0.649351	0
regulation of cyclin-dependent protein serine/threonine kinase activity involved in G1/S transition of mitotic cell cycle	0.014	0.649351	0
Cell cycle
	pval	Test set	Control set
positive regulation of G1/S transition of mitotic cell cycle	0.014	0.649351	0
Energy
ATP catabolic process	0.00242	13.6364	6.90547
ATP metabolic process	0.00319	13.6364	7.07164

## Sheet: Sheet5 - Male Adults
General metabolism
	pval	Test set	Control set
lipid metabolic process	0.00193	3.01508	1.32438
cellular aldehyde metabolic process	0.00285	0.335008	0
regulation of body fluid levels	0.00782	0.837521	0.179737
cellular lipid metabolic process	0.0117	2.17755	1.0122
long-chain fatty acid metabolic process	0.0138	0.502513	0.0662189
alditol phosphate metabolic process	0.01	0.502513	0.0567591
isoprenoid metabolic process	0.01	0.502513	0.0567591
Heterocycle molecules
	pval	Test set	Control set
organic cyclic compound biosynthetic process	0.0123	7.70519	5.37319
aromatic compound biosynthetic process	0.0126	7.53769	5.24075
tetrapyrrole biosynthetic process	0.0182	0.502513	0.0756787
heterocycle biosynthetic process	0.011	7.70519	5.33535
cellular nitrogen compound biosynthetic process	0.00662	7.8727	5.30697
Immune response
	pval	Test set	Control set
regulation of defense response	0.0136	0.670017	0.132438
immune effector process	0.0136	0.670017	0.132438
negative regulation of defense response	0.0159	0.335008	0.0189197
negative regulation of inflammatory response	0.0159	0.335008	0.0189197
regulation of immune effector process	0.00695	0.502513	0.0472992
regulation of adaptive immune response	0.00826	0.335008	0.00945984
negative regulation of immune response	0.00826	0.335008	0.00945984
negative regulation of immune effector process	0.00826	0.335008	0.00945984
response to molecule of bacterial origin	0.01	0.502513	0.0567591
response to lipopolysaccharide	0.01	0.502513	0.0567591
inflammatory response	0.01	0.502513	0.0567591
General cellular process
	pval	Test set	Control set
endocytosis	0.00067	1.17253	0.208117
cell growth	0.0165	0.670017	0.141898
wound healing	0.0175	0.837521	0.227036
phagocytosis	0.000821	0.670017	0.0472992
regulation of biological process	0.0143	16.2479	12.9789
phosphorylation	0.00397	7.70519	5.01372
glycosylation	0.00467	1.34003	0.397313
Transport
	pval	Test set	Control set
organic substance transport	0.0158	4.1876	2.56362
vesicle-mediated transport	0.00523	2.51256	1.12572
Replication, transcription, traduction
	pval	Test set	Control set
DNA replication, removal of RNA primer	0.00285	0.335008	0
DNA replication, Okazaki fragment processing	0.00826	0.335008	0.00945984
DNA strand elongation involved in DNA replication	0.0159	0.335008	0.0189197
DNA strand elongation	0.0159	0.335008	0.0189197
signal transduction involved in regulation of gene expression	0.0159	0.335008	0.0189197
lagging strand elongation	0.00826	0.335008	0.00945984
Response to environemental stimulus
	pval	Test set	Control set
response to glucose stimulus	0.0159	0.335008	0.0189197
response to hexose stimulus	0.0159	0.335008	0.0189197
response to monosaccharide stimulus	0.0159	0.335008	0.0189197
response to other organism	0.0165	0.670017	0.141898
response to oxygen-containing compound	0.0184	1.34003	0.520291
response to wounding	0.00149	1.34003	0.321635
response to stimulus	0.00165	13.9028	9.93284
Energy
	pval	Test set	Control set
oxidative phosphorylation	0.0159	0.335008	0.0189197
oxidation-reduction process	0.00192	5.19263	2.86633
generation of precursor metabolites and energy	0.00431	1.50754	0.482452
ATP synthesis coupled electron transport	0.00826	0.335008	0.00945984
Carbon metabolism
	pval	Test set	Control set
mannose metabolic process	0.0159	0.335008	0.0189197
hexose metabolic process	1.13e-07	2.17755	0.264876
monosaccharide metabolic process	1.55e-07	2.17755	0.274335
carbohydrate metabolic process	2.12e-07	5.36013	1.77845
single-organism carbohydrate metabolic process	1.15e-05	3.51759	1.09734
glycolysis	1.46e-05	1.17253	0.0945984
glucose catabolic process	0.000249	1.17253	0.170277
monosaccharide catabolic process	0.000325	1.17253	0.179737
hexose catabolic process	0.000325	1.17253	0.179737
single-organism carbohydrate catabolic process	0.000532	1.17253	0.198657
carbohydrate catabolic process	0.000532	1.17253	0.198657
galactose metabolic process	0.000584	0.502513	0.00945984
glycerol-3-phosphate catabolic process	0.000584	0.502513	0.00945984
glucose metabolic process	0.00103	1.17253	0.227036
carbohydrate derivative biosynthetic process	0.00686	2.51256	1.16356
glycerol-3-phosphate metabolic process	0.00452	0.502513	0.0378394
RNA process
	pval	Test set	Control set
RNA catabolic process	0.0198	0.670017	0.151357
response to stress	0.000745	5.19263	2.6866
Development
	pval	Test set	Control set
organ development	0.0035	3.8526	1.99603
anatomical structure development	0.00142	6.36516	3.68934
system development	0.00517	5.02513	2.95147
skeletal system development	0.0111	0.837521	0.198657
single-organism developmental process	0.000645	6.19765	3.39608
Macromolecules process
	pval	Test set	Control set
macromolecule glycosylation	0.00237	1.34003	0.350014
macromolecule modification	0.0019	9.71524	6.44215
Protein process
	pval	Test set	Control set
protein glycosylation	0.00237	1.34003	0.350014
protein modification process	0.004	9.04523	6.12052
peptidyl-tyrosine dephosphorylation	0.00315	1.34003	0.368934
cellular protein modification process	0.004	9.04523	6.12052
glycoprotein biosynthetic process	0.00467	1.34003	0.397313
glycoprotein metabolic process	0.00467	1.34003	0.397313
regulation of protein acetylation	0.00826	0.335008	0.00945984
regulation of peptidyl-lysine acetylation	0.00826	0.335008	0.00945984
protein dephosphorylation	0.00896	1.50754	0.548671
Heme process
	pval	Test set	Control set
heme a biosynthetic process	0.00285	0.335008	0
heme a metabolic process	0.00285	0.335008	0
porphyrin-containing compound biosynthetic process	0.01	0.502513	0.0567591
porphyrin-containing compound metabolic process	0.01	0.502513	0.0567591
Chromatin structure
	pval	Test set	Control set
gene silencing	0.00688	0.670017	0.104058
gene silencing by RNA	0.00695	0.502513	0.0472992
regulation of histone acetylation	0.00826	0.335008	0.00945984

## Sheet: Sheet6 - Female Adults
Cell Cycle
	pval	Test set	Control set
cell cycle	0.00563	4.20712	1.81416
regulation of mitotic cell cycle	0.00697	1.2945	0.221015
negative regulation of cell cycle	0.0125	1.2945	0.26706
cell cycle checkpoint	0.0169	1.2945	0.294686
cell cycle process	0.00384	3.55987	1.32609
Chromatin structure
	pval	Test set	Control set
DNA conformation change	0.0061	1.94175	0.497283
Neurological and brain process
	pval	Test set	Control set
synaptic transmission	0.0111	1.61812	0.405194
transmission of nerve impulse	0.0152	1.61812	0.44203
General cellular process
	pval	Test set	Control set
convergent extension	0.00722	0.647249	0.0276269
homophilic cell adhesion	4.35e-07	3.55987	0.432821
cell-cell adhesion	3.07e-06	3.55987	0.543328
regulation of biological process	0.000119	20.712	12.9386
multicellular organismal process	0.000119	11.3269	5.67271
regulation of cellular process	0.000204	19.7411	12.3952
single-multicellular organism process	0.000177	11.0032	5.56221
multicellular organismal development	0.000292	9.70874	4.78865
biological regulation	0.00039	20.712	13.5187
cell adhesion	0.00045	3.55987	0.994567
biological adhesion	0.00045	3.55987	0.994567
single-organism process	0.00154	34.9515	27.0191
Transport
	pval	Test set	Control set
positive regulation of intracellular transport	0.0146	0.647249	0.0460448
Reproduction
	pval	Test set	Control set
single organism reproductive process	0.00775	1.61812	0.368358
reproductive process	0.008	2.26537	0.69988
reproduction	0.0101	2.589	0.920895
cellular process involved in reproduction	0.013	1.61812	0.423612
gamete generation	0.0139	1.2945	0.276269
DNA repair
	pval	Test set	Control set
DNA repair	0.00866	2.91262	1.08666
Development
	pval	Test set	Control set
tissue development	0.00909	2.91262	1.09587
positive regulation of cellular process	0.0151	4.20712	2.07201
anatomical structure development	0.0155	6.47249	3.75725
mesoderm formation	6.49e-05	1.2945	0.0460448
mesoderm morphogenesis	0.000239	1.2945	0.0736716
mesodermal cell fate commitment	0.000763	0.647249	0
mesodermal cell differentiation	0.000763	0.647249	0
mesoderm development	0.000804	1.2945	0.110507
formation of primary germ layer	0.00103	1.2945	0.119716
developmental process	0.00106	10.0324	5.44249
tissue morphogenesis	0.00141	2.26537	0.497283
gastrulation	0.00064	1.61812	0.193388
cell fate commitment involved in formation of primary germ layer	0.0191	0.647249	0.0552537
Replication, transcription, traduction
	pval	Test set	Control set
regulation of DNA-dependent DNA replication	0.0106	0.647249	0.0368358
transcription, DNA-dependent	0.0126	7.11974	4.17165
regulation of gene expression	0.0157	7.11974	4.26374
DNA replication initiation	3.69e-05	1.2945	0.0368358
DNA unwinding involved in DNA replication	0.000201	0.970874	0.0184179
regulation of DNA replication	0.000462	1.2945	0.0920895
DNA-dependent DNA replication	0.000529	1.61812	0.184179
regulation of DNA-dependent DNA replication initiation	0.000763	0.647249	0
regulation of transcription, DNA-dependent	0.0031	7.11974	3.66516
DNA duplex unwinding	0.00129	1.2945	0.128925
DNA geometric change	0.00129	1.2945	0.128925
Amino acid metabolism
	pval	Test set	Control set
glutamine family amino acid biosynthetic process	0.0146	0.647249	0.0460448
peptidyl-serine modification	0.000462	1.2945	0.0920895
peptidyl-serine phosphorylation	0.000462	1.2945	0.0920895
proline metabolic process	0.00441	0.647249	0.0184179
RNA process
	pval	Test set	Control set
RNA biosynthetic process	0.015	7.11974	4.24533
regulation of RNA metabolic process	0.00483	7.11974	3.81251
regulation of RNA biosynthetic process	0.00347	7.11974	3.702
Macromolecules process
	pval	Test set	Control set
regulation of macromolecule metabolic process	2.44e-05	11.0032	5.00046
regulation of macromolecule biosynthetic process	0.000271	8.73786	4.08877
regulation of cellular macromolecule biosynthetic process	0.000228	8.73786	4.04273
General metabolism
	pval	Test set	Control set
regulation of primary metabolic process	7.06e-05	11.3269	5.51616
regulation of cellular metabolic process	0.000212	11.0032	5.61746
regulation of DNA metabolic process	0.000281	1.61812	0.156552
regulation of metabolic process	0.000326	11.3269	5.99503
regulation of cellular biosynthetic process	0.000342	8.73786	4.15324
regulation of biosynthetic process	0.000354	8.73786	4.16245
regulation of nitrogen compound metabolic process	0.000188	9.70874	4.65973
Purine metabolism
	pval	Test set	Control set
regulation of nucleobase-containing compound metabolic process	0.00017	9.70874	4.6321
