# Supplementary material for: Sex-Biased Transcriptome of Schistosoma mansoni: Host-Parasite Interaction, Genetic Determinants and Epigenetic Regulators Are Associated with Sexual Differentiation
Source: PLoS Negl Trop Dis. 2016 Sep 27;10(9):e0004930. doi: 10.1371/journal.pntd.0004930 (PMC5038963; doi:10.1371/journal.pntd.0004930)
Supplement: S4 Table — (XLSX) [file pntd.0004930.s007.xlsx]

## Sheet: Sheet2 - Development
DEVELOPMENTAL GENES (129 hits)
Gene ID (v5.2)	CuffLinks IDs	Predictive product	Chromosomal location	Sex of bias	Fold Change			Expression level average (rpkm)			Specific remarks
					Cercariae	Schistosomula S#2	Adults	Cercariae	Schistosomula S#2	Adults
HOMEOTIC GENES
Smp_017020	XLOC_024624	visual system homeobox 2	PSA4	♀	Inf	N.S.	N.S.	75.6314768772976	3.63910075292765	1.83345752170883
Smp_138140	XLOC_014466	gsx family homeobox protein	SC_0124	♀	392.443328235406	N.S.	N.S.	81.3009048387775	9.47960063615369	1.83197663477198
Smp_161270	XLOC_031472	homeobox domain containing protein	SC_0177	♀	190.731410860984	N.S.	N.S.	217.182592870059	13.8099478020568	9.05464129818456	100*
Smp_045470	XLOC_028377	Prospero-like homeobox domain containing protein	SC_0037	♀	145.877918253923	N.S.	N.S.	285.561509809869	262.009787535084	32.0110937421613	100*
Smp_170750	XLOC_017450	paired box protein pax-6	4	♀	141.354619105841	N.S.	N.S.	102.419176939636	22.1252521387773	29.747085833478	qPCR
Smp_013600	XLOC_012965	nk homeobox protein	3	♀	128.759789676702	N.S.	N.S.	26.8134888948815	3.74604911452087	0.209585318764443
Smp_160670	XLOC_016875	paired box protein pax-6	4	♀	93.8554587907283	N.S.	N.S.	87.8460678028075	11.2875227944437	14.1227188790341
Smp_140350	XLOC_010806	homeobox protein aristaless-related	2	♀	79.1078439761949	N.S.	N.S.	16.5534391678678	0.159911338667284	2.28424726676357
Smp_126560	XLOC_005102	orthopedia homeobox protein	1	♀	77.6914691778477	N.S.	8.45221978066881	96.9707675121791	16.3166513832517	14.7061656866022
Smp_097470	XLOC_006267	homeobox protein aristaless-related	1	♀	59.1752544656473	N.S.	N.S.	209.571569809976	9.4298419408366	8.14387608700876
Smp_079260	XLOC_003667	lim homeobox protein	1	♀	40.2788081427907	N.S.	N.S.	42.3376630050034	10.2551766901969	10.1360467051365
Smp_144120	XLOC_002958	lim homeobox protein awh	1	♀	33.9656464613705	N.S.	N.S.	64.7636854846942	36.6192842063342	16.339063289712
Smp_027990	XLOC_006236	nk homeobox 2-1	1	♀	27.5897353306251	N.S.	N.S.	100.216298186976	30.7092692514097	16.2334909772505
Smp_169500	XLOC_031015	antennapedia-like homeobox protein	SC_0164	♀	26.683275168684	N.S.	N.S.	62.5072302068936	24.5188569056866	7.74296495259244
Smp_129480	XLOC_011527	lim homeobox 5	3	♀	26.4332011074898	N.S.	N.S.	87.348588635519	22.0668286783601	11.3298764422245
Smp_163140	XLOC_027318	pituitary homeobox	PSA4	♀	26.0112593263876	N.S.	N.S.	41.7600226162193	5.63896093749002	4.98339610858815
Smp_129490	XLOC_011525	lim homeobox protein lhx5-like	3	♀	18.7727236802313	N.S.	N.S.	20.2799196374299	3.30285475401848	0.726718613746301
Smp_136900	XLOC_017332	homeobox protein distal-less dlx	4	♀	17.2630443180791	N.S.	N.S.	18.7315150454342	5.06459381737713	2.46377278416077
Smp_053520	XLOC_016808	homeobox protein aristaless-like 3	4	♀	12.9325102054732	N.S.	N.S.	15.7819664395375	11.3412632070936	8.87092513754124
Smp_174610	XLOC_032224	lim homeobox protein lhx3-like isoform 1	SC_0204	♀	4.50396915067674	N.S.	8.68410931778577	38.3372024044035	101.815237688904	30.0765343047939
Smp_128060	XLOC_029282	homeotic protein spalt-major	SC_0097	♀	4.43399624585829	N.S.	N.S.	206.125364090247	87.3877429488463	127.464538195718
Smp_035650	XLOC_000614	homeobox protein aristaless-related	1	♀	4.39225121149728	N.S.	N.S.	442.397043098215	206.356701543166	235.367532391501
Smp_164180	XLOC_002197	par domain protein	1	♀	4.35856983269832	N.S.	N.S.	72.2243513899713	5.30785612278046	13.7369926669039
Smp_173830	XLOC_006593	homeodomain transcription factor 2	SC_0010	♀	4.12570162629074	N.S.	N.S.	2840.35874281503	638.928783828946	1364.28953558074
Smp_149570	XLOC_028932	pou class transcription factor 1-a-like	SC_0062	♀	3.77928872727874	N.S.	N.S.	74.6240359631302	18.7838783068485	54.4378264768318
Smp_146580	XLOC_009767	homeobox protein meis3	2	♀	3.43775318806138	N.S.	N.S.	1114.70485997489	678.352759582864	513.63284742199
Smp_137890	XLOC_011364	homeobox protein 4	3	Switch	3.25248684878111	N.S.	0.473735365765834	734.789792357979	121.735326348771	270.248174744286
Smp_199560	XLOC_033843	homeodomain transcription factor 1	SC_0331	♀	2.90938276804373	N.S.	N.S.	6792.0852519512	1991.71716267723	3775.58331063921
Smp_142440	XLOC_007652	retinal homeobox 1a	2	♀	N.S.	4.04632762360609	N.S.	17.398383049191	52.2228454653706	36.4354730445078
Smp_142430	XLOC_007651	paired box protein pax-1-related	2	♀	N.S.	N.S.	Inf	0	11.0826945270142	9.30071558583317
Smp_162760	XLOC_024267	homeobox protein prospero	PSA4	♀	N.S.	N.S.	3.20753267186545	114.919822658865	113.649754168226	188.189669690299
Smp_003280	XLOC_000398	lim homeobox protein lhx2- partial	1	♀	N.S.	N.S.	2.18214566094815	181.479890091985	127.956965404692	343.132156841785
Smp_144380	XLOC_013486	muscle segment homeobox d	3	♂	0.320134514774646	N.S.	0.440308772736031	125.543631045515	52.3187508013765	191.455853660264
Smp_009040	XLOC_015065	pou4 brn-3	4	♂	0.173569725475051	N.S.	3.51138590861684	114.653459131973	223.807107453683	436.529283039305
Smp_063520	XLOC_005689	pre-b-cell leukemia transcription factor 4	1	♂	0.0308075788510402	N.S.	3.10699203821574	41.7302272517886	8.78035069483458	127.486477428938
Smp_145200	XLOC_026961	homeobox protein engrailed- partial	PSA4	♂	0.0195932801547894	N.S.	N.S.	63.9305429625621	121.647515082049	181.292183077365
Smp_127240	XLOC_029617	homeobox protein six-related	SC_0125	♂	0.0159738866413291	N.S.	0.318363911402314	243.399189904345	26.2712507341129	158.784048346551
Smp_154800	XLOC_005605	homeobox protein	1	♂	0	N.S.	0.083177720507641	31.2370893661103	0	26.3140888819888
Smp_138390	XLOC_012123	homeobox protein nkx- -like	3	♂	N.S.	N.S.	0.203620179223748	71.5450491521376	12.5039195954386	70.2884807579063
FORKHEADBOX TRANSCRIPTION FACTORS					N.S.	N.S.	N.S.	#N/A	#N/A	#N/A
Smp_155010	XLOC_028980	forkhead box protein j3- partial	SC_0062	♀	3.38792088521768	N.S.	N.S.	152.744958604793	43.3387411911828	124.701869951869
Smp_158750	XLOC_022349	forkhead protein forkhead protein domain	Z1	♀	N.S.	N.S.	12.7551411439285	11.4969076701692	53.2048590071321	46.2666242208036
Smp_054350	XLOC_026755	forkhead protein forkhead protein domain	PSA4	♀	N.S.	N.S.	0.321381365994821	686.488203313217	139.440902973102	639.926106385399
Smp_127090	XLOC_020765	forkhead protein forkhead protein domain	6	♀	Inf	N.S.	N.S.	36.4272671674165	2.56376512284438	0.266916745967908
Smp_012010	XLOC_019326	forkhead box subgroup partial	6	♀	12.0446935379093	N.S.	N.S.	5967.94700757691	2451.37832090058	1628.63606810006
Smp_145650	XLOC_025552	forkhead box protein k2	Z2	♂	0.275992422006826	N.S.	0.467841698337024	350.873010166404	305.480044195458	505.346813198387
Smp_131620	XLOC_010682	forkhead-associated domain-containing protein 1	2	♂	0.222627411010836	N.S.	N.S.	104.350439987551	63.5696460060105	235.393696191297
Smp_145640	XLOC_022766	forkhead protein forkhead protein domain	Z2	♂	0.185129141038852	N.S.	N.S.	738.648292835802	713.236802409886	1085.6672840687
Smp_076300	XLOC_030153	forkhead protein forkhead protein domain	SC_0138	♂	0.0868760796254027	N.S.	0.372957382630714	1016.30942403902	295.658029637955	1776.82589821194
Smp_133460	XLOC_029123	forkhead transcription factor j1	SC_0080	♂	N.S.	N.S.	0	2.29797560830332	0	6.45898308299424
OTHER DEVELOPMENTAL GENES			#N/A		N.S.	N.S.	N.S.	#N/A	#N/A	#N/A
N.A.	XLOC_031421	achaete-scute homolog 4	SC_0176	♀	Inf	N.S.	N.S.	6.30262307310813	2.15793037338557	0.266916745967908
Smp_124340	XLOC_003427	Nose resistant to fluoxetine protein 6	1	♀	164.961289284563	N.S.	N.S.	2450.39372940002	55.1988453807741	47.3073596593849	100*
Smp_203270	XLOC_021007	twist-related protein 2	7	♀	115.811160901474	7.75826247070775	31.2735775716733	35.7659675588445	26.5594702959982	16.7375350299233
Smp_150100	XLOC_016288	protein ctbp isoform a	4	♀	30.9326881268667	N.S.	N.S.	13.197104906023	4.93724163002159	1.32549318789414
Smp_142120	XLOC_007100	achaete-scute transcription factor-related	1	♀	28.6814033019599	N.S.	23.6586743555682	81.7923295570068	306.560991237781	19.1094739247028
Smp_173090	XLOC_025102	eyes absent homolog	Z1	♀	8.5129842075761	4.87475527808075	9.09824399279559	26.3582690447818	52.2995018239422	18.2999151997591
Smp_156650	XLOC_016571	t-box transcription factor -related	4	♀	7.25129085133239	N.S.	N.S.	127.703333620101	136.944462224948	36.6473409190338
Smp_000950	XLOC_003154	mab-21-like 1	1	♀	6.47284499001979	N.S.	N.S.	138.24354139811	182.469796649416	69.6570760748227
Smp_004680	XLOC_008807	interferon-related developmental regulator-related	2	♀	4.1439242438064	N.S.	N.S.	29806.5406074285	11774.4976590569	10388.522629609
Smp_145230	XLOC_024066	t-box transcription factor tbx2	PSA4	♀	3.94775691357707	N.S.	N.S.	109.254815759453	81.3655301213	87.7197807338643	100* & qPCR
Smp_178780	XLOC_023170	Single-minded protein 2 (basic helix-loop-helix transcription factor)	Z3	♀	N.S.	7.15667942634564	39.1053375092252	10.445082525153	25.5308502245529	20.7398053325051	100*
Smp_135110	XLOC_010345	at-rich interactive domain arid3	2	♀	N.S.	N.S.	1.98536139278877	444.252064528078	945.604730910179	906.028679571013
Smp_156100	XLOC_028553	integral membrane protein gpr177	SC_0041	♂	0.341424032340282	N.S.	N.S.	1332.96718142451	3320.81587696705	3191.46036825509
N.A.	XLOC_029601	protein lines homolog	SC_0125	♂	0.31794183788484	N.S.	N.S.	575.240620901035	896.553497376668	824.263909294611
Smp_123230	XLOC_020103	sm50 protein	6	♂	0.179222469098235	N.S.	N.S.	280.218425889714	116.588836479054	553.451767459258
Smp_162060	XLOC_000433	nose resistant to fluoxetine protein 6 precursor	1	♂	0.130393003399211	N.S.	0.266982032129345	1998.29232059157	456.03187672695	1986.57565249909
Smp_170550	XLOC_005011	granulin	1	♂	0.0935750952756984	N.S.	0.42612838025217	19915.3659186898	11096.8165013708	28765.4515600333
Smp_135380	XLOC_026693	hunchback protein	PSA4	♂	0.0585361663139943	N.S.	0.358408298766615	319.846006931865	86.6246613172937	625.954308018848
Smp_125730	XLOC_004283	pet domain containing protein	1	♂	N.S.	0.41548750907107	N.S.	9895.88065321958	4402.07677178153	8175.73220208239
N.A.	XLOC_024774	muscle m-line assembly protein unc-89	PSA1	♂	N.S.	N.S.	0.526759228052657	8838.09534105752	4722.98515870872	13549.6292819089
Smp_003900	XLOC_000290	t-box transcription factor tbx20	1	♂	N.S.	N.S.	0.489403063839497	200.798303951193	95.2822471199415	310.84218467745
NEURAL DEVELOPMENT			#N/A		N.S.	N.S.	N.S.	#N/A	#N/A	#N/A
N.A.	XLOC_001835	semaphorin 5-related	nd	♀	Inf	N.S.	N.S.	9.91365060335811	1.43920204800555	2.84231219144015
N.A.	XLOC_031072	ankyrin unc44	nd	♀	45.976467748801	N.S.	N.S.	9.70719048976232	0	0.209585318764443
N.A.	XLOC_032008	semaphorin 5-related	nd	♀	13.1809854967922	N.S.	N.S.	17.4750968824221	1.41129413715498	1.45491811442945
N.A.	XLOC_026342	semaphorin 5-related	nd	♀	12.5868334347919	N.S.	N.S.	44.8186838879425	12.6021402257426	10.6345900602196
N.A.	XLOC_022487	ankyrin unc44	nd	♀	8.20838381425686	N.S.	N.S.	73.0151864402187	7.34323476854233	17.7897095759242
N.A.	XLOC_021351	semaphorin 5-related	nd	♀	7.50602206226422	N.S.	N.S.	16.5374927113073	3.14507205703273	10.0951150754417
Smp_021340.2	XLOC_013252	mxi neural development protein	nd	♀	4.42110967301285	N.S.	N.S.	25523.7930940577	12257.5480319457	13114.0173453931
N.A.	XLOC_026436	semaphorin 5-related	nd	♀	3.66804276357007	N.S.	N.S.	305.841048879652	61.1812441763447	166.923981004944
Smp_151350	XLOC_032400	dyslexia susceptibility 1 candidate gene 1 protein homolog isoform x1	nd	♀	2.89105741809303	N.S.	N.S.	521.160620273951	86.6694465786323	336.207596884461
Smp_180290	XLOC_004413	membrane-associated guanylate ww and pdz domain-containing protein 2	nd	♀	N.S.	2.8403093667121	2.47924133411008	328.535742873335	403.37737960236	1046.07538116212
Smp_139480	XLOC_029571	Ephrin type-A receptor	nd	♀	N.S.	N.S.	5.38698074588052	182.213322884455	156.965218242798	401.309557567675	100*
Smp_151310	XLOC_026709	Netrin-1	nd	♀	N.S.	N.S.	4.99846111248763	219.233529255151	743.017231346995	867.041197447453	100*
N.A.	XLOC_002573	semaphorin 5-related	nd	♀	N.S.	N.S.	4.50088270639811	20.2355565424796	15.6598477914003	29.8651676996473
N.A.	XLOC_002038	tubby-related protein 3-like	nd	♀	N.S.	N.S.	3.80265834533292	11.0314004075351	5.34647118733113	36.0088546575119
Smp_181040	XLOC_000070	kif1-binding protein homolog	nd	♀	N.S.	N.S.	2.78929160820278	161.829403047212	144.067556587942	273.564675476234
Smp_172470	XLOC_019425	netrin receptor unc5	nd	♀	N.S.	N.S.	2.41647020720085	46.4880010975738	122.143872679278	134.249260624242
Smp_082300	XLOC_019436	lipid phosphate phosphatase-related protein type 1-like	nd	♀	N.S.	N.S.	2.04989951557818	327.582332741978	193.940857474698	329.748672352376
N.A.	XLOC_025534	afg3-like protein 2 (m41 family)	nd	♂	0.29862806428828	N.S.	N.S.	547.078531428431	1158.48877922017	844.293826488929
Smp_058240	XLOC_023434	reticulon-4 (neurite outgrowth inhibitor)	nd	♂	0.286234396860905	0.472654011319859	N.S.	4114.9990663083	6459.34630522407	6321.47120118259
Smp_152080	XLOC_009423	rest corepressor	nd	♂	0.285948901745223	0.345486403738752	N.S.	1145.01075548105	1460.06997771675	1611.84552692592
N.A.	XLOC_028837	DISCO Interacting Protein 2 Homolog	nd	♂	0.283344793271467	N.S.	N.S.	1594.53422028052	2036.01892638313	2985.51592835554	100*
Smp_051390	XLOC_028722	nif3-like protein 1	nd	♂	0.272360826522373	N.S.	N.S.	1505.82465838331	2263.86286806089	2543.58224219683
Smp_104390	XLOC_010151	irregular chiasm c-roughest	nd	♂	0.213824665818582	N.S.	N.S.	1646.04115493869	3301.80898146839	3608.04120940745
Smp_123330	XLOC_020128	protein nedd1	nd	♂	0.210350529511719	N.S.	N.S.	1878.6746955684	3485.96707061258	2779.97091263773
Smp_165440	XLOC_023238	netrin receptor unc5	nd	♂	0.146307693062121	N.S.	N.S.	1387.76697055773	2082.07619276827	2411.01355271296
Smp_162490	XLOC_023472	Protein eva-1 homolog c-like	nd	♂	0.145388958112206	N.S.	N.S.	21.0577630315029	11.7406587988775	38.8231465128337	100*
N.A.	XLOC_016083	roundabout homolog 2	nd	♂	0.133549703564186	N.S.	N.S.	29.1340968099287	20.860012350608	41.6523979146651
N.A.	XLOC_023237	netrin receptor unc- partial	nd	♂	0.0889344520627479	N.S.	N.S.	276.411633893931	390.910129204345	519.049369993618
Smp_127870	XLOC_021398	neurotrimin precursor	nd	♂	0.0888722735726706	N.S.	N.S.	576.261945783429	842.876337805977	913.542454459493
Smp_153440	XLOC_018474	neuropilin and tolloid -like	nd	♂	0.0725377359423204	N.S.	N.S.	961.137164899946	643.961085938409	1936.24937877991
Smp_158550	XLOC_005624	semaphorin 5-related	nd	♂	0.0683701560575499	N.S.	N.S.	1504.60792293037	1389.69169675745	2360.0478475132
Smp_146840	XLOC_023653	netrin 1	nd	♂	0.0335895003892019	N.S.	N.S.	618.142897101924	588.925856239738	1211.4363167618
N.A.	XLOC_030053	neuropilin and tolloid -like	nd	♂	0.032469341810337	N.S.	0.152317766616817	22.3719663074216	1.50186169714184	22.3471738580397
Smp_165550	XLOC_025532	afg3-like protein 2	nd	♂	N.S.	0.407393069237883	N.S.	2890.13134902777	5950.94621200781	3640.83616195292
CRANIOFACIAL DEVELOPMENT PROTEINS			nd		N.S.	N.S.	N.S.	#N/A	#N/A	#N/A
N.A.	XLOC_033242	craniofacial development protein 2-like	nd	♀	Inf	N.S.	N.S.	7.80297382607578	1.67790886554627	0.79314058289517
N.A.	XLOC_002946	craniofacial development protein 2-like	nd	♀	Inf	N.S.	N.S.	6.41450255484346	1.89160313683173	0.259307090959354
N.A.	XLOC_026181	craniofacial development protein 2-like	nd	♀	105.593200785446	N.S.	N.S.	98.7164435541359	0	0.993635359714209
N.A.	XLOC_014088	craniofacial development protein partial	nd	♀	90.4570643368609	N.S.	N.S.	18.8986355870704	6.33395359544606	5.91395009169416
N.A.	XLOC_023418	craniofacial development protein 2-like	nd	♀	36.0039298903681	N.S.	N.S.	87.2363505222211	25.6517002880445	6.366142304464
N.A.	XLOC_001151	craniofacial development protein partial	nd	♀	20.209682107344	N.S.	N.S.	21.7537379082687	3.34476985292467	7.71413402059762
N.A.	XLOC_001351	craniofacial development protein 2-like	nd	♀	12.4955182411221	N.S.	N.S.	44.517463826705	4.46904543592605	11.2788957633162
N.A.	XLOC_028609	craniofacial development protein 2-like	nd	♀	12.3882984987362	N.S.	N.S.	26.2317153776159	2.24849793337243	3.68479572786326
N.A.	XLOC_030150	craniofacial development protein 2-like	nd	♀	12.2245386315922	N.S.	N.S.	25.8110699822077	34.1462133209164	9.20549272203045
N.A.	XLOC_001138	craniofacial development protein partial	nd	♀	12.0182565391589	N.S.	N.S.	141.985107388146	14.1380722122346	26.9410546248483
N.A.	XLOC_026879	craniofacial development protein 2-like	nd	♀	10.6257805949606	N.S.	N.S.	23.8479938324242	0.319822677334568	1.679722743211
N.A.	XLOC_029492	craniofacial development protein 2-like	nd	♀	8.44731826372714	N.S.	N.S.	17.5696960964409	5.61371413202764	2.46229189722392
N.A.	XLOC_008563	craniofacial development protein partial	nd	♀	6.8520923798809	N.S.	N.S.	45.1944499646176	7.06688084812058	7.79378879305723
N.A.	XLOC_027045	craniofacial development protein 2-like	nd	♀	4.62761333754009	5.26115679050011	3.27746873791796	70.8511650586494	56.1465913929429	58.6280714908323
Smp_160230	XLOC_017762	craniofacial development protein partial	nd	♀	4.53079971999256	N.S.	N.S.	46.6077256324409	8.64771905071264	21.5523047210333
N.A.	XLOC_013200	craniofacial development protein partial	nd	♀	3.99473720762988	N.S.	N.S.	54.3626053137693	44.8556545575727	43.9704771262744
N.A.	XLOC_005136	craniofacial development protein 2-like	nd	♀	3.64406279638897	N.S.	N.S.	100.020232217557	82.9788302754183	74.7437298537285
N.A.	XLOC_000330	craniofacial development protein partial	nd	♀	N.S.	Inf	N.S.	5.22684980468805	9.5317011377154	6.04616319376051
N.A.	XLOC_004728	craniofacial development protein 2-like	nd	♀	N.S.	4.66623886711544	N.S.	62.5492434177128	67.9945912973666	73.5561981326648
N.A.	XLOC_001342	craniofacial development protein 2-like	nd	♀	N.S.	N.S.	3.85448311795144	47.0001131123307	36.1118530177546	43.9286654085332
N.A.	XLOC_008000	craniofacial development protein partial	nd	♀	N.S.	N.S.	2.41082439391774	144.32108350669	130.259016892454	136.766630562316
N.A.	XLOC_014265	craniofacial development protein 2-like	nd	♂	0.265659285053209	N.S.	N.S.	58.9368629064861	26.4913960888806	96.8004484321454
Smp_091870	XLOC_006671	craniofacial development protein 2-like	nd	♂	0.239013674414996	N.S.	0.441731116452451	2030.65575736269	1004.44525307234	2641.77334484333
Smp_187700	XLOC_027387	craniofacial development protein 2-like	nd	♂	0.207668625272751	N.S.	N.S.	1191.93791967794	1336.92977573126	2046.6345032687
Smp_159760	XLOC_003756	craniofacial development protein partial	nd	♂	0.125373768740198	N.S.	N.S.	123.671999203857	69.4342628428897	263.94079214994
N.A.	XLOC_003492	craniofacial development protein 2-like	nd	♂	0.0669680304427553	N.S.	N.S.	39.4444441960368	5.23337115990042	52.2214637216141
Smp_120330	XLOC_023452	craniofacial development protein 2-like	nd	♂	0.034913317349087	N.S.	N.S.	14.4561626849807	4.47548459360098	20.4269875659732
N.A.	XLOC_019412	craniofacial development protein 2-like	nd	♂	0.00563970538733338	N.S.	N.S.	125.454565838453	94.0022821315328	251.706342392184
Smp_006970	XLOC_014627	craniofacial development protein 2-like	nd	♂	N.S.	0.430778782406588	0.410271678831469	1881.24162314042	1062.07181987442	1927.19701942112
N.A.	XLOC_034631	craniofacial development protein 2-like	nd	♂	N.S.	N.S.	0.453347825120134	432.021194859018	200.987047750281	347.154265606797
N.A.	XLOC_030037	craniofacial development protein 2-like	nd	♂	N.S.	N.S.	0.397667799213931	142.919841233027	57.5497787078454	106.232183177851
Smp_180050	XLOC_022745	craniofacial development protein 2-like	nd	♂	N.S.	N.S.	0.303305666443756	154.712105402551	61.0534907246226	118.255987565856
N.A.	XLOC_014037	craniofacial development protein 2-like	nd	♂	N.S.	N.S.	0.22337981403147	219.688243310365	25.8706835156133	156.460505277656
N.A.	XLOC_026461	craniofacial development protein 2-like	nd	♂	N.S.	N.S.	0.206543702694239	72.7021761818451	4.35725409463277	59.2282168238092
N.A.	XLOC_001643	craniofacial development protein 2-like	nd	♂	N.S.	N.S.	0	6.29604925886348	0	6.20856131365599
SPECIFIC PATHWAYS (57 hits)					N.S.	N.S.	N.S.
Gene ID	RNAseq experiment ID	Predictive product	Chromosomal location	Sex of bias	Fold Change			Expression level average (rpkm)			Specific remarks
					Cercariae	Schistosomula S#2	Adults	Cercariae	Schistosomula S#2	Adults
EPIDERMAL GROWTH FACTOR (EGF) PATHWAY			#N/A		N.S.	N.S.	N.S.	#N/A	#N/A	#N/A
Smp_153600	XLOC_023411	cadherin egf lag seven-pass g-type receptor 1	PSA4	♀	40.0136899967449	N.S.	N.S.	278.438568409795	5.12080359617639	16.0038348316504
Smp_044530	XLOC_025348	growth factor receptor bound protein 2	Z1	♂	0.295125900692839	0.346446355399853	0.453981526951963	5343.45207817947	5365.8631114925	5981.4909487355
Smp_141030	XLOC_034035	epidermal growth factor receptor kinase substrate 8-like	SC_0400	♂	0.246774905144571	N.S.	0.293051120733851	152.237855002737	398.127585038215	137.658037510758
Smp_062950	XLOC_032772	growth factor receptor bound protein 2	SC_0229	♂	0.246531137500556	N.S.	N.S.	1584.6962334776	2141.42075016123	2863.00834906009
Smp_152680	XLOC_032694	epidermal growth factor receptor	SC_0225	♂	0.186361582166786	N.S.	N.S.	73.6786589583573	37.2468809347563	164.781428610369
N.A.	XLOC_034575	Epidermal growth factor receptor - tyrosine kinase	SC_1363	♂	0.15430902763496	0.268478068241996	0.29663579265236	157.706728376156	131.755006749249	231.595411432922	100*
N.A.	XLOC_034752	eps8-related protein	SC_2417	♂	0.0590095589685497	N.S.	0.37545193775996	48.973747182908	31.915800927996	78.1993445279839
Smp_035260	XLOC_003827	epidermal growth factor receptor kinase substrate 8-like protein 1-like	1	♂	0.0506219847334629	N.S.	N.S.	3860.89890966886	3179.89593306663	6702.53640643419
Smp_157070	XLOC_023744	cysteine-rich with egf-like domains protein	PSA4	♂	0.0352914335705531	N.S.	N.S.	1836.15543251013	2377.49303439187	3331.75309199817
Smp_154760	XLOC_005613	egf-like domain protein	1	♂	0.0202272521558145	N.S.	0.451657601786647	11679.1055580906	7345.18835882712	24151.2696219664
N.A.	XLOC_026641	egf-like domain protein	PSA4	♂	0.00680702513193987	N.S.	0.0953043311658602	37.4450697780776	3.91453896520671	45.5601806993801
Smp_165470	XLOC_025923	epidermal growth factor receptor	Z3	♂	N.S.	N.S.	0.42986666478127	2559.76902082437	1558.26390595926	3275.16450395123
FIBROBLAST GROWTH FACTOR (FGF) PATHWAY			#N/A		N.S.	N.S.	N.S.	#N/A	#N/A	#N/A
Smp_052290	XLOC_014800	fibroblast growth factor receptor-like partial	4	♀	6.27729870202353	N.S.	N.S.	229.758934926454	356.197692800333	141.04685448798
Smp_130920	XLOC_000080	extended synaptotagmin-2	1	♂	0.231697370170258	N.S.	0.365264467034023	1236.32212202751	297.096458291835	1599.9651822896
Smp_159520	XLOC_022335	acidic fibroblast growth factor intracellular binding protein	Z1	♂	0	N.S.	N.S.	6.76628020239534	0	7.61988642396223
TUMOR NECROSIS FACTOR (TNF) PATHWAY			#N/A		N.S.	N.S.	N.S.	#N/A	#N/A	#N/A
Smp_168390	XLOC_007273	tnf receptor-associated factor 3	1	♀	26.8690823408557	N.S.	N.S.	450.492604994477	14.0043659071406	42.1999757647119
Smp_060210	XLOC_026774	lipopolysaccharide-induced tumor necrosis factor-alpha factor homolog	PSA4	♀	19.4072854685416	N.S.	N.S.	27.1791883111739	1.82895420035755	4.30335907394131
Smp_196450	XLOC_000550	tnf receptor-associated factor 4	1	♀	18.0435830771317	N.S.	N.S.	574.703977214982	22.7771274769504	73.2537382023958
Smp_060220	XLOC_023893	PREDICTED: Lipopolysaccharide-induced tumor necrosis factor-alpha factor homolog (LPS-induced TNF)	PSA4	♀	N.S.	N.S.	18.0301496664129	22.5227477380207	1441.72596561285	108.224182510842	100*
Smp_022740	XLOC_009446	tumor necrosis factor alpha-induced protein 8-like	2	♀	N.S.	N.S.	4.19916963266486	41.6070330621075	129.794564572352	60.4371884065297
Smp_168070	XLOC_006416	TNFR	1	♂	0.348154270458484	N.S.	N.S.	1465.5790554731	1182.79922649106	2604.95869145704
Smp_025370	XLOC_023606	lipopolysaccharide-induced transcription factor regulating tumor necrosis factor alpha	PSA4	♂	0.337138141662671	N.S.	N.S.	4900.50424779349	4269.19397888859	7158.43692154307
N.A.	XLOC_034449	lipopolysaccharide-induced transcription factor regulating tumor necrosis factor alpha	SC_0735	♂	0.308709033251627	N.S.	N.S.	2844.60317188826	2275.73909895684	4869.84788083694
N.A.	XLOC_026778	lipopolysaccharide-induced transcription factor regulating tumor necrosis factor alpha	PSA4	♂	0.0209582347885751	N.S.	0.145699338919187	121.510549893506	94.0335601714582	85.58865367883
N.A.	XLOC_023899	lipopolysaccharide-induced transcription factor regulating tumor necrosis factor alpha	PSA4	♂	0.0102661198316108	N.S.	N.S.	272.213831938933	486.841209674348	520.679470215802
TRANSFORMING GROWTH FACTOR beta (TGFb) & BONE MORPHEGENTIC PROTEIN (BMP) PATHWAY			#N/A		N.S.	N.S.	N.S.	#N/A	#N/A	#N/A
Smp_144390	XLOC_012174	tgf-beta receptor	3	♀	6.37803729187291	N.S.	N.S.	10622.668644827	3829.81261936898	3666.38751320862
Smp_067260	XLOC_002601	transforming growth factor-beta receptor type i (TGFβ receptor)	1	♀	N.S.	N.S.	3.36361966594296	119.782079095501	750.570122957437	243.832664236698
Smp_123000.2	XLOC_008435	sno and ski oncogene family	2	♀	N.S.	N.S.	2.22900155925273	3215.73765969346	5032.96312405232	5596.28767081243
Smp_165260	XLOC_023167	nedd-4-like e3 ubiquitin-protein ligase	Z3	♂	0.332123812207371	N.S.	N.S.	3125.33916376934	2935.09007047761	3751.03474514545
Smp_157540	XLOC_002824	SmadA protein	1	♂	0.313110641966007	N.S.	N.S.	1941.47429620168	1322.76687119898	3139.92771131556
N.A.	XLOC_029466	zinc finger transcription factor gli2	SC_0113	♂	0.290204989408113	N.S.	N.S.	4114.01971403808	3479.55537808197	6137.78570910799
Smp_212740	XLOC_032435	smad	SC_0218	♂	0.289893843512418	N.S.	N.S.	2512.61963185734	2424.38292664888	4625.63019236246
Smp_076490	XLOC_030562	bone morphogenetic protein antagonist noggin	SC_0149	♂	0.284327809898063	N.S.	N.S.	82.8196870009103	113.883917093031	214.912191615359
Smp_188160	XLOC_029763	mad mothers against decapentaplegic interacting protein	SC_0129	♂	0.259130228425308	N.S.	N.S.	263.126924195242	138.1448178039	316.000872016921
Smp_124450	XLOC_008462	bmp receptor	2	♂	0.243264843714849	N.S.	N.S.	1930.95814722799	2387.87159511391	3225.56435058329
Smp_134430	XLOC_025139	tolloid-like protein partial	Z1	♂	0.129726783194042	N.S.	N.S.	2210.95941861897	1552.52477303285	4821.51701569142
Smp_000530	XLOC_029461	zinc finger transcription factor gli2	SC_0113	Switch	0.0664777455087052	2.18408177496629	0.40162270116606	1884.67556432838	1058.59328553376	3570.03178057238
Smp_123300	XLOC_019070	Follistatin	6	♂	0.0549501690742032	N.S.	0.3143611705385	479.647765384273	143.574231786175	639.911200752269
Smp_099440	XLOC_020169	Noggin like protein	6	♂	0.00986338159390725	N.S.	N.S.	425.374606524637	726.64811884637	1137.16873906778	100*
Smp_070070	XLOC_015527	smad nuclear interacting protein	4	♂	N.S.	0.323754020673505	N.S.	2222.79523226098	3230.23983817369	1923.12610563801
Smp_093740.3	XLOC_025859	hepatocyte growth factor-regulated tyrosine kinase substrate	Z3	♂	N.S.	0.45527318000026	0.490658068468135	8970.25949662848	3491.31442684185	7399.08023308934
Smp_137380	XLOC_004747	smad nuclear-interacting protein 1	1	♂	N.S.	0.472262345637597	N.S.	1097.3459729159	1163.60001707752	770.212022656598
WNT SIGNALLING PATHWAY					N.S.	N.S.	N.S.
Smp_139180	XLOC_006895	frizzled-like receptor	SC_0071	♀	5.10103926146009	N.S.	N.S.	291.859119060926	495.821074255921	179.380244392678
Smp_196930	XLOC_002043	wnt related	1	♀	N.S.	N.S.	2.46736172609412	346.884228592768	1183.53783256883	662.019247189389
Smp_062560	XLOC_017071	wnt inhibitor frzb2	4	♂	0.0965733487653963	N.S.	N.S.	450.450105108313	936.889097780082	1247.7046326262
Smp_145140	XLOC_016991	wingless-type mmtv integration site family member 5	4	♂	0.070889601815174	N.S.	N.S.	761.63821144893	571.553504413981	1565.78305183864
Smp_156540	XLOC_032169	wnt related	SC_0203	♂	0.0453543723643748	N.S.	N.S.	1679.12809467095	1915.15364161829	4389.1392022756
NOTCH SIGNALLING PATHWAY			#N/A		N.S.	N.S.	N.S.	#N/A	#N/A	#N/A
N.A.	XLOC_023829	delta-like protein 1-like	PSA4	♀	Inf	N.S.	N.S.	72.5346676933062	0	0.686087383496795
Smp_122750	XLOC_010628	jagged protein	2	♀	9.66505221655474	N.S.	N.S.	60.2429122723116	18.8307098302641	32.5057702390458
N.A.	XLOC_010626	jagged protein	2	♀	5.27188638283585	N.S.	N.S.	56.0218770435902	25.5250815691097	31.4906448248817
Smp_141250	XLOC_000641	Delta-like protein 1	1	♀	N.S.	5.45069595358459	N.S.	53.2722948592289	82.378299662597	91.7116135248058	100*
Smp_127710	XLOC_021345	neurogenic locus delta protein	7	♂	0.330634439140872	N.S.	N.S.	1102.15781808958	999.734641675401	1373.89083195634
Smp_145970	XLOC_012926	recombining binding protein suppressor of hairless	3	♂	0.185753511765475	N.S.	N.S.	873.293077927457	642.219050292576	1558.67853239793
Smp_128230	XLOC_010435	protein jagged-1b	2	♂	0.163775800686491	N.S.	N.S.	2402.07702991553	838.117520192239	3676.14742982357
Smp_050520	XLOC_017262	neurogenic locus notch homolog protein 2-like	4	♂	0.0708077678811413	N.S.	0.288520772911315	3268.95854555788	152.83903565288	4064.80909205717	100*
Smp_128220	XLOC_008843	neurogenic locus notch homolog protein 2-like	2	♂	0.0297892294367191	N.S.	0.400166174301367	1655.12260893397	296.654561131348	2219.55999199807
Smp_000600	XLOC_029509	notchless homolog 1	SC_0113	♂	N.S.	0.456478825659693	N.S.	1701.66440371278	2817.81585245861	2146.82716061081
BIOSYNTHESIS AND RESPONSE TO HORMONES (33 hits)					N.S.	N.S.	N.S.
Gene ID	RNAseq experiment ID	Predictive product	Chromosomal location	Sex of bias	Fold Change			Expression level average (rpkm)			Specific remarks
					Cercariae	Schistosomula S#2	Adults	Cercariae	Schistosomula S#2	Adults
RECEPTORS					N.S.	N.S.	N.S.
Smp_034860	XLOC_003869	nuclear hormone receptor	1	♀	28.2559382598975	6.30196309666555	N.S.	125.850233181391	119.52186958919	37.0357651946722
Smp_134490	XLOC_021200	thyroid hormone receptor	7	♀	Inf	N.S.	N.S.	6.68631535734215	0	0
Smp_085680	XLOC_019266	atrial natriuretic peptide receptor 2-like	6	♀	75.0454877120968	N.S.	N.S.	93.1363210678627	6.28535436699573	2.43223209585667
Smp_174750	XLOC_010596	coup transcription factor	2	♀	14.4030531432331	N.S.	N.S.	45.7449305453862	11.3978137103607	5.7431362975754
Smp_016180	XLOC_003273	nuclear hormone receptor	1	♀	3.6808798746203	N.S.	N.S.	1471.19791465279	1442.60672408426	938.560788038237
Smp_026160	XLOC_017871	growth hormone inducible transmembrane protein	5	♂	0.30782406811643	0.3114271649338	N.S.	14885.2623371211	23188.8031877401	19331.9324544308
Smp_139200	XLOC_006888	nuclear hormone receptor nor-1	1	♂	0.0673804060465	N.S.	N.S.	272.334741349585	289.086136528065	838.725327020059
Smp_134960	XLOC_012244	peptide (allatostatin somatostatin)-like receptor	3	♂	0.0443007482510082	N.S.	N.S.	283.195593563721	64.8984632470688	333.521734785754
Smp_041540	XLOC_021842	hormone receptor 4	7	♂	0.000630165122026853	N.S.	N.S.	372.390378039721	938.813025502721	791.773449643772
Smp_212440	XLOC_010374	nuclear hormone receptor	2	♂	0	N.S.	N.S.	14.1751162502281	3.68581631156567	26.3434905755331
Smp_212430	XLOC_010372	nuclear hormone receptor	2	♂	0	N.S.	N.S.	30.5539028448746	10.6140521222936	67.6108263209216
Smp_086190	XLOC_008361	progestin and adipoq receptor family member vi	2	♂	N.S.	0.380133453992418	N.S.	5346.35530253261	6361.81972974217	5412.91961350626
Smp_174700	XLOC_018872	hepatocyte nuclear factor 4-alpha (hnf-4-alpha)	6	♂	N.S.	N.S.	0.115330625162899	92.6314081378115	19.5785495005166	103.214575076653
STEROID PATHWAY			nd		N.S.	N.S.	N.S.	#N/A	#N/A	#N/A
Smp_156400	XLOC_002643	cytochrome p450	1	♀	10.7030959957378	N.S.	N.S.	389.383649161322	1.55991262578518	29.0011386107542
Smp_033930	XLOC_034712	phosphatidylcholine transfer protein	SC_2144	♀	7.3345775791224	N.S.	N.S.	602.408538961681	35.4341690293966	115.721449277715
Smp_058980.2	XLOC_016831	oxysterol-binding protein 1	4	♂	0.278793970643903	N.S.	N.S.	6737.61805786607	6254.989342324	10359.562383985
Smp_144850	XLOC_021589	oxysterol-binding protein 1	7	♂	0.258368903476073	N.S.	0.503347616062136	3109.09764351337	1287.20961428512	4102.6704623439
Smp_011000	XLOC_019699	lipase 1 sterol esterase 1 sterol esterase 2	6	♂	0.0587865802376259	N.S.	N.S.	747.945652302143	273.641022415457	1188.84275860661
Smp_168560	XLOC_014202	steroid dehydrogenase	3	♂	0.0530398958578747	N.S.	N.S.	2416.40975701608	1311.67935340442	3430.71396229047
Smp_134390	XLOC_022289	sterol o-acyltransferase 1	Z1	♂	0.0418297842431369	N.S.	N.S.	254.147753750463	52.3228377708249	374.315301166505
Smp_031180	XLOC_022172	phosphatidylcholine-sterol acyltransferase (lecithin-cholesterol acyltransferase) phospholipase a	Z1	♂	0.0119028582639047	N.S.	N.S.	503.859040977274	813.389486208505	623.57624392649
Smp_166500	XLOC_029395	phosphatidylcholine-sterol acyltransferase (lecithin-cholesterol acyltransferase) phospholipase a	SC_0111	♂	N.S.	0.305358442968205	0.534816119790295	5812.71166307322	4491.60736322311	5290.54652912638
Smp_131430	XLOC_020743	steroid dehydrogenase	6	♂	N.S.	N.S.	0.139715804873685	206.61296115685	56.0785273337654	151.125772208631	100*
Smp_178940	XLOC_019794	steroid dehydrogenase	6	♂	N.S.	N.S.	0.151549927304397	31.3258976889468	4.80742007651675	20.8529001799733
Smp_000340	XLOC_013919	ecdysone-induced protein 78c-like	SC_0044	♂	N.S.	N.S.	0.386736889118346	66.1980387975456	36.4482601617417	112.967140342136
THYROID HORMONES RELATED PROTEINS			nd		N.S.	N.S.	N.S.	#N/A	#N/A	#N/A
Smp_026400	XLOC_027412	thyrotroph embryonic factor related	PSA4	♀	N.S.	N.S.	3.24392995042812	35.1433636092316	323.317601609136	88.9692824326826
Smp_056990	XLOC_001513	thyroid receptor-interacting protein 11	1	♂	0.0523463892371598	N.S.	0.49180423343055	4672.39233545057	813.196816390916	5685.09658403769
Smp_146200.2	XLOC_025340	zyxin trip6 (thyroid receptor-interacting protein 6)	Z1	♂	N.S.	0.337431622140771	N.S.	6552.21801883866	5414.41101466466	6241.27934943896
INSULIN RELATED PROTEINS			nd		#N/A	#N/A	#N/A	#N/A	#N/A	#N/A
Smp_027340	XLOC_017304	insulin-induced gene 1 protein	4	♀	4.44107479867072	N.S.	N.S.	3234.33615595192	1046.20129053552	1055.64248805066
N.A.	XLOC_020824	putative insulin-like growth factor	6	♀	N.S.	N.S.	51.894634685497	0.918558653543692	36.2133972033484	41.0695305694267	100*
Smp_146010	XLOC_008875	insulysin (m16 family)	2	♂	0.32038734972216	N.S.	N.S.	827.73191563098	1068.78488627332	1008.06845548623
Smp_180600	XLOC_007622	insulin-like growth factor binding	2	♂	0.0422765543779286	N.S.	N.S.	5330.45766146779	2239.03070689614	6792.95630587039
Smp_172440	XLOC_004475	insulinoma-associated protein (ia-1)-related	1	♂	0	N.S.	0.0437622111982469	21.5537688883192	1.39113528326189	30.4634443999687

## Sheet: Sheet3 - Sexual identity
SEX DIFFERENTIATION & REPRODUCTION (56 hits)
Gene ID (v5.2)	CuffLinks IDs	Predictive product	Chromosomal location	Sex of bias	Fold Change			Expression level average (rpkm)			Specific remarks
					Cercariae	Schistosomula S#2	Adults	Cercariae	Schistosomula S#2	Adults
SEX DETERMINATION OR SEXUAL DIFFERENTIATION LINKED GENES					#N/A	#N/A	#N/A
Smp_196410	XLOC_000057	dachshund homolog	1	♀	86.5153511090445	N.S.	N.S.	116.55622750894	62.8843820614645	12.0917767362608
Smp_180820	XLOC_004877	sox transcription factor	1	♀	Inf	N.S.	N.S.	13.1302251709244	0	0.257826204022503
Smp_148110	XLOC_025685	transcription factor sox-14	PSA3	♀	15.0568742171484	N.S.	2.68751112179011	1366.01184027046	1821.74615876093	508.544877966494
Smp_155690	XLOC_007516	sox transcription factor	2	♀	13.2869936736026	N.S.	N.S.	85.2920077485627	23.2551600628619	25.0435572192631
Smp_161600	XLOC_014096	sox transcription factor	3	♀	4.96522988199631	N.S.	N.S.	630.485747677984	117.318646501816	266.096834632725
Smp_076600	XLOC_030546	sox transcription factor	SC_0149	♀	N.S.	N.S.	3.13273730289234	55.7208693425393	630.170797999613	136.858829276214
Smp_174880	XLOC_025404	FOG (coiled-coil domain-containing protein 11)	Z2	♂	0.249803584495305	N.S.	N.S.	477.673028266562	142.831034601928	778.576680938805
Smp_103470	XLOC_029759	mago nashi protein homolog	SC_0129	♂	N.S.	0.314173477105459	N.S.	6193.552481824	11099.3582959761	5789.77444774971
Smp_045950	XLOC_026534	TRA-2	PSA4	♂	N.S.	0.451146152663752	N.S.	988.492999757757	1321.87660310613	902.874945495658
Smp_006250.2	XLOC_025309	sex comb on midleg homolog	Z1	♂	N.S.	0.318806708077606	N.S.	3173.44726283494	3798.97950481925	3357.85800587032
MEIOSIS LINKED GENES & SPERM RELATED PROTEINS					#N/A	#N/A	#N/A	#N/A	#N/A	#N/A
Smp_162300	XLOC_018910	epididymal sperm-binding protein 1-like	6	♀	3.56425657368372	N.S.	N.S.	372.448336259278	98.5954081776749	204.935389939713
Smp_155280	XLOC_006748	sperm surface protein sp17	1	♀	N.S.	N.S.	2.28718638881775	813.260903692108	375.204143667208	1194.1770838709
Smp_190140	XLOC_013783	radial spoke head 1 homolog	3	♂	0.287092684192933	N.S.	N.S.	857.936652927136	602.845128473798	1996.10926930502
Smp_058320	XLOC_023420	nuclear autoantigenic sperm protein	PSA4	♂	0.268068950053268	N.S.	N.S.	5430.82088775153	10438.9502714151	8813.90650631877
Smp_180580	XLOC_009370	meiosis-specific nuclear structural protein 1	2	♂	0.191745720195161	N.S.	N.S.	165.185188860589	141.872072989768	374.67075091758
Smp_141420	XLOC_027568	spermatogenesis-associated protein 17-like	PSA4	♂	0.156418175050545	N.S.	N.S.	170.148703447685	156.142956659556	421.468155850455
N.A.	XLOC_031194	meiosis expressed gene 1 protein homolog	SC_0169	♂	0.122127222042121	N.S.	N.S.	316.849053924746	259.742362585354	560.919351583743
Smp_060160	XLOC_023917	sperm flagellar protein 1	PSA4	♂	0.118157756781666	N.S.	N.S.	314.254265621011	330.945743539715	771.357301296369
Smp_170600	XLOC_002867	sperm associated antigen 8	1	♂	0.104223102540249	N.S.	N.S.	318.655509153472	308.726592179629	745.096765785286
N.A.	XLOC_011454	meiosis-specific with ob domain-containing protein isoform x2	3	♂	0.0548970083567935	N.S.	N.S.	9.72964824203287	0.319822677334568	15.6888808361081
N.A.	XLOC_011455	meiosis-specific with ob domain-containing	3	♂	0.0170317172361507	N.S.	N.S.	15.117564139298	4.58514729321273	20.5158023725482
Smp_162740	XLOC_012817	meiosis-specific with ob domain-containing	3	♂	0.0129993326421353	N.S.	N.S.	18.2754182308294	1.05677295416503	23.0108154455678
Smp_144860	XLOC_021172	boule-related protein	7	♂	0.0052089076304539	N.S.	N.S.	94.1130481720499	11.5314026034901	181.6104409155
N.A.	XLOC_027516	meiotic checkpoint regulator	PSA4	♂	0	N.S.	N.S.	5.84017569641625	7.48680782557147	4.47979601636225
EGG ANTIGENS					#N/A	#N/A	#N/A	#N/A	#N/A	#N/A
Smp_173350.2	XLOC_032382	egg protein cp391s-like	nd	♀	Inf	N.S.	N.S.	21.3276519596839	0.945801568415864	0
Smp_202840	XLOC_018237	egg protein cp391s-like	nd	♀	Inf	N.S.	N.S.	20.7546190959476	3.41358116789843	0.209585318764443
N.A.	XLOC_018732	egg protein cp391s-like	nd	♀	Inf	N.S.	N.S.	8.50653275183656	2.15337488552296	0
Smp_155170	XLOC_018737	egg protein cp391s-like	nd	♀	Inf	N.S.	N.S.	8.0002003074176	0.97347522005932	0.266916745967908
N.A.	XLOC_018239	egg protein cp391s-like	nd	♀	Inf	N.S.	N.S.	7.54980760386631	0.848209154417085	0.476502064732352
N.A.	XLOC_014674	egg protein cp391s-like	nd	♀	Inf	N.S.	N.S.	6.61172903618527	0	0
N.A.	XLOC_014692	egg protein cp391s-like	nd	♀	67.8930986314468	N.S.	N.S.	127.084560990799	9.20257695856186	4.27299887312884
Smp_133400	XLOC_029110	egg protein cp391s-like	nd	♀	62.6438527100409	N.S.	N.S.	543.619058361107	0.577038938163183	5.43084526110222
Smp_202850	XLOC_018263	egg protein cp391s-like	nd	♀	54.5744733282125	N.S.	N.S.	131.016198812162	6.71885205543589	3.98215109386539
N.A.	XLOC_018733	egg protein cp391s-like	nd	♀	48.3180712650682	N.S.	N.S.	25.2915718163954	0.319822677334568	1.04948589998082
Smp_163060	XLOC_006850	egg protein cp391s	nd	♀	25.3071013141507	N.S.	N.S.	228.750727873155	31.2081834469729	12.9214019376501
Smp_205310	XLOC_033580	egg protein cp391s-like	nd	♀	15.3452636299961	N.S.	N.S.	13.3869648507107	0.790445717611193	0.686087383496795
Smp_202700	XLOC_016919	egg protein cp391s-like	nd	♀	13.8569482639954	N.S.	N.S.	10.6890554208278	2.16219836941073	3.5675499182496
N.A.	XLOC_029169	egg protein cp391s-like	nd	♀	4.47201971389062	N.S.	N.S.	44.3543508334924	6.82716233579687	27.4875880287338
Smp_148530	XLOC_002370	major egg antigen	nd	♀	3.90890810439984	N.S.	N.S.	51.7401938338591	6.8255554451599	14.8666873409947
N.A.	XLOC_005453	major egg antigen	nd	♀	3.59522637178089	N.S.	N.S.	1313.13843808755	323.728995533339	515.823932649344
Smp_049240	XLOC_002366	major egg antigen	nd	Switch	3.1515487098102	N.S.	0.466995472300793	466.036234429069	107.613229235577	189.21247461728
Smp_150240	XLOC_011805	secretory glycoprotein k5 precursor	nd	♀	N.S.	N.S.	29.5621012993766	12.7344596313915	10.9414416168638	15.8046801465159
N.A.	XLOC_014239	egg protein cp391s-like	nd	♂	0.21325218079343	N.S.	N.S.	735.431879100267	1432.21510309524	799.151994188543
Smp_049300.3	XLOC_002376	major egg antigen	nd	♂	0.0730690492788812	N.S.	0.227421397114602	404.905787257173	141.369492804821	596.674406276064
Smp_049270	XLOC_002372	major egg antigen	nd	♂	0.0386216162326983	N.S.	0.500220355433153	17887.672317483	23402.1593075378	29651.0949696928
N.A.	XLOC_014709	egg protein cp391s-like	nd	♂	0	N.S.	N.S.	7.08755812511403	0	9.92716787607577
N.A.	XLOC_007178	egg protein cp391s-like	nd	♂	0	N.S.	N.S.	9.47523034160337	0	10.3219334825212
N.A.	XLOC_007179	egg protein cp391s-like	nd	♂	0	N.S.	N.S.	10.9910697259721	0.667606498150039	16.2743546994159
N.A.	XLOC_007151	egg protein cp391s-like	nd	♂	0	N.S.	0.0222253670130786	30.0425279044603	4.4650224117701	21.9160609458951
N.A.	XLOC_033224	egg protein cp391s-like	nd	♂	N.S.	0.0319248538305216	N.S.	0.918558653543692	13.4830480171833	0
Smp_049230	XLOC_005452	major egg antigen	nd	♂	N.S.	0	0.0124996559574741	918.75845097076	26.3142222400189	441.551753469853
N.A.	XLOC_033223	egg protein cp391s-like	nd	♂	N.S.	0.057619349204431	N.S.	0.506332444418957	11.4847414906276	1.29970244899477
N.A.	XLOC_002369	major egg antigen	nd	♂	N.S.	0.326281458813692	N.S.	9733.9916657645	9021.23092182745	10766.5936242778
N.A.	XLOC_007176	egg protein cp391s-like	nd	♂	N.S.	N.S.	0.0162261880253412	6.54603781937542	0	13.1260705978161
Smp_048050	XLOC_002367	major egg antigen	nd	♂	N.S.	N.S.	0.022115047184444	108.400749401714	2.95564591687791	31.7096424215977
Smp_136930	XLOC_015905	major egg antigen	nd	♂	N.S.	N.S.	0.409843766207973	5168.76807979345	514.2401838934	3434.9108929357

## Sheet: Sheet4 - NervousSystem
NERVOUS SYSTEM (85 hits)
Gene ID (v5.2)	CuffLinks IDs	Predictive product	Sex of bias	Fold Change			Expression level average (rpkm)			Specific remarks
				Cercariae	Schistosomula S#2	Adults	Cercariae	Schistosomula S#2	Adults
CHOLINERGIC SYSTEM				#N/A	#N/A	#N/A
N.A.	XLOC_021266	nicotinic acetylcholine receptor alpha subunit precursor	♀	Inf	N.S.	N.S.	17.6499240101166	3.03168453776458	1.6735939751393
N.A.	XLOC_009714	acetylcholine receptor	♀	Inf	N.S.	N.S.	7.37122770281371	0.843653666554472	0.735809155691705
N.A.	XLOC_008521	acetylcholine receptor	♀	Inf	N.S.	N.S.	6.84624867810553	0.159911338667284	0
N.A.	XLOC_031999	acetylcholine receptor	♀	Inf	N.S.	N.S.	6.30262307310813	0.347783820815472	0
N.A.	XLOC_006908	acetylcholine receptor	♀	61.5128132516723	N.S.	N.S.	70.3392976287649	2.71186186043001	0.467411522786947
Smp_212180	XLOC_025010	choline dehydrogenase	♀	24.0689808174028	N.S.	N.S.	72.1450248165099	1.01539031896551	4.65914793541678
Smp_125350	XLOC_001830	acetylcholinesterase partial	♀	15.5779704107763	N.S.	2.80589438638171	717.161433885076	186.926874211172	205.635531962655
Smp_150520	XLOC_018402	high-affinity choline transporter	♀	8.09876185418478	N.S.	N.S.	195.97529434636	89.5641757889315	79.992169008531
Smp_212090	XLOC_007797	acetylcholine receptor	♀	7.95999438851033	N.S.	2.30164129745859	342.483689472031	110.127259873797	157.016193509192
N.A.	XLOC_001261	acetylcholine receptor	♀	5.91681573116212	N.S.	N.S.	39.8112588789013	22.624676490258	24.872253848566
Smp_146910	XLOC_026548	choline acetyltransferase	♀	3.98151718067765	N.S.	N.S.	546.455059078361	326.034747062249	448.733875499281
N.A.	XLOC_014475	acetylcholine receptor	♀	N.S.	8.77127984517481	N.S.	21.9898248036958	24.9622405791376	40.1731742986632
Smp_046120	XLOC_026550	vesicular acetylcholine transporter	♀	N.S.	N.S.	2.05458117343799	310.173655425492	621.305309002612	446.327924183303
N.A.	XLOC_016833	nicotinamide riboside kinase 1	♀	N.S.	N.S.	7.50423410274311	1.47896374323046	9.90787210045779	37.3877890288086
Smp_154600	XLOC_006785	acetylcholinesterase	♂	0.246510494818379	N.S.	N.S.	4035.08854729477	2249.82894629014	6656.83078910248
Smp_160740	XLOC_002110	choline transporter-like protein 2	♂	0.23478474351255	N.S.	N.S.	2789.76955845432	2835.30142808376	4089.46850564994
Smp_132070	XLOC_026324	nachr subunit	♂	0.203300728024867	N.S.	N.S.	3018.62219397687	2966.52199427199	5561.35203606759
Smp_205770	XLOC_034341	choline transporter-like protein 2	♂	0.155923465460452	N.S.	0.479289697782625	238.97342008198	246.395930808539	412.00076230527	100*
N.A.	XLOC_014385	cholinesterase (s09 family) gliotactin septate junction protein	♂	0.0975405121792113	N.S.	N.S.	253.595826973642	776.587268658453	503.439730331897
Smp_101990	XLOC_009427	neuronal acetylcholine receptor subunit alpha-6	♂	0.0905761459055082	N.S.	N.S.	38.0554163953023	67.0227826806817	38.878193799635
Smp_015030	XLOC_012478	choline ethanolamine kinase	♂	0.0572357209646396	N.S.	N.S.	833.245030960533	603.297268407089	1111.51825783431
N.A.	XLOC_002446	acetylcholine receptor	♂	0	N.S.	0	11.9247200843866	0.785602737911133	6.46194485686794
GLUTAMATERGIC SYSTEM				#N/A	#N/A	#N/A	#N/A	#N/A	#N/A	100*
Smp_021460	XLOC_029791	glutamine synthetase bacteria	♀	19.8751925333993	N.S.	N.S.	61.8389041110717	4.28897524336567	2.30539012452809
Smp_048040	XLOC_010587	vesicular glutamate transporter 2	♀	5.02598373830614	N.S.	N.S.	328.305856021706	61.6614274776851	159.49400004878
Smp_023290	XLOC_013599	glutamate receptor ampa	♀	3.34418770039175	N.S.	N.S.	164.82522371555	42.4863512729255	84.6225901181256
Smp_145020	XLOC_015733	glutamate semialdehyde dehydrogenase	♀	N.S.	N.S.	59.9774336946114	9.0706317270037	3.29558492813734	15.8118809455166	100*
Smp_140920	XLOC_000964	glutamate receptor kainate	♀	N.S.	N.S.	3.21670820561162	109.551982325139	92.3873101623817	176.74101730171
Smp_030150	XLOC_012136	homer protein homolog 2	♂	0.225567454338577	N.S.	N.S.	1925.02965451791	1560.11232732035	3186.38677931992
Smp_126350	XLOC_022228	nmda-type glutamate receptor subunit 1	♂	0.190778127243734	N.S.	N.S.	4136.99847344271	3417.72858212091	6217.57239525815
Smp_155120	XLOC_008368	synaptic ras gtpase activating syngap	♂	0.190000341563984	N.S.	N.S.	555.626746780224	411.822751786605	1056.60791939724
Smp_013860	XLOC_010918	glutamate-cysteine ligase catalytic subunit	♂	0.155912968863128	N.S.	N.S.	4200.06147263707	899.667751181437	4969.48621349462
Smp_153780	XLOC_022443	glutamate receptor ionotropic kainate 3	♂	0.084491174431473	N.S.	N.S.	2982.39712638041	2285.70877080847	6374.92974062956
Smp_128940	XLOC_004120	metabotropic glutamate receptor	♂	0.0582556679929627	N.S.	0.324005590417555	1032.11834369011	421.187403246856	1018.36148736925
Smp_128380	XLOC_022891	glutamate synthase	♂	N.S.	0.468655123071869	N.S.	8532.72691490732	4572.70266604923	8833.18847556791
Smp_212200	XLOC_029742	glutamate receptor ampa	♂	N.S.	0.392087725440346	N.S.	2416.03703272334	1980.33781925411	2869.13787920964
Smp_022660	XLOC_009441	glutamate-rich wd repeat-containing protein 1-like	♂	N.S.	0.385603235550479	0.443558356225235	1700.15590545047	1782.34342625851	1886.37619263527
Smp_159650	XLOC_030885	n-methyl-d-aspartate receptor-associated	♂	N.S.	N.S.	0.450180272657726	244.636130078845	97.521632961082	249.264763703055
N.A.	XLOC_030883	n-methyl-d-aspartate receptor-associated	♂	N.S.	N.S.	0.239530472115948	29.2495117048234	5.68810334230912	37.1818148909607
MONOAMINES SYSTEM			#N/A	#N/A	#N/A	#N/A	#N/A	#N/A
Smp_176980	XLOC_012421	beta-arrestin 1	♀	214.716783143124	N.S.	N.S.	221.250197865319	1.26533675391298	1.76098520371001
Smp_180140	XLOC_001785	amine gpcr	♀	41.5339583778033	N.S.	N.S.	26.046623691599	0.507695159482756	2.07614283493598
Smp_199260	XLOC_033067	vesicular amine transporter	♀	19.8475814102561	N.S.	3.93908995878255	1734.80188753915	1480.7220835566	493.393251895219
Smp_202470	XLOC_015056	amine gpcr	♀	7.54258612357027	N.S.	N.S.	882.317543938755	164.995009717704	211.871565130421
Smp_174920	XLOC_022585	tryptophan 5-hydroxylase 2	♀	6.13816994898417	N.S.	N.S.	849.752468982628	685.985180356198	295.397085790102
Smp_087940.2	XLOC_019179	gamma-aminobutyric acid receptor-associated 2	♀	5.54198594488851	N.S.	N.S.	30277.6769920357	8144.29064893088	9538.47115551031
N.A.	XLOC_006375	dopamine-beta-monooxygenase	♀	4.14789292142926	N.S.	N.S.	38.5746603737114	8.87034327114654	17.3021348129301
Smp_043260	XLOC_016754	biogenic amine receptor	♀	N.S.	N.S.	3.73647664945704	17.2591214857914	29.4585039565651	53.8515041474592
Smp_199090	XLOC_032194	peptidyl-glycine alpha-amidating	♂	0.250690777118177	N.S.	N.S.	915.690572355852	1339.74487805778	1599.38883325062
Smp_156530	XLOC_010028	peptidyl-glycine alpha-amidating monooxygenase	♂	0.162858419299472	N.S.	N.S.	677.625563052225	791.97626867822	1129.55223303694
Smp_171580	XLOC_011004	dopa partial	♂	0.11997225282692	N.S.	N.S.	512.437005818598	450.595463187293	869.690326229129
N.A.	XLOC_033068	Vesicular monoamine transporter	♂	0.111347687388522	N.S.	N.S.	180.470944284056	173.977568688696	577.92336295324	100*
Smp_042400	XLOC_015546	armet-like protein precursor	♂	0.0454279434623475	N.S.	N.S.	3680.96445001611	6382.20780567937	5512.63403955418
Smp_137310	XLOC_006242	amine gpcr	♂	0.0365760736068379	N.S.	0.185350259487745	13.8211526919787	15.0200011979753	19.6242675812622
Smp_137300	XLOC_006243	amine gpcr	♂	0.017216137325744	N.S.	0.0770183690809335	72.5882121459033	13.7861066484755	87.1494101174352	100*
N.A.	XLOC_025561	synaptogyrin 3	♂	N.S.	0.423033167758533	N.S.	5314.11758981899	5159.05877853339	5808.53996686454
NEUROPEPTIDE SYSTEM			#N/A	#N/A	#N/A	#N/A	#N/A	#N/A
Smp_159950	XLOC_014079	neuropeptide y	♀	40.6112751373582	N.S.	2.94711113086678	582.188109867747	90.4310078284854	68.3123964985295
Smp_071050	XLOC_002105	sjchgc06632 protein	♀	N.S.	N.S.	2.36411780090762	2716.15993816005	778.739443286353	3124.90592813944
Smp_133550	XLOC_022370	neuropeptide f-like receptor	♂	0.328629765841619	N.S.	0.328433136006932	688.375657408719	96.3819561332709	697.984576695602
Smp_149580	XLOC_028805	fmrfamide receptor	♂	0.198531900544849	N.S.	N.S.	28.0256793423483	15.7418368393686	72.6314293546272
Smp_170810	XLOC_004392	fmrfamide-activated amiloride-sensitive sodium channel	♂	0.16867007005581	N.S.	N.S.	20.4034713280225	28.3496412135005	54.4074990791096
Smp_170020	XLOC_023275	neuropeptide receptor	♂	0.107029121448643	N.S.	0.335538417819642	453.515880904028	172.563979456484	626.567159825158
Smp_131890	XLOC_024926	sodium and chloride dependent glycine transporter	♂	0.0378390262382961	N.S.	0.445528331318813	6906.54428785114	2145.75456300899	11258.7974528585	100*
Smp_124040	XLOC_003497	fmrfamide-activated amiloride-sensitive sodium channel	♂	0.013439091447817	N.S.	N.S.	366.356761265187	143.124642512131	711.734996516843
Smp_134550	XLOC_021598	sjchgc09751 protein	♂	0.0367466360812056	N.S.	0.141006272977055	6852.31529099022	559.862673731413	6032.60736693462	100*
OTHER NERVOUS SYSTEM RELATED PROTEINS			#N/A	#N/A	#N/A	#N/A	#N/A	#N/A
Smp_196680	XLOC_004041	sodium-dependent neurotransmitter transporter	♀	153.507409260941	N.S.	N.S.	79.235362155294	2.78390926446687	1.679722743211
Smp_212550	XLOC_007792	calcium-dependent secretion activator	♀	7.1942621376512	N.S.	1.95989351044075	941.460746811863	275.254180148725	411.769317493723
Smp_144360	XLOC_013490	myelin proteolipid-related	♀	6.32609053368245	N.S.	N.S.	4910.14680839145	1609.34882454002	1924.08695512502
Smp_138460	XLOC_012135	myelin proteolipid-related	♀	5.13719325616929	N.S.	N.S.	498.673210299283	184.220922035723	206.833589571517
Smp_155270	XLOC_006653	regulating synaptic membrane exocytosis protein 2	♀	4.88402294143166	N.S.	N.S.	699.346187095068	183.257127922483	403.592163437483
Smp_137990	XLOC_012783	complexin precursor	♀	4.82023451478361	N.S.	N.S.	337.857890775175	73.8369280978817	155.977529157841
Smp_151430	XLOC_017256	protein piccolo	♀	3.51803188885151	N.S.	N.S.	609.974834289177	295.438471732087	437.802529438534
Smp_173190	XLOC_000882	calcium-dependent activator protein for secretion	♀	3.34096051112931	N.S.	N.S.	1901.47981995951	731.469652948788	1121.43003209987
Smp_055260	XLOC_000922	sodium-dependent neurotransmitter transporter	♀	N.S.	N.S.	18.9403048680854	15.9383847013474	19.099241248919	118.570884264324	100*
Smp_166970	XLOC_008281	neuroligin-4 x-linked protein	♀	N.S.	N.S.	4.36733242593401	17.5383225485052	12.0941575744224	40.2902976575644
Smp_158990	XLOC_031108	neuronal calcium sensor 2	♀	N.S.	N.S.	2.32835048755657	81.5537443431787	72.2098762061973	108.351862349639
N.A.	XLOC_008094	protein unc-79 homolog	♀	N.S.	N.S.	2.14107677875362	1721.74010962936	1109.00306315306	1833.70556009685
Smp_134590	XLOC_021175	unc-13 homolog a ( elegans) isoform cra_a	♀	N.S.	N.S.	2.08482415630254	753.451482413939	224.716464153032	845.595668949129
Smp_163650	XLOC_028924	carboxyl-terminal pdz ligand of neuronal nitric oxide synthase isoform 1	♂	0.28351377468894	N.S.	N.S.	145.077455842961	65.3690547140811	305.385919614257
Smp_147470	XLOC_026077	slit and ntrk-like protein 5-like	♂	0.155470447277782	N.S.	N.S.	2616.25724030966	5106.28734346658	4346.33998588373
Smp_144130	XLOC_002960	opioid-binding protein cell adhesion molecule	♂	0.120047578681949	0.401189096343697	N.S.	659.988709982254	630.197718415037	1005.58169676613
Smp_149740	XLOC_028831	alzheimer s disease beta-amyloid related	♂	0.0839765078299031	N.S.	N.S.	1554.54576173481	1679.51925614206	3328.36436721717
N.A.	XLOC_019404	neuronal calcium sensor	♂	0.0751377557213946	N.S.	N.S.	1666.95840344819	1054.25861340267	3663.02341694979
Smp_123860	XLOC_003549	neurexin-2-alpha- partial	♂	0.0684264124503271	N.S.	N.S.	558.672003452671	247.779853980608	1113.51811003957
Smp_187090	XLOC_026287	neuroglobin	Switch	0.0671951679068875	N.S.	2.83094881991589	47.3610633950991	17.830476666704	159.527672702609
Smp_080100	XLOC_017103	synaptophysin (major synaptic vesicle protein p38)	♂	N.S.	0.462088596546136	N.S.	5514.27033868373	5002.05049759372	7218.20689255873
Smp_181250	XLOC_012510	neural cell adhesion molecule 1-a	♂	N.S.	N.S.	0.317304234197735	38.7781571965478	9.16080036626423	67.4156059110788

## Sheet: Sheet5 - Host-PathogenInt.
HOST-PATHOGEN INTERACTIONS (227 hits)
Gene ID (v5.2)	CuffLinks IDs	Predictive product	Chromosomal location	Sex of bias	Fold Change			Expression level average (rpkm)			Specific remarks
					Cercariae	Schistosomula S#2	Adults	Cercariae	Schistosomula S#2	Adults
PEPTIDASES/PROTEASES					#N/A	#N/A	#N/A
N.A.	XLOC_005842	calpain (c02 family)	nd	♀	Inf	N.S.	N.S.	17.8285039111692	0	0.888063047252684
Smp_006520	XLOC_033078	elastase 2b	nd	♀	Inf	N.S.	N.S.	17.6872171706951	0.20856379974795	0.266916745967908
N.A.	XLOC_017378	calpain (c02 family)	nd	♀	Inf	N.S.	N.S.	13.6924973562111	4.2757442777408	2.63272687267571
N.A.	XLOC_001150	family c44 unassigned peptidase (c44 family)	nd	♀	Inf	N.S.	N.S.	8.13072636944214	0.987429175484607	1.97966106441986
N.A.	XLOC_016625	invadolysin (m08 family)	nd	♀	108.105369178725	N.S.	N.S.	1083.98748492877	8.2979023408142	21.6383102417881
Smp_141550	XLOC_019557	peptidase inhibitor 16 precursor	nd	♀	47.472338909542	N.S.	N.S.	10.0162964528395	0	0.259307090959354
N.A.	XLOC_013641	subfamily a1a unassigned peptidase (a01 family)	nd	♀	46.0447075940859	N.S.	N.S.	110.552379148407	7.41983766044179	5.02859680075075
N.A.	XLOC_034044	family c44 unassigned peptidase (c44 family)	nd	♀	39.8957898032092	N.S.	N.S.	16.9013653377191	0.159911338667284	0.735809155691705
N.A.	XLOC_012343	subfamily a1a unassigned peptidase (a01 family)	nd	♀	15.5396336293345	N.S.	N.S.	25.4458449624816	10.5157792384627	1.76542786452057
Smp_085540.5	XLOC_011868	mername-aa213 peptidase (m14 family)	nd	♀	8.75814225899641	N.S.	N.S.	45.1116640786778	10.26845017579	8.11913903449849
N.A.	XLOC_033414	family c44 unassigned peptidase (c44 family)	nd	♀	7.53513963220145	N.S.	N.S.	36.7155995273846	20.5836679297032	12.2702442168788
Smp_129510	XLOC_012870	metallophosphoesterase domain-containing protein 1-like	nd	♀	6.55722913355681	N.S.	3.59352512471533	1116.36196172926	768.295972166175	629.51857505544
Smp_175560	XLOC_010320	cathepsin b-like peptidase (c01 family)	nd	♀	6.51622142829988	N.S.	N.S.	37.7968954819172	21.5618699306432	11.4140222573754
Smp_044250	XLOC_011559	subfamily m67c unassigned peptidase (m67 family)	nd	♀	5.79171105438186	N.S.	N.S.	17644.3822926267	1951.67041529366	3900.00995797855
N.A.	XLOC_012142	family c44 unassigned peptidase (c44 family)	nd	♀	5.33588302887263	N.S.	N.S.	51.5477747862563	31.7177717757849	22.8885429361524
Smp_145930	XLOC_012930	matrix metallopeptidase-7 (m10 family)	nd	♀	5.00631222670387	N.S.	N.S.	653.706463860375	561.277094305558	304.118866721348
Smp_149400	XLOC_019633	furin-1 precursor	nd	♀	4.58342520083307	N.S.	N.S.	1182.60289590591	192.090232069264	341.589948171512
Smp_210510	XLOC_023723	subfamily c1a unassigned peptidase (c01 family)	nd	♀	4.20389142120573	N.S.	N.S.	675.131496383088	92.4676089073031	301.388346907024
Smp_167100	XLOC_029870	peptidase -containing protein	nd	♀	4.16686144708714	N.S.	N.S.	200.699335434279	54.7346689020793	72.5395111109935
Smp_174530	XLOC_005247	Aminopeptidase N	nd	♀	4.02322393683686	N.S.	88.5322137383864	45.8307348808979	3.81514792133208	509.698736930326	100*
Smp_175340	XLOC_009674	adam 17-like protease-like	nd	♀	4.02163613248547	N.S.	N.S.	3545.16211766731	1357.35580441099	1636.64195775921
N.A.	XLOC_028254	family a2 unassigned peptidase (a02 family)	nd	♀	3.63393415578193	N.S.	N.S.	412.809109055908	55.4671508265937	141.062739187363
Smp_091470	XLOC_005581	cytosol alanyl aminopeptidase (m01 family)	nd	♀	2.73480539617585	N.S.	N.S.	8737.41631251567	6675.29190511918	4686.46315243415
N.A.	XLOC_018624	family c44 unassigned peptidase (c44 family)	nd	♀	N.S.	7.97129772295714	N.S.	18.0676480403902	28.5752745710588	39.6956141971517
Smp_125080	XLOC_030467	cytosolic carboxypeptidase 4	nd	♀	N.S.	4.04097739299381	N.S.	1288.63436225434	295.672767001707	770.183384085196
Smp_139160	XLOC_006825	cathepsin a	nd	♀	N.S.	3.34169497486817	N.S.	16861.9422801618	6527.18713698918	17047.0599385802
Smp_129230	XLOC_031750	Serine protease	nd	♀	N.S.	N.S.	5.15549694560579	505.246469252763	752.266197525486	827.653459800321	100*
Smp_088270	XLOC_033292	subfamily m14a unassigned peptidase (m14 family)	nd	♀	N.S.	N.S.	2.36123437420783	1546.74619076063	1168.736786802	2573.10216817809
Smp_127740	XLOC_020924	adam (a disintegrin and metalloprotease	nd	♀	N.S.	N.S.	2.09712045605111	838.545760405814	1881.174102874	1705.2934868312
Smp_061510	XLOC_018289	Nardilysin (m16 family)	nd	♂	0.344524379617656	N.S.	N.S.	1616.17768601075	2155.62395488208	2402.26106929126	qPCR
Smp_154140	XLOC_018623	membrane-bound transcription factor site-1 protease	nd	♂	0.33834339409495	N.S.	N.S.	1350.3865311834	715.360020529974	1646.47431609085
Smp_085110.2	XLOC_011694	dihydropyrimidinase (m38 family)	nd	♂	0.335774191943528	N.S.	N.S.	14261.8475367524	16127.7456850775	19587.6078855983
Smp_153960	XLOC_016857	subfamily a22a unassigned peptidase (a22 family)	nd	♂	0.331491672367473	N.S.	N.S.	5242.44162690365	6048.0087461837	7309.26606616231
N.A.	XLOC_002808	calpain (c02 family)	nd	♂	0.313203236297186	N.S.	N.S.	5812.98101348649	3784.48099363223	7509.02947981955
Smp_078780	XLOC_012956	dihydropyrimidinase related protein-1 (m38 family)	nd	♂	0.31202049527125	0.327700653529367	N.S.	4716.54319365061	7047.60469608587	5701.36323530069
Smp_210730	XLOC_013776	prolyl endopeptidase	nd	♂	0.305793208761128	N.S.	N.S.	2888.58911121017	3064.15480346219	4714.69895381612
Smp_014280	XLOC_004028	mername-aa213 peptidase (m14 family)	nd	♂	0.296897147089682	N.S.	N.S.	1205.76866481621	995.324658875269	1730.44246731909
Smp_043990	XLOC_010377	basigin related	nd	♂	0.28878036838576	0.438447498929775	N.S.	10853.4661874115	8591.79781778186	15663.6537643169
Smp_019010	XLOC_013677	dipeptidyl-peptidase iii (m49 family)	nd	♂	0.284696752975653	0.335070795780209	N.S.	6640.0906307244	17933.1859744902	10063.0933363095
Smp_083870	XLOC_013889	aminopeptidase (m17 family)	nd	♂	0.284213351898123	N.S.	N.S.	9918.09467612757	16277.6611351604	14848.8373395012
Smp_157500	XLOC_002811	calpain (c02 family)	nd	♂	0.272451955754718	N.S.	N.S.	16681.9044813388	24666.8229663091	21965.764820912
Smp_120900	XLOC_034054	o-sialoglycoprotein endopeptidase	nd	♂	0.270150895197441	0.312495584534436	N.S.	243.612709750273	618.964031264056	354.911397828526
N.A.	XLOC_022898	prolyl endopeptidase	nd	♂	0.269442251842504	0.323454421598987	0.392914804690852	7744.17080513655	6797.80521454789	8627.2287338913
Smp_196810	XLOC_003117	dihydropyrimidinase related protein-3 (m38 family)	nd	♂	0.255007905735118	N.S.	N.S.	559.016164371488	171.853440910051	876.497066597234
Smp_135530	XLOC_016626	Leishmanolysin-like peptidase (m08 family)	nd	♂	0.243322283914331	N.S.	0.134711401394198	1081.89408488056	50.141245258526	733.012185748073	100*
Smp_063180	XLOC_020530	pppde peptidase domain containing 2	nd	♂	0.228938062199994	N.S.	N.S.	4234.20973914289	3741.64242917766	6338.83963150672
Smp_125070.2	XLOC_028764	calpain (c02 family)	nd	♂	0.227973441795283	N.S.	N.S.	1488.47951198569	1004.78032345988	2224.71009621202
Smp_013040	XLOC_013105	cathepsin d (lysosomal aspartyl protease)	nd	♂	0.220002121389641	N.S.	0.494018491395533	17944.7582308472	11831.9825829466	19680.978440003
Smp_203480	XLOC_022713	ufm1-specific protease 2	nd	♂	0.199732994146631	0.28977249298141	0.416402572661362	2432.05320092751	2680.36847413927	2624.54901060963
Smp_082620	XLOC_010022	Caax prenyl protease 1 homolog	nd	♂	0.196781861206636	N.S.	N.S.	3897.83769529038	7280.4744004983	5305.48358584597	qPCR
Smp_157400	XLOC_010231	family m13 unassigned peptidase (m13 family)	nd	♂	0.182166967109826	N.S.	N.S.	243.621502519621	591.334692614363	420.865602329865
Smp_034410	XLOC_007765	cathepsin f (c01 family)	nd	♂	0.177167561687384	N.S.	0.53820748365341	21975.5375906237	5917.87196058489	28388.1187231633
N.A.	XLOC_019734	tripeptidyl-peptidase ii (s08 family)	nd	♂	0.175667279436771	N.S.	N.S.	25.8614249092744	18.0666513859482	36.0537806371802
Smp_174540	XLOC_005249	Aminopeptidase N	nd	♂	0.152079428161059	N.S.	N.S.	837.090808833633	736.462362807891	1667.53139546848
Smp_017860	XLOC_023497	metallo phosphoesterase related	nd	♂	0.146947234223781	N.S.	N.S.	200.494501216717	232.423532733427	352.797162951222
Smp_194090	XLOC_033174	subfamily s1a unassigned peptidase (s01 family)	nd	♂	0.134705337090228	N.S.	N.S.	6615.71759264063	1355.75665296465	8413.30440472417
Smp_127030	XLOC_016494	leishmanolysin-like peptidase	nd	♂	0.110089942135033	N.S.	N.S.	178.269217374623	192.301912781181	375.91062695679	qPCR
Smp_173030	XLOC_005254	Aminopeptidase N	nd	♂	0.109845636763656	N.S.	N.S.	436.845144794164	309.518080168552	848.88118330918	100*
Smp_047460	XLOC_007847	metallopeptidase (m12 family)	nd	♂	0.109490130090846	N.S.	N.S.	1963.77066525933	414.638139556294	2827.58260879015
Smp_029500	XLOC_014389	thimet oligopeptidase (m03 family)	nd	♂	0.100442976092122	N.S.	N.S.	4736.577986504	9142.86343198064	7492.72436699877
N.A.	XLOC_018112	Nardilysin (m16 family)	nd	♂	0.0688118539075468	N.S.	N.S.	144.792397110323	42.2133826608375	241.093913310729
Smp_134210	XLOC_024990	peptidase inhibitor 16	nd	♂	0.0649027484741209	N.S.	0.243703906991721	1067.90913234789	350.064432369797	1367.7281927977
N.A.	XLOC_012342	subfamily a1a unassigned peptidase (a01 family)	nd	♂	0.062337984075571	N.S.	N.S.	105.316697142106	222.240904861096	92.644454953511
Smp_156960.2	XLOC_018114	Nardilysin (m16 family)	nd	♂	0.058210375268736	N.S.	0.462794615630029	2295.62284547188	847.968101032294	4051.235647363
N.A.	XLOC_018113	Nardilysin (m16 family)	nd	♂	0.0488280704273568	N.S.	0.439481729333213	1600.51825475187	491.961022735885	2333.89412886269
Smp_163970	XLOC_020786	family s10 unassigned peptidase (s10 family)	nd	♂	0.0467362897359827	N.S.	N.S.	682.866888983127	888.077554860213	1062.52815797835
Smp_157440	XLOC_010238	family m13 unassigned peptidase (m13 family)	nd	♂	0.0383417633262221	N.S.	N.S.	20.5681511838957	14.5198633562111	45.5157730621665
Smp_170480	XLOC_010242	family m13 unassigned peptidase (m13 family)	nd	♂	0.0271554171126959	N.S.	N.S.	9.57602880829423	9.79618722442516	21.4625993147194
N.A.	XLOC_025078	family a2 unassigned peptidase (a02 family)	nd	♂	0.0177071105719429	N.S.	N.S.	69.5378867968767	16.9180979382574	59.8319691611214
Smp_132480	XLOC_013644	subfamily a1a unassigned peptidase (a01 family)	nd	♂	0.011505682914543	0.352154515122055	N.S.	2245.85160303156	6829.72032038517	3309.48405741609
Smp_084450	XLOC_025689	o-sialoglycoprotein endopeptidase	nd	♂	0.00837830466383348	N.S.	N.S.	180.57604842295	38.7698169598922	127.510793830426
Smp_139240	XLOC_006812	cathepsin a	nd	♂	0.00773711752767937	N.S.	0.327763440443515	7186.41017120359	1087.66677930636	6381.60848755453
Smp_153930	XLOC_015382	Leishmanolysin-like peptidase (m08 family) / Invadolysin	nd	♂	0.00452916073953875	N.S.	0.0506002028640617	644.851698825228	6.22080033538503	611.0555902989	100* & qPCR
Smp_002150	XLOC_019050	mastin precursor	nd	♂	0.00343531374127849	N.S.	N.S.	10486.0114176158	1573.78588172485	14515.2194737476
Smp_141610	XLOC_016193	cathepsin b	nd	♂	0.00165526125709896	N.S.	0.385599902393273	63675.4877557488	7804.60017113264	87865.2670882143
Smp_004820	XLOC_008830	microsomal signal peptidase 12 kda -containing protein	nd	♂	N.S.	0.483294921938172	N.S.	3509.76797040312	4045.53024374657	3772.71119932414
Smp_054310	XLOC_026760	s2p peptidase (m50 family)	nd	♂	N.S.	0.441309310899819	N.S.	2115.29838415806	2724.29366230635	2499.32617804351
Smp_085300	XLOC_007126	heparin binding protein	nd	♂	N.S.	0.433880618529678	N.S.	5394.16641058676	15236.795775354	6793.07331956646
Smp_024390.3	XLOC_026692	signal peptidase complex subunit 2 homolog	nd	♂	N.S.	0.403887320639712	N.S.	2818.49424913239	5878.64991342247	3117.24385438366
Smp_032420	XLOC_027191	rhomboid-7 peptidase (s54 family)	nd	♂	N.S.	0.40138778998713	N.S.	1736.46811404743	4354.50655184889	2272.26434467957
Smp_031730	XLOC_021682	sec11-like 3	nd	♂	N.S.	0.384090226570751	N.S.	1931.73257159488	3669.9484693517	1984.6260337475
Smp_091770	XLOC_006754	PREDICTED: matriptase-like	nd	♂	N.S.	0.380724217337452	0.365752750568852	1731.15586696751	989.902938360873	1694.24764291171
Smp_059660	XLOC_020474	metallo-beta-lactamase domain-containing protein 1	nd	♂	N.S.	0.368678535381236	N.S.	6103.62024483175	12768.7488712279	9392.21152458075
Smp_136730	XLOC_012311	cathepsin d (lysosomal aspartyl protease)	nd	♂	N.S.	N.S.	0.484159136116616	7111.83589535635	1074.18718756084	5965.8971888642
Smp_159120	XLOC_023194	family c48 unassigned peptidase (c48 family)	nd	♂	N.S.	N.S.	0.474973651745192	1508.98059889722	1068.31938944306	1388.84664113865
Smp_146730	XLOC_018523	a disintegrin and metalloproteinase with thrombospondin motifs 2	nd	♂	N.S.	N.S.	0.438450962600168	1588.74317943488	226.590959265902	1612.68630009314
N.A.	XLOC_022715	2 peptidase (c78 family)	nd	♂	N.S.	N.S.	0.417377063777161	369.241768652184	250.200559538571	296.110545098117
Smp_145890	XLOC_012945	adamts (a disintegrin and metalloprotease	nd	♂	N.S.	N.S.	0.368290270934527	5038.93117137112	525.168744918964	4376.13897268182
Smp_149730	XLOC_028833	cathepsin a	nd	♂	N.S.	N.S.	0.343476176643722	138.982561596149	85.2588819113848	54.8698284040745
N.A.	XLOC_014078	calpain (c02 family)	nd	♂	N.S.	N.S.	0.238979258256282	23.66925221924	8.17691498385923	34.2884736387315
Smp_085010	XLOC_003240	Cathepsin B	nd	♂	N.S.	N.S.	0.210081609945939	6924.26410860294	1552.19794081369	5354.92382767998	100*
Smp_103610	XLOC_000051	cathepsin b-like peptidase (c01 family)	nd	♂	N.S.	N.S.	0.199097448583122	62088.1187963524	16844.3189412348	60194.0418956889
Smp_085180	XLOC_000548	Cathepsin B	nd	♂	N.S.	N.S.	0.172684892303408	1008.44101993513	216.387159907127	742.763875019011	100*
Smp_141270	XLOC_000628	subfamily c14a unassigned peptidase (c14 family)	nd	♂	N.S.	N.S.	0.139305862459482	49.5014693876205	20.4431710298044	32.1141461661191
Smp_187140	XLOC_006840	Cathepsin L	nd	♂	N.S.	N.S.	0.0800715425127065	7835.63174014918	424.905875164457	6389.43248092333	100*
PROTEASES INHIBITORS					#N/A	#N/A	#N/A	#N/A	#N/A	#N/A
Smp_179120	XLOC_007754	vestiginin-2 precursor	2	♀	Inf	N.S.	N.S.	25.4048439971643	0	0
Smp_062080	XLOC_030816	serine protease inhibitors serpins	SC_0154	♀	72.4189015830092	N.S.	2.30687106018816	9909.20580137964	399.352163098312	255.54384065093
N.A.	XLOC_004873	kunitz domain	1	♀	24.4312927174388	N.S.	N.S.	114.84476881161	11.9955864860918	9.70258522751767
Smp_155560	XLOC_030762	serine protease inhibitors serpins	SC_0154	♀	4.97484222583971	N.S.	N.S.	9390.16900752876	2011.35583212555	3078.46032685736
Smp_076370	XLOC_030146	proteinase inhibitor inhibitor of -containing protein	SC_0138	♂	0.252070229076696	0.402494029261153	N.S.	13302.3182296162	20124.456697048	19482.3269024726
Smp_089670	XLOC_003300	alpha-2-macroglobulin-like protein 1	1	♂	0.21348691646223	N.S.	0.384148088599618	6805.8728954382	1218.15942333627	9791.64895350128
Smp_034420.2	XLOC_009538	proteinase inhibitor -containing protein	2	♂	N.S.	0.437522486086318	0.506751839875777	18412.2764173142	6947.85904341426	18067.5048057862
SECRETED/DELIVERED PROTEINS (ex: Matrix degradation)					#N/A	#N/A	#N/A	#N/A	#N/A	#N/A
Smp_193680	XLOC_020351	venom allergen-like 1 protein	6	♀	Inf	N.S.	N.S.	18.3269504537486	0	0
Smp_001890	XLOC_020039	venom allergen-like 18 protein	6	♀	Inf	N.S.	N.S.	14.6305759238921	0	0
Smp_199890	XLOC_034400	venom allergen-like 7 protein	SC_0670	♀	8.17490073113663	N.S.	N.S.	59.4091859160889	11.3774514254632	13.9126295251409
Smp_133170	XLOC_003908	vasohibin-like protein	1	♀	4.21627667860076	N.S.	N.S.	857.090836854869	168.444778112501	481.919103917472
Smp_206190	XLOC_034628	complement c1q tumor necrosis factor-related protein 3	SC_1586	♀	N.S.	N.S.	3.26094415973261	45.6882120551017	245.932497284845	114.612306721648
Smp_012350.2	XLOC_008239	venom allergen-like 11 protein	2	♂	0.167141239980508	N.S.	N.S.	4031.96807386797	2518.7462892662	5277.57970854086
Smp_132280	XLOC_012691	complement component c8 beta	3	♂	0.102495786055587	N.S.	0.438456095630531	897.084393551847	174.903835758414	1030.37988378734
N.A.	XLOC_034248	suppressor of tumorigenicity 14 protein homolog	SC_0501	♂	0.0756292077491279	N.S.	N.S.	1644.18405878278	450.797969501579	2592.26579331053
Smp_174810	XLOC_031828	extracellular superoxide dismutase	SC_0184	♂	0.0141733616172718	N.S.	0.354615517284465	1349.5120550941	153.56187258177	1350.65855019503
Smp_134800	XLOC_013502	macrophage colony-stimulating factor 1 receptor	3	♂	0.00846575034788619	N.S.	N.S.	531.736465579571	175.287148008029	995.813001559866	100*
Smp_133900	XLOC_024732	indoleamine -dioxygenase 2	PSA1	♂	0.00678144785956587	N.S.	N.S.	179.621846344229	61.6289762388209	214.814862770849
Smp_139450	XLOC_028570	venom allergen-like 22 protein	SC_0041	♂	0	N.S.	N.S.	28.7800537708917	0.159911338667284	41.2894866734107
Smp_179720	XLOC_025995	goodpasture antigen-binding protein	Z3	♂	N.S.	0.361501957893165	0.472596683602254	2487.004221147	1871.375546824	2067.73358386669
Smp_168950	XLOC_033653	proteophosphoglycan ppg1	SC_0297	♂	N.S.	N.S.	0.366816200567526	589.173066092683	349.437989632542	681.898800732063
Smp_124050	XLOC_000342	Venom allergen (val) protein	1	♂	N.S.	N.S.	0.113062064917343	14314.3130770413	1659.12285872358	9878.37987525886	100*
SURFACE ANTIGENS					#N/A	#N/A	#N/A	#N/A	#N/A	#N/A
Smp_164100	XLOC_020818	annexin-b12 (annexin-12)	nd	♀	222.042033815625	N.S.	N.S.	46.0892785947607	0	0
Smp_195090	XLOC_002689	Tegument-allergen-like protein (Inferred from Experiment)	nd	Switch	19.0620622311576	N.S.	0.0118877449294308	10650.3532620493	7.79858445459415	504.559615639137	100*
Smp_142230	XLOC_010388	cd63 antigen	nd	♀	11.8703030155501	N.S.	N.S.	8775.81061203546	628.096212046787	1000.00596300489
N.A.	XLOC_014245	cd63 antigen	nd	♀	4.99596317874421	N.S.	N.S.	874.622557067329	217.280622179936	199.982482417681
Smp_140000	XLOC_021121	tetraspanin-cd63 receptor	nd	♀	4.38803863741445	N.S.	N.S.	4487.51573974403	791.998638802902	1209.83940963161
N.A.	XLOC_011541	cd151 antigen	nd	♀	N.S.	2.99247845920551	N.S.	230.276764812734	221.587285876639	257.3232742064
Smp_011270	XLOC_010439	sj-ts4 protein	nd	♂	N.S.	N.S.	0.320066923675223	785.14993872615	532.139907774023	1246.74823024261	100*
Smp_150740	XLOC_003678	asparagine-rich antigen	nd	♂	0.357560561455533	N.S.	0.404033850698617	1487.61153449792	319.117330993003	2189.09720863475
Smp_093160	XLOC_031329	starp antigen	nd	♂	0.294652005256547	N.S.	N.S.	1015.19746716848	985.341561588596	1445.91280512736
Smp_035020.2	XLOC_000681	tetraspanin-33 isoform x2	nd	♂	0.276496976645546	N.S.	N.S.	2675.796954379	1465.98109038379	2954.63879934877
Smp_156770	XLOC_005020	major tegumental antigen sm15	nd	♂	0.22822394484799	N.S.	0.233648843229626	22278.6068797664	4920.78938160932	25838.0072087637
Smp_024820.2	XLOC_033774	cd63 antigen	nd	♂	0.176691121131683	N.S.	N.S.	7331.51765954752	4922.82590336952	10121.5739326491
Smp_124200	XLOC_000304	scavenger receptor-related	nd	♂	0.158542743533965	N.S.	N.S.	29.6786143309325	39.5880420493459	58.5907234572866
Smp_133880	XLOC_021870	cd109 antigen	nd	♂	0.154575369310681	N.S.	N.S.	218.502472183637	329.785362970414	362.991909389817
N.A.	XLOC_034668	cd109 antigen	nd	♂	0.153838849313429	N.S.	N.S.	35.2385405870592	55.6346622369896	48.6475181556459
Smp_095630	XLOC_032199	cd9-like protein sm-tsp-1	nd	♂	0.134734055769263	0.430317361523802	N.S.	7566.79524349731	6724.80239756129	13039.0318740658
Smp_045550	XLOC_014933	annexin	nd	♂	0.0985309157608671	N.S.	N.S.	6659.40914287676	2080.16750469331	11424.8058482622
Smp_011560	XLOC_025654	tetraspanin-1 (tspan-1)	nd	♂	0.0632382629282703	N.S.	0.456675613499195	13352.9680447916	4112.964369672	20812.6522417387
Smp_174630	XLOC_032195	tetraspanin 74f	nd	♂	0.0495624294342288	N.S.	N.S.	650.633479241921	789.846194380203	985.935351096691
Smp_193960	XLOC_017857	variable surface lipoprotein	nd	♂	0.0422053955405246	N.S.	0.0428209221268376	11.5822933555896	4.06349817830469	16.7083342063133
Smp_094710	XLOC_002559	adhesin wi-1	nd	♂	0.0388821300935119	N.S.	N.S.	175.162531764181	158.517642666481	417.724142959039
Smp_070020	XLOC_015517	rhoptry associated membrane antigen	nd	♂	0.0264883998092676	N.S.	0.319023109922292	2259.92966063125	875.654762100592	3621.0647171871
Smp_152990	XLOC_021096	tetraspanin-cd63 receptor	nd	♂	0.0236565427631422	N.S.	N.S.	73.4568892904378	72.418277881764	142.375527796289
Smp_132830	XLOC_006441	starp antigen	nd	♂	0.0232146634671991	N.S.	N.S.	124.862748765567	127.999476815959	205.093958923825
Smp_077720	XLOC_020817	annexin-b12 (annexin-12)	nd	♂	0.0196871602689923	N.S.	N.S.	9014.28272959787	17913.1366148362	13407.2839973059
Smp_212710	XLOC_012435	gynecophoral canal protein	nd	♂	0.0143709012252243	N.S.	N.S.	7117.93627587396	1348.28635280706	11812.2817329407
Smp_074460	XLOC_024049	tegumental protein	nd	♂	0.00399972142517083	N.S.	N.S.	1927.89748117956	1198.83710288695	3249.06707246882
Smp_045200	XLOC_022519	tegument antigen (i a)	nd	♂	0.00379609844684124	N.S.	N.S.	13382.0452664613	39307.6008704564	26290.810299752
Smp_155580	XLOC_030758	annexin	nd	♂	0.00343496286859774	N.S.	N.S.	8465.33712877696	11013.0604594524	10415.4911433007
Smp_086530	XLOC_002674	tegument antigen (i a)	nd	♂	0.00330526505023764	N.S.	0.352106381317401	43324.4421181826	15783.169837091	39897.4413018775
N.A.	XLOC_020042	13 kda tegumental antigen sm13	nd	♂	0.000307336811389938	0.28351486435926	N.S.	3998.59528654416	1104.01838902635	3952.1083258883
Smp_154180	XLOC_014252	Tetraspanin like putative protein	nd	♂	0.000223946541382368	N.S.	0.335117529575793	1047.4471288326	919.980775781676	1441.46765263876	100*
Smp_195190	XLOC_020044	13 kda tegumental antigen sm13	nd	♂	0.0000595149055803045	0.286673441037553	N.S.	7881.50790286119	2382.68489833852	8494.92833719233
N.A.	XLOC_034284	annexin a3 (annexin iii)	nd	♂	N.S.	N.S.	N.S.	126.563743637281	74.1994343749033	218.761551239032
Smp_148040	XLOC_005360	Tetraspanin putative	nd	♂	N.S.	N.S.	0.0451931612651491	359.552888549374	25.1796630754731	315.194583920673	100*
N.A.	XLOC_014330	Tetraspanin like putative protein	nd	♂	N.S.	N.S.	0.511582414713734	658.614695965127	63.2609977876451	962.826686406711	100*
Smp_017430	XLOC_014368	cd63 antigen	nd	♂	N.S.	0.404244027794686	N.S.	61166.4975593931	58261.0901072387	68066.5646122699
Smp_074150	XLOC_018879	annexin a13 (annexin xiii)	nd	♂	N.S.	0.326638850008821	0.455912680510254	6447.3644995185	2422.36366476214	6076.60943781249
N.A.	XLOC_018876	annexin a13 (annexin xiii)	nd	♂	N.S.	N.S.	0.434167455466343	4552.3099932398	3488.16051580714	3886.0799920361
Smp_055220.3	XLOC_015800	surface protein	nd	♂	N.S.	0.275572279835589	N.S.	1040.56985482523	640.069301301837	1043.04098797606
Smp_042150	XLOC_017176	Tegument antigen	nd	♂	N.S.	N.S.	4.30663115452785	3915.92899480788	1988.85252858683	3618.73484659888
Smp_045490	XLOC_016348	annexin	nd	♂	N.S.	N.S.	0.369681671893437	3171.72486419737	665.911539675616	2206.42154287474
Smp_152050	XLOC_003047	tetraspanin-18-like protein	nd	♂	N.S.	N.S.	0.501962446249887	197.165960724398	51.0947432159909	126.468473311831
Smp_045500	XLOC_014936	annexin	nd	♂	N.S.	N.S.	0.423511517583535	17924.1315389529	5020.45453002855	16772.9163847585
RECEPTORS					#N/A	#N/A	#N/A	#N/A	#N/A	#N/A
Smp_164140	XLOC_020847	opsin-like receptor	nd	♀	19.4962733217548	N.S.	N.S.	12.5513528167297	11.6252169652022	1.59389082079889
Smp_024010	XLOC_023762	microsomal glutathione s-transferase 1	nd	♀	19.0904228547547	N.S.	6.14819382031784	277.268274597484	806.849344121597	42.5687649375822
Smp_104210	XLOC_024036	opsin-like receptor	nd	♀	7.35563379149285	N.S.	N.S.	73.6134423506371	8.15863979977845	13.6167550460756
Smp_151190	XLOC_029486	retinal rod rhodopsin-sensitive cgmp 3 -cyclic phosphodiesterase subunit delta	nd	♀	5.89569492786241	N.S.	N.S.	425.571492613222	103.547459110104	175.699181605771
Smp_122810	XLOC_009056	mechanosensory protein 2	nd	♀	5.32432713231167	N.S.	2.97074151143948	449.642661753349	202.743338958229	342.800636717756
Smp_149640	XLOC_006049	band -like protein 1	nd	♀	3.32030012729366	N.S.	N.S.	1929.77470579908	1256.35799362231	1289.93584411271
Smp_060030	XLOC_001273	somatomedin-b and thrombospondin type-1 domain-containing isoform x2	nd	♀	N.S.	N.S.	3.27900455022843	83.8649974701099	583.763342876392	384.249868999365
Smp_135890	XLOC_026491	serine-rich adhesin for platelets-like isoform x3	nd	♀	N.S.	N.S.	2.93317236931254	133.547160297865	501.784450913897	255.202627450199
Smp_162440	XLOC_030359	mechanosensory protein 2	nd	♀	N.S.	N.S.	2.52121210427927	375.340029677195	343.644396497931	635.626604108925
Smp_065890	XLOC_026390	toll-interacting protein	nd	♂	0.322933661848997	N.S.	N.S.	2880.70427063352	2107.15145160324	3985.94634175244
Smp_000160	XLOC_013940	variable lymphocyte	nd	♂	0.296268771892471	N.S.	N.S.	414.489631564555	619.794357547824	835.231337626392
Smp_194050	XLOC_027903	clumping factor a precursor (fibrinogen-binding protein a) (fibrinogen receptor a)	nd	♂	0.252966420274986	N.S.	0.42130316966211	30390.0077919892	9425.98711358884	32338.4261473751
Smp_170110	XLOC_028747	high density lipoprotein binding isoform cra_b	nd	♂	0.206805328868879	N.S.	0.356157078495042	2153.98337555019	2250.73404170587	3419.99739628457
Smp_031880	XLOC_030482	immunoglobulin-like domain-containing protein	nd	♂	0.166775537711312	N.S.	N.S.	16552.2958626861	22698.6446069668	29013.9008121048
Smp_008710	XLOC_016506	immunoglobulin superfamily member 10	nd	♂	0.155446155786715	N.S.	N.S.	880.660230802004	728.808572463756	1869.89933480844
Smp_210100	XLOC_006945	spfh domain band 7 family protein	nd	♂	0.152136285585277	N.S.	N.S.	473.868421202968	252.120886971525	701.711164545465
N.A.	XLOC_020888	rhoptry protein	nd	♂	0.0761178861136646	N.S.	N.S.	38.0524769372637	2.44092590338323	55.6637219607376
N.A.	XLOC_020890	rhoptry protein	nd	♂	0.0655351264079051	N.S.	N.S.	19.6716146702784	0.159911338667284	44.0107037640017
N.A.	XLOC_020889	rhoptry protein	nd	♂	0.0416677507189566	N.S.	0.0522179121329814	18.5208395720128	0.159911338667284	30.7180251905715
Smp_003440	XLOC_000358	spfh domain band 7 family protein	nd	♂	0.0411743520455609	N.S.	N.S.	1951.77158940799	1464.57250440661	3208.83879835407
N.A.	XLOC_020891	rhoptry protein	nd	♂	0.0399925630511101	N.S.	N.S.	49.7586032433806	7.28251202184869	63.4303659290611
N.A.	XLOC_020886	rhoptry protein	nd	♂	0.0382625389905593	N.S.	0.153166600041488	19.5972076649028	0	15.4963233853344
Smp_168590	XLOC_031584	galectin-3-binding protein A (Scavenger receptor related)	nd	♂	0.00898261258473455	N.S.	0.398709414191653	596.295326554289	189.195825865785	924.820569122956	100*
Smp_175620	XLOC_020881	rhoptry protein	nd	♂	N.S.	0.476172946507759	N.S.	6800.5075153233	4282.83382268545	5660.78942375931
Smp_093840	XLOC_032205	complement inhibitory receptor	nd	♂	N.S.	0.416000408470378	N.S.	10377.1734641632	10756.4356815312	11478.5290495631
Smp_200690	XLOC_000896	complement component 1 q subcomponent-binding mitochondrial precursor	nd	♂	N.S.	0.404654501976595	N.S.	153.330528923554	316.46497607826	188.964940639888
Smp_055210	XLOC_017235	microsomal glutathione s-transferase 3	nd	♂	N.S.	0.401866423182308	N.S.	12860.5070295376	14353.4902547248	14655.3676329962
Smp_181220	XLOC_014505	complement component 1 q subcomponent-binding mitochondrial precursor	nd	♂	N.S.	0.330789870831326	N.S.	2384.21571938776	5382.04039489208	3590.27225444818
STRESS RELATED PROTEIN					#N/A	#N/A	#N/A	#N/A	#N/A	#N/A
Smp_097930	XLOC_007294	Universal stress protein (Serine Threonine kinase putative)	1	♀	Inf	N.S.	N.S.	140.274948968311	0	0	100*
Smp_150580	XLOC_018431	nst1p-like protein	5	♀	N.S.	N.S.	2.11394133390173	582.40326868166	331.672749014199	877.330765314753
Smp_076400	XLOC_030541	universal stress protein	SC_0149	♂	0.157042583909183	0.335680962683638	0.326050147809699	1989.74463938613	701.97545612459	2296.65793295178
Smp_200240	XLOC_003145	universal stress protein	1	♂	0.119367732518096	N.S.	0.495154658827292	7335.17436157053	1357.363448079	6957.70367003939
Smp_202690	XLOC_016742	universal stress protein	4	♂	0.028335794503541	N.S.	N.S.	4364.48234990335	2796.37933559864	5359.49645026416
N.A.	XLOC_017188	universal stress protein	4	♂	0.0204437287265586	N.S.	N.S.	113.730571614902	87.9233027004477	349.152346035412
Smp_205720	XLOC_034290	universal stress protein	SC_0549	♂	0.0177081842766805	N.S.	N.S.	1024.62308163911	985.297135641073	2098.33079690178
Smp_031300	XLOC_025080	universal stress protein	Z1	♂	N.S.	0.250893957326982	0.271720402970375	1249.75246154632	296.508396445226	954.957527927721
PUTATIVE MICROEXONS GENES					#N/A	#N/A	#N/A
Smp_159800	XLOC_033335	MEG-2 (ESP15) family	SC_0255	♀	N.S.	N.S.	Inf	0.253166222209478	0	174.969290478186	100*
N.A.	XLOC_006117	meg 1 isoform 3	1	♂	0	N.S.	N.S.	30.9082655909562	1.5505141582225	26.5171561023222
Smp_159810	XLOC_033786	MEG-2 (ESP15) family	SC_0255	Switch	0.0136433835329045	N.S.	37.6600047520244	163.740794822588	1.04281899873975	5112.03092755811	100*
N.A.	XLOC_030935	meg isoform 1	SC_0163	♂	0.00243129634496703	N.S.	N.S.	313.143741007409	982.138758580948	303.214886058682
Smp_010550	XLOC_021359	MEG 15	7	♂	N.S.	0.221536085383516	N.S.	23102.6083157951	33741.643137446	23730.0006007975	100*
Smp_163630	XLOC_003711	MEG-4 (10.3) family / developmentally regulated antigen precursor	1	♂	0.176090128043289	N.S.	N.S.	10987.2541147465	1773.86903283115	10394.5697264285	100*
NUTRITIVE MICROENVIRONMENT					#N/A	#N/A	#N/A
Smp_016730	XLOC_020701	Heme-binding protein putative	6	♀	74.427661789068	N.S.	N.S.	8220.56242587119	291.051326527354	296.072185923794	100*
Smp_196050	XLOC_031165	low-density lipoprotein receptor	SC_0169	♀	73.0624862527925	N.S.	N.S.	113.384562750772	25.5540558545605	7.33835116686764
Smp_099670	XLOC_007916	lipoprotein receptor	2	♀	6.38936604628141	N.S.	N.S.	195.413281599039	193.744210094356	41.1765282708048
Smp_034080	XLOC_001103	erythrocyte membrane protein	1	♀	N.S.	2.64479390769864	3.38128531952675	246.09914082696	247.259251249795	472.500791990656
Smp_105420	XLOC_008222	Prosaposin-like protein	2	Switch	N.S.	2.59406152609812	0.289243198617558	76091.7022544881	16902.2222607324	55777.269406231	100*
Smp_095130	XLOC_022698	porphobilinogen deaminase	Z2	♂	0.308193921757151	0.2011517053638	N.S.	595.889217609355	1154.21489722161	844.798453819089	100* & qPCR
Smp_127200	XLOC_005653	glucose transport protein	1	♂	0.240824681961177	N.S.	0.412050272571739	2121.88960981599	715.596487440203	2568.4720738262
Smp_212560	XLOC_010283	cytochrome b5 domain-containing protein 1-like	2	♂	0.205757087609093	N.S.	N.S.	430.057490747151	232.883056524474	697.501078042573
Smp_012440	XLOC_009951	glucose transport protein	2	♂	0.175853976738224	N.S.	0.417842229809618	11313.8747968321	8531.88917904204	19329.4832033107
Smp_180240	XLOC_031024	thrombospondin type 1 domain protein	SC_0164	♂	0.0974816576937226	N.S.	0.534250209897104	3818.19752388055	1519.92899922777	5454.23125658528
Smp_156820	XLOC_030071	normocyte binding protein	SC_0137	♂	0.0761886347864293	N.S.	N.S.	52.8506313800938	13.5873982395774	163.860358042893
Smp_000260	XLOC_013930	saposin containing protein	3	♂	0.0716045873867621	N.S.	0.525081663650246	49606.2688156523	15111.701087324	72398.9148124826
Smp_166030	XLOC_031675	erythrocyte membrane	SC_0181	♂	0.056857524046625	N.S.	0.359524629066082	10087.2319231856	9088.586791565	19455.4858760494
Smp_127270	XLOC_031895	cytochrome b561 ferric reductase -containing protein	SC_0187	♂	0.0387166309719733	0.285460020601726	N.S.	136.131075239167	206.755271885648	154.294810792473
Smp_063530.2	XLOC_002646	apoferritin-2	1	♂	0.0137222964170447	N.S.	N.S.	12424.1395898242	2352.17775788068	16137.027222673
Smp_146950	XLOC_010670	low-density lipoprotein receptor	2	♂	0.0127821660605239	N.S.	N.S.	361.921323003608	185.050250827144	741.04287961109
Smp_179370	XLOC_023760	low-density lipoprotein receptor	PSA4	♂	N.S.	0.39124650969785	N.S.	2719.95598484525	6441.31461489841	3144.18831453374
Smp_055900.3	XLOC_033364	leptin receptor overlapping transcript-like 1	SC_0258	♂	N.S.	0.453502566646222	N.S.	5627.63007225735	5591.82658448827	5399.68006414991
Smp_024110	XLOC_026646	enolase	PSA4	♂	N.S.	0.336107986772448	N.S.	115633.37115788	88014.4010663982	119060.335361252
Smp_087760	XLOC_007000	ferritin-1 heavy chain	SC_0076	♂	N.S.	0.318517968869206	N.S.	3315.05059441293	13021.9236842424	3751.68125670821
Smp_130100	XLOC_009806	saposin containing protein	2	♂	N.S.	N.S.	0.31629257799334	19034.002254357	5179.18860412707	18691.9768504534
Smp_014570.2	XLOC_008031	saposin containing protein	2	♂	N.S.	N.S.	0.292690213287615	30905.17901202	6159.34176911768	21902.4901579741
Smp_016490.2	XLOC_016024	saposin b domain-containing protein	4	♂	N.S.	N.S.	0.26179181924069	26128.2486432151	2468.28341910409	18147.4275685088
Smp_075800	XLOC_014319	hemoglobinase (c13 family)	nd	♂	N.S.	N.S.	0.179664279705857	82995.931617666	20425.5769401759	61990.5058625589

## Sheet: Sheet6 - DNARNAmodif.
DNA / RNA MODIFICATIONS & TRANSCRIPTION CONTROL (339 hits)
Gene ID (v5.2)	CuffLinks IDs	Predictive product	Chromosomal location	Sex of bias	Fold Change			Expression level average (rpkm)			Specific remarks
					Cercariae	Schistosomula S#2	Adults	Cercariae	Schistosomula S#2	Adults
DNA MODIFICATIONS: CHROMATIN STRUCTURE					#N/A	#N/A	#N/A
N.A.	XLOC_000237	myst histone	1	♀	Inf	N.S.	N.S.	9.03151177654474	0	0
Smp_074610	XLOC_030332	histone -like	SC_0144	♀	67.165349986731	N.S.	N.S.	551.496662583598	814.852116654102	43.6084187014749
N.A.	XLOC_004608	histone h3 type 2	1	♀	48.2607276846565	N.S.	N.S.	25.2621645576566	0	0.257826204022503
N.A.	XLOC_008961	myst histone	2	♀	34.627247388135	N.S.	N.S.	7.36199407055974	0.799556693336419	0.533833491935816
N.A.	XLOC_005973	myst histone	1	♀	29.2001312099658	N.S.	N.S.	49.4685315754383	22.0846576518158	7.03244091603059
N.A.	XLOC_027124	myst histone	PSA4	♀	11.5930049019633	N.S.	N.S.	427.10254206588	38.3880472412398	40.3444233524487
N.A.	XLOC_023784	myst histone	PSA4	♀	10.9466000396388	N.S.	N.S.	119.05286822904	3.73393630893967	13.4275849850827
Smp_160700	XLOC_015413	histone-lysine n- h3 lysine-36 and h4 lysine-20 specific	4	♀	6.7785471178615	N.S.	N.S.	4278.11848334051	1250.75990515173	1316.46328244683
Smp_170760	XLOC_004382	bromodomain containing protein	1	♀	5.64180584885309	N.S.	N.S.	4916.06311194506	1418.27116498112	1932.56982893871
Smp_014400.3	XLOC_028368	enhancer of polycomb	SC_0037	♀	5.43502116923209	N.S.	N.S.	11125.8916776476	5410.43734316192	4176.01338758056
Smp_108390	XLOC_033198	histone h2b	SC_0248	♀	5.35817147976743	N.S.	3.25824736794999	3417.34122560127	2222.51584297776	1672.43295175145
Smp_002930	XLOC_013373	histone h2a-like	3	Switch	4.41949105045862	0.340712456910639	N.S.	296.677106949016	3218.89620859575	148.054960268629
Smp_043580	XLOC_018546	histone-lysine n-methyltransferase setmar-like	5	♀	3.81391106387465	N.S.	N.S.	2975.91160702013	811.280019024694	1241.97513738995
Smp_131310	XLOC_020712	histone acetyltransferase kat6b isoform x4	6	♀	3.70093033225741	N.S.	N.S.	2567.37642492088	956.477206616831	1324.91221645753
Smp_131320	XLOC_020714	histone acetyltransferase kat6b	6	♀	3.50190230223941	N.S.	N.S.	283.405864444193	118.526789039155	157.572298960624
Smp_137970	XLOC_012774	protein jade-1	3	♀	2.93246734990217	N.S.	N.S.	2431.96264266698	1621.16596147503	1557.72532798809
Smp_144180	XLOC_002973	myeloid lymphoid or mixed-lineage leukemia	1	♀	2.93159341326136	N.S.	N.S.	2266.77661838962	1395.11763684179	1717.99425904183	qPCR
Smp_153560	XLOC_026202	yeats domain-containing protein 4	PSA4	♀	N.S.	2.25202381624578	N.S.	2495.24924906692	1073.64619383326	1801.24203739268
N.A.	XLOC_003676	ectopic virus integration site	1	♀	N.S.	N.S.	6.77064165465343	8.18449878177071	16.3580233057891	30.1441851433152
Smp_137390	XLOC_001590	histone rna hairpin-binding protein	2	♀	N.S.	N.S.	2.55236841711639	113.029043116778	1815.2059581775	345.328196500296
Smp_144550	XLOC_002012	chromobox (chromobox 1) (heterochromatin 1)	1	♂	0.334360659170827	N.S.	N.S.	1804.81034067791	1802.76526897329	3288.43726335307
Smp_134330	XLOC_007682	SWI/SNF-related matrix-associated actin-dependent regulator of chromatin subfamily D member	2	♂	0.332910977568924	0.133391562827907	0.376801846986568	908.576136270319	1835.4139435865	1064.40477424686	100*
Smp_148930	XLOC_017787	fact complex subunit ssrp1	4	♂	0.318852454638525	0.401018658155599	N.S.	2948.50157227787	4236.49887366798	4628.96070059474
Smp_027300	XLOC_017321	histone-lysine n-methyltransferase suv39h2	4	♂	0.307961456525336	0.390998254690287	N.S.	911.826028223499	2218.73807987867	1267.26927916697	qPCR
Smp_040020	XLOC_018236	histone h3	5	Switch	0.283868941479851	N.S.	3.04772903870313	86.3589498922866	810.980171443472	226.079257595771
Smp_211290	XLOC_020992	protein arginine n-methyltransferase 3-like	7	♂	0.22119798483989	N.S.	N.S.	2590.98868695035	2878.97328499499	3772.40559178788
Smp_149110	XLOC_017296	bromodomain containing protein	4	♂	0.214168101170266	N.S.	N.S.	996.052782910483	603.485908489921	1894.6244779897
Smp_165220	XLOC_023151	polycomb protein EED	Z3	♂	0.177395804628784	0.197513092537442	N.S.	1130.87066559774	2892.65105823592	1524.07683406931	100*
N.A.	XLOC_034309	histone acetyltransferase-related	SC_0561	♂	0.16562883742854	N.S.	N.S.	26.800953053115	34.4367777637597	43.8067797769038
N.A.	XLOC_023117	myst histone	Z3	♂	0.0525872654651735	N.S.	N.S.	72.6515956429107	7.79099532956943	82.3975035467479
N.A.	XLOC_014212	histone deacetylase 6 10	3	♂	0.0378920089398178	N.S.	0.163020019656172	26.7162008779784	6.43959327090187	28.5501436453751
N.A.	XLOC_029536	myst histone	SC_0125	♂	0.0109055540150069	N.S.	N.S.	23.4675963979806	9.45648247237284	32.9114049080694
Smp_177250	XLOC_014211	histone deacetylase 6-like	3	♂	0.00582176876661243	N.S.	0.239398277148936	87.4786023364748	29.8654250587615	125.6084032422
Smp_142180	XLOC_022651	poly(adp-ribose) glycohydrolase	Z2	♂	N.S.	0.420051333239437	0.489096928094364	6932.85134333321	3996.9857916076	5515.01359216887	qPCR
Smp_179650	XLOC_007519	chromobox protein homolog 1 (heterochromatin protein 1 homolog beta)	2	♂	N.S.	0.468797664487337	N.S.	8845.16602623435	18704.4610917123	10916.1802951515
Smp_155060.2	XLOC_029007	phosphatase 2a inhibitor i2pp2a	SC_0062	♂	N.S.	0.467980321748301	N.S.	53404.2445665373	128375.505160539	64340.8471951547	qPCR
Smp_079000	XLOC_007060	charged multivesicular body protein 1b-2 (chromatin-modifying protein 1b-2)	1	♂	N.S.	0.458965472444245	N.S.	6796.92091882557	7629.65149742536	7445.42871589243
Smp_070760	XLOC_011611	yeats domain-containing protein	3	♂	N.S.	0.455155822324809	N.S.	666.347929415435	1069.41786651397	737.447727050928
Smp_031720	XLOC_021276	histone h2a	7	♂	N.S.	0.454040271462344	N.S.	3855.60906003176	9722.20657236305	5396.95379955742	qPCR
Smp_086860	XLOC_002341	histone h2a	1	Switch	N.S.	0.450553806002639	3.58109722210687	744.54748276573	12225.7102070935	1670.72192708875
Smp_023530	XLOC_012229	nucleosome assembly protein	3	♂	N.S.	0.44392793745018	N.S.	7184.95578600183	9388.12725022887	7610.53874731321	qPCR
Smp_024380	XLOC_023832	arginine n-methyltransferase 2	PSA4	♂	N.S.	0.441981725624048	N.S.	1303.75536667894	3233.06606009742	1613.04156050355
Smp_154640	XLOC_001724	swi snf-related	1	♂	N.S.	0.434252257453021	N.S.	4143.22691565378	4488.38365530049	3163.17535270354
Smp_006780	XLOC_005303	n-alpha-acetyltransferase 50 isoform x2	1	♂	N.S.	0.43166934537958	N.S.	2828.12882980772	4871.67667948718	3115.09054319398
Smp_022310	XLOC_022131	swi snf-related matrix-associated actin-dependent regulator of chromatin subfamily a containing dead h box 1-like	Z1	♂	N.S.	0.426620606804369	N.S.	5684.89228585623	3983.03872253984	4552.12326473055
Smp_005210	XLOC_001572	histone deacetylase 1	1	♂	N.S.	0.417678589547119	N.S.	4699.05886300551	9761.07222644948	6216.30230653311
Smp_076530	XLOC_030551	regulator of chromosome condensation	SC_0149	♂	N.S.	0.415682025345558	N.S.	2835.01465583409	5403.1252710946	3766.86106375696
Smp_210630	XLOC_020516	histone h2av	6	♂	N.S.	0.391476901706557	N.S.	3367.86617595338	11393.3359913516	5049.70324814603
Smp_064050.2	XLOC_016581	ruvb-like 1-like	4	♂	N.S.	0.384413722034145	N.S.	3186.57946952452	6836.89980321939	4494.39196667058
Smp_089860	XLOC_010265	histone H3.2	2	♂	N.S.	0.377484534053391	N.S.	420.765022253528	590.965658559371	176.060931711374	qPCR
Smp_171710	XLOC_022066	smc2 protein	Z1	♂	N.S.	0.362803648569267	N.S.	1511.07649146244	2878.42621244627	1946.49138508686	qPCR
Smp_038560.2	XLOC_026175	prothymosin alpha-b	Z3	♂	N.S.	0.331582749968263	N.S.	14379.3776411359	32007.0405112674	21375.790760401
Smp_033020	XLOC_025447	anti-silencing protein	Z2	♂	N.S.	0.328756479586062	N.S.	1901.10432392988	5375.85298496796	2566.61730709767	qPCR
Smp_068950	XLOC_022332	probable histone-binding protein caf1-like	Z1	♂	N.S.	0.324395693183906	N.S.	3221.37407834957	3900.68002567517	2914.34286714797
Smp_199640	XLOC_034018	SWI:SNF matrix associated	SC_0390	♂	N.S.	0.216556486101622	0.503479080121856	2520.06000843069	4758.48560810777	2362.8682623819	100*
Smp_210650	XLOC_029812	histone lysine N methyltransferase SETD2	SC_0129	♂	N.S.	0.185655540700183	0.463723753349744	4728.97250319919	6271.34424194664	4811.17510579859	100*
Smp_082240	XLOC_029414	Histone H3	SC_0111	♂	N.S.	0.18226223697818	0.495895052789259	24118.4316854515	56944.7493128093	27018.9162424265	100*
Smp_022570	XLOC_007664	atxn7l3-like protein	4	♂	N.S.	N.S.	0.462991242015239	2295.90207571275	1582.01297277224	2428.69429146356
Smp_016390	XLOC_017381	charged multivesicular body protein 2a (chromatin-modifying protein 2a)	1	♂	N.S.	N.S.	0.422949484700019	6046.91923125599	2541.3257153853	5294.28328276321
DNA MODIFICATIONS: BINDING, WINDING, REPLICATION & DAMAGE RESPONSE					#N/A	#N/A	#N/A
N.A.	XLOC_028970	dead box atp-dependent rna helicase	nd	♀	Inf	N.S.	N.S.	39.2680353525884	0.159911338667284	0.257826204022503
N.A.	XLOC_026176	dead box atp-dependent rna helicase	nd	♀	Inf	N.S.	Inf	29.3357381689411	5.78434333705712	9.6625547961586
Smp_157880	XLOC_026361	dna double-strand break repair rad50 atpase	nd	♀	Inf	N.S.	N.S.	17.3781112076179	0.159911338667284	0.266916745967908
N.A.	XLOC_015659	dead box atp-dependent rna helicase	nd	♀	Inf	N.S.	N.S.	17.3594646273287	0	0
N.A.	XLOC_015957	dead box atp-dependent rna helicase	nd	♀	Inf	N.S.	N.S.	12.322672665268	0	0
N.A.	XLOC_013256	prokaryotic dna topoisomerase	nd	♀	Inf	N.S.	N.S.	5.6363573079258	0.159911338667284	0
N.A.	XLOC_023380	dead box atp-dependent rna helicase	nd	♀	130.849433309709	N.S.	N.S.	161.481917241953	4.17902505191647	8.1028176562115
N.A.	XLOC_007517	g-box binding factor homolog	nd	♀	42.5416225468783	N.S.	N.S.	26.9922481117154	9.23290100293141	11.9570730923592
Smp_200700	XLOC_000898	prokaryotic dna topoisomerase	nd	♀	29.3434294098295	N.S.	N.S.	71.5342951920134	0.625691399243849	4.72222931202498
N.A.	XLOC_007433	dead box atp-dependent rna helicase	nd	♀	26.4330421720165	N.S.	N.S.	8.3996194267116	0.479734016001852	1.84106717671739
N.A.	XLOC_028697	prokaryotic dna topoisomerase	nd	♀	25.4235063240291	N.S.	N.S.	8.09051346363446	0	0.467411522786947
N.A.	XLOC_001372	dead box atp-dependent rna helicase	nd	♀	20.6313711253051	N.S.	N.S.	235.435347646376	68.7016347738181	36.7750372914579
N.A.	XLOC_014158	prokaryotic dna topoisomerase	nd	♀	17.2077995796681	N.S.	N.S.	22.4373025233259	3.82672826320661	3.18901051097022
N.A.	XLOC_034100	dna repair transcription protein met18	nd	♀	10.4088098039176	N.S.	N.S.	310.880057998587	45.0827054928194	69.3573077182744
Smp_147810	XLOC_010577	tatd dnase-related	nd	♀	9.63938709661579	N.S.	N.S.	138.361431490936	56.9196061480133	28.1198730379929
N.A.	XLOC_022927	prokaryotic dna topoisomerase	nd	♀	7.01022684831344	N.S.	N.S.	43.7124507111542	5.00601042502713	14.5852788850026
Smp_134090	XLOC_009341	dna repair protein rad51 homolog 4-like	nd	♀	4.89923370726135	N.S.	N.S.	1979.492520877	480.889870125928	561.969878895388
Smp_008340	XLOC_005076	5 -nucleotidase domain-containing protein 3-like	nd	♀	4.71867515068701	N.S.	N.S.	5066.66762255172	1625.96289568515	1929.87173643266
Smp_128010	XLOC_020641	dna-directed rna omega subunit family protein	nd	♀	4.55316136244815	N.S.	N.S.	515.436334123406	25.3070458569897	158.524230029276
Smp_052390	XLOC_011812	origin recognition complex subunit 5	nd	♀	4.12519113793802	N.S.	4.33322446243771	306.973112003949	952.91965722234	251.126962607898
Smp_097180	XLOC_008724	5 -nucleotidase	nd	♀	3.88659618828582	N.S.	N.S.	2655.32891817611	387.116748849268	919.149689672076
N.A.	XLOC_011845	integrase core domain protein	nd	♀	3.74676383205886	N.S.	N.S.	542.511226693695	2678.60516120092	435.830717233646
Smp_083780	XLOC_004947	ku p80 dna helicase	nd	♀	2.95260262128093	N.S.	N.S.	5445.55172746856	1948.70995696445	2866.09841532623
N.A.	XLOC_013830	prokaryotic dna topoisomerase	nd	♀	N.S.	N.S.	26.023595391777	1.01915809164392	1.05677295416503	13.9347820378037
Smp_128160	XLOC_010440	cst complex subunit stn1	nd	♀	N.S.	N.S.	3.25567990665909	25.0524038544537	153.623031060469	62.7309357879546
Smp_160630	XLOC_033012	dna repair protein rad51 homolog 3	nd	♀	N.S.	N.S.	3.25256826508094	42.8230203177167	91.7375581168284	52.7794713373581
Smp_106040	XLOC_013019	structure-specific endonuclease slx1	nd	♀	N.S.	N.S.	2.96488031100337	297.313449409999	1556.23824516493	512.751436424852
Smp_026030	XLOC_017752	dna repair and recombination protein rad54-related	nd	♀	N.S.	N.S.	2.91956938578729	62.3780688912705	325.743814266485	149.987743083181
Smp_128210	XLOC_008845	claspin-like protein	nd	♀	N.S.	N.S.	2.86108001444162	86.2020960181326	547.951286470352	229.568238049931
Smp_094140	XLOC_031213	dna replication licensing factor mcm6	nd	♀	N.S.	N.S.	2.84822031761243	631.502349257032	6652.30355116486	1508.01879064331	qPCR
Smp_042210	XLOC_017183	origin recognition complex subunit 4	nd	♀	N.S.	N.S.	2.7000995465685	317.473436462456	717.296797659045	623.190622209494
Smp_151560	XLOC_006063	dna replication licensing factor mcm1	nd	♀	N.S.	N.S.	2.62345581618294	40.4463871906471	331.467155429708	112.407115013094
Smp_133990.2	XLOC_007571	topoisomerase ii binding protein 1	nd	♀	N.S.	N.S.	2.58568257555478	40.6929026178303	249.483294551362	88.1179275687882
Smp_178260	XLOC_027833	dna polymerase alpha catalytic subunit	nd	♀	N.S.	N.S.	2.57696769601689	318.5962035672	1787.14686788191	360.853291056119
Smp_193360	XLOC_017356	fanconi anemia group i-like protein	nd	♀	N.S.	N.S.	2.51352494487381	163.530623306424	579.822144216985	320.737795784877
Smp_124230	XLOC_000295	dna repair protein rad51 homolog 1	nd	♀	N.S.	N.S.	2.48702269869401	378.300198778941	1404.87024661583	430.972909660303	qPCR
Smp_135900	XLOC_026483	dna double-strand break repair rad50 atpase	nd	♀	N.S.	N.S.	2.30765625935405	144.625521001416	682.351093931182	294.156876322085
Smp_040350	XLOC_002966	dna-binding protein rfx7	nd	♀	N.S.	N.S.	2.12641624691775	349.180718802396	1159.58728049949	563.549888487837
Smp_069600	XLOC_014076	atp-dependent dna helicase q4	nd	♀	N.S.	N.S.	1.95055888232793	320.542767065222	1216.55205526445	643.166689221583
N.A.	XLOC_016215	uracil-dna glycosylase	nd	♂	0.346089712977047	N.S.	N.S.	377.932443801004	220.022631496358	578.332177972402
N.A.	XLOC_017867	regulator of telomere elongation helicase 1 homolog	nd	♂	0.338336712877495	N.S.	N.S.	324.722700890263	356.833662679038	403.089817576547
Smp_068440	XLOC_007779	dead box atp-dependent rna helicase	nd	♂	0.311413926593012	N.S.	N.S.	4088.49192891713	7010.31148682423	7572.61403060945
Smp_103530	XLOC_017702	high mobility group protein dsp1	nd	♂	0.303634789052623	N.S.	N.S.	1923.3384571233	2633.15995000396	4014.65489015243
Smp_169450	XLOC_028612	dna replication licensing factor	nd	♂	0.29928543155836	N.S.	N.S.	2582.64398621915	1770.74139470828	4083.28559489478
Smp_130210	XLOC_008064	chl1 helicase homolog	nd	♂	0.295207690350292	N.S.	N.S.	186.480726904449	57.187360929856	278.245269113028
Smp_121800	XLOC_012547	replication protein a 70 kda dna-binding subunit-like isoform x2	nd	♂	0.288348237228419	N.S.	N.S.	1906.60734402994	3785.20595583589	2875.98203481006
Smp_066290	XLOC_011186	telomerase protein component 1	nd	♂	0.275296897335895	N.S.	N.S.	2198.03256962444	1503.75485313609	2771.69123818102
Smp_051320	XLOC_028929	recombination repair	nd	♂	0.273604136302136	0.376536152142242	N.S.	752.206307179746	1577.0758486064	1113.94770189438
Smp_158920	XLOC_016210	uracil-dna glycosylase	nd	♂	0.266089094537098	N.S.	N.S.	898.277279038577	998.257533747638	1213.51800713367
Smp_136180	XLOC_004479	dna polymerase eta	nd	♂	0.253430827927397	N.S.	N.S.	951.840308522608	737.929521338472	1334.88905087578
Smp_061920	XLOC_026138	uv excision repair protein rad23 b	nd	♂	0.252804074538477	0.252271294756829	0.385456801528669	9747.56122194392	10860.2636758602	12829.5601622854	100*
Smp_068840	XLOC_026616	homologous-pairing protein 2 homolog	nd	♂	0.238378931435163	N.S.	N.S.	2331.87113108468	764.856609828946	2197.89986642744
Smp_172530	XLOC_019433	dna replication licensing factor mcm4	nd	Switch	0.232887756037422	N.S.	2.41036917291658	331.889914872234	3510.54865138611	873.156308758191
Smp_096360	XLOC_028870	replication factor c subunit 4	nd	♂	0.223615579635944	N.S.	N.S.	769.64704285961	1797.14696225141	1166.4712249875
Smp_037590	XLOC_007653	dna replication licensing factor mcm3	nd	♂	0.214406927253455	N.S.	N.S.	1288.73950335476	5573.36587116839	2863.36120173428
Smp_128330	XLOC_025642	dna-binding protein d-ets-3	nd	♂	0.205252683945107	N.S.	0.194269161070236	116.363587550397	45.5247092275721	88.3410376158001
Smp_129130	XLOC_013115	dna helicase recq5	nd	♂	0.195287282915344	N.S.	0.418605580203854	901.0672392615	571.790361931788	1387.58940711129
Smp_079050	XLOC_032832	dna primase large subunit	nd	♂	0.189150506682622	0.272425428649859	N.S.	353.173971105159	3048.66191047432	653.733405543054
Smp_165580	XLOC_022727	rad25 xp-b dna repair helicase	nd	♂	0.182269047753049	N.S.	0.434042132654039	2132.68456295724	1802.37793608732	2470.9314919876
Smp_194820	XLOC_023866	dna repair and recombination protein rad54-like	nd	Switch	0.181582615950043	N.S.	2.81198365128922	134.810439017675	957.649840026686	375.694234203147
N.A.	XLOC_005187	minichromosome maintenance complex component 2	nd	♂	0.180404170512168	0.418611085537175	N.S.	764.474753538607	4358.48294252899	1472.8812462053
Smp_147230	XLOC_008530	atp-dependent dna helicase pif1	nd	♂	0.164361393421492	N.S.	N.S.	221.638248388767	518.515502350511	405.61046155455
Smp_148680	XLOC_005495	dna double-strand break repair rad50 atpase	nd	♂	0.151286286856377	N.S.	N.S.	85.9270828518666	75.6665179184513	98.9124322363031
Smp_050820	XLOC_016419	replication factor c 38kd subunit	nd	♂	0.148519516521906	0.418054588537358	N.S.	440.957709521704	2131.37939539073	840.151870762331
Smp_146160	XLOC_022529	fanconi anemia group d2 protein	nd	♂	0.137604914510887	N.S.	N.S.	972.917898955855	2640.48169056259	1262.30682412544
Smp_047110	XLOC_023329	ATP dependent RNA helicase DDX52	nd	♂	0.136579746647875	0.223090263622415	0.435750575263739	1212.96916687614	2958.34520892426	1752.69911864958	100*
Smp_181870	XLOC_028611	dna replication licensing factor mcm8	nd	♂	0.124012858686981	N.S.	N.S.	47.9464878399775	209.254560377268	119.737429324405
Smp_160840	XLOC_013561	prokaryotic dna topoisomerase	nd	♂	0.10265957668985	N.S.	N.S.	62.0572843381227	38.5661046602579	84.2985419469558
Smp_074010	XLOC_011233	8-oxoguanine dna glycosylase	nd	♂	0.0880763127182391	N.S.	N.S.	1853.35167862733	1052.54991896444	1950.14050196659
Smp_169580	XLOC_024877	pcna-interacting partner	nd	♂	0.0811740531666342	N.S.	0.372798629704429	2139.17902913576	2407.04019128239	2839.83928472137
N.A.	XLOC_015683	prokaryotic dna topoisomerase	nd	♂	0.0671082898124762	N.S.	N.S.	11.4839982453388	2.7739358132293	24.9707829171784
Smp_137580	XLOC_027752	helicase ski2w-like	nd	♂	0.0661313970419828	N.S.	0.315443875035211	4438.43395832101	1651.22854352868	5653.43346842045
N.A.	XLOC_006838	prokaryotic dna topoisomerase	nd	♂	0.0208368769534308	N.S.	N.S.	22.9790960878804	3.01099322016482	35.3921115622087
N.A.	XLOC_002441	prokaryotic dna topoisomerase	nd	♂	0.0149421756463696	N.S.	N.S.	50.3221248455852	1.27929070933827	50.2812760079776
Smp_144440	XLOC_032924	replication a protein	nd	♂	0	N.S.	N.S.	18.3244472494508	0.764911420311371	10.7820041277632
N.A.	XLOC_031502	prokaryotic dna topoisomerase	nd	♂	0	N.S.	N.S.	18.8674563064174	7.75876619006336	21.624174655501
Smp_031010	XLOC_022145	dead box atp-dependent rna helicase	nd	♂	N.S.	0.467330136953986	N.S.	1924.72501350649	1534.80723096818	1954.91684614023
Smp_133120	XLOC_003915	dead box atp-dependent rna helicase	nd	♂	N.S.	0.446706295090674	N.S.	11633.6947449039	18970.7522932421	14431.2245016165
Smp_155360	XLOC_023398	dna-binding protein inhibitor id-1	nd	♂	N.S.	0.428570392320504	N.S.	977.153687294845	1616.84147857977	971.860509809836
Smp_097800	XLOC_028165	cold shock domain protein a	nd	♂	N.S.	0.423838324198991	N.S.	43499.6374710402	97481.6501020583	56636.5936644128
Smp_003660	XLOC_003470	helicase at 25e	nd	♂	N.S.	0.416050425947683	N.S.	21102.0808116594	22677.3836552544	14112.8089914364
Smp_051230.3	XLOC_028949	tar dna-binding	nd	♂	N.S.	0.414542363786402	N.S.	8268.64598324914	13045.322169499	8555.38809744856
Smp_055890	XLOC_033350	ribonucleoside-diphosphate reductase subunit m2	nd	♂	N.S.	0.413156458440781	N.S.	2519.18756611533	9470.91164335689	3027.50323599068
Smp_198820	XLOC_029311	dna replication complex gins protein psf3	nd	♂	N.S.	0.409880436048231	N.S.	844.960203159778	1825.31590361206	986.471259595549
Smp_211330	XLOC_010886	atp-dependent rna helicase dhh1	nd	♂	N.S.	0.408608514978922	N.S.	11830.1383163465	20012.4897831898	14265.1691898364
Smp_097750	XLOC_027963	dna-binding protein	nd	♂	N.S.	0.407151153428976	N.S.	8350.83628829936	20673.9706123663	8841.68382680593
Smp_080530	XLOC_025529	replication protein a 32 kda subunit	nd	♂	N.S.	0.405255274315644	N.S.	1893.22033178034	3245.50232196819	2083.16679541729
Smp_153770	XLOC_022452	dna repair endonuclease xpf	nd	♂	N.S.	0.395806146302354	N.S.	1561.42689967617	1444.86855692638	1688.61414352065
Smp_009030	XLOC_016480	ribonucleoside-diphosphate reductase large subunit	nd	♂	N.S.	0.391375666755136	N.S.	2162.49339570807	9576.66153436943	3168.39869503079
Smp_104720	XLOC_022307	nad dependent epimerase dehydratase	nd	♂	N.S.	0.384924702325983	N.S.	3552.19242474108	3452.34647320169	3483.47526397068
Smp_100380	XLOC_034526	dna replication complex gins protein psf2-like	nd	♂	N.S.	0.375675115093046	N.S.	305.66060321288	1358.22721969315	403.343228403208
Smp_179300.3	XLOC_017147	cellular nucleic acid-binding protein	nd	♂	N.S.	0.366226422441448	N.S.	43573.1810217157	77097.1400052453	40145.1513947857
Smp_033050	XLOC_025451	dna topoisomerase type i	nd	♂	N.S.	0.363929577090506	N.S.	3654.73541152288	4928.65917854346	4507.53665248682
Smp_076660	XLOC_003721	dna polymerase delta small subunit	nd	♂	N.S.	0.347099307357428	N.S.	4474.60840695389	6752.42328689004	5354.28623288088
Smp_087270	XLOC_015561	atp-dependent rna helicase	nd	♂	N.S.	0.339397136603231	N.S.	3436.97290888009	5057.62905647627	3700.42734802102
Smp_146340	XLOC_009663	atp-dependent rna helicase ddx27	nd	♂	N.S.	0.338716737676757	N.S.	872.614931228047	1456.24029438858	1133.26807327799
Smp_133300	XLOC_031174	5 -3 exoribonuclease 2 isoform x1	nd	♂	N.S.	0.316796734901663	N.S.	2934.21865528583	5409.46415909624	3473.91447864071
Smp_033710	XLOC_010812	dead box atp-dependent rna helicase	nd	♂	N.S.	0.300799543345801	N.S.	3812.88105077561	5809.56127126976	4704.07343954681
Smp_032500	XLOC_027171	dna replication licensing factor mcm7	nd	♂	N.S.	0.286446343098804	2.16089949980327	694.250576802316	7902.62669088509	1077.45837057482
Smp_092880.2	XLOC_007661	single-stranded dna-binding protein 3	nd	♂	N.S.	0.275940460250303	N.S.	7682.67841753407	9962.78994912258	6930.93033185675
Smp_019840.2	XLOC_029981	dna ligase 1-like	nd	♂	N.S.	0.265536374828605	N.S.	2482.33356710154	2934.521897275	2539.72124406487
Smp_044550	XLOC_022485	Far upstream element-binding protein	nd	♂	N.S.	0.192116387043883	N.S.	21683.5314782202	34718.5915649722	17770.7273747162	100*
Smp_210950	XLOC_022491	dna polymerase catalytic subunit	nd	♂	N.S.	N.S.	0.508782748023601	3138.0976798345	1802.94470776925	2563.23975398484
Smp_008610	XLOC_017725	deoxyribonuclease ii-related	nd	♂	N.S.	N.S.	0.267978647915962	5868.58598296267	1284.15467877697	4284.58947951271
TRANSCRIPTION: TRANSCRIPTION FACTORS					#N/A	#N/A	#N/A
Smp_066930	XLOC_015122	transcription factor sp8	nd	♀	Inf	N.S.	N.S.	26.8413691074247	5.77628657608312	0.953004129464703
N.A.	XLOC_016426	krab-a domain-containing protein	nd	♀	Inf	N.S.	N.S.	15.64324081273	0.159911338667284	0.524742949990411
Smp_157840	XLOC_023546	transcription factor ap-2 gamma	nd	♀	277.045803190916	N.S.	N.S.	57.4552261120584	7.00634984066583	4.75136064346501
Smp_018590	XLOC_011249	transcription factor gata-3	nd	♀	23.2860206533393	N.S.	N.S.	50.0012357683632	5.07186364325828	6.88437766771574
Smp_022610	XLOC_007668	Transcription factor 21-like	nd	♀	21.3424623587205	4.83783516149665	21.3695325883935	11.4577877197102	59.9600048637333	28.9697653594904	100*
Smp_165380	XLOC_017084	transcription factor with ap2 domain	nd	♀	8.47780355132975	N.S.	N.S.	21.4003308795216	3.71377745504657	8.48312158997379
Smp_168600	XLOC_026797	aryl hydrocarbon receptor	nd	♀	7.53135286711242	N.S.	4.11722503891344	229.911698087006	150.668938290578	181.335103288843
Smp_194670	XLOC_011150	transcription factor coe4-like protein	nd	♀	7.0735930255647	N.S.	N.S.	24.1602174386702	11.242255407655	14.6391429185629
N.A.	XLOC_018529	krab-a domain-containing protein	nd	♀	5.03428360261309	N.S.	N.S.	3436.69083424089	650.158604155402	878.493220615278
Smp_142040	XLOC_032574	myb-like dna-binding domain containing protein	nd	♀	3.98434280482011	N.S.	N.S.	155.418622178339	170.892781934554	90.4146453379625
Smp_071470	XLOC_001070	interferon regulatory factor 4	nd	♀	3.29793636304221	N.S.	N.S.	15355.9288585761	5492.8104962049	7284.6072050592
Smp_149680	XLOC_032988	early growth response	nd	♀	3.2421698946848	2.58094589650068	N.S.	597.794105050284	386.006502046017	462.118354113809
Smp_171160	XLOC_010252	paired amphipathic helix protein sin3a-like	nd	♀	3.17501741586679	N.S.	N.S.	6585.78897900326	4317.75075329438	4348.14143449621
Smp_074060	XLOC_011229	scm-relatedprotein containing 4 mbt domains	nd	♀	2.81047199452249	N.S.	N.S.	1975.35634255058	648.836913061122	975.843251687847
N.A.	XLOC_000967	transcription factor mrg-related	nd	♀	N.S.	N.S.	2.30322878306389	240.163637496544	248.610523888591	183.669218164116
Smp_130440	XLOC_029647	transcription initiation factor tfiid subunit 4-like	nd	♂	0.353367258875844	N.S.	N.S.	3585.32304994271	3559.43784180308	5836.51963756179
Smp_050740	XLOC_016403	general transcription factor 3c polypeptide 5	nd	♂	0.324345452257325	N.S.	N.S.	2263.44786920985	2761.28508753996	3247.75970671184
Smp_080520	XLOC_022720	transcriptional activator	nd	♂	0.321699637243362	0.371462198309076	0.467750865937886	6307.75978126963	5661.77242977145	7942.49320664023
Smp_147990.3	XLOC_005449	basic-leucine zipper transcription -containing protein	nd	♂	0.26856766691616	N.S.	N.S.	2084.52461957083	1893.28371099307	3392.10314709808
Smp_050570	XLOC_015016	taf9 rna polymerase tata box binding protein -associated factor	nd	♂	0.264524743516275	N.S.	N.S.	4032.33017797998	4905.11192805575	4774.05242371799
Smp_006810	XLOC_005308	lim domain transcription factor lmo4	nd	♂	0.237288250624619	N.S.	N.S.	3230.23821483103	5418.57749631923	5897.72660908653
N.A.	XLOC_007864	krab-a domain-containing protein	nd	♂	0.196382549225062	N.S.	N.S.	260.022107061602	104.181587826028	206.351594396638
Smp_072380	XLOC_002478	elongin b	nd	♂	0.163753132086926	N.S.	N.S.	6421.96895203081	7485.31681864814	8541.21847801257
Smp_134870	XLOC_013514	early growth response 1	nd	♂	0.133147319052869	N.S.	0.425360126960131	577.136933399342	959.992252381461	631.850015069462
Smp_172480	XLOC_020371	krueppel-like factor partial	nd	♂	0.0391370210815081	N.S.	N.S.	471.883880749246	2671.25029448084	826.059154469539
Smp_178750	XLOC_025906	Transcription initiation factor IIE	nd	♂	N.S.	0.217107376348549	N.S.	1876.81017143582	1828.64240611224	1539.62778951549	100*
Smp_026270	XLOC_011788	early growth response protein	nd	♂	N.S.	0.44688887935043	N.S.	2810.42012835119	2638.12037460477	3484.78479316319
Smp_119310	XLOC_015064	tata-binding protein 10	nd	♂	N.S.	0.444959343975181	N.S.	7826.86821522917	9021.34875207664	7903.9985401465
Smp_068220	XLOC_025849	bhlhzip transcription factor max bigmax	nd	♂	N.S.	0.385084118193769	N.S.	7302.28295538655	11326.270620274	9348.83658775098
Smp_136480	XLOC_027392	ccaat-box dna binding protein subunit b	nd	♂	N.S.	0.374200715137112	N.S.	811.064310313731	183.268523653649	906.950550881983
Smp_158050	XLOC_029989	probable global transcription activator snf2l2	nd	♂	N.S.	0.367073464365718	N.S.	4820.61162273557	5940.99570427503	5149.82164365668
Smp_179000	XLOC_010511	phd and ring finger domain-containing protein 1	nd	♂	N.S.	0.360857993075239	N.S.	2087.03400176857	2911.24816678837	2187.05639664299
Smp_009710.3	XLOC_031899	general transcription factor 3c polypeptide 3	nd	♂	N.S.	0.357712059632269	N.S.	3371.0034788035	2696.2919347439	3001.38410922912
Smp_081570	XLOC_014666	ebna2 binding protein p100	nd	♂	N.S.	0.350254780893318	N.S.	3355.36498045306	7441.03110844786	4963.1449595997
Smp_011980	XLOC_025611	general transcription factor iih subunit 1-like	nd	♂	N.S.	0.334086327851312	N.S.	1256.1490541399	1714.58754084252	1383.17306289683
Smp_204380	XLOC_027677	basic-leucine zipper transcription -containing protein	nd	♂	N.S.	0.330972914964339	0.437488103570982	2684.55710675025	1593.45782460688	2771.16879632047
Smp_011860	XLOC_023112	transcription factor lcr-f1	nd	♂	N.S.	0.294341456166565	0.527301545285358	4331.71571322024	3006.45677426629	4008.78067701974
Smp_011720	XLOC_023093	phd finger-like domain-containing protein 5a-like	nd	♂	N.S.	0.289421819290525	0.514084655315446	2260.52894398094	3700.42893042817	2530.45945212111
Smp_137530	XLOC_027741	tata element modulatory factor	nd	♂	N.S.	N.S.	0.498112587637716	1570.9936747552	700.012752585518	1726.45090463568
Smp_068270	XLOC_023184	heat shock transcription factor	nd	♂	N.S.	N.S.	0.487433686326173	6636.95303086578	3563.88830944816	5725.43226565675
Smp_210960	XLOC_026002	transcription initiation factor tfiid subunit 13-like	nd	♂	N.S.	N.S.	0.411632514443905	2282.32967337102	1228.80095284517	2263.36067014447
Smp_067430	XLOC_030206	oligodendrocyte transcription factor 3-like	nd	♂	N.S.	N.S.	0.259132602763894	47.9244729613651	4.12557213110397	33.5290170892903
Smp_130870	XLOC_017114	ets domain-containing protein elk-1	nd	♂	N.S.	N.S.	0.213797993434121	11.4471629099199	4.85147452976657	21.6420085427065
Smp_126530	XLOC_005108	protein c-ets-2-a	nd	♂	N.S.	N.S.	0.210744648998215	230.567379481766	27.7533251300322	265.53071599038
TRANSCRIPTION: TRANSCRIPTION ASSOCIATED PROTEINS					#N/A	#N/A	#N/A
Smp_054430	XLOC_026738	transcriptional repressor scratch 2	nd	♀	34.7217161910365	N.S.	N.S.	32.8124915267084	15.049760971332	2.5830051004808
Smp_055740	XLOC_017435	nanos homolog 1	nd	♀	N.S.	N.S.	4.17989702887886	61.9983093375725	95.186836994636	195.62927618968
Smp_051920.2	XLOC_014865	nanos homolog 1	nd	♀	N.S.	N.S.	2.77527289012993	1310.28463689739	1945.52660612924	1594.79271832711
Smp_168810	XLOC_007340	ga-binding protein alpha chain-like	nd	♀	2.91667966666987	N.S.	N.S.	3252.12765708628	3078.03754161446	2264.72867125623
Smp_057630	XLOC_031344	activating signal cointegrator 1 complex subunit 1	nd	♂	0.351277222078666	0.427156239808646	0.437940561471453	3411.09529485034	2413.0900444938	3680.64119455242
Smp_008120	XLOC_005103	mediator of rna polymerase ii transcription subunit 6-like	nd	♂	0.323845616180038	N.S.	N.S.	1479.3616218309	2527.67172178419	2143.27915493021
Smp_123930	XLOC_000391	mediator of rna polymerase ii transcription subunit 21-like	nd	♂	0.284842363551895	N.S.	N.S.	3575.79313736885	5301.85516821429	5281.74956603113
Smp_080420	XLOC_025921	jun-related protein	nd	♂	0.184268565094559	0.300673341347859	0.331203620590976	3547.51319651374	2555.89369495401	4156.94014928344
Smp_008440	XLOC_004629	dna-directed rna polymerase ii subunit l	nd	♀	N.S.	4.06261324800684	N.S.	146.435339045846	113.078105150603	103.443892813252
Smp_161370	XLOC_005543	deoxynucleotidyltransferase terminal-interacting protein 1	nd	♀	N.S.	2.3714794646876	N.S.	582.588927829665	357.073527817861	829.613595211716
Smp_103540.2	XLOC_017850	activator protein 4	nd	♂	N.S.	0.451600836333426	N.S.	4079.12805792942	5698.07564000918	3564.97763949374
Smp_128840	XLOC_009957	dna-directed rna polymerase ii 19 kd polypeptide rpb7	nd	♂	N.S.	0.449740308802134	N.S.	836.249326742772	1252.71797373477	762.779527983959
Smp_012900	XLOC_001053	fuse-binding protein-interacting repressor siahbp1	nd	♂	N.S.	0.396325129248253	N.S.	2988.98467248571	3842.25592445476	2505.92428719192
Smp_126370	XLOC_025105	dna-directed rna polymerases and iii subunit rpabc1	nd	♂	N.S.	0.379372943905441	N.S.	2218.69706306901	2660.21819799324	1762.91679327794
Smp_170060	XLOC_025961	negative elongation factor partial	nd	♂	N.S.	0.371335630528373	0.533629956343116	3447.50836837972	3706.41798589475	2967.79644244412
Smp_075120	XLOC_012827	pur-alpha-like protein	nd	♂	N.S.	0.360540525344809	N.S.	3214.6976790645	8788.75498379414	4429.73715088311
Smp_030440	XLOC_029379	c-myc-binding protein (associate of myc 1)	nd	♂	N.S.	0.316467342859427	N.S.	1241.45168215124	1235.104232659	1717.43262130837
Smp_174370	XLOC_029388	dna-directed rna polymerase iii subunit rpc8 isoform x1	nd	♂	N.S.	0.304458908388063	0.458511660035422	1015.01996703033	1209.79276168221	982.72500033974
Smp_153760.2	XLOC_025302	DNA directed RNA polymerase III subunit	nd	♂	N.S.	0.22705946727251	0.475915686117678	2545.98586819723	4665.29696591571	2754.09401657482	100*
Smp_067520	XLOC_025243	jun-related protein	nd	♂	N.S.	N.S.	0.47130111389349	1475.22335076712	1569.16113478572	2127.67080245723
Smp_212330	XLOC_020074	dna-directed rna polymerase iii largest subunit	nd	♂	N.S.	N.S.	0.277431327035266	1158.2266814039	178.562897020852	926.075472936284
Smp_144540	XLOC_002011	fez family zinc finger protein 2-like	nd	♂	N.S.	N.S.	0.0971869869892202	32.7331333162237	3.84732382820782	12.477747849816
mRNAs PROCESSING: SPLICING MACHINERY & FACTORS					#N/A	#N/A	#N/A
Smp_143920	XLOC_018681	integrator complex subunit 9	5	♀	3.53156316116475	N.S.	N.S.	3028.65431163199	1586.36316980297	1886.71170063358
Smp_035310	XLOC_003821	sfrs11 protein	1	♀	3.39272378720492	N.S.	N.S.	14460.2051639834	8350.33953725706	7259.59233050864
Smp_141630	XLOC_001666	splicing factor 3b subunit 1	1	♀	2.91579186956834	N.S.	N.S.	19729.4915470235	12169.2003984513	10166.3473627499
Smp_005160	XLOC_001561	muscleblind-like protein 3	1	♂	0.348185318351948	N.S.	N.S.	3023.21217854616	3697.77159302695	5228.20271288901
N.A.	XLOC_020022	beta-catenin-like protein 1	6	♂	0.325547559540992	N.S.	N.S.	933.706637244676	1147.63172821251	1331.4565614725
Smp_164470	XLOC_022759	pre-mrna-processing factor 6	Z2	♂	0.295671947003707	0.285554922010119	N.S.	3210.48548991547	4832.37954695676	4609.64462663181
Smp_019690	XLOC_031937	Splicing factor U2AF (U2 small nuclear ribonucleoprotein auxiliary factor)	SC_0187	♂	0.272202772121408	0.172272496629263	N.S.	7451.58663162786	15981.0853755719	8173.82376794097
Smp_039810	XLOC_027208	muscleblind-like protein	PSA4	♂	0.0888155929243773	N.S.	N.S.	505.866585775613	432.651289943662	833.067585308653
Smp_093100	XLOC_022226	splicing factor u2af 35 kda subunit isoform x2	Z1	♂	N.S.	0.489868808830962	N.S.	6181.04536147035	5853.56986019647	5312.7357254816
Smp_059360	XLOC_029827	pre-mrna-splicing factor 18-like	SC_0129	♂	N.S.	N.S.	0.413487729403307	3177.5430267743	1458.38938258339	2506.20389717596
Smp_135740	XLOC_019477	splicing factor 3b subunit 5	6	♂	N.S.	0.45645588385874	N.S.	3642.9937179971	8599.2440930384	4719.56769805086
Smp_069880	XLOC_018040	u1 small nuclear ribonucleoprotein a	5	♂	N.S.	0.455110203356681	N.S.	3253.82695122476	5167.58357856157	3501.14893718437
Smp_105860	XLOC_013050	ski interacting protein	3	♂	N.S.	0.455014608733513	N.S.	4932.12594096578	3778.55946915151	3349.31761167886
Smp_017890	XLOC_026292	u4 tri-snrnp-associated protein 2 isoform x2	PSA4	♂	N.S.	0.452833105002596	N.S.	3373.42554750029	3555.6685227797	3271.15672825521
Smp_075560	XLOC_027457	small nuclear ribonucleoprotein sm d2	PSA4	♂	N.S.	0.446871453147559	N.S.	3682.63084966461	7706.67362783966	5194.02043921083
Smp_064590	XLOC_024759	splicing factor	Z1	♂	N.S.	0.445572505089051	N.S.	8380.81293395728	7052.77172477733	6268.67564519142
Smp_104660	XLOC_028712	nhp2 non-histone chromosome protein 2-like 1	SC_0049	♂	N.S.	0.442856812690283	N.S.	2142.28312216786	4785.87972617464	2493.9950395988
Smp_021540	XLOC_021876	splicing factor 1-like	PSA1	♂	N.S.	0.439083044389283	N.S.	3459.66906521585	4013.34076887547	2840.46987383588
Smp_152740	XLOC_004633	u3 small nucleolar rna-associated protein 4	1	♂	N.S.	0.428726840247753	N.S.	1060.09991335663	1775.06135887346	892.27564121845
Smp_032320.6	XLOC_024342	fus-interacting serine-arginine-rich protein 1	PSA4	♂	N.S.	0.415689676490662	N.S.	9003.59067623751	13529.3610024056	7268.39326056965
Smp_179270.3	XLOC_018928	heterogeneous nuclear ribonucleoprotein	6	♂	N.S.	0.41327244025845	N.S.	4190.78118268115	6394.11007461207	4828.63077305249
Smp_141330	XLOC_000613	u2 small nuclear ribonucleoprotein a	1	♂	N.S.	0.407790515414346	N.S.	2296.69309186145	4569.05828455392	2640.18038543616
Smp_054600	XLOC_032401	pre-mrna-splicing factor spf27-like	SC_0214	♂	N.S.	0.401771949441315	N.S.	1691.80863163278	4526.76789686626	2789.64807183942
Smp_113620.3	XLOC_009795	splicing arginine serine-rich 2	2	♂	N.S.	0.383996353110272	N.S.	4008.34208194163	11482.8786580799	5448.61546139232
Smp_009400	XLOC_019799	serine arginine repetitive matrix protein 2	6	♂	N.S.	0.379373411218264	N.S.	3823.05377085954	5490.4735292742	3850.30627499165
Smp_098890.2	XLOC_014497	splicing arginine serine-rich 7	3	♂	N.S.	0.375669871638364	N.S.	6506.35655068783	19523.9066657321	9257.66208053194
Smp_170570	XLOC_005866	pre-mrna processing protein prp39-related	1	♂	N.S.	0.374446437835421	N.S.	4395.40401340065	10249.3150671198	5597.32926671401
Smp_096810	XLOC_007344	splicing factor 3b subunit 2	1	♂	N.S.	0.361071198288764	N.S.	4584.81908787213	5359.88880065654	5858.61832884574
Smp_071640	XLOC_024185	arginine serine-rich splicing factor	PSA4	♂	N.S.	0.347227391489804	N.S.	7012.91242616168	14005.9309750882	7843.00388028166
Smp_036270	XLOC_001685	arginine serine-rich splicing factor	1	♂	N.S.	0.341775378908089	N.S.	18871.9723354263	48735.3356548645	26614.7167404995
Smp_068420	XLOC_007775	small nuclear ribonucleoprotein sm d3	2	♂	N.S.	0.341044912687091	N.S.	4783.92103211977	15935.714189028	5788.19933243471
Smp_043100	XLOC_016739	heterogeneous nuclear ribonucleoprotein a2 b1 homolog	4	♂	N.S.	0.334985284883509	N.S.	9692.27214654378	21336.6731558963	10095.2815952294
Smp_180070	XLOC_026001	gem-associated protein 5	Z3	♂	N.S.	0.333068485710509	0.5242008268192	1642.83588776684	2333.18396809427	1803.45124756237
Smp_076880	XLOC_027983	splicing factor 3a subunit 2	SC_0013	♂	N.S.	0.328494325403003	N.S.	2929.61398634767	6176.65626214398	3099.33568841429
Smp_046980	XLOC_026073	pre-mrna-splicing factor 38a	Z3	♂	N.S.	0.316805578380752	N.S.	1778.8867631882	2947.11965607823	1637.17990316315
Smp_011710	XLOC_025771	a1 cistron-splicing factor partial	Z3	♂	N.S.	0.316029429777167	N.S.	3016.32660469466	3641.59420222562	2787.93638546904
Smp_069870	XLOC_018039	u1 small nuclear ribonucleoprotein a	5	♂	N.S.	0.301255393288455	N.S.	1919.73963114758	5105.37664943025	2340.33251357205
Smp_053940	XLOC_017499	heterogeneous nuclear ribonucleoprotein a2 homolog 1	4	♂	N.S.	0.293672066527396	N.S.	7921.8001473597	20997.8156361143	9987.18270488787
Smp_091300	XLOC_034346	u1 small nuclear ribonucleoprotein c	SC_0622	♂	N.S.	0.2886129309541	N.S.	1529.84959876533	3547.46082805026	1934.17063067842
Smp_025130	XLOC_026507	pre-mrna-splicing factor rbm22	PSA4	♂	N.S.	0.287593206585072	N.S.	1873.60242214811	4185.06442432363	2232.34743247929
N.A.	XLOC_006780	fus-interacting serine-arginine-rich protein 1	1	♂	N.S.	0.286611938076686	N.S.	137.702465525554	344.213369052739	96.5442514755433
Smp_016990	XLOC_027559	methylosome subunit picln	PSA4	♂	N.S.	0.279887734602088	N.S.	1385.64455866804	3417.40742597182	1528.51742284573	100*
Smp_005860	XLOC_004980	heterogeneous nuclear ribonucleoprotein k	1	♂	N.S.	0.275322814594823	N.S.	6423.50952486365	7584.32575335092	2811.41609925889
Smp_137430	XLOC_027706	splicing factor 3b subunit 3	Zwunplaced	♂	N.S.	0.269464982350663	N.S.	4699.37241756326	8412.80918349263	4933.89635128546
Smp_067420	XLOC_030263	splicing factor subunit 49kda	SC_0142	♂	N.S.	0.250940262265623	N.S.	946.443112428291	2794.08035161831	1143.57995604088
mRNAs PROCESSING: POST-SPLICING CONTROL & MODIFICATIONS					#N/A	#N/A	#N/A
Smp_152440	XLOC_029221	hiv tat-specific factor 1	SC_0097	♀	3.00274534333244	N.S.	N.S.	3364.43545039893	1769.44081584834	1868.5415717759
Smp_135540	XLOC_016630	protein vts1	4	♀	5.12242170037312	N.S.	N.S.	3076.64700633094	841.738650739622	1113.4090798459
N.A.	XLOC_007405	rna-binding protein 38	1	♀	3.77106336117498	N.S.	N.S.	135.519689158414	56.3357757325803	86.006611667438
Smp_142220	XLOC_028506	apobec1 complementation factor	SC_0041	♂	N.S.	N.S.	0.0405470705095425	29.6987322109424	1.90071411255695	24.4566535297443
Smp_031360.2	XLOC_022203	nuclear cap binding protein subunit 1	Z1	♂	N.S.	0.232191936691935	N.S.	5887.43846162133	9638.06612299499	5310.83778883429	100*
Smp_147360	XLOC_026075	Cleavage stimulation factor subunit 3	Z3	♂	N.S.	0.223596978133643	0.53526627207535	2163.36526220884	4754.36751467925	2512.3361670138	100*
Smp_045250	XLOC_009780	cleavage stimulation factor 50 kda subunit	2	♂	N.S.	0.448700896950734	N.S.	849.667583784976	1197.14980486637	801.3509883011
Smp_137460	XLOC_014187	cytoplasmic polyadenylation element binding protein	3	♂	N.S.	N.S.	10.060213410393	2.05130258889985	1.66177303580912	25.7955469579895
Smp_140100	XLOC_021566	double-stranded rna-binding protein zn72d	7	♂	N.S.	0.388016211716285	N.S.	4559.06090166839	6775.51358920574	5497.99070288616
Smp_062720	XLOC_027159	e1b-55kd-associated protein	PSA4	♂	N.S.	0.279768353828252	N.S.	21372.282884255	39060.6936071656	22596.0748911026
Smp_151690	XLOC_010000	endoribonuclease l-psp	2	♂	N.S.	0.291592198223706	N.S.	407.169181055222	238.138906837088	292.424127284532
Smp_064260	XLOC_030124	exosome complex exonuclease rrp4	SC_0137	♂	N.S.	0.41999127644468	N.S.	1331.87133450657	2743.13678265273	1693.71827808102
Smp_058170.2	XLOC_026218	fragile x mental retardation 1 isoform 16	PSA4	♂	N.S.	0.32929045718058	N.S.	10497.7808005311	15430.2426690199	12769.4565845129
Smp_098330	XLOC_004005	h aca ribonucleoprotein complex subunit 2	1	♂	N.S.	0.453395677500303	N.S.	2931.14233358816	6661.03540492923	3516.87463546401
Smp_006190	XLOC_025328	mrna decapping	Z1	♂	N.S.	0.270878915772142	0.362350491407294	3411.42598959725	3046.08848044596	3169.91019801544
Smp_060170	XLOC_026784	mrna export factor	PSA4	♂	N.S.	0.424347732525634	N.S.	1386.6864601881	2467.07630051708	1631.81314645914
Smp_009310	XLOC_020764	plasminogen activator inhibitor 1 rna-binding protein	6	♂	N.S.	0.437511366983995	N.S.	53048.3607090924	93192.8775283008	77776.3870403847
Smp_024140.4	XLOC_026648	polyadenylate binding protein	PSA4	♂	N.S.	0.406268067788935	N.S.	34040.9315295687	77197.085360188	44072.0652126128
Smp_007630	XLOC_025133	Polyadenylate-binding protein 2 putative	Z1	♂	N.S.	0.204876923144113	0.387471789969656	5577.17073162854	9721.84652473249	5740.09864014177	100*
Smp_128420	XLOC_025776	protein casc3	Z3	♂	N.S.	0.230083095011558	0.424830887597833	2024.07907770289	2057.51955398995	2026.24817198749
Smp_102450	XLOC_024967	RNA 3' terminal phosphate cyclase protein	Z1	♂	N.S.	0.217576232417971	0.533456384501977	3808.53775593077	6144.81118716348	4400.03703497561	100*
Smp_000240	XLOC_013935	rna binding	3	♂	N.S.	0.38288659105196	N.S.	13733.7036562955	24152.3056161863	13885.6339218684
Smp_104450	XLOC_031509	rna pseudouridylate synthase	SC_0178	♂	N.S.	N.S.	0.0593547193281034	95.1421200931643	0.799556693336419	58.8608753312535
Smp_041480.2	XLOC_021838	rna recognition motif domain containing protein	7	♂	N.S.	0.328240245932304	N.S.	3962.09736631726	8748.25192512491	6314.81926116336
Smp_103990	XLOC_005899	rna-binding protein 42-like isoform x1	1	♂	N.S.	0.380459283678239	N.S.	1625.35278317756	2007.5628241132	2075.47796120025
Smp_131640	XLOC_010686	rna-binding protein musashi-related	2	♂	N.S.	N.S.	2.55408803016661	252.316209355317	222.209794212314	505.71695770326
Smp_030830.2	XLOC_020195	rna-binding ras-gap sh3 binding protein related	6	♂	N.S.	0.42844991143858	N.S.	7011.56820570742	18335.3851793716	9823.85843373595
Smp_212530	XLOC_029835	superkiller viralicidic activity 2-like 2	SC_0129	♂	N.S.	0.477644799816675	0.462284465997641	6560.97758043206	4697.21152535677	5999.03961116882
Smp_059250	XLOC_029778	superkiller viralicidic activity 2-like 2- partial	SC_0129	♂	N.S.	0.431300300030756	0.387632745851157	1496.62740881167	805.327750809629	1314.32891992195
Smp_120360	XLOC_033896	superkiller viralicidic activity 2-like 2-like isoform 1	SC_0351	♂	N.S.	0.275786677095103	N.S.	2880.61122578778	5204.8440787585	2792.79555127987
Smp_095140	XLOC_022701	thump domain-containing protein 1 homolog	Z2	♂	N.S.	0.348178246253156	0.448443439897234	972.474647888226	1192.16459337288	923.263521942602
Smp_166190	XLOC_017033	tia1 cytotoxic granule-associated rna binding protein	4	♀	N.S.	N.S.	2.45918002082777	222.345275150207	59.1559799147192	299.528560235413
Smp_157680	XLOC_026397	u6 snrna-associated sm-like protein lsm4	PSA4	♂	N.S.	0.402033427600568	N.S.	1732.66239772616	2669.43940865917	1685.26466050207
Smp_102240	XLOC_022467	upf3 regulator of nonsense transcripts-like protein	Z1	♂	N.S.	0.294317303862012	0.39927955534744	2256.38380997841	2288.35403235436	2769.85780859862
N.A.	XLOC_026769	yth domain-containing protein 1	PSA4	♂	N.S.	0.377305043776757	N.S.	7363.35720333142	5599.31042768271	6387.91051947472
Smp_046780	XLOC_010175	plasminogen activator inhibitor 1 rna-binding protein	2	♂	0.338571214571744	0.356488967683486	N.S.	1727.57152051486	3146.1394429636	2450.92504209004
Smp_007190	XLOC_004585	lariat debranching enzyme	1	♂	0.33347354459907	N.S.	N.S.	1603.56748169192	1903.36059468929	2042.42489300063
Smp_171860	XLOC_022666	held out isoform f	Z2	♂	0.32528911291703	N.S.	0.318798574929694	1828.6772908842	778.689338118233	2185.63682213745
Smp_099630	XLOC_009696	fragile x related 1 frx1	2	♂	0.287437565618164	0.309291122823245	N.S.	6122.8889357074	8397.31878192615	9322.92974625989
Smp_129210	XLOC_031765	aminoacyl trna synthase complex-interacting multifunctional protein 1 (AIMP1)	SC_0183	♂	0.270395071523901	N.S.	N.S.	2236.15810992761	1950.59161042449	3459.99249338278
Smp_072370	XLOC_005532	rna polymerase-associated protein ctr9 homolog	1	♂	0.25098887492575	N.S.	N.S.	2828.74557460476	3473.0534482859	4705.73230976296
Smp_134370	XLOC_025161	rna 3 -terminal phosphate cyclase	Z1	♂	0.245797448842985	0.288229108229592	0.367150154188219	1942.10111892947	1962.75224446658	2198.51744178676
Smp_130750	XLOC_025716	enhancer of mrna-decapping protein 4-like isoform x2	PSA3	♂	0.219153777634082	N.S.	N.S.	3734.97030239699	2422.86874010314	5833.3988000612
Smp_012110	XLOC_022858	exosome complex component RRP41	Z2	♂	0.201939525076484	0.24913461123902	0.437516317341108	4684.56157990905	7035.59094016108	5762.81566714217	100*
N.A.	XLOC_022382	protein kri1 homolog	Z1	♂	0.187101176152729	0.360667329320794	N.S.	2194.18968647668	2198.79932894428	3148.39470393761
Smp_157590	XLOC_005863	protein vts1	1	♂	0.183543093882871	N.S.	N.S.	2352.8237189403	2278.57224994454	4317.09731561369
Smp_144450	XLOC_032917	apobec-1 complementation factor-related	SC_0237	♂	0.168079466476311	N.S.	0.417891518365243	951.903192713412	304.89141727587	1637.39598312089
Smp_132270	XLOC_012693	poly binding protien	3	♂	0.104510623268844	N.S.	0.425683884734862	1917.68256476172	501.623629587594	2887.01274116865
Smp_194950	XLOC_015901	rna-binding protein isoform e	4	♂	0.0083636910214078	N.S.	0.31386298449286	115.347027888878	11.9329800695859	124.001137238198
miRNA PROCESSING					#N/A	#N/A	#N/A
Smp_033600	XLOC_010793	DICER 2	2	♂	0.338387191111244	N.S.	N.S.	2168.99981623133	2836.33744856578	3357.37607370584	sc_0108
Smp_118190	XLOC_014685	staphylococcal nuclease domain-containing protein 1-like	3	♂	N.S.	N.S.	0.294083430454966	39.3293297846316	91.0390064028326	65.9146678078302	3
NUCLEOTIDE BINDING PROTEINS					#N/A	#N/A	#N/A
Smp_155920	XLOC_024286	kh domain-containing protein	nd	♂	0.311948529622011	N.S.	N.S.	4276.51682790155	4706.62807194805	6472.12873260386
Smp_210390	XLOC_005616	nucleotide binding protein 2 (nbp 2)	nd	♂	N.S.	0.436907068374013	N.S.	3023.03734514732	3960.68934269498	2733.43883072247
Smp_165770	XLOC_025876	nucleotide-binding protein 1 (nbp 1) nbp35	nd	♂	N.S.	0.429658012570012	N.S.	481.983817628639	599.52615252072	442.168155293147
Smp_006320	XLOC_022462	KH RNA-binding domain containing protein	nd	♂	N.S.	0.251891117403094	N.S.	6561.57451104274	17472.4780842098	7568.06205358547	100*
Smp_172270	XLOC_006757	protein ccr-4	nd	♂	N.S.	N.S.	0.526670705028007	2767.81977772484	2538.24300984371	2866.46932708816
NUCLEUS MEMBRANE PROTEINS					#N/A	#N/A	#N/A
N.A.	XLOC_015073	Hypothetical nuclear membrane protein	nd	♀	713.726840256712	N.S.	N.S.	147.690746431119	8.67422228878547	0.895672702261239	100*
Smp_032510	XLOC_024303	importin beta-3	nd	♂	0.341128350956239	N.S.	N.S.	4997.22705586056	8373.35035194696	7606.5014725651
Smp_137650	XLOC_007808	exportin-t isoform x1	nd	♂	0.267497398293449	N.S.	N.S.	3011.11127904051	2979.17467251262	4630.20080408107
Smp_142340	XLOC_026993	nucleoporin nup43-like	nd	♂	N.S.	0.467263812681795	N.S.	1379.77840310883	2759.40572481326	1631.80404182579
N.A.	XLOC_003260	nuclear rna export factor 1 2	nd	♂	N.S.	0.406273311004729	N.S.	1386.43614903779	1575.90176939476	1052.11337127754
Smp_091810	XLOC_006664	nuclear pore complex protein nup153	nd	♂	N.S.	0.310517256659309	N.S.	4470.03748988864	4886.84899144093	3263.36979288766
Smp_037700	XLOC_029995	nuclear transport factor 2	nd	♂	N.S.	0.229227848966579	0.541561273980284	8262.22521204346	14202.6557169178	7098.88761481256
Smp_103100	XLOC_023249	Nuclear pore complex protein Nup93	nd	♂	N.S.	0.209738390308464	0.452175860301697	1631.70162141611	2876.91277080628	1913.22188663061	100*
Smp_197760	XLOC_014560	Exportin 7	nd	♂	N.S.	N.S.	0.425520524956017	130.36314720886	102.920307915486	162.48682428837	100*

## Sheet: Sheet7 - miRNA
miRNA PRECURSORS (12 hits)
Gene ID (v5.2)	CuffLinks IDs	miRNA precursor	Chromosomal location	Sex of bias	Fold Change			Expression level average (rpkm)			Specific remarks
					Cercariae	Schistosomula S#2	Adults	Cercariae	Schistosomula S#2	Adults
N.A.	XLOC_024750	sma-mir-1a	PSA1	♀	24.6806175384792	N.S.	N.S.	149.979318417187	66.7536542883057	6.27282752814588
Smp_144790	XLOC_021781	sma-mir-8458	7	♀	11.7798637887656	N.S.	N.S.	735.224594185512	77.8261411048753	137.402063908057
N.A.	XLOC_004797	sma-mir-125c	1	♀	5.19856567624889	N.S.	N.S.	1002.0381867446	642.06570200949	410.184111430512
N.A.	XLOC_032455	sma-mir-8483	SC_0218	♀	N.S.	4.52684331091807	N.S.	52.1554725154697	84.1603145237297	102.039655291462
Smp_066520	XLOC_019312	sma-mir-8451	6	♀	N.S.	N.S.	4.98009651870956	29.5719636835839	69.8954275241281	26.2730258745298
Smp_180680	XLOC_025201	sma-mir-8459	Z1	♂	0.302331038144951	N.S.	0.356460671237712	443.985696490428	146.119593145165	589.227585142033
Smp_045360.3	XLOC_007976	sma-mir-8429	2	♂	0.179774582654854	N.S.	N.S.	5212.32178702563	5425.01004937757	9738.75271443429
Smp_137660	XLOC_009582	sma-mir-8428	2	♂	0.141161237375237	N.S.	N.S.	131.847644959047	473.964305676613	190.128705447642
Smp_144910	XLOC_017143	sma-mir-8446	4	♂	0.0514126885106657	0.280623080196606	N.S.	24010.9955355539	16182.6548815189	39725.0036724019
N.A.	XLOC_006836	sma-mir-125b	1	♂	0.0100881120948382	N.S.	N.S.	70.4449455347343	25.9763017657449	108.648096347994
Smp_210940	XLOC_022489	sma-mir-8465	Z1	♂	N.S.	N.S.	0.453262511751321	3993.59316199946	2583.86468661494	2751.05332277118
Smp_157930	XLOC_027304	sma-mir-8469	Z3	♂	N.S.	N.S.	0.528432635081225	1754.72696532914	1095.31069033063	2152.56567760709

## Sheet: Sheet8 - ProtSynt.&Processing
PROTEIN SYNTHESIS AND PROCESSING (291 hits)
Gene ID (v5.2)	CuffLinks IDs	Predictive product	Sex of bias	Fold Change			Expression level average (rpkm)			Specific remarks
				Cercariae	Schistosomula S#2	Adults	Cercariae	Schistosomula S#2	Adults
TRANSLATION RELATED PROTEINS: t-RNA PROCESSING				#N/A	#N/A	#N/A
Smp_040560	XLOC_005989	cytoplasmic trna 2-thiolation protein 1	♀	3.19833655870636	N.S.	N.S.	840.707751131849	221.329768254497	340.638842021371
Smp_192180	XLOC_026056	cdk5 regulatory subunit-associated protein 1-like	♂	N.S.	0.267844098135988	N.S.	830.16362076459	929.524309246583	842.254856473937
Smp_180320.2	XLOC_033331	threonyl-trna synthetase	♂	N.S.	N.S.	0.0567347702510887	190.759570905675	12.3016683725642	128.48994821808
Smp_138930.2	XLOC_019225	glutamyl-trna cytoplasmic (glutamate--trna ligase)	♂	N.S.	0.439016445475892	N.S.	5268.8121052411	8638.28096476692	6317.71482162429
Smp_150780.2	XLOC_025503	queuine trna-ribosyltransferase	♂	N.S.	0.426369079762141	N.S.	2761.21891296533	2316.00391395314	2719.46257635801
Smp_074870	XLOC_012849	trna-splicing ligase homolog	♂	N.S.	0.423981064612536	N.S.	3500.13669080382	4644.75897040176	4282.86203733529
Smp_200330	XLOC_003516	threonyl-trna synthetase	♂	N.S.	0.406217437228155	N.S.	2509.52876043846	7707.46939466665	3048.71076544399
Smp_064640	XLOC_021897	trna selenocysteine associated protein	♂	N.S.	0.402198774505623	N.S.	3514.55854471233	6224.28395475702	2977.51700485829
Smp_023360	XLOC_012292	histidyl-trna synthetase	♂	N.S.	0.380582417237714	N.S.	6658.64551472159	15198.8066479223	9286.18547081089
Smp_040800	XLOC_012190	glycyl-trna synthetase	♂	N.S.	0.377122720248158	N.S.	16944.5730695466	7318.98687998575	8640.06221180996
Smp_082860	XLOC_008256	tryptophanyl-trna synthetase	♂	N.S.	0.372788812055727	N.S.	2009.9740032869	3854.06478125264	2382.53506712153
Smp_031040.2	XLOC_025031	zinc phosphodiesterase	♂	0.339567919148971	0.366302024396286	0.472770958881362	2431.37559962671	2723.83948342969	2936.74313890747
Smp_123990	XLOC_003517	threonyl-trna synthetase	♂	0.271761942492158	0.264938249823157	N.S.	1230.71351521534	2945.08268466801	1642.29897085113
Smp_211080	XLOC_014516	trna 2-selenouridine synthase	♂	0.246506422971459	N.S.	N.S.	1141.75328983306	640.187635430089	1435.26306160031
Smp_053610	XLOC_016791	seryl trna synthetase	♂	0.21924270623288	N.S.	N.S.	5868.49454321914	9986.69541113484	8631.0879738455
Smp_040770	XLOC_013481	methionine-trna synthetase	♂	0.211183711858638	N.S.	N.S.	1522.9610541512	1888.00155825621	1952.86734637898
Smp_073990	XLOC_031319	probable trna guanylyltransferase-like	♂	0.199425919828012	N.S.	N.S.	558.977792577512	408.904003774745	609.358423528304
Smp_136350	XLOC_013157	ribonuclease p mrp protein subunit pop5	♂	0.178496449091682	N.S.	N.S.	370.830010125852	580.14454041314	414.842531483011
N.A.	XLOC_031555	peptidyl-trna hydrolase domain containing 1	♂	0.0952180183463838	N.S.	0.0421073715188143	22.2233916309803	0.834255198991798	13.211744097144
N.A.	XLOC_025691	probable trna threonylcarbamoyladenosine biosynthesis protein osgep	♂	0	N.S.	N.S.	8.31984884894102	0.994166537659082	19.3079294625446
TRANSLATION RELATED PROTEINS: RIBOSOMAL MACHINERY				#N/A	#N/A	#N/A	#N/A	#N/A	#N/A
Smp_051130	XLOC_020591	60s ribosomal protein	♀	7.60510969392448	N.S.	N.S.	330.631923186203	72.4721547054124	139.229456935541
N.A.	XLOC_023001	eukaryotic release factor 3-related (hbs1-like)	♀	4.95283267734031	N.S.	N.S.	99.6010023753942	47.4336910734177	70.9198658368429
Smp_148540	XLOC_005458	elongation factor ts	♀	2.90897256248053	N.S.	N.S.	7152.21000367397	5578.81769274145	3601.14338771595
Smp_053830	XLOC_016158	ribosomal protein s14	♀	2.70564817884887	N.S.	N.S.	23578.9236555452	36048.1043114821	14726.190814513
Smp_005080	XLOC_001548	nucleolar protein nol1 nop2	♀	2.64666813372452	N.S.	N.S.	1695.81581558822	1861.26010155852	1134.06826976041
Smp_034190	XLOC_007723	eukaryotic initiation factor 4a-iii-like	♂	N.S.	0.472963472906502	N.S.	10985.0087008234	18857.5887902966	11736.121958387
Smp_122840	XLOC_011007	eukaryotic translation initiation factor 5	♂	N.S.	0.472259561869021	N.S.	44191.7699620162	43239.9018291955	54168.43526959
Smp_148990	XLOC_017622	nucleolar protein 5	♂	N.S.	0.466557606514325	N.S.	2364.66275193747	5828.34207025685	3035.95010672403
Smp_136290	XLOC_018354	eukaryotic translation initiation factor subunit 7 zeta	♂	N.S.	0.465963157230132	N.S.	12672.4688852748	14764.3818999384	10881.1798205611
Smp_012980	XLOC_013126	eukaryotic translation initiation factor 3 subunit j-a-like	♂	N.S.	0.442222062131621	N.S.	3815.11160439967	4042.94917741379	4426.63965875467
Smp_154690	XLOC_004884	ribosomal protein related	♂	N.S.	0.432996714457525	N.S.	2417.92305822652	3710.79313519359	3489.80679231645
Smp_017280	XLOC_009118	small subunit ribosomal protein s27ae	♂	N.S.	0.431876611322302	N.S.	11418.6792953428	25308.8262224474	14693.5727340438
Smp_009320.2	XLOC_019814	elongation factor siii p15 subunit	♂	N.S.	0.42395547012753	N.S.	1744.73493539793	1924.9912261134	2785.35659701145
Smp_171670	XLOC_022083	ddb1- and cul4-associated factor 11-like isoform x1	♂	N.S.	0.421581270634197	0.458702167728135	3757.2612634461	2304.69882731089	3158.48746136246
Smp_073080.2	XLOC_001174	rrna processing protein	♂	N.S.	0.417243181164213	N.S.	1282.99683208096	2511.39722962497	1452.91348496064
Smp_073500.2	XLOC_003623	elongation factor tu (ef-tu)	♂	N.S.	0.415746502364652	N.S.	7307.75767825012	11302.0400727664	8065.83676450268
Smp_058460	XLOC_027893	eukaryotic translation initiation factor 3 subunit 9	♂	N.S.	0.413962055435967	N.S.	3738.51933017556	7178.46752633381	5179.68889335452
Smp_051260	XLOC_028859	60s ribosomal protein l8	♂	N.S.	0.408103118440557	N.S.	18072.530861416	55885.889907544	24289.8998347153
Smp_006000	XLOC_004961	eukaryotic translation initiation factor 3 subunit i	♂	N.S.	0.407032272630719	N.S.	3041.2998037481	5442.6203466447	3494.57108297821
Smp_210570	XLOC_001779	eukaryotic translation initiation factor subunit 3 gamma	♂	N.S.	0.406851385467804	N.S.	3349.39120483208	5523.35807254497	4106.12121388387
Smp_084460	XLOC_022947	ribosomal protein l28	♂	N.S.	0.405717797858833	N.S.	8667.15140050867	28134.7185606182	10187.5890453579
Smp_079490	XLOC_020295	eukaryotic translation initiation factor 4h	♂	N.S.	0.401607802969843	N.S.	4248.18635866068	7735.36690232175	4300.55750535377
Smp_047200	XLOC_026029	ribosomal protein l3	♂	N.S.	0.395490607584095	N.S.	22498.8407796913	58338.1092936665	29233.6079866374
Smp_087440	XLOC_032887	60s ribosomal protein	♂	N.S.	0.392582333504005	N.S.	1540.09038250986	3003.94917304716	2218.68438146734
Smp_093750.2	XLOC_023190	eukaryotic translation initiation factor 2 alpha subunit	♂	N.S.	0.384117670159704	N.S.	4017.27042082294	6464.51375673919	4806.7246559145
Smp_058680.2	XLOC_027859	ribosome biogenesis regulatory protein homolog	♂	N.S.	0.380479527839202	N.S.	1178.67152973459	2300.40755813191	1407.89213944102
Smp_018990	XLOC_013676	ribosomal protein l9	♂	N.S.	0.378338191605616	N.S.	16085.0728878839	31346.0463173999	12370.0538373584
Smp_073880	XLOC_031275	ribosomal protein s3a	♂	N.S.	0.377138074413055	N.S.	20233.7670089296	45073.4739272743	19378.6989679397
Smp_126910	XLOC_016475	periodic tryptophan protein 2 homolog	♂	N.S.	0.370069915225386	N.S.	1284.59677646155	2280.00660287257	1255.16899293918
Smp_032260	XLOC_029616	ribosomal protein l15	♂	N.S.	0.366825089171388	N.S.	13417.2865320869	37580.5714955418	14177.5710810878
Smp_153790	XLOC_016839	ribosomal protein l4	♂	N.S.	0.36353184432445	N.S.	25602.1628272938	60792.6464507356	22564.4625332913
N.A.	XLOC_033233	eukaryotic translation initiation factor	Switch	N.S.	0.362791668025448	4.08810221824009	1219.29757216124	5646.82041842629	1308.26989946544
Smp_198420	XLOC_026913	eukaryotic translation initiation factor 6	♂	N.S.	0.357891117042858	N.S.	3539.01464865235	6999.18506744228	4394.62503562107
Smp_098960	XLOC_014484	ribosomal protein l26 isoform 1	♂	N.S.	0.345931887268387	N.S.	10092.6695279913	33167.7708250819	14488.3803683712
Smp_044280	XLOC_008879	rrna 2 -o-methyltransferase fibrillarin	♂	N.S.	0.345455344523281	N.S.	1907.69392203146	6985.37626529349	2807.90117481628
Smp_083410	XLOC_027944	eukaryotic translation elongation factor 1 gamma	♂	N.S.	0.340255979417734	N.S.	12307.7236749253	44662.3295574926	15477.4184964464
Smp_001170	XLOC_006078	eukaryotic translation initiation factor 3 subunit 10	♂	N.S.	0.338058768649605	N.S.	5364.32957489444	9874.28892993166	7792.95341363415
Smp_040450	XLOC_012649	ribosome biogenesis protein wdr12 homolog	♂	N.S.	0.336964943695687	N.S.	1382.17143085719	2148.53987327646	1417.68755768507
Smp_143150	XLOC_014982	elongation factor 2	♂	N.S.	0.328792259349288	N.S.	34255.9923584978	82645.1369379795	41882.5178301677
Smp_099870	XLOC_005802	eukaryotic translation elongation factor 1 alpha 2	♂	N.S.	0.321663846530508	N.S.	119409.908814241	332995.066401932	152387.592845837
Smp_053470	XLOC_022681	nucleolar protein nop58	♂	N.S.	0.317077435959365	N.S.	846.668196892822	1319.04709634551	790.01344461546
Smp_003410	XLOC_000360	60s ribosomal protein l23a	♂	N.S.	0.313199321882913	N.S.	10357.9490688512	22788.5472110191	13527.7102687651
Smp_103460	XLOC_029802	eukaryotic translation initiation factor 2	♂	N.S.	0.309744773550566	N.S.	9540.22676773044	10788.8588145927	9299.12801218179
Smp_166550	XLOC_029339	translation initiation factor eif-2b subunit delta	♂	N.S.	0.309284939569687	N.S.	2459.44258092594	2703.37478023167	2312.11050022029
Smp_022640	XLOC_003310	ribosomal protein l13	♂	N.S.	0.30093184654736	N.S.	15329.3535944392	33855.2443161643	13816.4288101662
Smp_102840	XLOC_023089	30s ribosomal protein s2	♂	N.S.	0.283584964769095	N.S.	2947.39146328355	3752.14782334223	2822.83477874526
Smp_038510	XLOC_025892	60s ribosomal protein l6	♂	N.S.	0.278259084803243	N.S.	22027.2934828655	59995.3565775545	21982.3114233853
Smp_095150	XLOC_022702	eukaryotic translation initiation factor 2 gamma subunit (eif-2-gamma)	♂	N.S.	0.270076362432844	N.S.	5132.79073846788	16147.8651938948	6208.54110250779
Smp_012070	XLOC_022852	rrp15-like protein	♂	N.S.	0.269070911688769	0.428846826448477	2208.70281469382	2699.58794974549	2268.11680783239
Smp_031310	XLOC_025084	ribosomal small subunit	♂	N.S.	0.263598313992097	N.S.	13509.3374172889	30154.4705241406	15582.486542711
Smp_120350	XLOC_033266	U3 small nucleolar RNA-associated protein 7	♂	N.S.	0.249020733162646	0.473777882474264	1648.46061780441	2307.09136275776	1476.35172922374	100*
Smp_009690	XLOC_031916	60S acidic ribosomal protein P0	♂	N.S.	0.247907955149515	N.S.	23883.8665477763	59020.6908315808	25906.1638140408	100*
N.A.	XLOC_023352	Nucleolin like protein	♂	N.S.	0.241217089362803	N.S.	4603.3419537424	8745.51186480996	4839.89415982444	100*
Smp_011570	XLOC_022896	ribosomal protein S4	♂	N.S.	0.238610363789153	N.S.	24272.8387296778	54607.4695866711	22718.1490824159	100*
Smp_134420	XLOC_022282	mRNA turnover protein 4	♂	N.S.	0.231050692974533	N.S.	2661.90905071163	6085.08138994041	2776.58334975627	100*
Smp_174950	XLOC_025414	ribosomal protein s19a	♂	N.S.	0.220546214681829	N.S.	15529.9762868135	49648.2131323333	15629.8628182247
Smp_171570	XLOC_011003	Ribosomal protein L19	♂	N.S.	0.213364208417861	N.S.	17707.6744736031	38334.5941357822	19386.9297597857	100*
Smp_180000	XLOC_025930	Ribosomal protein S9	♂	N.S.	0.201771990050102	N.S.	30471.4005508738	68883.1241631035	29460.3019716851	100*
N.A.	XLOC_025461	Putative ribosomal protein L32	♂	N.S.	0.201433790496244	N.S.	10785.0045240249	37105.2902757068	12112.5122563487	100*
Smp_022560.2	XLOC_009433	ribosomal protein l21	♂	N.S.	0.189208729187054	N.S.	5659.0710853601	18815.2069015809	5773.80931637925
Smp_096450.2	XLOC_025391	Eftud2 (elongation factor Tu GTP binding domain containing 2) / U5 small nuclear ribonucleoprotein component	♂	N.S.	0.178156794270462	N.S.	5740.37674966876	12174.6886703743	6617.4781276077	100*
Smp_028340	XLOC_027724	Ribosome production factor 2 homolog	♂	N.S.	0.147840211430738	N.S.	2220.22604003829	4845.42578264107	2184.3491968669	100*
N.A.	XLOC_000998	rrna-processing protein utp23 homolog	♂	0.312355802346729	N.S.	N.S.	676.281829020489	723.764390331874	1006.1200421955
Smp_188700	XLOC_005739	eukaryotic translation initiation factor 3 subunit (eif-3)	♂	0.310531019931266	N.S.	N.S.	307.703359153137	474.009482756503	552.000186366877
Smp_050730	XLOC_016397	elongator complex protein 2 isoform x1	♂	0.304619623502599	N.S.	N.S.	2002.10239195843	1842.8363826703	2070.33968962777
Smp_010670	XLOC_021377	60s ribosomal protein l6	♂	0.254290887894762	N.S.	0.355550949128985	1510.04281141261	598.215646638835	2188.06194496556
Smp_165840	XLOC_023211	translation elongation factor g	♂	0.220522847564684	0.408543120677783	N.S.	2971.62290247869	3859.55499930665	3717.50243560813
Smp_072980	XLOC_004303	eukaryotic elongation factor 2 kinase (eef-2 kinase)	♂	0.17811075101246	N.S.	N.S.	6649.05611206793	10085.0221151145	10556.7642362596
Smp_018710	XLOC_012654	ddb1- and cul4-associated factor 7-like	♂	0.173715600335992	N.S.	N.S.	1921.77487112782	2648.51557248129	2384.07883516499
Smp_137590	XLOC_024942	ribosomal RNA methyltransferase	♂	0.167913141245576	0.250085750547124	0.34402543652637	4031.34169403775	3097.02286933164	3789.87921067002	100*
Smp_210750	XLOC_003963	peptidyl-prolyl cis-trans isomerase nima-interacting 4	♂	0.16025952261606	N.S.	N.S.	757.805399633884	640.396079253609	705.673714209906
Smp_194360	XLOC_002908	eukaryotictranslation initiation factor	♂	0.109292560293898	N.S.	N.S.	393.123258266428	767.934040725229	702.208844145893
Smp_161330	XLOC_005562	pih1 domain-containing protein 2	♂	0.0985118612838054	N.S.	N.S.	207.363903186657	100.232133220487	302.329423069199
Smp_074390	XLOC_019997	eukaryotic translation initiation factor 4e-binding protein 2	♂	0.095701959747189	N.S.	N.S.	677.409853790904	1366.16605589223	982.540573792285
POST TRANSLATIONAL MODIFICATIONS, FOLDING & SORTING: CHAPERONES AND ENZYMES				#N/A	#N/A	#N/A	#N/A	#N/A	#N/A
N.A.	XLOC_024792	alpha fucosyltransferase	♀	3.94818588186314	N.S.	N.S.	168.613242560631	20.174543858551	50.8001819754658
Smp_024650	XLOC_015196	beta-1 4-galactosyltransferase 4	♀	N.S.	N.S.	4.35882332307239	11.0286611087381	7.40986420920422	24.9569052834865
Smp_141160	XLOC_003851	ring finger protein 168	♀	N.S.	N.S.	3.14218972667833	130.415905418669	896.602123693474	394.219560301208
Smp_176120	XLOC_033502	ring finger protein 11 (sid 1669) (nedd4 ww domain-binding protein 2)	♂	N.S.	N.S.	0.337856998874161	1073.28603286138	575.594501260022	1363.43149456577
N.A.	XLOC_001262	nedd8-conjugating enzyme ubc12	♂	N.S.	N.S.	0.211914104406891	143.399432770072	37.4454824103102	67.6966507236624
Smp_166680	XLOC_021627	sorting and assembly machinery protein	♂	N.S.	0.467096652786982	N.S.	2156.93270200662	2670.7755466228	2263.84026306901
Smp_017360	XLOC_010694	t-complex protein 1 subunit alpha-like	♂	N.S.	0.442800165637266	N.S.	8887.39627757455	20451.8247268113	13908.9765486562
Smp_029900	XLOC_013416	peptidyl-prolyl cis-trans isomerase-like 1 ppil1	♂	N.S.	0.427753650847802	N.S.	2937.75325685383	4963.5945950973	2860.11876590354
Smp_007450.2	XLOC_025091	heat shock protein 67b2	♂	N.S.	0.427217942439163	0.380434197121573	2544.68829838396	1300.75174330954	2550.70545701334
Smp_073540	XLOC_003628	prefoldin subunit 5	♂	N.S.	0.42159316047403	N.S.	2880.42546225726	6893.23770055125	3355.20542974857
Smp_171890	XLOC_022665	histidine protein methyltransferase 1 homolog	♂	N.S.	0.421548864085946	0.505940540982663	2483.00155806308	1919.59148529289	1793.5208227045
Smp_060010	XLOC_004427	ubx domain containing protein	♂	N.S.	0.396237312198161	N.S.	2666.16009242001	4826.47595780222	3926.1976363126
Smp_020770	XLOC_029118	oligosaccharyltransferase	♂	N.S.	0.375648420324254	N.S.	4253.207393404	9899.65446970139	5413.48365764007
N.A.	XLOC_020562	alpha-glucosyltransferase alg10-b	♂	N.S.	0.366086149268628	N.S.	308.212498150015	630.067006274022	286.538795649002
Smp_146900	XLOC_026545	t-complex protein 1 subunit theta-like	♂	N.S.	0.354526576607345	N.S.	11753.3395861323	32860.3380729307	14182.6912429171
Smp_020920	XLOC_022371	dnaj homolog subfamily b member 4	♂	N.S.	0.353235832578001	0.385074016992512	7760.30828014721	7693.72451008285	10731.8769310612
Smp_179710	XLOC_012789	serine hydroxymethyltransferase	♂	N.S.	0.349331959991285	3.23680004514991	208.623588351882	1817.69910743347	281.24423668986
Smp_097380	XLOC_021330	heat shock 10kd protein 1	♂	N.S.	0.334765671513665	N.S.	6276.48292542275	18597.6556256362	11121.8741758467
Smp_063420	XLOC_013276	chaperonin containing subunit 5	♂	N.S.	0.321410752797869	N.S.	11640.3243957086	41173.6734254022	17854.357098735
Smp_054340.2	XLOC_026756	chaperonin containing subunit 2	♂	N.S.	0.31848157829093	N.S.	10456.6644621748	30229.7446662641	13756.9762156129
Smp_004600	XLOC_017340	t-complex protein 1 subunit delta	♂	N.S.	0.301234216402463	N.S.	8471.00775699258	28760.7701702968	12549.3718347241
Smp_004990	XLOC_001543	t-complex protein 1 subunit zeta	♂	N.S.	0.294217403848155	N.S.	7467.41398389839	36128.109389431	13612.7051569893
Smp_072330	XLOC_002487	heat shock protein	♂	N.S.	0.285025069665259	N.S.	99969.9413184482	303096.911609455	192481.646574725
N.A.	XLOC_034460	protein farnesyltransferase geranylgeranyltransferase type-1 subunit alpha	♂	N.S.	0.277094901359981	0.43160893412179	1183.48283306952	918.347217751693	1095.17882774572
Smp_209050	XLOC_025528	peptidyl-prolyl cis-trans isomerase-like 4	♂	N.S.	0.273291361532604	0.5199679854206	2055.14762426901	3044.40020262825	2110.67399030323
Smp_094810	XLOC_023297	peptidyl-prolyl cis-trans isomerase (PPIase) E	♂	N.S.	0.230540907249113	N.S.	4417.18387834934	7972.94988418225	4215.756550429	100*
Smp_008545	XLOC_017736	Heat shock protein 60 (chaperonin GRoEL)	♂	N.S.	0.229518221300127	N.S.	23617.3552881915	85490.1264893709	43608.1567009193	100*
Smp_022330	XLOC_022130	dnaJ homolog subfamily B	♂	N.S.	0.20814772462916	N.S.	9372.47367446402	14562.9596431063	10099.979067139	100*
Smp_159490	XLOC_025218	Putative polypeptide N-acetylgalactosaminyltransferase	♂	N.S.	0.182257265236401	0.443847348390955	574.637630299806	656.014724801011	332.2814892397	100*
N.A.	XLOC_026731	heat shock protein 70	♀	Inf	N.S.	N.S.	28.1444933790506	0.945514076578416	1.01033555666817
N.A.	XLOC_015656	beta-1 4-galactosyltransferase 4	♀	Inf	N.S.	N.S.	6.0867500114771	0.347783820815472	1.01033555666817
N.A.	XLOC_019182	o-linked n-acetylglucosamine partial	♀	42.3009897970954	N.S.	N.S.	8.94769182313388	1.26562424575043	0.953004129464703
Smp_006560	XLOC_001149	heat shock protein 67b2	♀	11.2714131730567	0.453482797789648	N.S.	15495.890862069	2783.98901134437	2064.85862412183
Smp_120800	XLOC_033201	cysteine string protein	♀	7.77742018147405	N.S.	N.S.	116.358376186011	39.6723714563719	38.4091160987674
Smp_052730	XLOC_019371	heat shock protein 70	♀	7.64738966010835	N.S.	N.S.	831.004982825745	107.177430867376	248.847325113952
Smp_157080	XLOC_023735	ceramide glucosyltransferase	♀	4.9672725008013	N.S.	N.S.	736.22296021403	142.614798443484	199.46769088521
Smp_046930	XLOC_008502	o-linked n-acetylglucosamine ogt	♀	3.85772593643931	N.S.	N.S.	112255.126761311	32422.2946022508	41549.3918379531
Smp_158600	XLOC_030283	dolichyl-diphosphooligosaccharide--protein glycosyltransferase subunit stt3b	♂	0.354234451566841	0.387952875046857	N.S.	4520.12429655388	9078.49162926722	6625.39022617826
Smp_039180	XLOC_031709	nuclear protein localization protein 4 homolog	♂	0.352812768974112	0.462617331507964	N.S.	4174.81851325157	5488.44030304261	5822.21222579128
Smp_208010	XLOC_010465	geranylgeranyl transferase type-2 subunit alpha	♂	0.349313962745561	N.S.	N.S.	1475.04305689405	4255.64712769472	2079.15317646002
Smp_170510	XLOC_032751	cullin-associated nedd8-dissociated protein 1-like	♂	0.325704889008355	N.S.	N.S.	3804.25153521763	4729.40614210174	6153.40635270125
Smp_021370	XLOC_023130	beta-n-acetylgalactosaminyltransferase bre-4	♂	0.315077873477826	N.S.	N.S.	1738.85138674271	1195.05641056203	2250.26047885007
Smp_159100	XLOC_023180	DNAj-like protein	♂	0.311418539310917	0.466995505952013	0.471652767193467	4027.42072598484	3619.08532817077	5107.22082797838
Smp_031000.2	XLOC_022143	cullin	♂	0.311055652745216	0.461720061758221	0.521361550981965	3177.84482257051	3194.25386056126	4684.37709400295
Smp_142250	XLOC_006625	suppressor of cytokine signaling 7	♂	0.302318221757028	N.S.	N.S.	1315.97539377227	2975.38125887568	2855.7957436149
Smp_033350	XLOC_021036	peptide-n -(n-acetyl-beta-glucosaminyl)asparagine amidase	♂	0.299693465748815	N.S.	N.S.	2133.70112057911	2832.79949914961	3019.29129081927
Smp_105680	XLOC_014503	dolichyl-diphosphooligosaccharide--protein glycosyltransferase subunit 1-like	♂	0.293662214961609	0.44172801182585	N.S.	9973.85613918475	18695.3122675834	15272.3498324277
Smp_069130.2	XLOC_034063	heat shock protein 4	♂	0.29015726350318	0.301920871629931	N.S.	22097.6408681181	37603.3528718959	39329.8518082437
Smp_000850	XLOC_003162	cysteine string protein	♂	0.280576754472506	0.439729903437787	N.S.	2395.45306999001	1874.8584665216	3099.93517386195
Smp_124950	XLOC_030059	set and mynd domain containing	♂	0.279678773332047	N.S.	0.464241196496089	412.251847242753	265.319747177037	413.632821712427
Smp_072740	XLOC_028705	glutathione gamma-glutamylcysteinyltransferase	♂	0.278456194101828	N.S.	N.S.	1288.82616591799	2615.82527887185	2239.64334698856
Smp_175330.2	XLOC_030792	sorting nexin 14	♂	0.276835557048813	N.S.	0.454485304795115	281.559949934129	153.904937602701	400.473908133215
Smp_161030	XLOC_001064	Glycosyltransferase 1 domain-containing protein	♂	0.267389642901073	0.338291567647397	0.104675556972059	17685.7204916699	2516.68605566648	11920.3455466088
N.A.	XLOC_032218	selenophosphate synthetase 1	♂	0.267120819498024	N.S.	N.S.	6272.43938645201	8243.62504489554	7825.77988034942
Smp_058140.2	XLOC_018012	protein-l-isoaspartate o-methyltransferase	♂	0.263477687367173	N.S.	N.S.	2853.50510095102	3177.71458251195	3964.95848410047
Smp_005070	XLOC_004710	chaperone protein dnaj	♂	0.262065018864168	N.S.	N.S.	2021.36077020326	894.544490658461	2289.40661844833
Smp_011120	XLOC_008872	methionine aminopeptidase 2	♂	0.25819048380061	N.S.	N.S.	5213.75854079893	9662.25161582769	8049.26817317934
Smp_149900	XLOC_014881	chaperonin containing subunit 7	♂	0.253541089794383	0.368511122261229	N.S.	8272.09883282195	31200.5453457592	13543.4267288456
Smp_103930.5	XLOC_029801	alpha-mannosyltransferase alg9	♂	0.237246791705719	0.289254551881698	0.447604397074975	5046.43284864975	7358.0074216629	5978.13715474365
Smp_039300	XLOC_008939	trim56 protein	♂	0.234736650491988	N.S.	N.S.	3489.69172975802	2406.25486548764	5113.0945187624
Smp_141080	XLOC_000701	dnaj homolog subfamily b member 11-like	♂	0.233241414000706	N.S.	N.S.	1424.29651416024	2159.95562794945	2660.66023488328
Smp_145910	XLOC_012944	protein-tyrosine sulfotransferase	♂	0.202979205877608	N.S.	N.S.	116.055060090933	48.9753307073706	130.667120873837
Smp_134230	XLOC_022100	geranylgeranyl pyrophosphate synthase	♂	0.200722568392591	N.S.	0.426476914193006	2082.38667504874	1475.7455453777	2242.18816040889
Smp_006930	XLOC_014633	beta-galactosyltransferase	♂	0.194442941287091	N.S.	0.443564314239221	2716.3263027063	2534.24274008307	3836.34485891527
Smp_049550	XLOC_002434	heat shock protein 70	♂	0.188976684575254	0.311225871231895	N.S.	17869.0158752211	47616.2329386132	44145.724705678
Smp_056760	XLOC_029243	protein disulfide-isomerase	♂	0.185692131420506	0.345567408172676	N.S.	19885.2879180826	37711.5609307725	28784.3793155319
Smp_064860	XLOC_026587	stress-induced-phosphoprotein 1	♂	0.174638899504426	N.S.	N.S.	11196.0756927392	20586.4574294184	22653.7252124815
Smp_104730	XLOC_025176	dnaj homolog subfamily b member 13-like	♂	0.173546525272517	0.338200336999731	0.497407834630017	2075.93710208307	1646.22557672708	2693.50400711246
Smp_091730	XLOC_019082	sorting nexin-12-like	♂	0.165963866919803	N.S.	N.S.	8704.12949064131	5407.55193817778	10981.6779084389
Smp_089240	XLOC_004408	alpha-mannosyl-glycoprotein	♂	0.165191422686991	N.S.	N.S.	2200.38830568627	1627.36874360874	3446.0976221461
Smp_079770	XLOC_013325	protein disulfide isomerase-associated 3 precursor	♂	0.158812474814445	0.418865986222672	N.S.	24696.3021128394	37212.7525529379	37126.6676590774
Smp_047240.2	XLOC_023348	beta-n-acetylgalactosaminyltransferase bre-4-like	♂	0.145712712813277	N.S.	N.S.	213.270655971788	207.286795899858	373.541387143546
Smp_125170	XLOC_001884	dnaj homolog subfamily c member 27	♂	0.129263353343391	N.S.	N.S.	26.051663198334	30.5511137886083	55.8612479344478
Smp_047100.2	XLOC_026041	protein-l-isoaspartate o-methyltransferase	♂	0.116898400870389	0.378831698923139	0.407757814715003	1238.90950899519	566.221887311117	1682.11878047627
Smp_131810	XLOC_014345	gdp-fucose protein o-fucosyltransferase 2	♂	0.110244625399615	N.S.	N.S.	1301.29262116415	1131.01303695442	1935.6536455007
Smp_047700	XLOC_009596	ring finger protein 11 (sid 1669) (nedd4 ww domain-binding protein 2)	♂	0.10985686246331	N.S.	N.S.	610.647227889824	254.23607206042	1145.45217643434
Smp_150060	XLOC_014836	tripartite motif-containing protein 3 isoform 5	♂	0.106428064609368	N.S.	N.S.	512.34492037807	1468.42975471403	1041.52451897397
Smp_088950	XLOC_005873	hypoxia up-regulated protein 1-like	♂	0.100213634125519	N.S.	N.S.	3592.65681692891	4343.70131753575	7230.03060119244
N.A.	XLOC_023314	protein-l-isoaspartate o-methyltransferase domain-containing protein 2	♂	0.0831446960209104	0.293198325713408	N.S.	395.495668999216	195.428772675625	717.677973406558
N.A.	XLOC_029018	o-linked n-acetylglucosamine partial	♂	0.0715844053253278	N.S.	N.S.	88.163358220377	51.7226159248247	112.448636756178
N.A.	XLOC_023317	protein-l-isoaspartate o-methyltransferase	♂	0.0563193869566857	N.S.	0.465195223168744	142.652447170913	62.5038703063108	194.737896175939
Smp_175960	XLOC_007322	speckle-type poz	♂	0.0308855790145425	N.S.	N.S.	4592.00611911732	2713.93879208233	6008.22472986888
Smp_042720	XLOC_026768	beta-13-n-acetylglucosaminyltransferaseputati ve	♂	0.0291479774137932	N.S.	0.270684118811513	122.508559179071	89.9434822355579	108.075340967448
Smp_205270	XLOC_033496	ring finger protein 11 (sid 1669) (nedd4 ww domain-binding protein 2)	♂	0.00140505441423131	N.S.	N.S.	1390.32647948534	561.43585317318	1352.33030311192
POST TRANSLATIONAL MODIFICATIONS, FOLDING & SORTING: ENDOPLASMIC RETICULUM COMPONENTS				#N/A	#N/A	#N/A	#N/A	#N/A	#N/A
Smp_007730	XLOC_022251	er lumen protein retaining receptor	♂	0.247973190927911	0.283022976793684	N.S.	4489.64485085354	3690.71235279421	4691.64815807585
N.A.	XLOC_026743	er lumen protein retaining receptor	♂	N.S.	0.437253879338724	N.S.	928.443978070026	2456.95840893681	1059.04499103186
Smp_130370	XLOC_012499	elongation of very long chain fatty acids protein 7	♂	N.S.	0.43171153434724	N.S.	59.5019366704003	293.555649657415	76.0084827108172
Smp_180180	XLOC_029753	nucleotide exchange factor sil1	♂	N.S.	0.425824338573508	0.443971318302967	2087.68642734579	1467.5643859453	1925.88242114049
Smp_009830	XLOC_006377	translocon-associated protein subunit beta precursor	♂	N.S.	0.405536201242245	N.S.	2756.5957235866	5792.1814690182	3306.84114541159
Smp_018210	XLOC_026358	fit family protein cg10671	♂	N.S.	0.405087422827103	N.S.	2575.99544295103	3784.65434282158	3064.0629990979
Smp_089000.2	XLOC_016111	signal sequence delta	♂	N.S.	0.404365746675726	N.S.	6068.56323535216	9229.94063871806	9299.55148002236
Smp_059350.2	XLOC_029774	Der1 domain family	♂	N.S.	0.240040842512425	0.494091606518681	4969.15090859586	6378.23935998723	4323.16732220579	100*
Smp_139950	XLOC_025435	homocysteine-responsive endoplasmic reticulum-resident ubiquitin-like domain member 2 protein	♂	N.S.	0.233512767224802	0.497900877578719	1735.75487869682	1056.12625180883	1781.93479983768
Smp_095910	XLOC_009045	signal recognition particle receptor alpha subunit (sr-alpha)	♂	0.270627982545905	N.S.	N.S.	6475.03332955986	8058.46335040546	9331.2557076409
Smp_018240.3	XLOC_031847	transitional endoplasmic reticulum atpase	♂	0.221312694109487	0.34368091873004	N.S.	20225.5086547066	36484.9095178715	30980.9813239525
Smp_154160	XLOC_034451	er lumen protein retaining receptor 2 (kdel receptor 2)	♂	0.206495709946131	N.S.	N.S.	2256.58572014434	3406.81689240942	2847.9438781113
Smp_051810	XLOC_014894	elongation of very long chain fatty acids protein 4	♂	0.0515398242672849	N.S.	N.S.	1716.12564868249	1350.62708653727	2099.12935855094
Smp_030370	XLOC_029301	calreticulin	♂	0.0423780291425921	N.S.	N.S.	39744.3841391788	50225.9794896533	66251.2603816604
Smp_010770	XLOC_021393	elongation of very long chain fatty acids protein 7	♂	0.0231849762315261	N.S.	N.S.	6688.7034295946	7248.8062576099	12099.763052018
POST TRANSLATIONAL MODIFICATIONS, FOLDING & SORTING: GOLGI COMPONENTS				#N/A	#N/A	#N/A	#N/A	#N/A	#N/A
N.A.	XLOC_010505	cog4 transport	♀	Inf	N.S.	N.S.	31.238427786432	0.736950276830467	0.526223836927262
N.A.	XLOC_002882	cog4 transport	♀	Inf	N.S.	N.S.	24.573633785989	1.68246435340888	0
N.A.	XLOC_010031	cog4 transport	♀	Inf	N.S.	N.S.	15.0702079489938	0.319822677334568	1.1926492495964
N.A.	XLOC_003575	cog4 transport	♀	Inf	N.S.	N.S.	14.2655302199473	2.27190358899072	0
N.A.	XLOC_011280	cog4 transport	♀	Inf	N.S.	N.S.	11.3580616154581	2.60728711238754	6.30424141534743
N.A.	XLOC_012424	cog4 transport	♀	Inf	N.S.	N.S.	9.64183780085941	0	0.209585318764443
N.A.	XLOC_002644	cog4 transport	♀	Inf	N.S.	N.S.	8.32795285078396	0	0.257826204022503
N.A.	XLOC_007527	cog4 transport	♀	Inf	N.S.	N.S.	8.07478662857448	5.79863801695018	4.68983857301542
N.A.	XLOC_028095	cog4 transport	♀	Inf	N.S.	N.S.	7.60574734473397	7.96999109519951	0.791659695958319
N.A.	XLOC_003256	cog4 transport	♀	Inf	N.S.	N.S.	7.54980760386631	1.26533675391298	1.09616747908028
N.A.	XLOC_004696	cog4 transport	♀	Inf	N.S.	N.S.	7.04347515944735	0.159911338667284	0
N.A.	XLOC_006848	cog4 transport	♀	Inf	N.S.	N.S.	7.04347515944735	0.159911338667284	0.209585318764443
Smp_163400	XLOC_003722	golgi-associated plant pathogenesis-related protein 1	♀	366.268044921116	N.S.	N.S.	112.452413610788	2.03078063793102	0.419170637528887
N.A.	XLOC_030497	cog4 transport	♀	135.840033736607	N.S.	N.S.	28.2765464872707	0	0
N.A.	XLOC_016046	cog4 transport	♀	68.9837829327642	N.S.	N.S.	14.4614089708747	0	0.209585318764443
N.A.	XLOC_024852	cog4 transport	♀	51.5608406479654	N.S.	N.S.	21.7222842381488	1.63381189232822	5.73286526813836
N.A.	XLOC_012198	cog4 transport	♀	44.7513084315658	N.S.	N.S.	9.45402426755284	0	0.468892409723797
N.A.	XLOC_011916	cog4 transport	♀	43.2836769213856	N.S.	N.S.	13.5590515489573	0	0.257826204022503
N.A.	XLOC_011327	cog4 transport	♀	42.842413484107	N.S.	N.S.	9.0595713048692	0	1.56505988880407
N.A.	XLOC_007588	cog4 transport	♀	38.2266087003565	N.S.	N.S.	12.0106469569616	2.05606996336163	1.51224954163292
N.A.	XLOC_033188	cog4 transport	♀	31.0161278205951	N.S.	N.S.	52.6847660936005	4.06718047799285	4.0003321777562
N.A.	XLOC_014796	cog4 transport	♀	30.7261762335078	N.S.	N.S.	13.1117579064165	4.02638353913033	6.81723244896395
N.A.	XLOC_011335	cog4 transport	♀	29.9782406531373	N.S.	N.S.	12.8026519433394	0	0.259307090959354
N.A.	XLOC_005262	cog4 transport	♀	29.0635282051664	N.S.	N.S.	24.6223863059838	0.20856379974795	3.88122666253872
N.A.	XLOC_009704	cog4 transport	♀	23.5556948924338	N.S.	N.S.	10.1483495610596	0.63053437894391	1.00272590165961
N.A.	XLOC_027464	cog4 transport	♀	23.3259630375205	N.S.	N.S.	14.8965492359323	0.790445717611193	1.03426658996371
N.A.	XLOC_029025	cog4 transport	♀	22.7175220308946	N.S.	N.S.	9.80195043740406	0	1.896917716984
Smp_124070	XLOC_000338	golgi-associated plant pathogenesis-related protein 1	♀	22.6208692664909	N.S.	3.17235949905475	2277.74187618523	105.761707589118	327.829300931529
N.A.	XLOC_011894	cog4 transport	♀	20.7176935098817	N.S.	6.28980913713038	153.269901052847	102.273776518789	49.0182346284734
N.A.	XLOC_030276	cog4 transport	♀	19.7058395737199	N.S.	N.S.	23.4544142035887	1.1054254152457	2.71398933317472
N.A.	XLOC_006103	cog4 transport	♀	18.3804472148279	N.S.	N.S.	9.93879038645333	0.417127599495899	0.936303932510744
N.A.	XLOC_021123	cog4 transport	♀	16.4685966658913	N.S.	N.S.	19.7874469324711	3.33594636903689	6.19989797225834
N.A.	XLOC_009785	cog4 transport	♀	13.919226872805	N.S.	N.S.	16.78708547594	1.68246435340888	2.1486151529348
N.A.	XLOC_009791	cog4 transport	♀	10.9285607029398	N.S.	N.S.	24.5590986106204	0.159911338667284	3.21480124986958
N.A.	XLOC_028643	cog4 transport	♀	9.82964280512493	N.S.	N.S.	42.2736363229538	9.80539395274895	16.6057280181155
N.A.	XLOC_019038	cog4 transport	♀	7.18715207320913	N.S.	N.S.	17.6711099805115	10.5304561836884	5.44615975024025
N.A.	XLOC_007533	cog4 transport	♀	6.17733950998933	N.S.	N.S.	34.5554762120406	8.4300975078698	15.7382721715168
N.A.	XLOC_008725	cog4 transport	♀	6.07604372814235	N.S.	N.S.	69.106941734255	10.1372762030344	20.3933078829092
N.A.	XLOC_019708	cog4 transport	♀	5.54523762496044	N.S.	N.S.	47.692866880277	6.87610228871498	13.6215281436723
N.A.	XLOC_004792	cog4 transport	♀	5.50666609872123	9.68180446262181	N.S.	78.4833813347347	52.2510185602695	44.4969185930351
N.A.	XLOC_030422	cog4 transport	♀	4.71187505843665	N.S.	N.S.	50.0118372346871	11.1458759271951	20.8465237447272
N.A.	XLOC_019646	cog4 transport	♀	4.26348234510803	N.S.	N.S.	45.2838308991087	10.2143690386723	17.1422880262597
N.A.	XLOC_024600	cog4 transport	♀	4.24048965339988	N.S.	N.S.	140.862623249804	38.1672522448428	101.63715608501
N.A.	XLOC_004384	cog4 transport	♀	4.15319647643484	N.S.	N.S.	61.0929824024715	15.257153378406	23.3329986928111
N.A.	XLOC_018997	cog4 transport	♀	4.08530160387291	N.S.	4.5383381708661	50.0941870190284	6.63851363121793	25.8175398664595
N.A.	XLOC_030335	cog4 transport	♀	3.97936341713739	N.S.	N.S.	310.218904198318	137.880830443782	226.493923675037
N.A.	XLOC_031738	cog4 transport	♀	3.57030630907859	N.S.	N.S.	66.535486777941	91.3642128383434	62.7428277828728
N.A.	XLOC_021054	cog4 transport	♀	N.S.	9.14223654021354	N.S.	69.7753260318839	65.9290363793189	112.296694892543
N.A.	XLOC_008393	cog4 transport	♀	N.S.	7.69128409836138	N.S.	40.2599419806649	48.559583046573	59.521108505616
N.A.	XLOC_018678	cog4 transport	♀	N.S.	N.S.	3.54260718374127	14.1481496772523	6.4433713231886	31.696483460847
Smp_176230	XLOC_032312	cog4 transport	♂	0.325754311803413	N.S.	N.S.	3792.33939329857	3946.48382061687	5109.71492608354
Smp_157980	XLOC_011184	cog4 transport	♂	0.322195410123193	N.S.	0.384051170246302	388.573893154205	264.916609503665	509.392965947205
Smp_168930	XLOC_005289	golgin subfamily a member 5	♂	0.311843296382618	N.S.	N.S.	2430.17153933541	1322.0585012252	3112.85971166531
N.A.	XLOC_011927	cog4 transport	♂	0.208018448743884	N.S.	N.S.	54.4142268705573	24.2337208082002	81.704577358698
Smp_017350	XLOC_009131	cog4 transport	♂	0.151117728177976	N.S.	N.S.	1303.77995489938	600.764485172344	2079.53592801177
Smp_138910	XLOC_019216	cog4 transport	♂	0.129431511183845	N.S.	N.S.	1501.50453100632	995.447839531057	3381.63943319766
N.A.	XLOC_014135	cog4 transport	♂	0.0885878882934699	N.S.	N.S.	51.2824451746932	52.6577084779721	52.5085617391529
N.A.	XLOC_000543	cog4 transport	♂	0.0292383294021831	N.S.	N.S.	68.6694478560011	20.1405588431791	130.525937959982
N.A.	XLOC_033612	cog4 transport	♂	0.0245515300665042	N.S.	N.S.	9.78665921468827	6.72612188131704	16.1833119671668
N.A.	XLOC_000348	cog4 transport	♂	0.0175446432428151	N.S.	N.S.	157.187143456395	27.4272110671065	208.332989308539
N.A.	XLOC_019020	cog4 transport	♂	0.00426711815410845	N.S.	N.S.	169.971211501969	206.041919968239	343.725213065926
N.A.	XLOC_018998	cog4 transport	♂	0.00724403343908983	N.S.	N.S.	1152.77180543809	4304.97903430416	1584.97698353289
N.A.	XLOC_030722	cog4 transport	♂	0	N.S.	N.S.	6.58982418275987	0	12.3922479488307
N.A.	XLOC_019486	cog4 transport	♂	0	N.S.	N.S.	6.89601040060777	1.00812049308437	7.12558209400604
N.A.	XLOC_028040	cog4 transport	♂	0	N.S.	N.S.	8.92467543220142	0.315267189471955	9.51522807488847
N.A.	XLOC_033497	cog4 transport	♂	0	N.S.	N.S.	15.4451362362321	2.35734067744006	20.2451010735927
Smp_164500	XLOC_031170	golgi resident protein gcp60 (acyl- -binding domain-containing protein 3)	♂	N.S.	0.460500456061106	N.S.	1808.38235037137	1902.80478441192	2156.87753512179
Smp_141220	XLOC_000651	component of oligomeric golgi complex	♂	N.S.	0.394300290391103	N.S.	1669.57671681987	2219.22491532191	2071.67694461121
N.A.	XLOC_008827	cog4 transport	♂	N.S.	N.S.	0	6.15664819614751	0	7.23098080812489
POST TRANSLATIONAL MODIFICATIONS, FOLDING & SORTING: PROTEASOME				#N/A	#N/A	#N/A	#N/A	#N/A	#N/A
Smp_052870	XLOC_012577	proteasome ( macropain) 26s non- 6	♂	N.S.	0.47282774332357	N.S.	4521.17154530012	7100.31288455447	5052.58223011923
Smp_070930	XLOC_032459	proteasome (prosome macropain) subunit alpha type 4	♂	N.S.	0.464868285746209	N.S.	4102.01603725414	7461.96451708391	4489.45938540839
Smp_056500	XLOC_029294	proteasome (prosome macropain) subunit beta type 4	♂	N.S.	0.445038655148387	N.S.	4246.12567706764	7933.19027050756	4441.6691788909
Smp_131000	XLOC_015958	26s proteasome regulatory subunit n11	♂	N.S.	0.437559394290704	N.S.	5283.7208172879	7922.80845521038	5881.51898076881
Smp_121430.2	XLOC_006590	proteasome subunit beta 3 (t01 family)	♂	N.S.	0.42862093770618	N.S.	4871.35469950698	8174.03333884773	4625.94755980904
Smp_066340.2	XLOC_012605	proteasome inhibitor	♂	N.S.	0.413480196759998	N.S.	1331.43798509197	2792.87014612409	1914.15279221393
Smp_000030	XLOC_006519	26s proteasome regulatory particle	♂	N.S.	0.410224996684579	N.S.	16573.3146730937	17951.8059258779	17982.6230948432
Smp_073410	XLOC_024480	proteasome ( macropain) beta 7	♂	N.S.	0.399611678173534	N.S.	7479.13156430883	12457.5240459565	9108.54354195903
Smp_170730	XLOC_016102	proteasome subunit alpha 1 (t01 family)	♂	N.S.	0.397765729537008	N.S.	5796.2254363639	11887.5310751078	6278.29631654245
Smp_006350.2	XLOC_025378	proteasome-associated protein ECM29 homolog	♂	N.S.	0.396413261154791	N.S.	5888.23627041587	5191.32959030069	5976.21110451828
Smp_025800	XLOC_004510	proteasome ( macropain) beta 1	♂	N.S.	0.391687561472459	N.S.	4084.50086367016	7900.60821619018	4582.80594860095
N.A.	XLOC_014773	20s proteasome subunit alpha 7	♂	N.S.	0.389479328631953	N.S.	5044.49063644285	8883.87117922315	5455.03630888921
Smp_076230	XLOC_030194	proteasome subunit alpha 7 (t01 family)	♂	N.S.	0.389194157965733	N.S.	7117.4922602741	16989.6366984758	8695.37354635074
Smp_074500.2	XLOC_026930	20s proteasome subunit beta 4	♂	N.S.	0.386703602966788	N.S.	3851.71078525342	8996.35894473903	4078.26148689231
Smp_072340	XLOC_002481	26s proteasome regulatory subunit t3	♂	N.S.	0.386133074560656	N.S.	3660.6915464227	6977.45171672857	4681.60104340947
Smp_067890	XLOC_031088	20s proteasome subunit alpha 8	♂	N.S.	0.372812124438391	N.S.	2848.09230638557	6842.66613419415	3457.41046146856
Smp_173840	XLOC_033257	proteasome 26s subunit subunit 4 atpase	♂	N.S.	0.3709487860603	N.S.	6351.92064629884	12835.3016757946	7928.24944034668
Smp_207080	XLOC_008033	proteasome ( macropain) alpha type 6	♂	N.S.	0.357703298916406	N.S.	4617.32058101257	8679.19485632229	4092.85611833629
Smp_012470	XLOC_004110	26s protease regulatory subunit 7	♂	N.S.	0.333241741079784	N.S.	7459.70899421559	14005.3006564644	10498.9024561523
Smp_175250	XLOC_007371	26s proteasome non-atpase regulatory subunit 1	♂	N.S.	0.288959738204381	N.S.	7179.733297207	12146.6677068478	8810.0429370588
Smp_042270.2	XLOC_031971	26s protease regulatory subunit 6a	♂	N.S.	0.288766344019434	N.S.	4976.1332629019	10596.9227992824	6869.88818445285
Smp_034490	XLOC_004064	proteasome catalytic subunit 1 (t01 family)	♂	N.S.	0.287386092629863	N.S.	4429.49139692518	11151.9991972599	5001.33490842456
Smp_164840	XLOC_022009	proteasome subunit beta type-5	♂	N.S.	0.217962482496894	0.504500449273107	9553.2542527544	17271.9524372934	10204.4234955063	100*
N.A.	XLOC_011556	acetyl- c-acetyltransferase	♀	13.5945064486973	N.S.	N.S.	112.376686224261	9.50165508566633	34.6706283510458
N.A.	XLOC_031823	acetyl- carboxylase	♀	7.42278375500195	N.S.	N.S.	935.382887660233	134.445834500399	332.747173543769
N.A.	XLOC_033412	acetyl- carboxylase	♀	4.08983564673766	N.S.	N.S.	76.5096835165636	38.157024322219	36.9329267408302
Smp_080040	XLOC_025844	Proteasomal ubiquitin receptor ADRM1	♂	0.274870853528232	0.256913133074843	N.S.	3551.47392809935	5627.7132119078	3969.87029361095	100*
Smp_019630	XLOC_031904	acetyl- carboxylase	♂	0.164648204779858	0.318179689843865	0.486839144302187	6245.41478108481	6958.10040379798	6483.54736903122
Smp_126670	XLOC_001955	proteasome assembly chaperone 2	♂	0.151941464440762	0.373743902581389	N.S.	3545.62015192686	8198.76814100066	5807.69341048716

## Sheet: Sheet9 - Cellcycle&Apoptosis
CELL CYCLE AND APOPTOSIS (96 hits)
Gene ID (v5.2)	CuffLinks IDs	Predictive product	Sex of bias	Fold Change			Expression level average (rpkm)			Specific remarks
				Cercariae	Schistosomula S#2	Adults	Cercariae	Schistosomula S#2	Adults
CELL CYCLE				#N/A	#N/A	#N/A
Smp_047550	XLOC_009615	morn repeat-containing protein 3-like	♀	N.S.	2.37596933680111	N.S.	453.329569281869	295.69361439013	743.625830185199
Smp_009600	XLOC_001539	Serine/threonine kinasePOLO LIKE KINASE HOMOLOG	♀	N.S.	N.S.	2.58375659393913	300.980978552943	2788.07286845336	552.335775560909
Smp_157820	XLOC_026369	ataxia telangiectasia mutated	♀	N.S.	N.S.	3.80286160511312	95.7361883458388	442.920354910553	168.86448602915
Smp_065150	XLOC_010207	establishment of cohesion 1 homolog	♀	N.S.	N.S.	3.63284463239887	279.121472304154	2590.01332988817	776.080823465604
Smp_056350	XLOC_023065	mitotic spindle assembly checkpoint protein mad2a	♀	N.S.	N.S.	3.61071954684198	89.6034069336982	536.311121380914	164.554744584932
Smp_176260.2	XLOC_032297	geminin-like protein	♀	N.S.	N.S.	3.45970997992827	322.518656208642	3416.65114298192	646.963333674886
N.A.	XLOC_014496	mitotic and dna damage checkpoint protein hus1	♀	N.S.	N.S.	3.3918799782444	91.9054944361765	480.240556599349	130.557502120792
Smp_075110	XLOC_011460	cell cycle checkpoint protein rad1	♀	N.S.	N.S.	2.88083657287088	159.727341832656	616.595259119363	233.853842372597
Smp_153520	XLOC_026206	ect2 protein (epithelial cell-transforming sequence 2 oncogene)	♀	N.S.	N.S.	2.86032506581169	243.924665196124	1739.99791226164	494.402175818991
Smp_047610	XLOC_007836	cell division control protein 45 homolog isoform x1	♀	N.S.	N.S.	2.82338354929852	125.634604936689	480.70505931141	288.705016185429
Smp_137090	XLOC_016450	brca1 associated ring domain	♀	N.S.	N.S.	2.41954664141295	116.922014737604	556.207273035439	210.490712801608
Smp_042810	XLOC_016677	chromosome transmission fidelity protein 18 homolog	♀	N.S.	N.S.	2.22774003429785	150.949293369857	534.455969052807	290.617536920935
Smp_173450	XLOC_014121	chromosome-associated kinesin kif4-like	♀	N.S.	N.S.	2.18840057477422	114.571952387631	453.21584230355	159.166210261909
Smp_195070	XLOC_026936	M-phase-specific PLK1-interacting protein (pfam15502)	♀	13573.1034536151	N.S.	N.S.	343389.075149781	81.8226820229609	292.009341382889	100*
N.A.	XLOC_030613	mps one binder kinase activator-like 1 (mob1 homolog 1)	♀	4.99870974388427	N.S.	N.S.	262.760970556306	38.3438958222463	70.5090269228168
Smp_124130	XLOC_000319	cyclin-dependent kinase-like 1	♀	3.75870919758187	N.S.	N.S.	655.029455773883	119.874951687067	392.619250182924
N.A.	XLOC_030612	mob as tumor suppressor	♀	3.55658766769283	N.S.	N.S.	273.116320341199	100.388308709093	98.7174365724331
Smp_032480	XLOC_027173	stromal antigen	♀	3.28783706026298	N.S.	N.S.	4727.09389752571	3565.91857556458	3170.93552076798
Smp_201100	XLOC_002224	mature t-cell proliferation 1 neighbor	♀	2.74723003684945	N.S.	N.S.	3167.53594851374	1048.02954144872	1404.94425415113
Smp_152180	XLOC_003336	protein yippee-like 1	♂	0.363645954280161	N.S.	N.S.	3565.80061055646	1219.27916162389	5247.38810756176
N.A.	XLOC_033264	tumor susceptibility gene 101 protein	♂	0.340817664027331	0.34309570450422	N.S.	253.844019349053	241.380274133408	313.562803493319
Smp_125370	XLOC_004960	mitogen activated protein kinase kinase kinase isoform cra_a	♂	0.327812499054386	N.S.	N.S.	580.158507484261	439.655080198075	1108.1095345997
Smp_042060	XLOC_015720	mit domain-containing protein partial	♂	0.312671391865008	N.S.	N.S.	4080.46081557919	1919.00704739799	3917.95202614754
Smp_073490	XLOC_000461	dual specificity mitogen-activated protein kinase kinase 6	♂	0.306853625788793	0.368238283986676	N.S.	1381.84736800717	1782.03284417165	1515.00195924586
Smp_172050	XLOC_005572	cyclin fold protein	♂	0.297507616219893	N.S.	N.S.	816.679392024623	1043.31841055344	1558.38558802633
Smp_177190	XLOC_011396	protein regulator of cytokinesis 1	♂	0.282102606069562	N.S.	0.527106973406123	1062.36547607765	491.68846363377	1486.20152337465
Smp_145030	XLOC_017181	deleted in lung and esophageal cancer protein 1	♂	0.277190547425732	N.S.	N.S.	155.870961299489	39.2053276559164	218.682128339412
Smp_058730	XLOC_025304	PrB	♂	0.260984519999728	N.S.	N.S.	1860.28379075962	2564.59268808851	2843.89334772021
Smp_153660	XLOC_028072	cyclin d2	♂	0.24871623568354	N.S.	N.S.	297.150435994583	1750.35437486482	460.87842444836
Smp_076030	XLOC_027314	transducer of erbb2	♂	0.232572286506519	N.S.	N.S.	1150.78507160492	856.099446372649	2094.45945741891
N.A.	XLOC_020789	prohibitin- partial	♂	0.226210174304203	0.316199041873748	N.S.	556.652997950402	1385.57050896797	825.126569593715
Smp_104980	XLOC_004871	g2 m phase-specific e3 ubiquitin-protein ligase isoform 1	♂	0.218875967872549	N.S.	N.S.	867.905402253961	2636.14613946456	1696.32433400884
Smp_176640	XLOC_006934	cell growth regulator with ring finger	♂	0.213681676187912	N.S.	N.S.	1311.60899180854	1287.57282398968	1798.49634090663
Smp_068680	XLOC_033428	secreted frizzled-related protein	♂	0.197119986607628	N.S.	N.S.	150.643754384735	353.57317796153	550.421886016854
N.A.	XLOC_022928	spindle assembly checkpoint component mad1 (mitotic arrest deficient protein 1)	♂	0.1760726108161	N.S.	N.S.	83.0036071308915	65.4613688844586	214.249458191081
Smp_067900	XLOC_031130	cdc37 cell division cycle 37 homolog	♂	0.157545773660543	N.S.	N.S.	4804.17060619395	5496.29504862554	8344.79745217655
Smp_079240	XLOC_000471	dutp pyrophosphatase	♂	0.150098121902721	N.S.	N.S.	930.583939747306	4552.41743295367	1802.01252853546
Smp_172610	XLOC_014789	protein aurora partial	♂	0.148506737997058	N.S.	N.S.	72.0933395501551	405.668700853681	132.367663870874
Smp_152490	XLOC_015774	cyclin-b1-interacting protein 1	♂	0.131929626084271	N.S.	N.S.	55.6750758949843	23.6088930976138	70.585748374103
Smp_078270	XLOC_023223	mps one binder kinase activator-like 2	♂	0.1132495315801	0.300474662281284	N.S.	1486.28903045142	2490.20881271384	1960.16951388351
Smp_047400	XLOC_007858	cell division cycle-associated protein 3	♂	0.104185089725411	N.S.	N.S.	463.763982717096	512.312916494429	681.972159893191
Smp_145550	XLOC_025574	sister chromatid cohesion protein dcc1	♂	0.0598447599301235	0.232564937240627	N.S.	604.771348773395	1046.15759428793	856.98540433129	100*
Smp_138550	XLOC_033939	deleted in malignant brain tumors 1 partial	♂	0.0431360589212526	N.S.	N.S.	88.2253725139595	39.469469378723	172.33398173265
Smp_169930	XLOC_019159	horma domain-containing protein 2	♂	0.0126813380088993	N.S.	N.S.	137.050824421751	16.7816977413657	168.9380278386
Smp_139380	XLOC_021286	spindle assembly checkpoint component mad1 (mitotic arrest deficient protein 1)	♂	0	N.S.	0.036754953698228	90.1275837133809	0	76.3501242063001
Smp_010940	XLOC_021429	acidic leucine-rich nuclear phosphoprotein 32-related protein (anp32 acidic nuclear phospho protein)	♂	N.S.	0.457087277676405	N.S.	26143.6836862836	54955.8160635147	36882.3204497948
Smp_055800	XLOC_024109	pescadillo homolog	♂	N.S.	0.456297978035438	N.S.	3661.23414696124	8057.24303053569	4574.26592132948
Smp_105710	XLOC_014555	mps one binder kinase activator-like 3 (mob1 homolog 3)	♂	N.S.	0.453648235600922	N.S.	1915.60025497088	3465.65222024911	2548.49015927849
Smp_046500.2	XLOC_020230	proliferating cell nuclear antigen	♂	N.S.	0.445058577327231	N.S.	2716.13741157384	12974.3656889763	4024.98819109197
Smp_082810.2	XLOC_009999	cdc42 homolog	♂	N.S.	0.442991629794438	N.S.	8788.69779073831	11927.1602009212	10819.1634389353
Smp_005180	XLOC_004716	g1 to s phase transition protein	♂	N.S.	0.439339606448246	N.S.	5424.35389796103	11373.0757386288	6809.24535562441
Smp_045060	XLOC_022514	mitotic checkpoint protein bub3	♂	N.S.	0.439038548760835	N.S.	2278.63309997571	4096.08173826394	2330.08914969644
Smp_134020	XLOC_009322	cell division cycle protein 27 homolog	♂	N.S.	0.437362572494467	N.S.	2770.74636090024	4098.07611710204	3353.64175507563
Smp_052910	XLOC_012583	s-phase kinase-associated protein 1	♂	N.S.	0.430848606113891	N.S.	16570.1458820104	8315.29860328467	10487.4290062254	qPCR
Smp_064360	XLOC_018616	polymerase delta-interacting protein 3	♂	N.S.	0.423861766821158	N.S.	3120.02069208839	6449.91827664238	3841.51963176034
Smp_075210.2	XLOC_027141	prohibitin	♂	N.S.	0.403480874800235	N.S.	3949.48503005953	8337.06464140921	5473.92842498703
Smp_082490	XLOC_012625	cyclin b	♂	N.S.	0.402143161923169	2.77078772967478	605.49298611048	8359.0216284714	1209.15628274894
Smp_080730	XLOC_020253	cyclin dependent kinase 1	♂	N.S.	0.385490154574545	2.72360435106963	494.226600439791	4953.27236304219	1121.03544465499
Smp_103950	XLOC_005901	cyclin-dependent kinase 10	♂	N.S.	0.384370822076484	N.S.	5675.71024552306	9876.40919527178	5500.73171008372
Smp_036590	XLOC_022427	regulator of differentiation 1	♂	N.S.	0.36531626717221	N.S.	8081.53467918487	13127.3311431925	9630.4805884498
Smp_057650	XLOC_031375	ist1 homolog	♂	N.S.	0.354144138969504	N.S.	13888.0073349116	13054.0386088215	14996.0730926363
Smp_159110	XLOC_025865	spindle assembly abnormal protein 6 homolog	♂	N.S.	0.328071618219312	0.453464047632553	1436.77505476078	1211.8047412728	1502.92017130498
Smp_004060	XLOC_003426	cell division cycle 20	♂	N.S.	0.325241666536955	2.68575273199354	186.676316815509	3412.82373849299	396.791701945657
Smp_150690	XLOC_028513	proliferation-associated protein 2g4	♂	N.S.	0.323200429922066	N.S.	4583.85007989373	13033.2400299543	5941.01447228463
Smp_106130.2	XLOC_011632	stress-70 mitochondrial	♂	N.S.	0.309240833911161	N.S.	10794.684630936	22870.4580367707	16645.0737615298
Smp_056360.5	XLOC_025760	p30 dbc protein	♂	N.S.	0.295152702223508	N.S.	37621.9533554664	85491.0963821853	44852.5539962351
Smp_028430	XLOC_027687	anaphase-promoting complex subunit 11	♂	N.S.	0.287723822394069	0.437408333061446	1098.36825126194	775.125198294474	851.266156793597
N.A.	XLOC_022672	protein yippee-like 5-like	♂	N.S.	0.274771125316198	0.250032663805533	2327.87636532745	2331.60852887205	2318.72980353187
Smp_193440	XLOC_023250	cell division cycle and apoptosis regulator protein 1	♂	N.S.	0.272947565924263	N.S.	7626.30554419964	18479.3158130457	9576.14835524634
Smp_056360	XLOC_008673	p30 dbc protein	♂	N.S.	0.106506754337618	N.S.	16.8561071853596	66.16330396312	11.3291656021307
Smp_047900	XLOC_010560	mitogen-activated protein kinase	♂	N.S.	N.S.	0.525008987951813	5578.00520572703	2003.02020289171	3947.74261112499
APOPTOSIS & REGULATION				#N/A	#N/A	#N/A
Smp_040390	XLOC_005961	glioma-associated oncogene homolog 1 (zinc finger protein) gene 2	♀	34.2662982634606	N.S.	N.S.	7.28740774940285	0.319822677334568	0.773478612067509
Smp_124090	XLOC_003485	b-cell lymphoma leukemia	♀	9.95817861252962	N.S.	N.S.	49.6512414635699	22.7772234635907	24.2277745471268
Smp_033400	XLOC_021447	cytochrome c proximal	♀	7.13909614819258	N.S.	N.S.	44605.478073876	10225.1901335708	8173.64873302965
Smp_072110	XLOC_031435	programmed cell death protein 4	Switch	5.51546399152081	0.377974937135522	N.S.	44761.7416769442	24491.2734781277	16203.8146193525
Smp_114565	XLOC_031019	abd-a-like protein	♀	5.18861501704389	N.S.	2.25766832446934	312.868859401169	171.794394307583	161.716631963789
Smp_036980	XLOC_007034	programmed cell death protein 2-like	♀	3.19103352263406	N.S.	N.S.	635.608437190632	494.686646303653	326.27045186257
Smp_041630	XLOC_021580	bcl2-like apoptosis -containing protein	♀	3.102448116872	N.S.	N.S.	2524.21584791699	1356.90248046442	1615.2647864015
Smp_071890	XLOC_008666	traf-interacting protein	♀	N.S.	N.S.	3.93473878800327	46.2253046408281	248.441946266303	82.9702112586702
N.A.	XLOC_033892	caspase apoptosis-related cysteine peptidase	♀	N.S.	N.S.	3.2806071240698	38.9915701101568	272.352471429023	91.8694149111966
Smp_176000	XLOC_007315	abnormal spindle-like microcephaly-associated protein	♀	N.S.	N.S.	2.57079083051815	176.886356217675	743.178576782961	313.198018918689
Smp_165560	XLOC_025538	pcdc2 rp-8 (programmed cell death protein 2)	♂	0.18264445350858	0.368683021348479	0.474595093913518	2092.82438287462	2107.11247130318	2647.86496950923
Smp_072180	XLOC_002518	apoptosis regulator bax-like	♂	0.359885672500755	N.S.	N.S.	1821.06209503128	3146.84929639763	2775.35278784224
Smp_131280	XLOC_019752	bcl-2 homologous antagonist killer	♂	0.302089945905233	N.S.	N.S.	2189.31896000369	2219.74649632642	3412.77072887428
Smp_032000	XLOC_029539	caspase-7 (c14 family)	♂	0.268361539255967	0.438170356720367	N.S.	381.111185402039	1054.16577572994	705.432012156324
N.A.	XLOC_027697	caspase apoptosis-related cysteine peptidase	♂	0.18192990296454	0.270807117805627	0.453392884128649	3673.65630524263	3320.41853585842	4156.11398697249
Smp_005900	XLOC_004969	bcl2-associated athanogene 3	♂	0.140839335373275	N.S.	N.S.	5880.11231162808	4212.75293903176	9349.73007658698
Smp_113740	XLOC_018833	lyr motif containing protein 1-like	♂	0.12223350000222	0.467575150961272	N.S.	1570.24370019341	1714.83995820382	2262.94218540088
Smp_120260	XLOC_031412	phosphatidylserine receptor	♂	0.0577589026764694	N.S.	N.S.	13.9089636224066	9.73972297423972	12.5563173139049
Smp_079480	XLOC_019345	lin-24 like family member	♂	0.0220169529832167	N.S.	0.382236099161011	2905.47408675352	1165.20379273289	2927.32812199767
Smp_123550	XLOC_012369	glioma pathogenesis-related protein 1 precursor	♂	0.000964978055173181	N.S.	N.S.	787.822647467593	44.114404477411	1036.44092041678
Smp_123540	XLOC_012370	glioma pathogenesis-related protein 1 precursor	♂	0.000393421518961712	N.S.	N.S.	643.751831159541	27.783213442397	700.580713430458
Smp_197180	XLOC_007122	apoptosis inhibitor	♂	N.S.	0.448269326801366	N.S.	3724.43125644381	7292.2430145319	4450.98112479182
Smp_087620	XLOC_013312	programmed cell death 6-interacting protein	♂	N.S.	0.313857944395756	N.S.	7955.25478337027	5800.18990263926	7767.02447172295
Smp_207000	XLOC_025331	CIAPIN1	♂	N.S.	0.169037465547419	N.S.	1686.80996449527	4805.15213064843	1911.12051705972	100*
Smp_125590	XLOC_025323	xk-related protein	♂	N.S.	N.S.	0.508556814246493	1481.97742751096	719.080924094236	1388.54646564244

## Sheet: Sheet10 - SignallingPathways
GENERAL SIGNALLING PATHWAYS (698 hits)
Gene ID (v5.2)	CuffLinks IDs	Predictive product	Sex of bias	Fold Change			Expression level average (rpkm)			Specific remarks
				Cercariae	Schistosomula S#2	Adults	Cercariae	Schistosomula S#2	Adults
SERINE THREONINE KINASES/PHOSPHATASES				#N/A	#N/A	#N/A
Smp_198260	XLOC_018852	serine threonine kinase	♀	Inf	N.S.	N.S.	16.6931988621464	0	1.04335713190912
Smp_155950	XLOC_024287	serine threonine-protein kinase d1	♀	18.3874637086248	N.S.	N.S.	693.423938674419	27.833133282792	69.8676662336947
Smp_155960	XLOC_024288	serine threonine-protein kinase d1-like	♀	7.55276959638617	N.S.	N.S.	35.2177127052383	3.70650762916543	8.66819183645141
Smp_090890	XLOC_005397	Sérine/Thréonine protein kinase	♀	7.41959031678695	2.19411824555185	N.S.	4327.13095568754	2311.83083505823	1741.78057531362
Smp_134260	XLOC_007666	serine threonine protein kinase	♀	4.93146732719921	N.S.	N.S.	424.574162127965	49.940759879118	185.428595441658
Smp_127060	XLOC_020774	serine threonine protein kinase	♀	4.87097460976349	N.S.	N.S.	144.243418885282	23.141047127503	91.1641932299105
Smp_172410	XLOC_004471	serine threonine protein kinase	♀	3.84506319314906	N.S.	N.S.	647.594008084539	71.0436913843713	206.688262637846
N.A.	XLOC_034252	serine threonine protein kinase	♀	3.60240935557073	N.S.	N.S.	172.22759142554	27.8410728658433	71.8002361462992
Smp_151410	XLOC_005164	serine threonine-protein phosphatase with ef-hands 2	♀	3.48547210660459	N.S.	2.35004189891293	209.973721998995	274.643977501283	165.512912575769
N.A.	XLOC_018347	serine threonine protein kinase	♀	3.18853583946306	N.S.	N.S.	78.0350759896805	21.8083034973523	54.4835628261048
Smp_088920	XLOC_005871	serine threonine protein kinase	♀	3.15255298201979	N.S.	N.S.	388.552887306424	200.779129622047	188.499865348113
Smp_009800	XLOC_006565	serine threonine-protein kinase nek10-like isoform x3	♀	N.S.	N.S.	2.30948240421137	189.908660480872	79.3542796528733	225.871339575327
Smp_144210	XLOC_002982	death-associated protein kinase 1	♀	N.S.	N.S.	2.28730186803767	719.333302289681	429.692338865964	873.625600722826
Smp_157240	XLOC_018785	serine threonine kinase	♀	N.S.	N.S.	1.97946929490828	616.71752453001	297.257883181893	995.350084114639
Smp_166010	XLOC_031666	serine threonine-protein phosphatase 2a 65 kda regulatory subunit a alpha isoform-like	♂	0.300757423184516	N.S.	N.S.	4589.34006587015	4462.37671169293	6459.41884669964
Smp_073930	XLOC_031311	serine threonine-protein kinase	♂	0.2258007550206	N.S.	N.S.	3097.23479826429	4073.3187798107	5109.33437387539
Smp_150860	XLOC_015339	serine threonine protein kinase	♂	0.217231499764739	N.S.	N.S.	1789.41835944927	1808.81597591663	3107.07383476963
Smp_094190	XLOC_026842	serine threonine-protein kinase nim1-like	♂	0.196191992761918	N.S.	N.S.	1264.00223183522	1094.82641400808	2068.81528838895
Smp_135360	XLOC_026686	serine threonine kinase	♂	0.194329734085327	N.S.	N.S.	185.764301762276	1149.30583167682	273.327789124096
Smp_018290	XLOC_012708	serine threonine-protein kinase 17b	♂	0.152615233463384	N.S.	0.498033811954715	988.124269446638	1202.96076981803	1217.05409473999
Smp_133490	XLOC_029112	serine threonine kinase	♂	0.0948957696192685	N.S.	0.495660941509506	274.640419510597	39.1672307029749	540.840932304609
Smp_177010	XLOC_013729	serine threonine tyrosine-interacting-like protein 1	♂	0.0797116937283145	N.S.	N.S.	94.3950682648987	61.7791267260917	180.056179250592
Smp_198810	XLOC_029111	serine threonine kinase	♂	0	N.S.	N.S.	8.64112677165972	0.159911338667284	8.82627409663889
Smp_166150	XLOC_017045	maternal embryonic leucine zipper kinase-like	Switch	N.S.	0.434767093951585	2.29327745599334	140.95307650206	829.065497636482	228.347053766171
Smp_165490	XLOC_033275	serine threonine-protein phosphatase 2a catalytic subunit alpha isoform	♂	N.S.	0.444706398582285	N.S.	9576.02001513042	17630.3114508687	12078.6025137108
Smp_157370	XLOC_008579	serine threonine protein kinase	♂	N.S.	0.427307739673172	N.S.	1493.42260296329	2394.96556971683	1179.67062388102
N.A.	XLOC_018805	tp53rk-binding protein	♂	N.S.	0.420739789755373	N.S.	222.711190035261	395.629522949766	183.535258793203
Smp_004810.3	XLOC_010420	serine threonine protein phosphatase pp1 catalytic subunit	♂	N.S.	0.411965920756731	N.S.	7733.48918188486	10178.9445405866	8663.86173272476	100*
Smp_141580	XLOC_016177	serine threonine-protein kinase tousled-like 1-like	♂	N.S.	0.411260005326132	N.S.	2115.59660985972	2518.24690326796	2373.78893856921
Smp_077180	XLOC_027592	serine threonine-protein kinase chk1	♂	N.S.	0.408909092191011	N.S.	145.975369963814	913.706377561084	235.530370208357
Smp_191870	XLOC_025121	serine threonine-protein kinase haspin	♂	N.S.	0.408717311589478	N.S.	7737.80547636443	7707.74055722135	7608.53037367876
Smp_030710	XLOC_014159	serine threonine-protein phosphatase 4 catalytic subunit	♂	N.S.	0.367568254899098	N.S.	737.349167070212	1570.09215433725	776.283653808059
Smp_094760	XLOC_025992	serine threonine protein kinase	♂	N.S.	0.35904764786048	N.S.	3976.90607524251	3291.209255471	2797.44727389276
Smp_172280	XLOC_006764	serine threonine-protein phosphatase 2a 65 kda regulatory subunit a alpha isoform	♂	N.S.	0.293503780018944	N.S.	6504.08432720863	11647.1646601928	7891.15721382851
Smp_174390	XLOC_029320	serine threonine kinase receptor associated	♂	N.S.	0.222730872582363	0.400793206221932	1525.91078228956	2076.05540015835	1403.36011939682
Smp_153170	XLOC_031382	serine threonine kinase	♂	N.S.	N.S.	0.394303352543464	4995.24709725556	794.818601749245	5070.53875439783
Smp_137370	XLOC_004750	serine threonine kinase	♂	N.S.	N.S.	0.392821048876344	282.161666233942	101.110665122428	387.295037537969
TYROSINE KINASES				#N/A	#N/A	#N/A	#N/A	#N/A	#N/A
Smp_153500	XLOC_023426	tyrosine kinase	♀	5.10828463057624	N.S.	N.S.	4403.43191103924	2020.92271717027	2029.55933784969
Smp_024290	XLOC_026679	discoidin domain receptor	♀	N.S.	2.93477078105468	N.S.	133.401005365318	109.704002639274	195.973689353102
N.A.	XLOC_019623	non-receptor tyrosine kinase spore lysis a	♀	N.S.	2.53475119942443	N.S.	406.846258865461	244.931289761608	409.775269277995
Smp_133690	XLOC_008963	discoidin domain receptor	♂	0.357088459770186	N.S.	N.S.	2130.88949673349	2371.96956327927	3389.68912787922
Smp_133250	XLOC_000715	discoidin domain receptor	♂	0.311442868276998	N.S.	N.S.	1273.04007503029	1532.22478146515	2189.21683051303
Smp_164810	XLOC_031659	tyrosine-protein kinase fps85d	♂	0.310882958367651	N.S.	N.S.	580.814491000909	613.304564279434	937.392852118658
Smp_136660	XLOC_020658	pro-neuregulin- membrane-bound isoform-like isoform x2	♂	0.299691899455979	N.S.	N.S.	1510.60024878236	996.878175596041	1650.01267920524
Smp_006920	XLOC_014655	tyrosine kinase	♂	0.284687355118656	N.S.	N.S.	1380.08306004647	1727.3986318586	2047.4532506187
Smp_197050	XLOC_000003	tyrosine kinase	♂	0.283759963853491	0.292447115203527	N.S.	74.4607983236946	66.6746484018397	89.356073785874
Smp_156580	XLOC_032178	tyrosine kinase	Switch	0.277074853546431	3.95578561826415	N.S.	78.5014263722285	76.3332585356954	208.326129628374
Smp_157650	XLOC_026409	tyrosine kinase	♂	0.267287321678568	N.S.	N.S.	899.724718096208	1950.73920863575	2169.35855964443
Smp_162900	XLOC_024567	tyrosine-protein kinase pr2	♂	0.256059474189663	N.S.	N.S.	828.484085138909	1237.30035161931	1758.72378302108
Smp_212730	XLOC_023844	tyrosine kinase: SmTK3	♂	0.248802095348255	N.S.	N.S.	2103.75852203736	4279.21002136657	3986.80864157546
Smp_093930.2	XLOC_022787	tyrosine kinase	♂	0.247247069910851	N.S.	0.495491198602035	2769.24202991432	2198.94090811093	4463.59937988161
Smp_136550	XLOC_027840	tyrosine-protein kinase fer isoform 2	♂	0.21208596536025	N.S.	N.S.	2118.32634213631	1024.47508494757	3689.31541959637
Smp_014840	XLOC_009847	yap65-like protein	♂	0.129111435801862	N.S.	N.S.	1030.71524771509	949.569613716857	1921.76636378084
Smp_131020	XLOC_017364	protein arg- isoform a	♂	0.0222953879445665	N.S.	0.443153166663771	1092.65665182152	350.9190485723	1800.00246239503
Smp_130250	XLOC_020875	Dual specificity tyrosine-phosphorylation-regulated kinase 4-like putative protein	♂	0.0102461390733651	N.S.	0.233859061980404	1118.04067625909	303.842664452791	1747.97286453448
Smp_167940	XLOC_025383	wee1-like protein kinase 2	♂	N.S.	0.195180221114877	N.S.	147.622128706081	1103.36710572218	226.201128263104
CALCIUM BINDING PROTEINS				#N/A	#N/A	#N/A	#N/A	#N/A	#N/A
Smp_032980	XLOC_022617	Calcium binding protein putative	♀	Inf	N.S.	N.S.	21847.0871215576	0.716258959230705	42.3229250396662	100*
Smp_032990	XLOC_022618	Calcium binding protein putative	♀	164534.273031263	N.S.	64.874607867077	50378.4329520136	0.639645354669135	837.005893770895	100*
Smp_032970	XLOC_022615	Calcium binding protein putative	♀	5852.76488661087	N.S.	235.834467197676	6586.64502828339	125.913137019962	429.188546958226
Smp_033000	XLOC_022620	Calcium binding protein putative	♀	2837.19925456545	N.S.	N.S.	135952.228649272	111.832507401564	399.007129640077
Smp_039600	XLOC_024418	calbindin-32	♀	52.4994474883335	N.S.	7.05471808119713	191.647522554555	7.24723853251841	18.7143127396912
N.A.	XLOC_024233	c2 calcium lipid-binding c2 calcium-dependent membrane -containing protein	♀	11.6099777895971	N.S.	N.S.	14.1887228345279	0	4.17207444180217
Smp_136150	XLOC_001349	nalp (nacht leucine rich repeat and pyrin domain containing)-related	♀	9.08957659891381	N.S.	N.S.	462.664273618385	41.1542348799766	90.4332699787683
N.A.	XLOC_027114	c2 calcium lipid-binding c2 calcium-dependent membrane -containing protein	♀	7.17466069796531	N.S.	N.S.	57.0629368472569	6.84654496725921	20.4262510389284	100*
Smp_166780	XLOC_012618	calcineurin-binding protein cabin-1-like	♀	6.80654605625364	N.S.	N.S.	7571.54758892619	1923.88395584773	2488.5144904935
Smp_033010	XLOC_022625	16 kda calcium-binding p+E2:E33rotein (egg antigen sme16)	♀	5.83273734570362	N.S.	N.S.	317.513826778349	48.2317706282703	104.199493193447
N.A.	XLOC_000104	ef-hand domain-containing family member c2-like	♀	N.S.	3.13236570733268	N.S.	344.231721211203	202.08587196577	427.426945393334
Smp_158150	XLOC_019313	Calumenin-like protein	♀	N.S.	N.S.	Inf	34.9537647224149	2.42881309780202	419.609317061088
Smp_021790.2	XLOC_009293	ef-hand calcium-binding domain-containing protein 10-like	♀	N.S.	N.S.	2.32847025841628	490.510558361713	699.305402042707	736.789198555378
Smp_137750	XLOC_032029	calbindin-32	♂	0.259875147226361	N.S.	N.S.	335.44573447355	276.971175725082	592.975872559643
Smp_160500	XLOC_000008	nalp ( leucine rich repeat and pyrin domain containing)-related	♂	0.23018759609953	N.S.	N.S.	281.483763631191	311.314380899819	465.677716499361
Smp_209000	XLOC_003271	iq calmodulin-binding motif-containing protein 1	♂	0.215034111682053	N.S.	N.S.	340.689362644123	164.428983210967	507.075256473665
Smp_103740	XLOC_022741	calmodulin related calcium binding protein	♂	0.132899204849285	N.S.	0.445883243869999	1735.78571835301	1328.53144305494	1957.68130154538
Smp_153540	XLOC_026205	ef-hand calcium-binding domain-containing protein 11	♂	0.114359570595773	N.S.	N.S.	267.862296351363	234.299919981219	479.837906013879
Smp_152940	XLOC_021101	otopetrin	♂	0.0687048656948749	N.S.	N.S.	517.005365021132	248.566344975455	980.663750652986
Smp_179570	XLOC_033611	Otopetrin	♂	0.00354699891172449	N.S.	N.S.	618.273159606072	150.957964406615	1090.90128930789	100*
N.A.	XLOC_026058	calcium-binding protein	♂	0.000980887585740006	N.S.	0.338762212944867	2028.76118167384	1572.47333703688	2038.45396129743
Smp_105730	XLOC_014617	cai-2 protein	♂	0.000769369829802484	0.161707403858015	N.S.	610.109898168221	27.8693650002332	903.198074640445
Smp_019640	XLOC_031906	calcyphosin-like protein	♂	N.S.	0.457175157534469	N.S.	5154.79980705657	3143.35904125861	3867.10515522376
Smp_026560.2	XLOC_024515	calmodulin	♂	N.S.	0.453714606755904	N.S.	39278.8053020308	27503.3683799771	48545.2947074989
Smp_093830	XLOC_030023	calcium-regulated heat stable protein 1 (calcium-regulated heat-stable protein of 24 kda)	♂	N.S.	0.443694755589468	N.S.	3638.48431896156	3897.23907742711	3735.43376001103
Smp_146280	XLOC_018081	calbindin-32	♂	N.S.	0.37969261159341	N.S.	918.825410959238	277.190283452381	567.635512241293	100*
Smp_064950	XLOC_023688	calcineurin subunit b type 1	♂	N.S.	0.375357495175823	N.S.	7935.05730487559	6656.65525128531	8582.92700392813	100*
Smp_141950	XLOC_019387	calcineurin a	♂	N.S.	N.S.	0.49479960454783	508.479249234701	325.654043718197	696.456027448003
Smp_027430	XLOC_016430	ef hand domain family member a2	♂	N.S.	N.S.	0.470272376533683	2261.9643759058	546.550800191808	1389.9562174953
Smp_005350	XLOC_030105	20 kda calcium-binding protein (antigen sm20)	♂	N.S.	N.S.	0.4654857527444	38812.5227093564	13828.9301175937	37889.4157454347
Smp_123080	XLOC_018965	sarcoplasmic calcium-binding protein	♂	N.S.	N.S.	0.328480552860495	6100.12943221314	1532.15300244697	5709.90560752936
UBIQUITINYLATION				#N/A	#N/A	#N/A	#N/A	#N/A	#N/A
N.A.	XLOC_018500	ubiquitin-specific peptidase 2 (c19 family)	♀	Inf	N.S.	N.S.	8.32795285078396	0	0
Smp_152780	XLOC_004642	E3 ubiquitin-protein ligase domain containing predictive protein	♀	1885.91495717975	N.S.	N.S.	3668.55883076682	0.987429175484607	5.53482664542351
N.A.	XLOC_004643	ubiquitin protein ligase e3a	♀	289.710420149986	N.S.	N.S.	60.0722353337597	0	0
Smp_212390	XLOC_008702	ubiquitin-specific peptidase 2 (c19 family)	♀	10.8108411947438	N.S.	N.S.	8146.5404716059	573.908496710603	1306.61900297732
Smp_052350	XLOC_013174	ubiquitin thioesterase trabid	♀	4.33406224426581	N.S.	N.S.	8907.22625681228	1600.71708813023	3562.45509877927
Smp_123260	XLOC_020114	ubiquitin 1	♀	3.8027209037768	N.S.	N.S.	1267.8298201474	1194.25893116554	796.77893335679
Smp_153690	XLOC_028064	ubiquitin-specific peptidase 24 (c19 family)	♀	N.S.	2.36720116634832	N.S.	2017.08949465586	853.201146772591	2297.68114835766
Smp_147520	XLOC_026088	e3 ubiquitin-protein ligase trim37 isoform 2	♂	0.334613661614692	N.S.	0.458420596847275	2813.05207599136	1842.35739191375	3482.27140866611
Smp_174670	XLOC_019953	non-canonical ubiquitin conjugating enzyme	♂	0.30783608269273	N.S.	N.S.	1166.98111345309	860.467862430106	1793.91871543875
Smp_082050	XLOC_009235	ubiquitin-conjugating enzyme e2-25kd	♂	0.307131279467366	0.378092277594508	N.S.	1960.08567310706	5139.65641632408	3143.07044866502
Smp_041390	XLOC_021816	ubiquitin-conjugating enzyme e2g 2	♂	0.241134489340735	N.S.	N.S.	3048.51782308693	2867.41620151717	4068.04835874919
Smp_145330	XLOC_016676	iq and ubiquitin-like domain-containing protein	♂	0.226472011774612	N.S.	N.S.	101.833453961639	68.2255215385023	217.586822528791
Smp_002380	XLOC_010959	ubiquitin domain-containing protein ubfd1	♂	0.223525365304027	N.S.	N.S.	3282.49967093828	2581.92091389324	4335.82875920687
Smp_083030	XLOC_005041	ubiquitin-conjugating enzyme e2 z	♂	0.216068864367384	N.S.	N.S.	3870.82548978451	6794.14970654684	5380.76254003007
Smp_212380	XLOC_008719	ubiquitin-specific peptidase 2 (c19 family)	♂	0.206520960485183	N.S.	N.S.	698.080729347541	651.05648561191	1228.39895483599
Smp_001560	XLOC_010090	e3 ubiquitin-protein ligase zswim2	♂	0.197018498046984	N.S.	N.S.	440.22575276657	233.090737222149	805.248044490034
Smp_088990	XLOC_017462	e3 ubiquitin-protein ligase rnf14	♂	0.0720242979312274	N.S.	N.S.	622.710278458382	618.281422027461	1054.54605930193
Smp_166960	XLOC_008284	ubiquitin-protein ligase bre1	♂	0.0527229895469331	N.S.	0.394209220806098	1695.09607028671	661.252280556784	2941.71923347927	100*
Smp_005290	XLOC_030095	ubiquinol-cytochrome c reductase cytochrome c1 subunit	♂	N.S.	0.469961995918745	N.S.	10458.326060943	13205.4380493619	8248.22329993086
N.A.	XLOC_005061	ubiquitin c-terminal hydrolase	♂	N.S.	0.459290920764926	N.S.	1313.61847797385	1940.74100254406	1427.81152796787
Smp_169440	XLOC_028610	ubiquitin-conjugating enzyme e2a	♂	N.S.	0.447960962139861	N.S.	9112.74299258559	6566.15905351303	6525.16805289949
Smp_089180	XLOC_001214	ubiquitin-specific peptidase 7 (c19 family)	♂	N.S.	0.437403529369421	N.S.	15208.1581854994	22225.5836042577	18601.7610160684
Smp_167170	XLOC_001910	ancient ubiquitous protein	♂	N.S.	0.434964823670027	N.S.	4086.48230315145	4546.30492662257	5336.91084242182
Smp_059930	XLOC_025803	ubiquinol-cytochrome c reductase hinge -containing protein	♂	N.S.	0.421546221292359	0.442590635447742	10235.7905918672	6360.90507910274	7383.77230850522
Smp_028100	XLOC_004738	ubiquitin-conjugating enzyme e2 g	♂	N.S.	0.409800749059759	N.S.	10396.4266163711	13835.3615509522	12404.1916642851	100*
Smp_181900	XLOC_022708	e3 ubiquitin-protein ligase listerin	♂	N.S.	0.402395139785978	N.S.	1449.22128089118	1604.20201686047	1699.85491035995
Smp_067980.4	XLOC_031143	ubiquitin-conjugating enzyme e2	♂	N.S.	0.386190870529041	N.S.	1343.43282630122	1856.11300666126	1369.15575710506
Smp_084740	XLOC_006769	ubiquitin carboxyl-terminal hydrolase 14 isoform 1	♂	N.S.	0.385360532571636	N.S.	2923.08888576346	4684.71712174346	3538.99168460838
Smp_068000	XLOC_031124	ubiquitin conjugating enzyme e2	♂	N.S.	0.379935632512159	N.S.	9052.43528665853	10766.5046398686	8468.88716251081
Smp_196510	XLOC_005115	ubiquitin fusion degradaton protein	♂	N.S.	0.377052024745283	N.S.	6170.54441067426	5522.98260943536	6050.28606381803
Smp_162630	XLOC_011471	ubiquitin-activating enzyme e1	♂	N.S.	0.340254782616055	N.S.	13512.814215548	17353.5639114876	18253.1645257622
Smp_196220	XLOC_003076	e3 ubiquitin-protein ligase hakai	♂	N.S.	0.340096498945433	N.S.	926.840142194778	1461.30110141215	942.038927089634
Smp_157360	XLOC_010217	e3 ubiquitin-protein ligase synoviolin-b precursor	♂	N.S.	0.327715675174686	N.S.	7573.98052982868	9339.25526578495	9326.70233439327
Smp_010290	XLOC_032113	ubiquilin 12	♂	N.S.	0.31081982774852	N.S.	6376.07687671497	10207.8804378565	8521.23023402642
Smp_180060	XLOC_022740	ubiquinone biosynthesis protein coq7 homolog	♂	N.S.	0.278012393880438	0.377672765987994	1756.62376011254	1631.30563648209	2019.29762347153
Smp_166600	XLOC_029349	ubiquitin-conjugating enzyme	♂	N.S.	0.277221894366489	N.S.	4834.03726641905	7088.98893754097	4607.87127476345
Smp_061870	XLOC_023388	Ubiquinol cytochrome c reductase	♂	N.S.	0.243315266338161	N.S.	12095.7563240063	14661.3651939478	8800.52001978673
N.A.	XLOC_007217	ubiquitin ligase e3 alpha-related	♂	N.S.	N.S.	0.46839088679833	572.215251323669	478.206800930331	721.964995315152
Smp_007780	XLOC_022236	ubiquitin-conjugating enzyme e2 o	♂	N.S.	N.S.	0.459670406914962	273.916915419183	287.276776110902	409.899837205225
Smp_125740	XLOC_004279	e3 ubiquitin-protein ligase march3	♂	N.S.	N.S.	0.455703215276282	1671.23213226107	476.059077678855	1594.1193920234
Smp_167680	XLOC_013899	e3 ubiquitin-protein ligase huwe1	♂	N.S.	N.S.	0.348799648034425	229.385224108179	227.482468943467	337.086906353495
WD PROTEINS				#N/A	#N/A	#N/A	#N/A	#N/A	#N/A
Smp_139250	XLOC_006811	wd repeat-containing protein 86	Switch	21.89305818532	N.S.	0.0245592728251659	621.018577712778	1.2032628011137	19.8786263916415
Smp_148220	XLOC_009862	wd repeat protein	♀	3.51421571770995	N.S.	N.S.	4571.5727098538	2000.13089138245	2057.95681574784
Smp_151390.2	XLOC_032410	WD40 repeat-containing protein	♀	N.S.	7.11057506711899	5.05668851690962	16.0771320517158	47.0808820331802	26.6184953246875
Smp_153020	XLOC_021504	wd repeat-containing protein 93	♀	N.S.	4.0651559609407	N.S.	191.930274649507	81.2116292815295	204.147098598324
Smp_134200	XLOC_022116	wd repeat-containing protein 16	♂	0.321995254703551	N.S.	N.S.	364.455600875279	220.909561478461	629.81919320085
Smp_174380	XLOC_029322	PREDICTED: F-box and leucine-rich repeat protein 16	♂	0.257089717577053	N.S.	0.48197035097438	453.588959325117	303.967363640791	667.900159540174
Smp_022630	XLOC_007672	wd-repeat protein	♂	0.247295217324918	0.462408000639717	0.377721278871572	4510.48282716518	2568.46732785585	5528.19802784661
N.A.	XLOC_017677	wd repeat domain-containing protein 83	♂	0.194843805837069	N.S.	N.S.	161.903797149865	35.4182222785663	279.725866589368	100*
Smp_141850	XLOC_025283	wd repeat-containing protein 60	♂	0.193754225955993	N.S.	N.S.	51.1951129128853	23.3712607070034	62.7850431382992
Smp_018580	XLOC_012666	wd repeat-containing protein wrap73	♂	0.187313623122641	N.S.	N.S.	419.566476883185	721.600171372804	878.926697789973
Smp_080320	XLOC_000570	wd repeat-containing protein 69	♂	0.183783573205964	N.S.	N.S.	452.084691485757	144.785869764941	667.243456789004	100*
Smp_049520	XLOC_002422	wd repeat-containing protein 61	♂	0.13423924833592	N.S.	N.S.	7841.00184251374	5665.3619811883	11661.3867383502
Smp_044400	XLOC_010466	wd repeat-containing protein 92	♂	N.S.	0.457312023290993	N.S.	499.328108738153	1014.22115090432	678.527402336405
Smp_163780	XLOC_024666	wd repeat-containing protein 26 isoform 2	♂	N.S.	0.430356756636454	N.S.	6176.64837109038	10283.874237992	8704.59164929091
Smp_019680	XLOC_031907	wd repeat-containing protein 13-like	♂	N.S.	0.399572094276141	N.S.	4112.28278655504	3551.69176998518	3572.48922424455
Smp_167150	XLOC_005030	wd-repeat protein	♂	N.S.	0.332781448240604	N.S.	6722.36848375904	16505.0354510456	9004.09036334354
Smp_165460	XLOC_023242	WD40 containing protein	♂	N.S.	0.205844664246615	N.S.	3082.23950963866	7018.2257516357	3215.20411933581
Smp_145610	XLOC_022768	wd and tetratricopeptide repeats protein 1	♂	N.S.	N.S.	0.42636761068017	5386.62723333238	3127.2521977949	5496.50513263855
OTHER SIGNALLING PROTEINS				#N/A	#N/A	#N/A	#N/A	#N/A	#N/A
Smp_203400	XLOC_022243	rhodopsin-like orphan gpcr	♀	Inf	N.S.	N.S.	52.7152523884296	0.507695159482756	1.93754894723351
N.A.	XLOC_007710	protein phosphatase methylesterase 1 (s33 family)	♀	Inf	N.S.	N.S.	31.241302563042	0	0.518614181918708
N.A.	XLOC_032620	protein phosphatase methylesterase 1 (s33 family)	♀	Inf	N.S.	N.S.	26.9453626873204	0	0.468892409723797
N.A.	XLOC_016045	protein phosphatase methylesterase 1 (s33 family)	♀	Inf	N.S.	N.S.	20.3228729726856	0.764911420311371	0
N.A.	XLOC_011920	rab6-interacting protein 2 elks erc	♀	Inf	N.S.	N.S.	19.1796820218231	0	0
N.A.	XLOC_006066	rab6-interacting protein 2 elks erc	♀	Inf	N.S.	N.S.	16.197627096177	0.507695159482756	0.524742949990411	qPCR
N.A.	XLOC_014952	protein phosphatase methylesterase 1 (s33 family)	♀	Inf	N.S.	N.S.	16.1603339355986	0	1.21083033348721
N.A.	XLOC_029683	protein phosphatase methylesterase 1 (s33 family)	♀	Inf	N.S.	N.S.	15.3527814299421	2.26003575527873	1.73557328347762
N.A.	XLOC_002530	protein phosphatase methylesterase 1 (s33 family)	♀	Inf	N.S.	N.S.	14.8650955658124	0	0.209585318764443
N.A.	XLOC_011339	rab6-interacting protein 2 elks erc	♀	Inf	N.S.	N.S.	14.4814032815783	0.159911338667284	3.83298577728066
N.A.	XLOC_011325	rab6-interacting protein 2 elks erc	♀	Inf	N.S.	N.S.	14.3960562819718	0.368475138415233	1.00124501472276
N.A.	XLOC_007578	rab6-interacting protein 2 elks erc	♀	Inf	N.S.	N.S.	14.2841768002365	1.5225530147416	1.37217476699359
N.A.	XLOC_009261	protein phosphatase methylesterase 1 (s33 family)	♀	Inf	N.S.	N.S.	14.0496571583163	0	0
N.A.	XLOC_000140	protein phosphatase methylesterase 1 (s33 family)	♀	Inf	N.S.	N.S.	12.9143521092934	0	0.266916745967908
N.A.	XLOC_000159	protein phosphatase methylesterase 1 (s33 family)	♀	Inf	N.S.	N.S.	12.6238927265055	1.1054254152457	0.886582160315833
N.A.	XLOC_027489	rab6-interacting protein 2 elks erc	♀	Inf	N.S.	N.S.	11.2727146158516	0.994166537659082	0.987506591642505
N.A.	XLOC_014902	protein phosphatase methylesterase 1 (s33 family)	♀	Inf	N.S.	N.S.	11.0195483936421	0	0.266916745967908
N.A.	XLOC_019931	protein phosphatase methylesterase 1 (s33 family)	♀	Inf	N.S.	N.S.	10.926315492196	0.159911338667284	0.209585318764443
N.A.	XLOC_001376	protein phosphatase methylesterase 1 (s33 family)	♀	Inf	N.S.	N.S.	10.8890223316176	0	0
N.A.	XLOC_031733	protein phosphatase methylesterase 1 (s33 family)	♀	Inf	N.S.	N.S.	10.5612697882512	3.05963496858338	5.75104635202917
N.A.	XLOC_000160	rab6-interacting protein 2 elks erc	♀	Inf	N.S.	N.S.	9.58589805999175	0.368475138415233	1.31788353288558
N.A.	XLOC_024348	protein phosphatase methylesterase 1 (s33 family)	♀	Inf	N.S.	N.S.	8.95692545538785	0	0.209585318764443
N.A.	XLOC_009659	rab6-interacting protein 2 elks erc	♀	Inf	N.S.	N.S.	8.91963229480941	1.3765956314996	1.53507850665858
N.A.	XLOC_003082	protein phosphatase methylesterase 1 (s33 family)	♀	Inf	N.S.	N.S.	8.74105239375682	0	0
N.A.	XLOC_032447	protein phosphatase methylesterase 1 (s33 family)	♀	Inf	N.S.	N.S.	8.41329985039046	0.999009517359143	0.476502064732352
N.A.	XLOC_010700	rab6-interacting protein 2 elks erc	♀	Inf	N.S.	N.S.	8.30930627049474	1.27929070933827	2.18163672817575
N.A.	XLOC_017613	protein phosphatase methylesterase 1 (s33 family)	♀	Inf	N.S.	N.S.	8.23471994933786	0	0.257826204022503
N.A.	XLOC_009702	protein phosphatase methylesterase 1 (s33 family)	♀	Inf	N.S.	N.S.	7.94426056654994	0.667606498150039	1.03278570302686
N.A.	XLOC_029726	protein phosphatase methylesterase 1 (s33 family)	♀	Inf	N.S.	N.S.	7.70974092462968	0.159911338667284	0.515652408045006
N.A.	XLOC_016033	protein phosphatase methylesterase 1 (s33 family)	♀	Inf	N.S.	N.S.	7.53116102357709	2.5656595053188	3.13657898246603
N.A.	XLOC_004609	protein phosphatase methylesterase 1 (s33 family)	♀	Inf	N.S.	N.S.	7.04347515944735	0	0.257826204022503
N.A.	XLOC_000372	rab6-interacting protein 2 elks erc	♀	Inf	N.S.	N.S.	7.04347515944735	4.00273291164282	0.937784819447595
N.A.	XLOC_019324	rab6-interacting protein 2 elks erc	♀	Inf	N.S.	N.S.	6.98753541857969	0	1.42950619419705
N.A.	XLOC_005208	protein phosphatase methylesterase 1 (s33 family)	♀	Inf	N.S.	N.S.	6.79030893723787	0.159911338667284	0.209585318764443
N.A.	XLOC_007917	protein phosphatase methylesterase 1 (s33 family)	♀	Inf	N.S.	N.S.	6.73436919637021	0	0.467411522786947
N.A.	XLOC_008808	protein phosphatase methylesterase 1 (s33 family)	♀	Inf	N.S.	N.S.	6.55578929531761	0	0
N.A.	XLOC_018104	rab6-interacting protein 2 elks erc	♀	Inf	N.S.	N.S.	6.53714271502839	0.368475138415233	0.943913587519298
N.A.	XLOC_011761	protein phosphatase methylesterase 1 (s33 family)	♀	Inf	N.S.	N.S.	6.49984955444995	1.42069260471765	0.476502064732352
N.A.	XLOC_019859	rho-related protein raci	♀	Inf	N.S.	N.S.	6.48120297416073	0	0
N.A.	XLOC_032555	rab6-interacting protein 2 elks erc	♀	Inf	N.S.	N.S.	6.30262307310813	0.159911338667284	0.266916745967908
N.A.	XLOC_005468	protein phosphatase methylesterase 1 (s33 family)	♀	Inf	N.S.	N.S.	6.26532991252969	0.577038938163183	0.266916745967908
N.A.	XLOC_031631	protein phosphatase methylesterase 1 (s33 family)	♀	Inf	N.S.	N.S.	6.14268975234476	0.159911338667284	1.4218965391885
N.A.	XLOC_011543	protein phosphatase methylesterase 1 (s33 family)	♀	Inf	N.S.	N.S.	6.12404317205554	0	0
N.A.	XLOC_001888	rab6-interacting protein 2 elks erc	♀	Inf	N.S.	N.S.	6.10539659176632	0	0.209585318764443
N.A.	XLOC_012933	protein phosphatase methylesterase 1 (s33 family)	♀	Inf	N.S.	N.S.	6.0867500114771	0	0.895672702261239
N.A.	XLOC_009059	protein phosphatase methylesterase 1 (s33 family)	♀	Inf	N.S.	N.S.	6.06810343118788	0.528386477082517	0.895672702261239
N.A.	XLOC_007526	protein phosphatase methylesterase 1 (s33 family)	♀	Inf	N.S.	N.S.	5.9081701104245	0	0.800750237903724
N.A.	XLOC_020481	rab6-interacting protein 2 elks erc	♀	Inf	N.S.	N.S.	5.88952353013528	0.159911338667284	0.476502064732352
N.A.	XLOC_001857	protein phosphatase methylesterase 1 (s33 family)	♀	Inf	N.S.	N.S.	5.79629062868918	0.159911338667284	1.47013742444656
N.A.	XLOC_030272	rab6-interacting protein 2 elks erc	♀	Inf	N.S.	N.S.	5.69229704879346	1.74080277388967	0.74341881070026
N.A.	XLOC_016565	protein phosphatase methylesterase 1 (s33 family)	♀	Inf	N.S.	N.S.	5.65500388821502	0	0
N.A.	XLOC_023520	protein phosphatase methylesterase 1 (s33 family)	♀	Inf	N.S.	N.S.	5.50583124590126	0	0.266916745967908
Smp_204060	XLOC_025120	rhodopsin-like orphan gpcr	♀	455.287402539076	N.S.	N.S.	94.2869684926177	0	1.1956110234701
N.A.	XLOC_033818	protein phosphatase methylesterase 1 (s33 family)	♀	327.704271027195	N.S.	N.S.	67.9232629988636	0.978318199759381	0.62875595629333
N.A.	XLOC_008812	protein phosphatase methylesterase 1 (s33 family)	♀	235.105762518495	N.S.	N.S.	48.7887600394585	0.159911338667284	0.419170637528887
N.A.	XLOC_000441	protein phosphatase methylesterase 1 (s33 family)	♀	148.233938852171	N.S.	N.S.	30.8376159681044	1.05677295416503	1.68881328515641
N.A.	XLOC_011253	protein phosphatase methylesterase 1 (s33 family)	♀	147.083428637244	N.S.	N.S.	45.3411049403866	5.92495829734365	3.19810105291562
Smp_170770	XLOC_001210	ras-related protein rab-33b	♀	127.543827953605	N.S.	N.S.	39.3583485088053	0.799556693336419	1.1926492495964
N.A.	XLOC_012569	protein phosphatase methylesterase 1 (s33 family)	♀	126.205802385574	N.S.	N.S.	91.5201323575595	2.86992133659111	1.29970244899477
N.A.	XLOC_012199	protein phosphatase methylesterase 1 (s33 family)	♀	126.128996479894	N.S.	N.S.	26.2698632898841	0	1.21083033348721
N.A.	XLOC_002725	protein phosphatase methylesterase 1 (s33 family)	♀	111.232698067816	N.S.	N.S.	23.1917006861819	0.790445717611193	0
N.A.	XLOC_000730	protein phosphatase methylesterase 1 (s33 family)	♀	100.032745671821	N.S.	N.S.	41.7546978280464	0.848209154417085	0.74341881070026
N.A.	XLOC_034247	protein phosphatase methylesterase 1 (s33 family)	♀	99.8071524688995	N.S.	N.S.	20.8307324633002	3.14725393134459	0.209585318764443
Smp_197900	XLOC_015069	protein phosphatase methylesterase 1 (s33 family)	♀	94.2195343990402	N.S.	N.S.	48.8310193566473	2.15764288154812	1.05857644192623
N.A.	XLOC_021730	rab6-interacting protein 2 elks erc	♀	80.0241288307989	N.S.	N.S.	16.7427797473701	0.368475138415233	0.686087383496795
N.A.	XLOC_011899	protein phosphatase methylesterase 1 (s33 family)	♀	78.5664202891833	N.S.	N.S.	16.4415596861325	2.0648934472494	4.69246991010294
Smp_129190	XLOC_031769	rab6-interacting protein 2 elks erc	♀	73.8672133007493	N.S.	N.S.	76.7876542337721	2.01624098616874	1.82288609282658
N.A.	XLOC_007529	rab6-interacting protein 2 elks erc	♀	72.2581308276959	N.S.	N.S.	22.4306300047386	1.52308547844827	2.34770746203874
N.A.	XLOC_024449	protein phosphatase methylesterase 1 (s33 family)	♀	64.1728289462406	N.S.	N.S.	33.4222981858376	11.4371624773739	8.91308563660839
N.A.	XLOC_019028	rab6-interacting protein 2 elks erc	♀	64.1115555864959	N.S.	N.S.	19.9362609432223	0.799556693336419	4.50968221938683
N.A.	XLOC_028148	protein phosphatase methylesterase 1 (s33 family)	♀	63.3882760154338	N.S.	N.S.	33.0199593213143	1.16803183175165	5.52483925553252
N.A.	XLOC_000135	rab6-interacting protein 2 elks erc	♀	58.3553753208954	N.S.	N.S.	230.798622331559	0	3.88853591810206
N.A.	XLOC_011900	rab6-interacting protein 2 elks erc	♀	54.4241830691535	N.S.	N.S.	11.4528215630998	1.55104662192917	0.476502064732352
Smp_199610	XLOC_033979	protein phosphatase methylesterase 1 (s33 family)	♀	53.2588828782815	N.S.	N.S.	183.155972988192	6.07732303095445	11.8150902302353
Smp_197150	XLOC_006907	high-affinity cgmp-specific 35-cyclic phosphodiesterase	♀	53.0694829175582	N.S.	N.S.	551.221909764365	11.5080183731961	19.4411370442508
N.A.	XLOC_015149	rab6-interacting protein 2 elks erc	♀	52.695762684032	N.S.	N.S.	11.0956617609946	4.20634726643005	1.99332106827837
N.A.	XLOC_006396	maguk p55 subfamily member	♀	50.2454440495615	N.S.	N.S.	10.5893293165757	11.1358820297367	0.943913587519298
Smp_151840	XLOC_016068	rab6-interacting protein 2 elks erc	♀	47.6677310762072	N.S.	35.5826993412292	69.6622262165137	9.09393545325007	28.295935512137
N.A.	XLOC_019857	protein phosphatase methylesterase 1 (s33 family)	♀	45.976467748801	N.S.	N.S.	9.70719048976232	0	0
N.A.	XLOC_030471	protein phosphatase methylesterase 1 (s33 family)	♀	45.7959931864638	N.S.	N.S.	9.66989732918388	2.59327992433192	0.678477728488241
N.A.	XLOC_033523	rab6-interacting protein 2 elks erc	♀	45.4350440617893	N.S.	N.S.	9.59531100802699	1.77976927557022	2.84231219144015
N.A.	XLOC_024217	protein phosphatase methylesterase 1 (s33 family)	♀	43.435911833162	N.S.	N.S.	9.18221146505414	5.95820863114969	1.4670972313511
N.A.	XLOC_011167	protein phosphatase methylesterase 1 (s33 family)	♀	42.8366911583825	N.S.	N.S.	166.422445455235	3.08702112838939	14.7770919758842
N.A.	XLOC_019674	protein phosphatase methylesterase 1 (s33 family)	♀	42.0302779535895	N.S.	N.S.	8.89175208226622	2.10443493260484	0.838341275057774
N.A.	XLOC_013950	protein phosphatase methylesterase 1 (s33 family)	♀	40.9855931986915	N.S.	N.S.	8.67587902063518	2.55005613928831	0.524742949990411
N.A.	XLOC_008703	protein phosphatase methylesterase 1 (s33 family)	♀	40.3092584465802	N.S.	N.S.	136.266231925803	3.50414872788529	4.5384347321599
Smp_157100	XLOC_026591	sphingosine kinase 2	♀	40.0164839567521	N.S.	2.44038449995923	4311.35399949946	142.940571313858	251.618020282457
N.A.	XLOC_009584	protein phosphatase methylesterase 1 (s33 family)	♀	37.9417762151662	N.S.	N.S.	8.04690641603129	3.69875857220795	0.257826204022503
N.A.	XLOC_025001	receptor tyrosine phosphatase type r2a	♀	36.2654304920879	N.S.	N.S.	7.70050729237571	0.683742327887188	0.257826204022503
Smp_212290	XLOC_032440	protein phosphatase methylesterase 1 (s33 family)	♀	34.2419394676811	N.S.	N.S.	712.394150998587	39.6272330766748	63.0320034490249
N.A.	XLOC_008704	rab6-interacting protein 2 elks erc	♀	34.1760609822919	N.S.	N.S.	7.26876116911363	0.159911338667284	0.209585318764443
N.A.	XLOC_016034	protein phosphatase methylesterase 1 (s33 family)	♀	33.1437852317691	N.S.	N.S.	10.4543564631263	4.51711220066972	3.80440686285026
N.A.	XLOC_011372	protein phosphatase methylesterase 1 (s33 family)	♀	32.1600046313399	N.S.	N.S.	30.4594092056662	7.42601075160347	0.943913587519298
Smp_125060	XLOC_028759	kinase suppressor of ras	♀	31.7462200699947	N.S.	N.S.	135.086106445924	2.87903231231634	8.74712335930811
N.A.	XLOC_028287	protein phosphatase methylesterase 1 (s33 family)	♀	31.6577775401971	N.S.	N.S.	16.7477459039804	0.848209154417085	0.209585318764443
N.A.	XLOC_009316	rab6-interacting protein 2 elks erc	♀	29.5646420789819	N.S.	3.4460269892272	128.437270810549	10.6135303712491	40.3049329285902
N.A.	XLOC_023742	rab6-interacting protein 2 elks erc	♀	28.6486128604123	N.S.	N.S.	30.6328622164855	1.15407787632637	2.01306145832778
N.A.	XLOC_018711	protein phosphatase methylesterase 1 (s33 family)	♀	27.736767331202	N.S.	N.S.	61.8084581219619	6.61244687021144	3.60966203543596
N.A.	XLOC_017112	protein phosphatase methylesterase 1 (s33 family)	♀	26.4330421720165	N.S.	N.S.	8.3996194267116	2.31595804224054	4.86454261093509
N.A.	XLOC_006935	rab6-interacting protein 2 elks erc	♀	25.2817966037357	N.S.	N.S.	16.2925663596	3.64849922049032	6.04320141988681
Smp_055810	XLOC_024107	inositol 5-phosphatase	♀	24.8320559993354	N.S.	5.84346683087346	37.1705242966994	22.3139020565014	24.73235425691
N.A.	XLOC_015910	protein phosphatase methylesterase 1 (s33 family)	♀	24.3223793144476	N.S.	N.S.	384.537443761841	0.785602737911133	19.9868960509032
N.A.	XLOC_005755	protein phosphatase methylesterase 1 (s33 family)	♀	23.0773606010401	N.S.	N.S.	44.414620079284	0.625691399243849	0
N.A.	XLOC_010688	rab6-interacting protein 2 elks erc	♀	22.8528779526476	N.S.	N.S.	9.85789017827172	3.67079742872705	10.9397587169139
N.A.	XLOC_003741	rab6-interacting protein 2 elks erc	♀	22.4358124032286	N.S.	N.S.	14.5282887059733	0	0.257826204022503
N.A.	XLOC_030275	protein phosphatase methylesterase 1 (s33 family)	♀	21.1700815383774	N.S.	N.S.	86.5411704770246	12.328021412263	7.81011017134423
N.A.	XLOC_031840	protein phosphatase methylesterase 1 (s33 family)	♀	21.0602576173791	N.S.	N.S.	9.11703809193251	0.417127599495899	0.266916745967908
N.A.	XLOC_024190	rab6-interacting protein 2 elks erc	♀	20.8330309595367	4.74246682527991	N.S.	200.682270712826	41.6963070537226	18.8204830852938
N.A.	XLOC_030431	protein phosphatase methylesterase 1 (s33 family)	♀	20.7048361973905	N.S.	N.S.	24.4222400794128	1.61985793690293	1.45491811442945
N.A.	XLOC_029143	protein phosphatase methylesterase 1 (s33 family)	♀	20.4649388888722	N.S.	N.S.	15.4432739019402	2.78788976865458	3.75134449811468
N.A.	XLOC_011763	rab6-interacting protein 2 elks erc	♀	19.9492452345276	N.S.	N.S.	84.177211712529	18.0349311892145	9.671296556778
N.A.	XLOC_007312	protein phosphatase methylesterase 1 (s33 family)	♀	19.9297394516344	N.S.	N.S.	43.0911614475504	3.12219886512111	3.17231031401626
N.A.	XLOC_003147	protein phosphatase methylesterase 1 (s33 family)	♀	19.741130167876	N.S.	N.S.	33.9744634050221	2.74650713345506	1.76859485871857
N.A.	XLOC_003070	protein phosphatase methylesterase 1 (s33 family)	♀	18.6439344743588	N.S.	N.S.	18.1923362318617	3.94923747086209	2.91892677080431
N.A.	XLOC_002979	protein phosphatase methylesterase 1 (s33 family)	♀	18.2565822065413	N.S.	N.S.	21.8127767101469	10.0840257341229	6.68586939760306
N.A.	XLOC_011575	protein phosphatase methylesterase 1 (s33 family)	♀	17.3166318156396	N.S.	N.S.	67.714246434501	1.43920204800555	2.12895318210714
N.A.	XLOC_004221	protein phosphatase methylesterase 1 (s33 family)	♀	17.2082209093726	N.S.	N.S.	213.502797748351	14.5360514394752	30.0166339165334
Smp_032750	XLOC_009186	guanine nucleotide-binding protein g alpha subunit	♀	16.7976002988421	N.S.	N.S.	61.9834692283376	6.32619503897162	8.56596011653056
N.A.	XLOC_011336	protein phosphatase methylesterase 1 (s33 family)	♀	16.5882474339891	N.S.	N.S.	14.5377016540085	0.695567641630943	2.09741249380304
N.A.	XLOC_015503	protein phosphatase methylesterase 1 (s33 family)	♀	16.2220881145704	N.S.	N.S.	24.9113372247345	8.26010625270428	8.32922997303245
N.A.	XLOC_025675	rab6-interacting protein 2 elks erc	♀	16.1121830340343	N.S.	Inf	10.6081552126462	9.30297848407436	5.92761009555266
N.A.	XLOC_006553	protein phosphatase methylesterase 1 (s33 family)	♀	15.8904835111809	N.S.	N.S.	12.152113013217	0.843653666554472	2.33693081283219
N.A.	XLOC_020880	nuclear inhibitor of protein phosphatase 1-like	♀	15.7879752227078	N.S.	N.S.	72.4701712775903	14.7659987184206	14.3896840068828
N.A.	XLOC_006884	rab6-interacting protein 2 elks erc	♀	15.7641471090263	N.S.	N.S.	50.0401903222993	14.3052426641209	17.1518358060939
N.A.	XLOC_021583	protein phosphatase methylesterase 1 (s33 family)	♀	15.7389626880906	N.S.	N.S.	56.5039461801647	8.10024814666733	6.86810467130954
N.A.	XLOC_007447	rab6-interacting protein 2 elks erc	♀	15.7349798107598	N.S.	N.S.	12.0402335314817	2.96175506274715	4.74794163170259
N.A.	XLOC_024847	protein phosphatase methylesterase 1 (s33 family)	♀	15.6396893510479	N.S.	N.S.	71.9556128819276	10.0402587727105	10.5864576315242
N.A.	XLOC_021620	rab6-interacting protein 2 elks erc	♀	15.5233220326186	N.S.	N.S.	10.2431095087014	1.14734051415189	0.986025704705654
N.A.	XLOC_024525	rab6-interacting protein 2 elks erc	♀	15.4867677614745	N.S.	N.S.	11.8616536304291	0	0.524742949990411
N.A.	XLOC_001267	protein kinase	♀	14.3697100572794	N.S.	N.S.	141.875667140118	8.02028225422327	13.4056404584935
N.A.	XLOC_032551	rab6-interacting protein 2 elks erc	♀	14.2581646384142	N.S.	N.S.	22.0705690395625	4.24783636689023	0.266916745967908
N.A.	XLOC_000165	protein phosphatase methylesterase 1 (s33 family)	♀	14.1771179794015	N.S.	N.S.	12.4302397027404	1.74507076991484	2.91448410999376
N.A.	XLOC_022931	rab6-interacting protein 2 elks erc	♀	13.8606600767443	N.S.	N.S.	9.10025860724313	1.19599297523256	2.51806401826878
N.A.	XLOC_018909	protein phosphatase methylesterase 1 (s33 family)	♀	13.6165723437189	N.S.	N.S.	24.0525868504202	2.84191767314198	7.10325874874989
N.A.	XLOC_011146	rab6-interacting protein 2 elks erc	♀	13.3613753279729	N.S.	N.S.	42.7596607937259	0.319822677334568	3.73954419985999
Smp_153210	XLOC_021969	rhodopsin-like orphan gpcr	♀	13.1973290426072	N.S.	N.S.	102.037693321904	186.387516843528	27.4624913700291
N.A.	XLOC_001223	protein phosphatase methylesterase 1 (s33 family)	♀	13.1652259802856	N.S.	N.S.	21.6859848393221	0.20856379974795	2.07762372187283
N.A.	XLOC_006139	rab6-interacting protein 2 elks erc	♀	13.1045759782209	N.S.	N.S.	13.0623113683548	0.945514076578416	6.50769796604017
N.A.	XLOC_009790	protein phosphatase methylesterase 1 (s33 family)	♀	12.716096036175	N.S.	N.S.	17.0057175491773	0	0.678477728488241
Smp_129270	XLOC_031731	camp-specific 3 -cyclic phosphodiesterase partial	♀	12.4740463560421	N.S.	N.S.	66.3140961823517	12.4553096543261	39.3049967871023
N.A.	XLOC_016763	protein phosphatase methylesterase 1 (s33 family)	♀	12.4056909507897	N.S.	N.S.	12.3139134295802	0.159911338667284	2.54207347078608
N.A.	XLOC_012437	rab6-interacting protein 2 elks erc	♀	12.2483856983289	N.S.	N.S.	27.1764478817259	2.81638337584215	4.82928251142335
N.A.	XLOC_000521	protein phosphatase methylesterase 1 (s33 family)	♀	12.1739332116017	N.S.	N.S.	35.2898939834515	21.3888013052023	12.9236588064607
Smp_050830	XLOC_014998	phosphatidylinositol polyphosphate 5-phosphatase	♀	11.9817348109474	N.S.	N.S.	10253.5878785868	1233.89267768331	1697.67803029142
N.A.	XLOC_034513	protein phosphatase methylesterase 1 (s33 family)	♀	11.8182796885477	N.S.	N.S.	11.8710665784643	0.479734016001852	2.6236363307303
Smp_194770	XLOC_002934	atp:guanidino kinase	Switch	11.674731912944	0.386546650101678	N.S.	210677.091592799	16074.5766499254	33715.0834556131
N.A.	XLOC_000192	protein phosphatase methylesterase 1 (s33 family)	♀	11.20428294688	N.S.	N.S.	51.6526184549419	10.54586781048	11.5273310259481
N.A.	XLOC_029236	rab6-interacting protein 2 elks erc	♀	11.0485984266957	N.S.	N.S.	78.1987460016495	39.2281662835515	37.9910019133769
N.A.	XLOC_026035	camp-dependent protein kinase catalytic subunit alpha	♀	11.028474447579	N.S.	2.32979681800719	885.68914570471	79.2250140840094	251.503145869163
N.A.	XLOC_012539	protein phosphatase methylesterase 1 (s33 family)	♀	11.0036259265775	N.S.	N.S.	64.1286723502895	11.7168589521194	15.0498538503777
N.A.	XLOC_022359	protein phosphatase methylesterase 1 (s33 family)	♀	10.7613991067462	N.S.	N.S.	156.181914022453	39.171245440759	28.7090998323066
N.A.	XLOC_034536	rab6-interacting protein 2 elks erc	♀	10.2599956341761	N.S.	N.S.	12.6697255012711	0	0.476502064732352
N.A.	XLOC_021903	rab6-interacting protein 2 elks erc	♀	10.158744019131	N.S.	N.S.	48.3383641945046	13.5795427173593	8.19515716536228
N.A.	XLOC_033191	protein phosphatase methylesterase 1 (s33 family)	♀	10.1447266660393	N.S.	N.S.	13.7335432901475	2.50115870633843	5.30304478250546
N.A.	XLOC_012604	rab6-interacting protein 2 elks erc	♀	9.63701112350134	N.S.	N.S.	18.6430875669755	3.03836866730872	6.18357659397135
N.A.	XLOC_004494	protein phosphatase methylesterase 1 (s33 family)	♀	9.55189909203589	N.S.	N.S.	18.4939149246618	0.736950276830467	2.51806401826878
N.A.	XLOC_021350	rab6-interacting protein 2 elks erc	♀	9.30440245548151	N.S.	N.S.	64.5936234742677	14.0504957694416	30.608804140181
Smp_001070	XLOC_006091	g-protein coupled receptor fragment	♀	9.09807094583894	N.S.	N.S.	86.4820763195176	10.3882875653952	27.0569323544779
N.A.	XLOC_018338	rab6-interacting protein 2 elks erc	♀	8.69519630639141	N.S.	N.S.	20.999223980409	3.587446461991	7.8917514505102
Smp_137640	XLOC_007811	rab6-interacting protein 2 elks erc	♀	8.66433314046961	N.S.	2.77161154829804	208.448654232935	246.743096948465	106.312175276965
N.A.	XLOC_016901	rab6-interacting protein 2 elks erc	♀	8.45560774455407	N.S.	N.S.	89.3800095373163	8.61616064748003	13.7000824325027
N.A.	XLOC_004842	protein phosphatase methylesterase 1 (s33 family)	♀	8.14062964721684	N.S.	N.S.	17.8402769335289	14.6159650783923	19.9279296640688
Smp_199150	XLOC_032456	rho guanine nucleotide exchange factor 3	♀	7.80743942671762	N.S.	3.3301429376935	207.833777560699	175.80225479639	122.074997625207
N.A.	XLOC_017621	rab6-interacting protein 2 elks erc	♀	7.71064605776394	15.5392565916904	5.45042852124202	69.0685204647628	17.2562575527167	30.0215821971135
N.A.	XLOC_012934	rab6-interacting protein 2 elks erc	♀	7.70079304378706	N.S.	N.S.	297.693252804452	79.7503632844944	66.7556748077065
N.A.	XLOC_001432	protein phosphatase methylesterase 1 (s33 family)	♀	7.49042127673738	N.S.	N.S.	44.4503195014866	3.50468119159196	9.8111193138529
Smp_149980	XLOC_016310	soluble guanylyl cyclase beta	♀	7.45018785632221	N.S.	N.S.	46.8270145594284	7.18520709968735	5.78841540895976
N.A.	XLOC_034734	protein phosphatase methylesterase 1 (s33 family)	♀	7.42890102839334	N.S.	N.S.	80.895658528378	3.72264345890258	12.5159545479429
N.A.	XLOC_021643	rab6-interacting protein 2 elks erc	♀	7.22159942508419	N.S.	N.S.	159.833226776392	34.9051424102016	51.4888566645594
N.A.	XLOC_014105	rab6-interacting protein 2 elks erc	♀	7.13927836217652	N.S.	N.S.	41.9245603206279	5.9775380299817	18.3770794303835
N.A.	XLOC_028811	protein phosphatase methylesterase 1 (s33 family)	♀	7.12503808296008	N.S.	N.S.	18.4071752260217	1.5505141582225	6.42191442550886
N.A.	XLOC_032097	rab6-interacting protein 2 elks erc	♀	6.94949707434061	N.S.	N.S.	31.0909397825341	14.7454884273976	27.8113922414583
N.A.	XLOC_024389	rab6-interacting protein 2 elks erc	♀	6.92831130370981	N.S.	N.S.	25.9735241109184	5.85692320480064	5.98160093021546
N.A.	XLOC_030828	gpi inositol deacylase pgap1	♀	6.89547014534102	N.S.	N.S.	47.8616044053473	19.0611574349299	37.6892503706284
Smp_003270	XLOC_021002	rab6-interacting protein 2 elks erc	♀	6.81787808170234	N.S.	N.S.	3671.05765631334	746.117411420253	1196.80083732685
N.A.	XLOC_004001	rab6-interacting protein 2 elks erc	♀	6.77292116996774	N.S.	N.S.	23.9169199789039	7.5810683979086	13.7858343510524
N.A.	XLOC_011811	protein phosphatase methylesterase 1 (s33 family)	♀	6.72184824893052	N.S.	N.S.	84.9296404447856	27.8951197693646	32.98124865473
Smp_038530	XLOC_026187	map kinase phosphatase	Switch	6.63174267429694	N.S.	0.245401239142788	15448.6412388144	608.512496447651	3591.57873504559
N.A.	XLOC_002933	rab6-interacting protein 2 elks erc	♀	6.55542352697123	N.S.	N.S.	354.664318790782	35.6253828527234	96.5173782843785
N.A.	XLOC_014825	rab6-interacting protein 2 elks erc	♀	6.55392302343643	N.S.	N.S.	135.812594379119	12.6343268452804	34.4162651902765
N.A.	XLOC_000167	protein phosphatase methylesterase 1 (s33 family)	♀	6.3177841772761	N.S.	N.S.	58.5870346842862	11.1432680544372	27.0606157933139
Smp_074710	XLOC_026234	def8 protein	♀	6.26232381250698	N.S.	N.S.	61.7577175892093	22.1258815682277	17.865490864482
N.A.	XLOC_000753	rab6-interacting protein 2 elks erc	♀	6.17805939191935	N.S.	N.S.	51.8602888103874	14.2043609284287	33.6220057792123
N.A.	XLOC_031866	protein phosphatase methylesterase 1 (s33 family)	♀	6.14970011217596	N.S.	N.S.	20.5758381555528	7.31682728306806	11.8729740744484
N.A.	XLOC_021553	protein phosphatase methylesterase 1 (s33 family)	♀	6.05867183987793	N.S.	N.S.	31.982670873164	7.43210918481062	10.6208816744803
N.A.	XLOC_018093	rab6-interacting protein 2 elks erc	♀	6.04785108248732	N.S.	3.64434613928204	102.115245319711	67.8376200355113	76.8971392145492
Smp_134500	XLOC_021606	calcium calmodulin-dependent -cyclic nucleotide phosphodiesterase	♀	5.97288058948037	0.160892224805909	N.S.	352.192026163611	55.4321067154924	86.7205379405541
N.A.	XLOC_019474	rab6-interacting protein 2 elks erc	♀	5.93485890759182	N.S.	N.S.	32.1643498352271	7.98743561107407	13.6719731654701
Smp_176360	XLOC_031864	protein kinase c type beta	♀	5.85176332955117	N.S.	N.S.	4243.56017194113	1510.92607648954	1763.45654669691
Smp_132210	XLOC_011304	f-box only protein 32-like	♀	5.64773607012749	N.S.	N.S.	12363.4254196773	767.319092462751	3664.18431309647
N.A.	XLOC_003141	rab6-interacting protein 2 elks erc	♀	5.61790082453772	N.S.	N.S.	673.407188296576	109.539336532195	245.28116818506	100*
Smp_175320	XLOC_030830	gpi inositol-deacylase	♀	5.60360294770053	N.S.	N.S.	420.573410077237	169.165376429324	213.674419851241
N.A.	XLOC_032732	rab6-interacting protein 2 elks erc	♀	5.58245018500452	N.S.	N.S.	27.0051942116081	3.4141136316051	11.1122710278029
Smp_131160	XLOC_016031	protein phosphatase methylesterase 1 (s33 family)	♀	5.55331459236125	2.78213946955223	N.S.	701.914355716732	382.787646727984	386.458428307886
Smp_149770	XLOC_016337	g-protein coupled receptor fragment	♀	5.53478964506293	N.S.	N.S.	51.6677716998386	14.4018138838197	34.815729825487
N.A.	XLOC_016039	rab6-interacting protein 2 elks erc	♀	5.49932105185338	N.S.	N.S.	28.7522365661376	14.2453080656652	16.1806989746192
Smp_180950	XLOC_008687	protein phosphatase methylesterase 1 (s33 family)	♀	5.46375525037293	N.S.	N.S.	743.564887154904	286.019475439192	272.111364095007
Smp_125450	XLOC_008905	Guanylate cyclase	Switch	5.33144611654441	N.S.	0.0381331826515678	262.61895489475	1.47874353336099	46.1832142910363
N.A.	XLOC_031523	rab6-interacting protein 2 elks erc	♀	5.32478395596744	2.73142816070618	N.S.	77.1669364016435	192.897526914189	46.5948718110466
Smp_163660	XLOC_027619	Adenylate kinase 7	♀	5.28335055640548	12.5818523116781	5.44254486492402	1058.04028525859	416.459381677214	1147.85513657152
Smp_200290	XLOC_003334	protein phosphatase methylesterase 1 (s33 family)	♀	5.2151755137017	N.S.	N.S.	229.382887198998	78.265478797958	76.820171503469
N.A.	XLOC_003870	rab6-interacting protein 2 elks erc	♀	5.17085601364524	9.61976099447531	N.S.	31.831989766813	30.8231975207563	13.4211301306149
N.A.	XLOC_017482	rab6-interacting protein 2 elks erc	♀	5.16648842545019	N.S.	N.S.	73.3009913185879	18.6667754674409	43.6988157354101
N.A.	XLOC_029164	protein phosphatase methylesterase 1 (s33 family)	♀	5.15163504967374	N.S.	N.S.	139.280631459066	36.3245995395495	50.5815088805053
N.A.	XLOC_030829	gpi inositol deacylase pgap1	♀	5.13834348810169	N.S.	N.S.	123.657065500546	50.0979761128424	56.1121932645635
Smp_144700	XLOC_021734	amp-activated protein kinase gamma regulatory subunit	♀	5.03524250721152	N.S.	N.S.	6515.33171815001	1253.92645399973	2118.62904637437
Smp_156890	XLOC_018607	protein kinase	♀	4.9559682423169	N.S.	2.39168855694696	271.650809122297	107.533618267756	183.250635451568
N.A.	XLOC_000322	rab6-interacting protein 2 elks erc	♀	4.92060379699376	N.S.	N.S.	32.3092100332781	3.70815703977063	16.8394179685181
Smp_150830	XLOC_016794	ras and ef-hand domain-containing isoform x1	♀	4.87809802281791	N.S.	N.S.	141.989139703125	26.5046564355213	32.040530917641
Smp_154900	XLOC_009746	rhogap protein	♀	4.8392292167195	N.S.	N.S.	42.5043675486966	4.34833485814643	10.8169954498114
Smp_058380	XLOC_023413	long-n-terminal adhesion gpcr	♀	4.83762125765483	N.S.	N.S.	1222.67254763629	61.8661284192516	516.898678800426
Smp_158490	XLOC_001772	ras guanine nucleotide exchange factor	♀	4.83305312021129	3.25730949874166	N.S.	399.898211764043	206.107519224503	183.678190518835
N.A.	XLOC_002535	rab6-interacting protein 2 elks erc	♀	4.82695558512106	N.S.	N.S.	126.928840822294	95.3335478781382	54.8470248997281
Smp_171610	XLOC_022096	dual specificity protein kinase ttk	♀	4.65794914999025	N.S.	N.S.	348.78268886838	197.214963033636	111.291053701074
Smp_161080	XLOC_024186	ran binding protein 9-related	♀	4.63943168477702	N.S.	N.S.	7173.94979591473	2454.50299943185	3084.12461916441
Smp_194610	XLOC_030298	camp-dependent protein kinase catalytic subunit prkx	♀	4.62151542121828	N.S.	N.S.	2231.46859384653	264.094791911323	877.21526505767
N.A.	XLOC_008696	rab6-interacting protein 2 elks erc	♀	4.59020825876879	N.S.	N.S.	52.3698407437204	20.8058556730708	31.8773162668384
N.A.	XLOC_023415	rab6-interacting protein 2 elks erc	♀	4.45984387224192	4.87412340771057	N.S.	55.1591345616079	45.9740946991668	24.8229732710687
N.A.	XLOC_001829	rab6-interacting protein 2 elks erc	♀	4.41608986837692	N.S.	N.S.	77.5172029330098	60.0438878260925	42.3109660051513
N.A.	XLOC_000285	rab6-interacting protein 2 elks erc	♀	4.37674423890781	7.46153943708017	N.S.	47.5721759486278	32.837171358635	28.3017294930324
N.A.	XLOC_007585	rab6-interacting protein 2 elks erc	♀	4.3151119682545	N.S.	N.S.	37.1420626896904	19.3279320952539	13.9638321842726
N.A.	XLOC_012690	rab6-interacting protein 2 elks erc	♀	4.30233529323558	3.60836205406674	N.S.	250.203975266957	78.6958149586512	116.153032882451
Smp_159190	XLOC_009545	thiamin pyrophosphokinase-related	♀	4.29545563816081	N.S.	N.S.	8287.6212655909	1691.52328054104	3119.26056748773
N.A.	XLOC_026994	rab6-interacting protein 2 elks erc	♀	4.09160009251158	N.S.	N.S.	114.259036720336	55.2807364838954	50.5689509449167
N.A.	XLOC_032553	protein phosphatase methylesterase 1 (s33 family)	♀	4.07708285816391	N.S.	N.S.	39.989067291851	3.03836866730872	11.9532736772892
N.A.	XLOC_012561	protein phosphatase methylesterase 1 (s33 family)	♀	4.00459455868712	2.66634045089168	N.S.	358.357926546617	192.04668846169	178.777648692854
N.A.	XLOC_009830	protein phosphatase methylesterase 1 (s33 family)	♀	3.94940525071778	N.S.	N.S.	143.571753835444	58.440687704013	73.7094740886332
N.A.	XLOC_026514	rab6-interacting protein 2 elks erc	♀	3.92871925629389	3.5098058512033	N.S.	124.520553475016	66.8115950285518	43.7096863826288
N.A.	XLOC_016531	iq motif and ankyrin repeat domain-containing protein loc642574	♀	3.92359000263406	N.S.	N.S.	49.0656345615076	43.859539522344	36.0149942504521
N.A.	XLOC_025996	rab6-interacting protein 2 elks erc	♀	3.85423565096174	N.S.	N.S.	145.526391086135	37.547575217973	48.1824992298238
Smp_118240	XLOC_000170	rab6-interacting protein 2 elks erc	♀	3.83197897551081	N.S.	4.42878874696335	556.360833356229	659.096012403767	582.951068339521
Smp_198220	XLOC_017596	protein phosphatase methylesterase 1 (s33 family)	♀	3.81970862360093	N.S.	N.S.	163.282700050383	82.0441966037647	49.2530839560784
N.A.	XLOC_000855	rab6-interacting protein 2 elks erc	♀	3.79151233449641	N.S.	N.S.	50.1704797021622	22.54109247746	38.0837202411947
Smp_127420	XLOC_006550	amp-activated protein kinase gamma regulatory subunit	Switch	3.74980843054616	N.S.	0.508066756589339	1411.73416498317	175.33691043942	599.109060489363
N.A.	XLOC_024001	protein phosphatase methylesterase 1 (s33 family)	♀	3.60203030113355	N.S.	N.S.	134.765316251368	77.1721129556632	102.830529765318
N.A.	XLOC_010939	and pleckstrin domain-containing protein 1	♀	3.5250092336221	N.S.	2.05466760678856	467.036745048477	277.43466431824	380.039636154412
N.A.	XLOC_024175	rab6-interacting protein 2 elks erc	♀	3.48406555309614	N.S.	N.S.	282.945398085202	81.4507535771027	159.252518860954
Smp_167640	XLOC_013969	atp gtp binding 2 isoform cra_a	♀	3.39126770764746	N.S.	N.S.	306.325741060766	28.4146637635254	153.743954903176
Smp_120920	XLOC_004441	tbcc domain-containing protein partial	♀	3.37318349672997	N.S.	N.S.	11137.6649361994	3699.29892583307	5156.86276948491
N.A.	XLOC_000274	protein phosphatase methylesterase 1 (s33 family)	♀	3.34282044001656	N.S.	N.S.	107.929744807185	102.185540286427	62.4940620834548
Smp_061940	XLOC_026133	adenylate kinase	♀	3.30028359041234	0.290766675541984	N.S.	31690.5299317005	5926.97983304157	11821.2389779888
Smp_136490	XLOC_024517	rab6-interacting protein 2 elks erc	♀	3.28002582385701	N.S.	N.S.	2231.93101562507	629.696383026698	1056.6783871163
Smp_176110	XLOC_033487	rab6-interacting protein 2 elks erc	♀	3.27040398044234	N.S.	N.S.	2418.7300317455	899.569868201919	1287.79168865922
Smp_056060	XLOC_006032	rhodopsin-like orphan gpcr	♀	3.2440511464289	N.S.	N.S.	199.971804650802	96.8175271351522	154.8545377221
N.A.	XLOC_005870	maguk p55 subfamily member	♀	3.18967071458428	N.S.	N.S.	312.547102081872	85.8693571875474	144.031930907144
Smp_057120	XLOC_004663	perq amino acid-rich with gyf domain-containing protein 2	♀	3.15602581112018	N.S.	N.S.	7399.44408834287	3619.20455578583	4458.3021536129
Smp_040550	XLOC_003004	protein tyrosine phosphatase prl	♀	3.0149215732563	N.S.	N.S.	3603.25823094848	1198.08566488899	2134.03992073372
Smp_021070	XLOC_008992	guanine nucleotide-binding 3 homolog	♀	3.00950505395543	0.420899134258296	N.S.	1540.86322470587	1714.25022635886	918.712494024511
Smp_004040	XLOC_000262	rab6-interacting protein 2 elks erc	♀	2.9587890718149	N.S.	N.S.	1233.85420146393	426.871226104782	698.668712084921
Smp_026810	XLOC_006797	protein phosphatase methylesterase 1 (s33 family)	♀	2.79207522117865	N.S.	N.S.	501.593675022169	56.1160043567735	198.024618285086
Smp_071390	XLOC_001080	adenylate kinase 1	♀	2.58632416940838	N.S.	N.S.	19664.1766999696	2181.90206542784	7425.43847907906
N.A.	XLOC_012453	protein phosphatase methylesterase 1 (s33 family)	♀	N.S.	Inf	N.S.	25.3285047255059	13.3069668492243	22.0399306316575
N.A.	XLOC_011588	protein phosphatase methylesterase 1 (s33 family)	♀	N.S.	Inf	N.S.	9.55646907769193	12.9799808112692	18.7555704557821
N.A.	XLOC_003550	protein phosphatase methylesterase 1 (s33 family)	♀	N.S.	Inf	N.S.	8.90626705557114	11.5339881684589	15.6767501010672
N.A.	XLOC_006028	rab6-interacting protein 2 elks erc	♀	N.S.	21.3465201529771	N.S.	9.57549287170204	14.090249206215	15.3571498090307
N.A.	XLOC_026820	rho gtpase activating protein	♀	N.S.	20.7820172065379	N.S.	6.99434694722892	14.4425885148931	21.0025454293766
N.A.	XLOC_015559	protein phosphatase methylesterase 1 (s33 family)	♀	N.S.	17.3953255322829	N.S.	2.00376345215737	24.3940783574926	0.686087383496795
N.A.	XLOC_006050	rab6-interacting protein 2 elks erc	♀	N.S.	16.239077992538	N.S.	45.3119275917498	17.9864172347423	23.0042294396074
N.A.	XLOC_020177	rab6-interacting protein 2 elks erc	♀	N.S.	15.4440451322766	N.S.	20.0212508327635	15.5528036772085	12.1594275747821
N.A.	XLOC_005402	protein phosphatase methylesterase 1 (s33 family)	♀	N.S.	14.3333605551407	N.S.	9.62597033583211	15.9980841594242	17.9352066289315
N.A.	XLOC_033094	rab6-interacting protein 2 elks erc	♀	N.S.	13.940073135263	N.S.	10.1671537335691	15.5877471547331	10.6137292573604
N.A.	XLOC_009896	rab6-interacting protein 2 elks erc	♀	N.S.	12.153484746315	3.93599140778372	38.4674488263988	40.3157086102462	33.1760418640251
N.A.	XLOC_008176	protein phosphatase methylesterase 1 (s33 family)	♀	N.S.	10.4956825126549	N.S.	45.3102768778398	30.8626964861435	63.3296424545731
N.A.	XLOC_018747	rab6-interacting protein 2 elks erc	♀	N.S.	8.08973391853537	N.S.	81.6326167221375	56.2216076063844	73.3542376441674
N.A.	XLOC_028710	rab6-interacting protein 2 elks erc	♀	N.S.	8.07332190395677	N.S.	32.98192972779	22.0888819147276	39.6203236662809
N.A.	XLOC_000702	rab6-interacting protein 2 elks erc	♀	N.S.	6.30977274752483	N.S.	29.1964124671014	45.4499229854791	64.5517642972641
N.A.	XLOC_008897	rab6-interacting protein 2 elks erc	♀	N.S.	5.46145548673386	N.S.	32.8394115111595	48.3236863196493	47.9234652667181
N.A.	XLOC_024018	rab6-interacting protein 2 elks erc	♀	N.S.	5.45555003683636	N.S.	31.6744558475846	32.2076486744741	75.5189932346354
N.A.	XLOC_026254	protein phosphatase methylesterase 1 (s33 family)	♀	N.S.	5.39856808887787	N.S.	44.5512573690857	29.6980392500635	46.77741641125
N.A.	XLOC_011141	protein phosphatase methylesterase 1 (s33 family)	♀	N.S.	5.10002578558216	N.S.	24.0879741311767	44.8876154383171	36.7332363985852
N.A.	XLOC_012807	rab6-interacting protein 2 elks erc	♀	N.S.	5.07834210098511	N.S.	90.4491690766187	99.4329115702752	75.9088098437928
N.A.	XLOC_002878	rab6-interacting protein 2 elks erc	♀	N.S.	4.53543582567657	N.S.	27.0224867786777	39.167879365501	31.4273582279492
N.A.	XLOC_031850	protein phosphatase methylesterase 1 (s33 family)	♀	N.S.	4.45912326657294	N.S.	72.0082741475953	54.2951579577718	54.2242892549438
N.A.	XLOC_033868	rab6-interacting protein 2 elks erc	♀	N.S.	4.44779677123453	N.S.	24.7905207130274	59.8125456079281	35.9470306029765
N.A.	XLOC_019971	rab6-interacting protein 2 elks erc	♀	N.S.	4.33291616395857	N.S.	66.4609205604397	87.1860269750467	77.506210505085	100*
N.A.	XLOC_008583	protein phosphatase methylesterase 1 (s33 family)	♀	N.S.	4.28101348516206	N.S.	35.645704435237	49.3655801107295	46.1884732564824
N.A.	XLOC_002632	protein phosphatase methylesterase 1 (s33 family)	♀	N.S.	4.01434543257889	N.S.	127.461838476098	54.3376162330468	72.7934886501324
Smp_165760	XLOC_021438	iq domain-containing protein h	♀	N.S.	3.90807488719842	N.S.	145.632938962964	59.2158484722723	189.95509573205
N.A.	XLOC_028340	rab6-interacting protein 2 elks erc	♀	N.S.	3.85275306094235	N.S.	191.222122998057	91.7811479535388	158.562362416991
N.A.	XLOC_024150	protein phosphatase methylesterase 1 (s33 family)	♀	N.S.	3.76458103986697	N.S.	51.2134633801466	60.6437576702408	83.0363362239268	100*
N.A.	XLOC_006933	rab6-interacting protein 2 elks erc	♀	N.S.	3.65609995955227	N.S.	71.4744753794164	56.6299768804301	76.0410653927093
N.A.	XLOC_015400	protein phosphatase methylesterase 1 (s33 family)	♀	N.S.	3.63517144726692	N.S.	169.320920820203	77.993754926715	183.784479126711
Smp_069400	XLOC_003748	regulator of g-protein signaling 3	♀	N.S.	3.45307890085497	3.84264469271797	120.142703851494	65.8264009600094	259.233748210424
N.A.	XLOC_028832	rab6-interacting protein 2 elks erc	♀	N.S.	3.38335576945534	N.S.	90.6944259551141	130.830872594533	134.135920637219
N.A.	XLOC_003247	rab6-interacting protein 2 elks erc	♀	N.S.	3.36504772717506	N.S.	78.5858225142167	66.7096706732354	87.6654154309246
N.A.	XLOC_029503	protein phosphatase methylesterase 1 (s33 family)	♀	N.S.	3.06480922481608	N.S.	90.3408816883526	104.094705488501	181.835681985057
N.A.	XLOC_027985	rab6-interacting protein 2 elks erc	♀	N.S.	3.0626120934024	N.S.	229.715247642552	145.908806096042	207.47711235386
Smp_000900	XLOC_006150	g-protein coupled receptor fragment	♀	N.S.	2.97220479588165	N.S.	331.764186086582	165.630140601988	477.198671079337
Smp_138040	XLOC_030981	pleckstrin-like protein domain-containing family a member 7	♀	N.S.	2.81919632776219	N.S.	385.229937691542	335.880938023593	480.719589395735
Smp_145510	XLOC_015307	protein phosphatase methylesterase 1 (s33 family)	♀	N.S.	2.78428168654262	0.263878445011041	1797.11326239429	177.733911255723	1143.21592302469
Smp_138850	XLOC_019204	sh2 domain-containing protein 4a	♀	N.S.	2.6922366548012	0.390227859480537	683.55824254411	260.546953858625	927.891268732263
Smp_178210	XLOC_033522	rab6-interacting protein 2 elks erc	♀	N.S.	2.56138171803897	N.S.	677.886483862006	283.758036967171	579.950958749154
Smp_211000	XLOC_016611	dedicator of cytokinesis protein 6	♀	N.S.	2.41111636704397	N.S.	673.693212625438	810.934121877993	1343.15656329479
N.A.	XLOC_012281	ras-related gtp-binding protein a	♀	N.S.	2.39653419479146	N.S.	871.138803645426	302.695281045625	530.405818952279
N.A.	XLOC_032587	protein phosphatase methylesterase 1 (s33 family)	♀	N.S.	N.S.	Inf	0.540705859768155	0.663051010287427	15.7997502104757
N.A.	XLOC_001235	protein phosphatase methylesterase 1 (s33 family)	♀	N.S.	N.S.	54.033813364775	1.15413094509334	0	14.1891591927228
N.A.	XLOC_020403	rab6-interacting protein 2 elks erc	♀	N.S.	N.S.	30.7514934290681	5.89972920058	29.7088113281594	8.18636702286209
N.A.	XLOC_016059	protein phosphatase methylesterase 1 (s33 family)	♀	N.S.	N.S.	13.4303945806423	9.03321813852165	4.46579863420085	11.1616015718217
N.A.	XLOC_008011	protein phosphatase methylesterase 1 (s33 family)	♀	N.S.	N.S.	13.3461166385528	3.71720653158876	17.4806601908474	33.3317331118883
N.A.	XLOC_013024	protein phosphatase methylesterase 1 (s33 family)	♀	N.S.	N.S.	12.7400386225163	0.469039283840516	4.81813794287894	10.6683208909137
N.A.	XLOC_008015	protein phosphatase methylesterase 1 (s33 family)	♀	N.S.	N.S.	11.9464035051019	3.2043808843638	7.83154729656274	16.7087825171502	100*
N.A.	XLOC_015142	protein phosphatase methylesterase 1 (s33 family)	♀	N.S.	N.S.	11.6927071287839	45.6669434625164	128.281054534227	275.887262415387
N.A.	XLOC_010346	protein phosphatase methylesterase 1 (s33 family)	♀	N.S.	N.S.	9.95517862457823	5.16439827885604	11.7946854902198	11.3467986194019
Smp_050380	XLOC_017743	protein kinase	♀	N.S.	N.S.	6.46081547537421	48.9700363351746	339.171754726053	196.747943343275
N.A.	XLOC_010113	protein phosphatase methylesterase 1 (s33 family)	♀	N.S.	N.S.	5.99622971835575	9.9843032154703	5.8523251969698	38.0043658681803
N.A.	XLOC_023940	protein phosphatase methylesterase 1 (s33 family)	♀	N.S.	N.S.	4.84050144095268	15.3742857261802	12.6907803828037	33.2321444218562	100*
Smp_127670	XLOC_021333	f-box only protein 5	♀	N.S.	N.S.	4.49481570024342	50.7705571518987	454.366387569144	119.345190232167
N.A.	XLOC_000221	rab6-interacting protein 2 elks erc	♀	N.S.	N.S.	4.46861579652877	31.5814047619258	45.2308862912381	26.8943758114983
N.A.	XLOC_006083	rab6-interacting protein 2 elks erc	♀	N.S.	N.S.	3.99748976737386	17.7892413199913	9.78523509885585	28.4280518504417
N.A.	XLOC_007019	rab6-interacting protein 2 elks erc	♀	N.S.	N.S.	3.95389725827513	10.9962136768664	66.7570261399441	32.0705002034534
Smp_131630	XLOC_009116	protein kinase	♀	N.S.	N.S.	3.89540132385408	97.0207632200208	11.5920403102473	168.382361532823
N.A.	XLOC_020948	protein phosphatase methylesterase 1 (s33 family)	♀	N.S.	N.S.	3.8511196911397	102.068478855456	87.4624576490331	144.25243381814
N.A.	XLOC_013061	tbc1 domain family member 19	♀	N.S.	N.S.	3.03292151274882	474.119674381409	368.30097679435	527.77756216091
Smp_080820	XLOC_024041	g-protein coupled receptor fragment	♀	N.S.	N.S.	2.79712381859411	36.3811935905779	89.0804352248789	95.2945715266737
N.A.	XLOC_031122	rho-related protein raci	♀	N.S.	N.S.	2.72205534900239	59.3927604537963	242.459843842061	97.2602121131079
Smp_140470	XLOC_010783	rab6-interacting protein 2 elks erc	♀	N.S.	N.S.	2.57856939299958	281.257004219291	145.206836935726	447.096799436163
Smp_156750	XLOC_005022	rab6-interacting protein 2 elks erc	♀	N.S.	N.S.	2.43368269196837	136.048678285286	259.888583441417	158.065285728423
Smp_194530	XLOC_009459	adenylate kinase isoenzyme 5-like	♀	N.S.	N.S.	2.41301829906305	310.992388151637	1777.77956186795	399.756557098972
Smp_170620	XLOC_005887	rhodopsin-like orphan gpcr	♀	N.S.	N.S.	2.37466034073617	296.970278656477	171.847796505757	237.465231377503
Smp_192490	XLOC_015792	protein phosphatase methylesterase 1 (s33 family)	♀	N.S.	N.S.	2.36883692693785	186.674164677176	137.718162895551	500.737384233393
Smp_162340	XLOC_024046	phosphatidylinositol 3-and 4-kinase	♀	N.S.	N.S.	2.32577749278444	226.232496026781	570.47947290737	328.406570377051
Smp_021190	XLOC_008972	histidine kinase	♀	N.S.	N.S.	2.25915913776691	149.55395369285	180.093021914147	373.375968519285
Smp_121460	XLOC_006588	rab6-interacting protein 2 elks erc	♀	N.S.	N.S.	2.17627690058699	682.265215655922	1229.77087653275	1003.22178489031
Smp_132730	XLOC_006476	g-protein coupled receptor fragment	♀	N.S.	N.S.	2.15688362888105	86.665734076007	287.293612018085	280.804446830391
Smp_030870	XLOC_020206	interleukin-1 receptor-associated kinase 1-binding protein 1-like isoform 1	♀	N.S.	N.S.	2.14706888076614	373.787715801737	652.533547652553	788.224214410028
Smp_125280	XLOC_004985	f-box only protein 16	♀	N.S.	N.S.	2.14337697363272	128.665970531738	91.0778134690616	276.389181455592
Smp_174780	XLOC_012816	rab-like protein 5	♀	N.S.	N.S.	2.08249949179734	181.208188597466	464.314361580891	342.782913411201
Smp_005790	XLOC_004992	guanine nucleotide binding protein (g protein) alpha q polypeptide	♂	0.364277223465268	N.S.	N.S.	2130.63581385725	3904.37406964388	4680.29546136654
Smp_094420	XLOC_008193	rab gdp-dissociation inhibitor	♂	0.358920433609317	N.S.	N.S.	6870.29236786879	8268.58823248103	9987.39327910667
Smp_059340	XLOC_029829	guanine nucleotide-binding protein g subunit alpha (adenylate cyclase-stimulating g alpha protein)	♂	0.358562463345213	0.440091878777263	N.S.	10089.2405568277	9597.46715643468	12892.2056709092
Smp_096310	XLOC_027134	atypical protein kinase c	♂	0.358209835505541	N.S.	N.S.	2134.85809792459	2899.83558062763	3372.96959531135
Smp_169960	XLOC_020181	dual specificity protein phosphatase 22-b-like	♂	0.351295432384793	N.S.	0.533878703907262	1545.60269657405	1311.16804832039	2518.943600283
Smp_164680	XLOC_029933	protein gap- isoform f	♂	0.348513878654051	N.S.	N.S.	1823.38444857383	1957.92969465038	3578.84141054696
Smp_157940	XLOC_027306	nuclear inhibitor of protein phosphatase 1-like	♂	0.343694584720966	N.S.	N.S.	1382.13239799115	2605.92031250663	2231.06119207548
Smp_135160	XLOC_026629	dual specificity protein phosphatase	♂	0.340746294872781	N.S.	0.323873902151107	1693.1371262729	461.384515199063	1553.70561267082
Smp_065130.2	XLOC_010205	gpi ethanolamine phosphate transferase partial	♂	0.337852658116369	N.S.	N.S.	1722.21701395261	1419.02946639419	2234.99712721806
Smp_204750	XLOC_030403	rab6-interacting protein 2 elks erc	♂	0.337416632452687	N.S.	N.S.	1229.43498336688	2308.29689907358	2502.70626144063
N.A.	XLOC_030428	ras-related protein rab-4b-like	♂	0.335516702646286	N.S.	N.S.	2947.35535415909	2018.26118175575	4281.91275856934
Smp_045860	XLOC_026524	histidine acid phosphatase	♂	0.335053605059389	N.S.	0.510696553713435	1511.70002553758	1088.12600248287	2300.65783444462
Smp_142450	XLOC_009406	ras-related protein rap-1b-like	♂	0.333316648141929	N.S.	N.S.	1835.39715384292	2297.03960084629	3258.74971123032
Smp_062680	XLOC_027154	gtp-binding protein parf	♂	0.331816903471949	N.S.	N.S.	1230.31366873537	893.342566378616	1629.2150209698
Smp_164450	XLOC_030129	protein phosphatase methylesterase 1 (s33 family)	♂	0.328146464433232	N.S.	N.S.	2829.98576382388	2648.38214646702	3801.18597891079
Smp_129110.2	XLOC_011749	protein phosphatase methylesterase 1 (s33 family)	♂	0.323490331847903	N.S.	N.S.	2440.86111471299	1450.69902403139	3037.17383068736
Smp_136470	XLOC_027394	rho rac guanine nucleotide exchange factor	♂	0.323187513938475	N.S.	N.S.	668.251241239188	239.868835864898	990.174087272694
Smp_161500	XLOC_028682	rhodopsin-like orphan gpcr	♂	0.316473535004012	N.S.	N.S.	169.201392226258	60.6114878723348	234.60342628938
Smp_049380	XLOC_002389	chimerin-related rho-gtpase-activating protein	♂	0.316241878901408	N.S.	N.S.	3355.99182781435	5542.09619571836	6101.26243107095
Smp_151620	XLOC_003078	rab6-interacting protein 2 elks erc	♂	0.315905246948121	N.S.	N.S.	961.345887745191	583.936718660931	1525.50652358178
Smp_084940.3	XLOC_012056	gtp-binding protein rit	♂	0.314670483357923	N.S.	N.S.	3935.28256582359	5257.64569811527	6162.23987776549
Smp_147500	XLOC_026086	maguk p55 subfamily member 7	♂	0.313681099085387	N.S.	N.S.	957.509315518961	1013.61849461553	1120.45381596038
Smp_005910	XLOC_004968	protein tyrosine phosphatase prl	♂	0.31077168924063	N.S.	N.S.	2588.59277555467	1235.37923990335	3182.67555491647
Smp_000670	XLOC_029435	centb5 protein	♂	0.310090674594638	N.S.	N.S.	4385.7955217383	2672.35794578152	6143.32334302694
Smp_073560.2	XLOC_003631	g beta-like protein gbl	♂	0.307969426126237	N.S.	N.S.	4139.29121999786	4972.22355663158	5730.42879403824
Smp_199770	XLOC_034143	schwannomin interacting	♂	0.304212439127403	N.S.	N.S.	567.017585797019	182.449398089014	1101.23693927812
Smp_059570	XLOC_020656	protein phosphatase methylesterase 1 (s33 family)	♂	0.30340025890065	N.S.	N.S.	279.974457994051	100.924392127009	384.797907206831
Smp_085240	XLOC_025051	diacylglycerol pyrophosphate (phosphatidic acid) phosphatase 1	♂	0.302646519086115	0.354059600804334	N.S.	5969.70354515465	4839.42862223363	5821.17279150802
Smp_163500	XLOC_028175	rab gdp gtp exchange	♂	0.299973599136643	N.S.	N.S.	1038.75370029902	720.478749020304	1681.09029214596
Smp_165330	XLOC_017099	gpn-loop gtpase 2-like	♂	0.295853054410005	N.S.	N.S.	350.108539589014	398.215474134243	378.119044363998
Smp_201220	XLOC_006687	casein kinase i isoform alpha	♂	0.292140863660196	0.268564728858905	0.460050122949817	3255.61031496467	4770.57409653237	3873.24676599903
Smp_134180	XLOC_022123	receptor tyrosine phosphatase type r2a	♂	0.288395087025107	N.S.	N.S.	1330.460882475	2102.17294259815	2750.14261400248
N.A.	XLOC_033029	f-box protein 30	♂	0.285440373964232	N.S.	N.S.	278.032310778295	212.811643680315	446.891377126126
Smp_012780	XLOC_001033	sterile alpha and tir motif-containing protein 1-like	♂	0.285357580888883	N.S.	N.S.	3847.97199475578	1458.21613341263	5571.19333032186
Smp_058190	XLOC_026214	iq domain-containing protein g	♂	0.280501243919413	N.S.	N.S.	1289.01960547461	523.93896335587	1679.04730164495
Smp_153270	XLOC_021974	phosphatidylinositol-4-phosphate 5-kinase related	♂	0.278006108889958	N.S.	N.S.	464.969437155579	371.72489553225	781.991729271892
Smp_164380	XLOC_020263	camp-dependent protein kinase catalytic subunit	♂	0.275880621244883	N.S.	N.S.	1799.79526304561	1086.431740007	2742.08872604019
Smp_128810	XLOC_008231	phosphatidylinositol glycan class m	♂	0.258005358888124	N.S.	N.S.	2584.54826487788	2221.26798918469	4209.71650833771
Smp_016630	XLOC_020689	Guanine nucleotide-binding protein G	♂	0.256601691744282	N.S.	N.S.	476.355882770202	895.092889853232	866.226650646018
Smp_126260	XLOC_022264	Serine/Threonine phosphatase	♂	0.25246804250116	N.S.	0.389730616409278	510.499118086501	319.271682165456	845.719035307325
Smp_133390	XLOC_029106	phosphatidylinositol glycan anchor biosynthesis class u protein	♂	0.247549164434481	N.S.	N.S.	2960.32533976994	3931.84403992758	4857.70014454458
Smp_082360	XLOC_021625	protein tyrosine kinase	♂	0.246673903823998	N.S.	N.S.	1191.28498972889	448.617589122454	1761.96169540307
Smp_025700	XLOC_004527	rab9 effector protein with kelch motifs isoform x1	♂	0.246488447760736	N.S.	N.S.	252.214531602438	502.437089335549	562.21539005523
Smp_152370	XLOC_025756	adp-ribosylation factor gtpase-activating protein 1 (adp-ribosylation factor 1 gtpase-activating protein) (arf1 gap) (arf1-directed gtpase-activating protein) (gap protein)	♂	0.242099483867784	N.S.	N.S.	4352.88697205684	4912.53330027647	6452.44255740244
Smp_130350	XLOC_012496	rab6-interacting protein 2 elks erc	♂	0.241410884838886	N.S.	N.S.	249.385700565202	455.727520147487	370.422512557611
Smp_155450	XLOC_023387	sh3 and multiple ankyrin repeat domains protein 12	♂	0.241092905973848	N.S.	N.S.	523.487007160867	329.94967146414	846.149111199172
Smp_159450	XLOC_023752	protein phosphatase methylesterase 1 (s33 family)	♂	0.234075933300664	N.S.	N.S.	466.374096341176	869.211393314761	799.848415316719
Smp_179610	XLOC_023248	gtpase-activating protein znf289	♂	0.23288109400287	0.365459690220217	N.S.	5540.38404776544	6177.26023109543	7003.47096619338
Smp_078310	XLOC_025902	ran-binding protein	♂	0.231407138402765	N.S.	N.S.	1697.05124539714	3092.42802996762	2559.27047560185
Smp_150970.2	XLOC_016154	protein phosphatase methylesterase 1 (s33 family)	♂	0.229955250657858	N.S.	N.S.	2082.18966475981	4394.52640564844	4742.55227349082
Smp_166930	XLOC_010025	adp-ribosylation factor-like protein 8b-like	♂	0.225227858564646	N.S.	N.S.	3469.72649077144	1964.51430305924	4674.67215681552
Smp_094480	XLOC_025951	guanine nucleotide-binding protein subunit beta	♂	0.22054028362406	0.273787152610403	0.504786745436972	9799.19300973909	12198.3674330515	11481.6676131872
Smp_212420	XLOC_031328	rhogef and pleckstrin domain protein	♂	0.216302277060637	N.S.	0.508427042489103	409.446820697846	345.899828247894	557.654241820127
Smp_176930	XLOC_002751	protein phosphatase methylesterase 1 (s33 family)	♂	0.215513433719927	N.S.	N.S.	4178.94786521619	1941.16622239719	5518.9755389271
Smp_064010	XLOC_016579	camp-response element binding	♂	0.213990335927886	N.S.	N.S.	2885.40206628567	3875.26421869769	6811.53343865225
N.A.	XLOC_005390	protein phosphatase methylesterase 1 (s33 family)	♂	0.212728771125331	N.S.	0.434527989146152	117.361673175347	30.1002981650948	161.389976319713
Smp_172110	XLOC_005585	shc transforming protein	♂	0.210113174210848	N.S.	N.S.	7334.51364392436	13890.4193457714	12332.8566714945
N.A.	XLOC_015818	protein phosphatase methylesterase 1 (s33 family)	♂	0.207150082535024	N.S.	N.S.	27.0528490149462	34.4403087485671	35.9580837755896
Smp_045610	XLOC_018517	rho gdp-dissociation inhibitor 2	♂	0.206126365946559	N.S.	N.S.	13577.046769322	14425.3361323247	18014.9980489027
N.A.	XLOC_017924	protein tyrosine phosphatase	♂	0.198206767996365	N.S.	N.S.	87.591178336283	263.228654861671	258.956116398394
Smp_015720	XLOC_022978	gtp-binding protein cg1354-like	♂	0.19725656144665	0.417032842058739	N.S.	4706.86358244272	14848.3388317014	7575.70183070328
Smp_140200	XLOC_021028	rab6-interacting protein 2 elks erc	♂	0.195057421882638	N.S.	N.S.	683.803468672256	309.024813233985	1117.71752651633
N.A.	XLOC_014343	rab6-interacting protein 2 elks erc	♂	0.192664156379901	N.S.	N.S.	58.0040064011321	45.30271014873	128.533751208307
Smp_194930	XLOC_026991	tbc1 domain family member 20	♂	0.190837951316013	N.S.	N.S.	1609.74085478583	1636.21355934838	2097.28717615218
Smp_021590	XLOC_021874	rac gtpase-activating protein 1	Switch	0.190567592810517	N.S.	2.72854678764702	168.040451035309	1328.12833596726	448.702031329155
Smp_198990	XLOC_031172	tyrosine-protein phosphatase non-receptor type partial	♂	0.190410060079823	N.S.	N.S.	82.7872990983129	101.669719857442	124.172038869026
Smp_048560	XLOC_022934	four and a half lim domains	♂	0.189935825870585	0.361712712307709	0.502828154227657	10482.6796298064	10812.1739201144	13483.0507298001
Smp_141230	XLOC_003818	dual specificity tyrosine-phosphorylation-regulated kinase 2	♂	0.188364174410437	N.S.	N.S.	242.641999673631	54.0290151531884	335.403098579353
N.A.	XLOC_017516	rab6-interacting protein 2 (erc protein 1)	♂	0.183208100600962	N.S.	N.S.	513.214897358008	851.587457662234	1051.00278274527
N.A.	XLOC_032044	rab6-interacting protein 2 elks erc	♂	0.182830145559925	N.S.	N.S.	31.1892121907152	8.73349686362977	44.683863407199
Smp_210430	XLOC_002493	rab-protein 8	♂	0.177765726433204	N.S.	N.S.	16063.3748111136	16704.8771338548	20449.9996913835
Smp_210980	XLOC_018294	protein phosphatase-1	♂	0.173181982119599	N.S.	N.S.	655.831520305866	996.620618163271	1235.6563931273
Smp_165570	XLOC_022732	ras-dva small gtpase	♂	0.172650749639414	N.S.	N.S.	41.2147995437809	23.0902032925935	52.5491421349483
Smp_203160	XLOC_020334	protein phosphatase methylesterase 1 (s33 family)	♂	0.171841722137129	N.S.	N.S.	39.5266941453844	6.25065586134035	43.858862210906
Smp_204020	XLOC_024462	rhodopsin-like orphan gpcr	♂	0.170718033725084	N.S.	N.S.	28.2352570991129	11.8259891880244	35.3627746972683
Smp_126160	XLOC_025096	poly atp nad kinase	♂	0.169166660214648	N.S.	0.420044156565452	650.111222366075	459.373770859643	761.287398657211
Smp_144590	XLOC_005143	protein gap- isoform g	♂	0.165178809726234	N.S.	N.S.	2087.04784294092	1785.53912018486	4704.76039082122
Smp_014660.2	XLOC_008044	rab-related gtp-binding protein	♂	0.159786978748617	N.S.	N.S.	8134.82896334796	7378.48686711471	10838.6180525382
Smp_064900	XLOC_026569	histidine kinase	♂	0.158801202496476	N.S.	N.S.	433.971726103333	429.554650759836	834.253508188866
Smp_157050	XLOC_033770	rhodopsin-like orphan gpcr	♂	0.158065829469123	N.S.	N.S.	160.10282116013	38.8803739423224	278.37298326796
Smp_163580	XLOC_028201	rab family	♂	0.156653027986062	N.S.	N.S.	5663.08112864078	6148.03989787927	7536.95292137541
Smp_211230	XLOC_006263	soluble guanylate cyclase gcy	♂	0.155253844399243	N.S.	0.112424859242261	46.7594733614139	1.61796355442852	35.6454439577904
Smp_072450	XLOC_005783	rhodopsin-like orphan gpcr	♂	0.150320110068234	N.S.	0.22400605351498	284.713296738299	55.5009583581858	333.466877932241
Smp_035380	XLOC_003816	a-kinase anchor protein 14	♂	0.148547674561351	N.S.	N.S.	79.7616371250637	23.5406130332016	127.164661533832
Smp_047870	XLOC_010559	protein kinase	♂	0.14555984676646	N.S.	N.S.	4482.81688276214	2201.85276224474	6153.40528817805
Smp_063640	XLOC_005707	g protein beta subunit	♂	0.141518925116905	0.426499121475742	N.S.	5175.89009640187	14817.837876244	11999.7031720088
N.A.	XLOC_002898	rab6-interacting protein 2 elks erc	♂	0.14073333751548	N.S.	N.S.	33.2226826452963	19.2890613461719	39.4770335155627
N.A.	XLOC_016787	protein phosphatase methylesterase 1 (s33 family)	♂	0.138163084436943	N.S.	N.S.	21.865674168722	9.30292525144403	39.2313529086636
Smp_174110	XLOC_025990	protein phosphatase 1 regulatory inhibitor subunit 16b isoform x2	♂	0.136565910823832	N.S.	0.405762466523808	1018.83624251063	593.05116760186	1314.69324450593
N.A.	XLOC_029464	protein phosphatase methylesterase 1 (s33 family)	♂	0.133471330775008	N.S.	N.S.	14.5745942573997	13.1119215069386	15.6027017170107
Smp_019280	XLOC_006478	camp-dependent protein kinase r2	♂	0.132471245760391	N.S.	N.S.	895.315128605711	444.48674302322	1561.38923698804
Smp_173550	XLOC_023307	inositol -containing protein	♂	0.131211735150052	0.320329825759659	0.437240294798594	4524.32624985329	3771.44571235973	5425.97504121327
N.A.	XLOC_013668	ocrl type ii inositol 5-phosphatase	♂	0.131134795420962	N.S.	N.S.	29.124882890484	13.1514097596637	42.1067771908995
Smp_022810	XLOC_025160	ras-related protein rab-2a-like isoform 2	♂	0.130222678670717	0.391835778497925	0.233187790264684	2938.34696371811	1368.94879296846	4168.22474036683
Smp_034840.3	XLOC_000709	tyrosine 3-monooxygenase tryptophan 5-monooxygenase activation epsilon polypeptide	♂	0.129020908773691	N.S.	N.S.	53360.0951006234	62478.9622064995	86722.3962693948
N.A.	XLOC_003127	rab6-interacting protein 2 elks erc	♂	0.126947819837456	N.S.	N.S.	28.223283037411	12.3258395379512	41.0317696426589
Smp_021260	XLOC_002268	protein phosphatase 1 regulatory subunit 3d	♂	0.124012810838732	N.S.	N.S.	130.31228452989	47.9089592600321	181.538016488945
Smp_158480	XLOC_004919	AMP dependent ligase	Switch	0.123310907660054	N.S.	14.5228290905736	108.759128797649	888.330561072497	1588.43114264222
N.A.	XLOC_018295	rab6-interacting protein 2 elks erc	♂	0.122839060538751	N.S.	N.S.	17.6607817730035	12.6437678328113	32.638315362539
Smp_123020	XLOC_008445	protein serine threonine kinase	♂	0.122468651585282	N.S.	N.S.	838.076952188535	722.76160903509	1864.56499377578
N.A.	XLOC_015180	protein phosphatase methylesterase 1 (s33 family)	♂	0.1206050566634	N.S.	N.S.	81.0444630702474	26.5639202977035	173.995859299387
Smp_136190	XLOC_001364	rho gtpase	♂	0.12016812102218	N.S.	N.S.	2269.14688807818	2023.24952026848	3452.86164764057
Smp_142050	XLOC_032562	erk-like protein	♂	0.119381274642652	N.S.	N.S.	1789.59139232675	607.502695936864	2478.49562684755
N.A.	XLOC_017426	rab6-interacting protein 2 elks erc	♂	0.117287496810162	N.S.	N.S.	18.5828953019656	8.86568131802326	35.4990262677034
Smp_199720	XLOC_034108	maguk p55 subfamily member 7	♂	0.112864308712924	N.S.	0.402303669366402	109.864173217445	123.653213464989	174.715961692571
Smp_137600	XLOC_022062	phosphatidylinositol-glycan biosynthesis class s protein	♂	0.111983097810586	0.263785666980887	N.S.	491.809876242199	838.213357801074	543.500835427979
Smp_128760	XLOC_009970	protein phosphatase methylesterase 1 (s33 family)	♂	0.110769531367753	N.S.	N.S.	752.264763897227	396.264937561417	1283.37027475828
Smp_083080	XLOC_005046	activator of 90 kda heat shock protein atpase homolog 1	♂	0.106543947941191	N.S.	N.S.	8801.38768275326	17640.4452627891	15367.5174022821
Smp_021390	XLOC_025815	iq domain-containing protein e	♂	0.106189137722195	N.S.	N.S.	402.815602530627	95.9877017256866	493.211881042361
N.A.	XLOC_006442	protein phosphatase methylesterase 1 (s33 family)	♂	0.105202594386238	N.S.	N.S.	33.0080601312343	8.48704098913157	50.7649070138716
Smp_131980	XLOC_026264	tachykinin-like receptor	♂	0.101581189613974	N.S.	N.S.	55.8339554354673	81.1895473125694	151.408616350818
N.A.	XLOC_032824	rab6-interacting protein 2 elks erc	♂	0.101143776758778	N.S.	N.S.	26.7499783382067	7.38911965897413	42.9362350421529
Smp_090220	XLOC_023927	feline leukemia virus subgroup c receptor-related	♂	0.0934866597098038	N.S.	N.S.	1458.09170616817	1725.50093446525	2430.61200959855
Smp_057410	XLOC_021530	rab effector	♂	0.0929219602814525	N.S.	0.281660177021885	1761.11104706238	191.739615616001	2184.47711993407
Smp_024520	XLOC_009924	rab gdp-dissociation inhibitor	♂	0.0924932294293267	N.S.	N.S.	3605.65787013781	3826.75406028024	6539.14207010358
N.A.	XLOC_014776	rab6-interacting protein 2 elks erc	♂	0.0920934192801955	N.S.	N.S.	17.5708469611585	0.577038938163183	9.95385546292072
Smp_009020	XLOC_016478	rac guanyl-nucleotide exchange factor	Switch	0.0887566289247557	N.S.	2.11020164599309	95.2597727640242	213.496109178342	256.42517413122
N.A.	XLOC_015235	protein phosphatase methylesterase 1 (s33 family)	♂	0.0881952221612222	N.S.	N.S.	26.5026899014234	9.10783617604503	43.7189461725268
Smp_196020	XLOC_024940	phosphatidylinositol-glycan biosynthesis class s protein	♂	0.0852184231965349	0.343058182660398	0.4128131041848	1595.10201672073	1468.00916098404	2118.44748142469
Smp_172890	XLOC_017927	protein tyrosine phosphatase receptor type b	♂	0.0832522427839951	N.S.	N.S.	107.875480626698	243.01195004988	329.715281451003
N.A.	XLOC_014028	protein phosphatase methylesterase 1 (s33 family)	♂	0.0805719997237098	N.S.	N.S.	19.1212968338843	4.19516088165362	16.3120877129309
Smp_143690	XLOC_018661	feline leukemia virus subgroup c receptor-related protein 1	♂	0.0800925155260876	N.S.	0.31103053894071	1592.78417497332	617.159151798065	2293.72850394796
Smp_144890	XLOC_015673	camp-response element binding protein	♂	0.075669937746317	N.S.	N.S.	1370.86955560794	689.074477457987	2339.18142098859
N.A.	XLOC_016471	protein phosphatase methylesterase 1 (s33 family)	♂	0.0741203493108842	N.S.	N.S.	20.9317856066485	5.41640066234855	47.524110672711
Smp_172250	XLOC_019089	inositol 5-phosphatase	♂	0.0670034033441749	N.S.	0.459234279148872	2241.84192893195	1805.15690408512	3465.16725170861
N.A.	XLOC_032083	rab6-interacting protein 2 elks erc	♂	0.0624279508135813	N.S.	N.S.	44.8548183348268	19.3268671678406	50.7594555660954
N.A.	XLOC_023451	protein phosphatase methylesterase 1 (s33 family)	♂	0.060987362576405	N.S.	N.S.	20.7238944990515	5.23124251821889	27.8824760858917
N.A.	XLOC_026615	rab6-interacting protein 2 elks erc	♂	0.0569397683289921	N.S.	N.S.	18.1052575160603	3.87989369218166	15.8327674353266
Smp_156220	XLOC_019568	receptor tyrosine phosphatase type r2a	♂	0.0484500106924245	N.S.	0.496249571830176	291.631863106265	131.039626327255	475.009161362152
N.A.	XLOC_013779	protein phosphatase methylesterase 1 (s33 family)	♂	0.0436430171327039	N.S.	N.S.	109.229459826725	32.7188888401816	201.377839356463
N.A.	XLOC_009557	protein phosphatase methylesterase 1 (s33 family)	♂	0.0413733344339836	N.S.	N.S.	12.2751298978685	3.78205630631367	9.97504670256602
N.A.	XLOC_016022	rab6-interacting protein 2 elks erc	♂	0.0384198033021981	N.S.	N.S.	12.6773080287688	2.23934443767897	14.4724230039287
N.A.	XLOC_017367	protein phosphatase methylesterase 1 (s33 family)	♂	0.038417750639206	N.S.	N.S.	6.84299040496935	1.46716319148646	8.82509360914725
N.A.	XLOC_011980	maguk p55 subfamily member	♂	0.0340248043177427	N.S.	N.S.	30.2085377886901	25.4162198260081	56.524234092998
N.A.	XLOC_009152	protein phosphatase methylesterase 1 (s33 family)	♂	0.0331107574782693	N.S.	N.S.	29.8514174122036	14.7856156090901	45.6839211314667
Smp_137450	XLOC_014128	rab6-interacting protein 2 elks erc	♂	0.0302851932493601	0.396263691267484	N.S.	1789.90314976983	1414.74549049333	1932.89206705845
Smp_170870	XLOC_018943	receptor-type tyrosine-protein phosphatase v-like	♂	0.028458303708277	N.S.	0.37769146921902	1079.14030531486	486.991604304155	1649.71805757695
Smp_151960	XLOC_026986	rho gtpase-activating protein 22 isoform x2	♂	0.0278590560052013	N.S.	N.S.	389.948689875224	144.404536660759	633.234348808652
Smp_168990	XLOC_023454	adenylate cyclase	♂	0.0277295063595521	N.S.	N.S.	221.444646741015	252.946596404143	269.059277097945
Smp_163490	XLOC_027970	gtpase-activating protein	♂	0.0276880563250399	N.S.	N.S.	2095.88723542394	1822.76181413512	4087.99575989763
N.A.	XLOC_019567	receptor tyrosine phosphatase type r2a	♂	0.0264250400643303	N.S.	N.S.	18.2188433597725	6.91050380301594	21.3433458881102
N.A.	XLOC_025265	protein phosphatase methylesterase 1 (s33 family)	♂	0.024347725847767	N.S.	0.0475404638326552	19.7332320373306	1.11937937067099	24.3540429911565
N.A.	XLOC_027912	protein phosphatase methylesterase 1 (s33 family)	♂	0.0234871751879636	N.S.	N.S.	20.4390561158724	52.258228494675	22.3678470684064	100*
N.A.	XLOC_000542	rab6-interacting protein 2 elks erc	♂	0.023051859902898	N.S.	N.S.	52.0404333665327	22.4677565028264	86.979421328732
N.A.	XLOC_009977	protein phosphatase methylesterase 1 (s33 family)	♂	0.0222407339125737	N.S.	N.S.	259.061326559471	122.49826583428	457.034887291984
Smp_153390.2	XLOC_018464	ectonucleotide pyrophosphatase phosphodiesterase	♂	0.0210858463073511	N.S.	N.S.	5287.68270157815	6844.23490679712	7111.6025058028
Smp_003230	XLOC_000409	sh3-domain grb2-like endophilin b1	♂	0.020186787383262	N.S.	N.S.	3695.46668985318	2531.23404161779	5468.85569410926
N.A.	XLOC_028042	protein phosphatase methylesterase 1 (s33 family)	♂	0.018481390995979	N.S.	0.205185044984222	178.288124284824	50.5271098186171	167.580523586438
N.A.	XLOC_004774	protein phosphatase methylesterase 1 (s33 family)	♂	0.0170317172361507	N.S.	N.S.	15.117564139298	0.843653666554472	18.6098681824505
N.A.	XLOC_012479	protein phosphatase methylesterase 1 (s33 family)	♂	0.0167022700708893	N.S.	N.S.	45.097222998486	19.2171524487436	66.594176301506
N.A.	XLOC_032636	protein phosphatase methylesterase 1 (s33 family)	♂	0.0161835474091642	N.S.	N.S.	816.761217133059	1419.77474219044	1081.37513836956
N.A.	XLOC_029196	protein phosphatase methylesterase 1 (s33 family)	♂	0.0144820774090148	N.S.	N.S.	17.7345133424706	8.26369377889726	26.3021360956807
Smp_137050	XLOC_016437	g-protein coupled receptor fragment	♂	0.0144731428943289	N.S.	0.164159416645674	16.438300923742	2.35060331526559	26.7668651337499
Smp_017730	XLOC_022039	gpi-anchored surface glycoprotein	♂	0.0127438900401984	N.S.	0.247125590284399	33053.250360535	7348.67795962922	52064.7691794877
N.A.	XLOC_032750	protein phosphatase methylesterase 1 (s33 family)	♂	0.0126276795507812	N.S.	0.227304747967307	39.1080723071453	2.18342215071716	38.3790652244519
N.A.	XLOC_027950	protein phosphatase methylesterase 1 (s33 family)	♂	0	N.S.	N.S.	5.86281325372244	1.35590431389984	6.68104791812554
N.A.	XLOC_033615	rab6-interacting protein 2 elks erc	♂	0	N.S.	N.S.	6.88846454817237	1.32794317041894	15.986912654473
N.A.	XLOC_001492	protein phosphatase methylesterase 1 (s33 family)	♂	0	N.S.	0	9.02422222067225	0.20856379974795	12.6719870574608
N.A.	XLOC_005953	rab6-interacting protein 2 elks erc	♂	0	N.S.	N.S.	10.27160464937	11.8085862130147	12.3250711080973
N.A.	XLOC_033500	rab6-interacting protein 2 elks erc	♂	0	N.S.	N.S.	10.3017880591116	3.88716351806281	19.1798434465851
N.A.	XLOC_001680	protein phosphatase methylesterase 1 (s33 family)	♂	0	N.S.	N.S.	11.6109880141033	1.91438057614479	17.8301823830895
N.A.	XLOC_000596	protein phosphatase methylesterase 1 (s33 family)	♂	0	N.S.	0.038614175059419	16.2339646915633	1.87033683555707	11.2745271713373
N.A.	XLOC_029175	protein phosphatase methylesterase 1 (s33 family)	♂	0	N.S.	N.S.	19.7784691075257	17.4805534915449	36.4042935470389
N.A.	XLOC_017320	protein phosphatase methylesterase 1 (s33 family)	♂	0	N.S.	N.S.	32.0636470836185	8.35106776978925	58.132888883742
N.A.	XLOC_002001	rab6-interacting protein 2 elks erc	♂	0	N.S.	N.S.	38.7062922334262	3.71998235351438	70.9776021731962
N.A.	XLOC_018578	protein phosphatase methylesterase 1 (s33 family)	♂	0	N.S.	0.460385078368961	282.449099395609	74.1556307536043	405.582222395632
Smp_063830	XLOC_032177	gmp synthase	♂	N.S.	0.470059614787412	N.S.	4498.08452320319	8543.41062065388	6200.87034591784
Smp_138960	XLOC_020224	erlin-2 precursor	♂	N.S.	0.460855169587973	N.S.	1516.08406330185	3125.86952026263	1781.35876038132
Smp_073620	XLOC_000453	protein tyrosine non-receptor type 11	♂	N.S.	0.460484574767779	N.S.	5157.68232572748	9386.46772977172	4730.85733998233
Smp_002410	XLOC_010977	14-3-3 epsilon2 isoform	♂	N.S.	0.455283082525785	N.S.	10322.4388739721	24668.2530758751	15908.6430237659
Smp_022700.2	XLOC_034014	protein tyrosine phosphatase-like protein	♂	N.S.	0.446624112628592	N.S.	3323.64651503939	2043.80141641786	2327.24030326198
Smp_087810	XLOC_020174	gtp binding protein	♂	N.S.	0.4337591188891	N.S.	2812.47219746395	4416.34782649792	3151.88026690948
Smp_125550	XLOC_025311	protein ric1 homolog isoform x1	♂	N.S.	0.432818304972336	0.398739655005912	4333.70747157723	2201.67104636056	3662.99995551727
Smp_071250	XLOC_012261	member of ras oncogene family	♂	N.S.	0.4318823823186	N.S.	10129.1409922471	14095.0693591265	13768.7916812326
Smp_164880	XLOC_022018	g protein	♂	N.S.	0.427602932910116	N.S.	6249.58002679179	7132.85194388826	8850.39728012841
Smp_025010	XLOC_020409	casein kinase beta polypeptide	♂	N.S.	0.426854845674635	N.S.	7489.17403212106	9818.19074355128	8900.88478934351
Smp_057140	XLOC_001525	tbc1 domain family member	♂	N.S.	0.426036306558514	N.S.	5911.97670910737	8036.24717083205	6769.66512584172
Smp_067810	XLOC_014748	protein kinase	♂	N.S.	0.425033980615393	N.S.	8654.89132071798	12890.1371285546	10485.3833613505
Smp_143130	XLOC_023400	four and a half lim domains	♂	N.S.	0.415824023828807	N.S.	10106.9964096175	3473.74322634209	6589.20451276226
Smp_212370	XLOC_032549	snf4 amp-activated protein kinase gamma isoform f	♂	N.S.	0.404767901966235	N.S.	1833.63316916307	632.637449819193	1189.22648547182
Smp_075130	XLOC_012826	guanine nucleotide-binding protein beta 5 (g protein beta5)	♂	N.S.	0.402385759861803	N.S.	2563.49222399461	1575.72659924976	3190.62870291087
Smp_105970	XLOC_011650	gpi-anchored membrane protein 1	♂	N.S.	0.391236768410409	N.S.	9452.00733061326	27659.7261051423	12362.5449111573
Smp_153160	XLOC_031359	adenylate kinase	♂	N.S.	0.386209641263412	N.S.	865.000601613055	1053.67894869971	585.01182997692
Smp_072140	XLOC_005523	rho2 gtpase	♂	N.S.	0.383496826151228	N.S.	16148.3542353933	20929.8023478361	21890.8777657593
Smp_162260	XLOC_019984	phosphatidylinositol-binding clathrin assembly protein	♂	N.S.	0.38168131555798	N.S.	2449.20109722968	2386.61753657568	2985.04554421975
Smp_146140	XLOC_025375	rab6-interacting protein 2 elks erc	♂	N.S.	0.381490321197676	0.48040467735603	4235.63306772589	4722.6699067146	4512.47656400732
Smp_050700	XLOC_016394	phosphatidylethanolamine-binding protein	♂	N.S.	0.365524079237394	N.S.	2821.23140130688	4295.58215130385	3096.02994706515
Smp_211040	XLOC_014876	protein phosphatase methylesterase 1 (s33 family)	♂	N.S.	0.364075764498877	N.S.	1882.17122206799	2045.24894411582	2136.61562208948
Smp_033760.2	XLOC_010768	soluble guanylate cyclase 88e	♂	N.S.	0.347455974723878	N.S.	5840.41331871447	11035.1759797641	6225.58402515124
Smp_142990	XLOC_024819	snf1a amp-activated protein kinase	♂	N.S.	0.344369660350802	N.S.	6582.416266917	6113.32063533843	6655.95879775417
Smp_009760	XLOC_006383	tyrosine 3-monooxygenase tryptophan 5-monooxygenase activation beta polypeptide	♂	N.S.	0.32698537806758	N.S.	66630.813789179	132260.607823623	96319.6751100983
Smp_102040	XLOC_033639	guanine nucleotide-binding protein subunit beta 2-like 1	♂	N.S.	0.321394418296573	N.S.	38714.3124546724	79328.621138749	26984.5618342521
Smp_078050	XLOC_029314	rab6-interacting protein 2 elks erc	♂	N.S.	0.312081312810942	0.515331032289746	1839.5820243924	2204.76628537841	2435.22001467927
N.A.	XLOC_031317	rab6-interacting protein 2 elks erc	♂	N.S.	0.311586653352553	N.S.	80.2044069953979	121.626592345914	77.5595802985009
Smp_000740	XLOC_006174	phosphatidylinositol-4-phosphate 5- type alpha	♂	N.S.	0.309619141924491	N.S.	13356.6212113198	20708.4948077251	17134.1155253315	100*
Smp_059290	XLOC_022595	dual specificity protein phosphatase 23	♂	N.S.	0.291085232022818	0.48126907644784	3963.67288186192	5468.59986137819	3910.46850461978
Smp_030400	XLOC_029303	camp-dependent protein kinase type i-beta regulatory subunit	♂	N.S.	0.28953133839949	N.S.	3331.46518557275	4322.36842526322	3717.79017078742
Smp_079430	XLOC_000472	gtp-binding nuclear protein ran	♂	N.S.	0.264986225734199	N.S.	14983.4146287144	37580.9391374069	20145.7516946857
N.A.	XLOC_013754	protein phosphatase methylesterase 1 (s33 family)	♂	N.S.	0.0308078724217424	N.S.	3.39823180606847	10.7010224225288	8.08306050626292
Smp_135790	XLOC_032940	intersectin-1 (sh3 domain-containing protein 1a)	♂	N.S.	N.S.	0.5389038165184	12204.0749071429	6775.99943231063	12623.8159732082
Smp_011660	XLOC_025768	protein kinase	♂	N.S.	N.S.	0.535854678873729	5432.60981561767	4373.14706691833	5970.65998347134
Smp_131250	XLOC_019744	protein ndrg3	♂	N.S.	N.S.	0.520631954241717	8876.79251367923	3696.49407897084	9123.43044455982
Smp_197450	XLOC_012335	membrane-associated phosphatidylinositol transfer protein 1	♂	N.S.	N.S.	0.508632299098469	1210.07567449646	698.268161018282	1359.30729407517
Smp_066370	XLOC_033554	dep domain-containing	♂	N.S.	N.S.	0.481021264236047	298.089329431908	192.694366089663	387.153976278489
Smp_124660	XLOC_010400	guanyl-nucleotide exchange factor	♂	N.S.	N.S.	0.479559746036602	1404.76685065483	650.573729401009	1969.28146887195
Smp_197540	XLOC_013192	poly atp nad kinase	♂	N.S.	N.S.	0.476559257425491	6999.15015808045	4186.4690185109	7744.22964424794
Smp_000870	XLOC_006155	and ph domain-containing protein 4	♂	N.S.	N.S.	0.465268549625531	2144.90703563378	689.59149258417	1532.50899302209
N.A.	XLOC_014975	rab6-interacting protein 2 elks erc	♂	N.S.	N.S.	0.441574426189753	3940.85503467832	2217.32797985934	3736.4649014074
Smp_194270	XLOC_033574	casein kinase i isoform alpha	♂	N.S.	N.S.	0.439972325581376	1728.95415431415	1464.46718219895	2494.95153382187
Smp_080550	XLOC_025535	developmentally-regulated gtp-binding protein 2	♂	N.S.	N.S.	0.436332706793178	3531.44471550002	1421.15947407742	1927.27495678133
N.A.	XLOC_001306	phosphatidylinositol- -bisphosphate 3-kinase catalytic subunit alpha pi3k	♂	N.S.	N.S.	0.432658511325086	301.501455403044	121.463679327731	371.48855564717
Smp_126170	XLOC_022205	rab gtpase-binding effector protein 1	♂	N.S.	N.S.	0.422196275235914	2762.43579982683	1289.48044275799	3071.07646180657
Smp_017710	XLOC_024915	rab11 family-interacting protein 3	♂	N.S.	N.S.	0.404950384924615	4830.13220329454	1776.99260092329	5738.81454371823
Smp_139070	XLOC_022175	3bp-1 related rhogap	♂	N.S.	N.S.	0.36144451058031	3100.39944899349	788.692296274372	3387.77592473073
Smp_151100	XLOC_031052	cgmp-dependent protein	♂	N.S.	N.S.	0.356598686657362	2667.11700382416	952.229239616924	2344.20296006398
Smp_035290	XLOC_000654	protein phosphatase methylesterase 1 (s33 family)	♂	N.S.	N.S.	0.353802007990198	405.367397173853	33.7086616834791	321.552814446675
Smp_089460.2	XLOC_007532	protein phosphatase methylesterase 1 (s33 family)	♂	N.S.	N.S.	0.349942109557338	15228.8580280445	3326.91639445939	14175.1468821838
Smp_154010	XLOC_022599	halobacterial transducer protein vi	♂	N.S.	N.S.	0.349147985828361	7130.74645232717	2609.10739921446	14167.8347708355
N.A.	XLOC_022472	rab6-interacting protein 2 elks erc	♂	N.S.	N.S.	0.335859344922369	66.3747724464587	42.0011472740635	87.0172680921795
N.A.	XLOC_032791	small g protein signaling modulator 2 isoform x6	♂	N.S.	N.S.	0.335440981606962	176.504867197238	31.6511765687194	140.514559670493
Smp_167660	XLOC_013892	Protein phosphatase 1 regulatory subunit 3	♂	N.S.	N.S.	0.324838022327866	1072.56585230046	152.359564946421	756.554731523822
N.A.	XLOC_018919	rab6-interacting protein 2 elks erc	♂	N.S.	N.S.	0.298019338276566	239.314263388556	59.7735200135356	157.791574575031
Smp_025830	XLOC_001355	PREDICTED: ADP-ribosyl cyclase 1	♂	N.S.	N.S.	0.139994462405136	6979.32285901377	406.740526747035	4175.01209227606
N.A.	XLOC_000349	protein phosphatase methylesterase 1 (s33 family)	♂	N.S.	N.S.	0.0937514264505349	2681.2266741065	319.217421645318	1656.22133681106
N.A.	XLOC_001491	protein phosphatase methylesterase 1 (s33 family)	♂	N.S.	N.S.	0	10.2617555997362	0	14.49009846805

## Sheet: Sheet11 - CellMetabolism
CELL METABOLISM (320 hits)
Gene ID (v5.2)	CuffLinks IDs	Predictive product	Sex of bias	Fold Change			Expression level average (fpkm)			Specific remarks
				Cercariae	Schistosomula S#2	Adults	Cercariae	Schistosomula S#2	Adults
OXYDOREDUCTION & RESPONSE TO OXYDATIVE STRESS				N.S.	N.S.	N.S.
Smp_120070	XLOC_024337	retinol dehydrogenase 11	♀	83.6789319624093	N.S.	N.S.	156.843080903768	6.39210027668796	2.76679968034588
Smp_171960	XLOC_025477	dehydrogenase reductase sdr family member 1	Switch	54.2844268038824	N.S.	0.32930273871816	25263.0853151187	282.443789159413	620.415598981232
Smp_162360	XLOC_030336	myoglobin 1	♀	21.1853452214926	N.S.	N.S.	38.7160091434658	10.6135621785552	13.327766972416
Smp_062900	XLOC_014727	tryparedoxin peroxidase	♀	20.1259577095382	N.S.	N.S.	80.0435730361979	29.5468786955362	12.6763556494396
Smp_088720	XLOC_009219	nadh:ubiquinone oxidoreductase complex i intermediate-associated protein -containing protein	♀	19.2553137158826	N.S.	N.S.	126.512840214658	2.0375180001055	4.67250753983007
Smp_212250	XLOC_030611	sepiapterin reductase	♀	14.3849748692427	N.S.	N.S.	690.289142381224	82.3548730926743	101.265926801227
Smp_171270	XLOC_008662	molybdopterin cofactor synthesis protein a	♀	7.66365842026338	N.S.	N.S.	659.097366141315	90.6211536496854	165.077033595262
Smp_160810	XLOC_013555	amine oxidase	♀	4.29269588638646	N.S.	N.S.	3722.19578084818	1763.5947469493	1981.60604566709
Smp_058690	XLOC_028049	glutathione peroxidase	♀	2.77242847197207	N.S.	N.S.	11893.1720154184	9750.92287332823	4094.07736408938
Smp_139680	XLOC_024341	retinol dehydrogenase 11	♀	N.S.	N.S.	Inf	2.34158265590649	2.3568082137334	8.99620780271121
Smp_038870	XLOC_006695	nadh-ubiquinone oxidoreductase	♂	0.352280888325519	N.S.	N.S.	4865.29606176418	4252.73445206202	6767.76619542927
Smp_044970	XLOC_024140	2-oxoglutarate dehydrogenase	♂	0.340905613971014	0.456182655566304	N.S.	18313.6182536821	14576.1157341609	26351.4615023316
Smp_018760	XLOC_031233	neutral alpha-glucosidase ab isoform x1	♂	0.309950325038453	N.S.	N.S.	8679.7957700898	16713.8023110588	13589.362781399
Smp_053230	XLOC_028587	cytochrome b5 reductase 1	♂	0.308881670936426	N.S.	N.S.	16346.907313649	9761.2869271887	17622.0351926679
Smp_128360	XLOC_025651	nadp-dependent malic enzyme-like	♂	0.295142298818948	N.S.	N.S.	3535.85300600899	3947.79083917114	5339.05485169873
Smp_094880	XLOC_000988	starch branching enzyme ii	♂	0.28785229762228	N.S.	N.S.	6529.42812050285	5841.98185333805	8567.23443548893
Smp_000660	XLOC_029506	ornithine aminotransferase	♂	0.279156178045039	N.S.	0.421565870270311	24303.2387812281	4961.38299475623	26406.9197222706
Smp_150700	XLOC_028580	aldo-keto reductase family member b4 (aldose reductase)	♂	0.273316901206949	N.S.	N.S.	523.330669170896	574.102187316353	582.802457593913
Smp_106080	XLOC_033858	nadh dehydrogenase 1 alpha subcomplex 9	♂	0.257466622615965	0.28063127446134	N.S.	3894.93168431063	7641.48802627951	5238.14115576395
Smp_133530.2	XLOC_025254	ww domain-containing oxidoreductase	♂	0.247490224701798	0.446829480057243	N.S.	2485.03127447651	2385.37904417647	2713.44446228885
Smp_147400	XLOC_026059	p53 regulated pa26 nuclear protein sestrin	♂	0.229318372572339	0.438166067281339	0.378929891760582	4226.90781807013	4400.22738837312	6081.4214799656
Smp_068250	XLOC_025856	protoporphyrinogen oxidase	♂	0.228889263862875	0.302516679788486	0.516659842561055	4227.87470611338	5794.68686932975	5480.67064680586
Smp_078400	XLOC_025546	n-acetylgalactosamine kinase-like	♂	0.226490014170156	0.314476469112142	0.413315522272705	2081.95315870844	1439.52420775188	2028.80560492723
Smp_196110	XLOC_023343	ferric-chelate reductase 1	♂	0.221236491207998	0.446820052841298	N.S.	4639.96257226341	7182.52213002378	8641.27193347048
Smp_118780	XLOC_034305	2-aminoethanethiol dioxygenase-like	♂	0.210384721665965	N.S.	N.S.	604.631455773332	1368.46155985415	1234.13390178537
Smp_065060	XLOC_010201	aldehyde dehydrogenase	♂	0.206762165267111	0.443573490842341	N.S.	1273.0415007621	3546.15382358198	2254.84075807737
Smp_155420	XLOC_026155	thioredoxin domain-containing protein 11	♂	0.191375394604458	N.S.	0.459134012779363	1580.46458880512	1351.67781381154	2114.83415944819
N.A.	XLOC_008415	acyl- dehydrogenase	♂	0.191316183200082	N.S.	N.S.	314.598579006075	508.468423794687	372.452109929825
N.A.	XLOC_006574	nadh dehydrogenase fe-s protein 2	♂	0.183048241781495	0.292418549363318	N.S.	1586.0761368661	2212.35273259707	2078.49249972724
Smp_125500	XLOC_010474	prenylcysteine oxidase-like	♂	0.177228838521781	N.S.	N.S.	1322.93433795354	1818.222350474	1838.82682369881
Smp_123440	XLOC_011888	fad oxidoreductase	♂	0.174975519444388	N.S.	N.S.	5785.53625298759	4865.36712388393	8400.55770831998
Smp_128860	XLOC_004111	lysyl oxidase-like 2	♂	0.161131363616865	N.S.	N.S.	578.979223665892	460.802567969328	1256.09497649976
Smp_144840	XLOC_021169	thioredoxin domain-containing protein 4 precursor	♂	0.159929336140952	N.S.	N.S.	2213.60185753718	2826.01387292192	3588.14361699389
Smp_158680	XLOC_030266	molybdopterin biosynthesis protein	♂	0.159516882728713	0.3621639916743	N.S.	460.651142139318	1561.45529709444	809.475838456526
Smp_210440	XLOC_004565	aldh9a1a protein	♂	0.137359507946708	N.S.	N.S.	2275.9971157829	1451.72741553276	2827.84335680175
N.A.	XLOC_013571	monothiol glutaredoxin-s6	♂	0.137354579226901	N.S.	N.S.	83.6332775363615	81.3093302563991	189.57143854393
Smp_000190	XLOC_013937	sdr1 protein	♂	0.113302965083294	N.S.	N.S.	2552.45300288712	1887.10737863648	3223.21410693612
Smp_022960	XLOC_021206	aldehyde dehydrogenase	♂	0.107217105683882	N.S.	N.S.	2050.50183129937	3598.56808983613	3139.42696584769
Smp_194800	XLOC_023872	spry domain containing protein	♂	0.0876550296635197	N.S.	N.S.	1752.15968630143	1433.54920924232	3359.50229920287
Smp_001410	XLOC_009052	glyoxalase i	♂	0.0818338260441641	N.S.	0.495440655821474	3665.7838179877	2172.01453355193	3495.43169372847
Smp_198690	XLOC_027722	hmg coenzyme asynthase	♂	0.062274402510536	0.407984783619804	0.484796589664175	1300.66430748328	1465.52900732737	1579.90620764011
Smp_081430	XLOC_007239	retinol dehydrogenase 11	♂	0.054015718128408	N.S.	N.S.	3524.95457674819	5505.37856549186	6007.63184993072
Smp_198560	XLOC_027471	neutral sphingomyelinase	♂	0.0445445899358265	N.S.	N.S.	257.5274641773	379.584776686009	453.82277669965
Smp_123660	XLOC_019012	TPO domain containing protein	♂	0.043130854914629	N.S.	0.355566672135284	2539.75184725683	1053.13308063546	4218.5723159258	100*
Smp_173480	XLOC_005642	n -(beta-n-acetylglucosaminyl)-l-asparaginase-like	♂	0.0153322018850554	N.S.	0.490035430309226	2720.24206194507	566.27059012122	3610.78094174705
Smp_159060	XLOC_001762	lysyl oxidase-like	♂	0.0099654873315641	N.S.	N.S.	395.401348709114	171.270784962005	996.608552152385
Smp_058660	XLOC_028050	molybdenum cofactor synthesis protein 2 large subunit	♂	0.00579007476441062	N.S.	0.410709258984206	1057.32533658207	254.616417487235	1030.40458352442
Smp_017610	XLOC_011418	Amiloride-sensitive amine oxidase	♂	0.0011324621631356	N.S.	0.0157036954160447	1741.00324115926	36.2680193245864	1748.03606144439	100*
Smp_050390	XLOC_017738	Retinal dehydrogenase	♂	0.000282028834452259	0.451217018011356	0.260379483035485	52722.5805838865	13250.7444781105	60141.2715358526	100*
Smp_018020	XLOC_023522	nadh dehydrogenase	♂	N.S.	0.477050314237452	N.S.	4593.31550469124	5888.00205348571	5384.21079686703
Smp_026310	XLOC_013147	zinc binding dehydrogenase	♂	N.S.	0.469006588565466	N.S.	2487.31032494182	3365.45203747962	2257.69570922286
Smp_033540	XLOC_025352	carbonyl reductase 1	♂	N.S.	0.461376909208348	N.S.	7079.76100551606	8791.19332766963	7665.46446019847
Smp_166580	XLOC_029409	ferredoxin ferredoxin--nadp reductase-related	♂	N.S.	0.456195762923218	0.476588561949603	1705.51525794485	1357.96014275962	1693.0540698791
Smp_092490	XLOC_003119	nadh dehydrogenase fe-s protein 7	♂	N.S.	0.452472158104345	N.S.	5964.67848068618	5575.58087978659	5906.06230327864
Smp_176200.2	XLOC_031493	superoxide dismutase soluble	♂	N.S.	0.444162706682257	N.S.	10147.1847346344	14645.02744	12561.174988206
Smp_048830	XLOC_008100	nadh dehydrogenase	♂	N.S.	0.439399101371517	N.S.	3345.2279014096	6209.63547772469	4063.87041796591
Smp_006550	XLOC_001159	thioredoxin-like 2	♂	N.S.	0.435070813557241	N.S.	5859.47915371621	7881.26534122563	4453.65519961321
Smp_070780	XLOC_012987	udp-glucose 4-epimerase	♂	N.S.	0.433800512431653	0.4412680071124	6481.59110148276	1723.6447409189	5687.05696211193
Smp_043030	XLOC_015266	hexokinase a	♂	N.S.	0.428261070154414	0.516251703032901	19197.5908359231	11407.3363030803	16594.3930889567
Smp_196160	XLOC_021179	isocitrate dehydrogenase (nad+)	♂	N.S.	0.411084941661618	N.S.	4976.22141040923	4854.97285491186	4556.30907424351
Smp_082940	XLOC_029843	nadh dehydrogenase	♂	N.S.	0.408726331099617	N.S.	10074.6838693157	7129.62213239531	6933.30994983772
Smp_010400	XLOC_020902	reactive oxygen species modulator 1	♂	N.S.	0.408557977056484	N.S.	1513.34376418578	2996.9322259183	1746.3157850424
Smp_010710	XLOC_020957	nadh dehydrogenase flavoprotein 1	♂	N.S.	0.400697827121757	N.S.	7257.12409811974	8142.07126123479	8685.53456126517
Smp_071840	XLOC_008674	6-phosphogluconate dehydrogenase	♂	N.S.	0.371148966657357	N.S.	5931.36986259776	5853.4614217411	5278.45063792591
Smp_035270.2	XLOC_000655	cytosolic malate dehydrogenase	♂	N.S.	0.348797620701967	N.S.	12342.6261547863	12658.7806865717	11150.7810610912
Smp_022090	XLOC_009347	ribose-phosphate pyrophosphokinase 1	♂	N.S.	0.347449470224068	N.S.	4073.45301581986	6053.80730595727	4039.33667367338
N.A.	XLOC_025478	short chain dehydrogenase	♂	N.S.	0.322440330930534	0.354053416550478	5194.95944460744	2848.76961278614	3680.51093011137
Smp_199860	XLOC_034326	6-phosphogluconate dehydrogenase	♂	N.S.	0.309911897939869	N.S.	1208.75437494955	1188.38097987344	1249.86339101706
Smp_092570	XLOC_029776	nadh dehydrogenase	♂	N.S.	0.302376166425266	0.526301659496177	7568.99424972613	8100.44751100831	6760.56950665506
Smp_211270	XLOC_031272	d-3-phosphoglycerate dehydrogenase	♂	N.S.	0.285807576269781	N.S.	2168.88225198701	6538.41374036052	2876.65250111073
Smp_019730.2	XLOC_031941	nadh:ubiquinone oxidoreductase subunit -containing protein	♂	N.S.	0.281243611941612	0.389014501810254	12642.1566780221	8179.66243635783	10222.0835457266
Smp_042160.2	XLOC_015737	aldolase	♂	N.S.	0.279881254387009	0.337858767906665	312826.611471471	50366.7394720671	292573.274976866
Smp_044440	XLOC_022541	Alcohol dehydrogenase class 3	♂	N.S.	0.236968417596767	0.465675119600308	3848.42679919282	5234.03022045645	3451.7220105894	100*
Smp_171900	XLOC_025484	nadh dehydrogenase	♂	N.S.	0.22783480712662	0.435744171441202	6669.87740287472	9675.95461211292	6324.33242345166
Smp_047060	XLOC_026053	nadh dehydrogenase 1 beta subcomplex 9	♂	N.S.	0.223224609198214	0.501859696317352	4959.07205858841	4840.29145003624	3764.16098975164
Smp_133510	XLOC_022378	aldehyde dehydrogenase	♂	N.S.	N.S.	0.521178908751548	1996.04807263723	1374.38946483402	2069.75620745353
Smp_164050	XLOC_019877	o-phosphoseryl-trna selenium transferase	♂	N.S.	N.S.	0.508656279538042	1129.17374466899	497.650324122389	1382.75876834973
Smp_064750	XLOC_026595	pantothenate kinase	♂	N.S.	N.S.	0.353459338841531	4006.47127263775	1829.75407040812	4153.72899878568
N.A.	XLOC_026248	isocitrate dehydrogenase (nad+)	♂	N.S.	N.S.	0.23095329791348	32.0859880386425	7.4936944070166	31.1826652977265
GENERAL METABOLISM				#N/A	#N/A	#N/A
Smp_170690	XLOC_016108	proline oxidase	♀	29.6325345931295	N.S.	3.21022937286922	3055.79849648071	1455.81633475257	357.087669889325
Smp_179260	XLOC_020005	alpha-galactosidase alpha-n-acetylgalactosamini da se	♀	27.7169269041468	N.S.	N.S.	26.5948754038025	6.49381170148302	10.7937904318681
Smp_149870	XLOC_014899	Cat eye syndrome critical region protein 5	♀	23.5043077988691	0.0336907517989941	0.135776438363827	274.022300003526	14.7190724215098	14.67023964642	100*
Smp_179110	XLOC_022095	purine nucleoside phosphorylase	♀	21.1913414290367	N.S.	N.S.	1350.37079205637	60.1444964220447	74.0315887116392
Smp_125890	XLOC_002219	deoxyribodipyrimidine photo-lyase-like	♀	20.6972138962097	N.S.	3.19980646901895	2284.21717505694	334.765422599213	384.643076884292
Smp_149860	XLOC_014901	cat eye syndrome critical region protein 5	♀	19.5246403401438	N.S.	N.S.	290.47453509377	13.1673975832754	13.1037472525599
Smp_130860	XLOC_017117	phenylalanine decarboxylase	♀	14.7791926577718	N.S.	10.3634993272014	27.5365274290603	32.3654218719428	14.649039479723
Smp_005880	XLOC_004974	phosphoenolpyruvate carboxykinase	♀	11.2507653575732	0.266960948174059	N.S.	23079.0745453097	3793.56998488687	4090.30121196548
Smp_030500	XLOC_033122	glycerol-3-phosphate dehydrogenase 1	♀	9.00567603006999	0.36839794850608	N.S.	63588.9096614383	10055.4952684221	12243.900739541
Smp_212280	XLOC_032442	malate dehydrogenase 1b	♀	7.11791200835195	N.S.	N.S.	4748.94304185461	707.330065097147	1507.17540319758
Smp_125150	XLOC_001886	glycoprotein 2-beta-d-xylosyltransferase	♀	6.5454208468261	N.S.	N.S.	37.8298576160745	0.159911338667284	3.61430991657081
Smp_129610	XLOC_000242	malate dehydrogenase	♀	6.29901540040906	0.346917915866595	N.S.	736.117726000028	335.573523640814	137.122012933452
N.A.	XLOC_020728	acyl- :glycerol-3-phosphate acyltransferase	♀	6.15999550284948	N.S.	N.S.	86.8064512924952	14.5019918627872	20.0761820895167
Smp_148770	XLOC_017830	ribose-5-phosphate isomerase	♀	6.15856604128274	N.S.	N.S.	2420.14787219963	555.058191222286	612.871113386606
Smp_204770	XLOC_030436	citrate synthase	♀	6.03000319059648	N.S.	N.S.	85221.573141536	14501.2000060616	21654.134209667
Smp_103670	XLOC_034521	glycolipid transfer	♀	5.31477668163193	N.S.	N.S.	199.66524484989	34.9354121054341	89.5842273948003
N.A.	XLOC_002067	phospholipase d	♀	5.21068528735429	7.81174329082238	N.S.	75.3440560477372	34.4827553320766	47.6159972943631
Smp_165750	XLOC_021436	cysteine dioxygenase type 1	♀	5.0115885224685	N.S.	N.S.	810.637843660024	64.9934905423197	177.369201228441
N.A.	XLOC_026421	diphthine synthase	♀	4.07143226005558	N.S.	1.91726233671474	3649.19672535473	1050.86445492121	1477.11404703582
Smp_002510	XLOC_013237	pyruvate dehydrogenase	♀	3.61956801091619	0.453660643073004	N.S.	6074.92312461179	4346.05414260922	2774.05364842566
Smp_096020.2	XLOC_031818	adenosylhomocysteinase 3	♀	3.55724706170831	N.S.	N.S.	20454.4400754375	6275.21796295854	9838.70549412441
N.A.	XLOC_020543	aconitate mitochondrial isoform x2	♀	3.28707419616329	N.S.	N.S.	1637.67214411006	528.214643043098	693.140625862709
Smp_199470	XLOC_033749	glycerol-3-phosphate acyltransferase 3-like	♀	3.16494465762302	N.S.	N.S.	3100.68075015726	1212.15707862316	1484.09404640826
N.A.	XLOC_002932	glycerol-3-phosphate dehydrogenase	♀	3.07773626085173	N.S.	N.S.	3053.10608828588	647.818764806936	1609.51505941105
Smp_090520	XLOC_022088	purine nucleoside phosphorylase	♀	3.03287972731474	N.S.	11.5278092413005	1533.3476634552	6840.0719470104	3326.98447973124
Smp_051550	XLOC_032979	pyridoxamine 5 -phosphate oxidase	♀	2.84575683958332	N.S.	N.S.	4685.28626220891	1195.50988801218	1929.3661283647
Smp_127280	XLOC_031917	diacylglycerol o-acyltransferase 1	♀	2.80163010639034	N.S.	0.383594994877361	3931.13661113343	391.387732180772	1222.03800087389
Smp_121990	XLOC_005927	glycerol-3-phosphate dehydrogenase	♀	2.74219607725844	N.S.	N.S.	16823.2624316777	4263.08034067936	9257.16421009016
Smp_015050	XLOC_012484	ethanolamine kinase 1	♀	2.53842884624686	N.S.	N.S.	4998.22798795558	869.172102759026	1644.23431101356
N.A.	XLOC_014188	phospholipase c beta	♀	N.S.	N.S.	17.2410187341957	1.37836430513023	0.688297815749801	28.3531401382379
N.A.	XLOC_027620	acyl- :glycerol-3-phosphate acyltransferase	♀	N.S.	N.S.	12.9370653606463	11.4412061329604	5.63838595381512	10.7800219714469
Smp_148820	XLOC_017682	hypoxanthine-guanine phosphoribosyltransferase	♀	N.S.	N.S.	5.87823401437865	20.9919556588431	206.271232978091	103.253809634851
Smp_146640	XLOC_028492	glycosyl transferase family 8	♀	N.S.	N.S.	2.64781676371686	93.2095109609209	48.5777230328004	150.847776150555
Smp_145060	XLOC_015746	acyl- :glycerol-3-phosphate acyltransferase	♀	N.S.	N.S.	2.31669207178044	197.061067272051	197.138810254237	418.742614135055
Smp_198020	XLOC_017492	catechol-o-methyltransferase domain-containing protein 1	♀	N.S.	N.S.	2.11439104625641	527.189262258419	1006.25921684583	582.997959602667
Smp_007640	XLOC_022261	glycogen debranching enzyme	♂	0.360365506148883	0.328888851735621	N.S.	10337.3945525363	6674.91167647237	15481.4095826313
Smp_065610	XLOC_005850	pyruvate kinase	♂	0.360095982574726	0.285662015929502	0.470347325094325	57819.2574056443	47091.6038061156	70898.1889506904	qPCR
Smp_093820	XLOC_029973	Glutamate dehydrogenase	♂	0.318459221601235	0.227810033125422	N.S.	5971.79634026343	12515.4478098497	7321.45075014897	100*
Smp_210600	XLOC_014013	aspartyl aminopeptidase (m18 family)	♂	0.31077446631259	N.S.	N.S.	1817.21462344291	1843.60654879281	3305.85860362694
Smp_039750	XLOC_024381	glycogen phosphorylase	♂	0.301777979059637	N.S.	N.S.	705.392292250057	685.988069906062	933.804163828949
Smp_031190	XLOC_022173	phospholipase a	♂	0.300182212296664	0.416030386883058	N.S.	681.642064503647	1534.6355506964	849.09848335582
Smp_147650	XLOC_007830	formate-tetrahydrofolate ligase	♂	0.284899915117899	N.S.	N.S.	1927.78943550254	1879.03803084893	2753.18700967294
Smp_059790.2	XLOC_002474	transketolase	♂	0.283059638205121	0.415215100652952	N.S.	15581.6700293711	22415.7870458205	25235.9729740086
Smp_060820	XLOC_007939	succinyl- synthetase beta chain	♂	0.279126972624124	N.S.	N.S.	2458.69401890307	3407.66264198804	3564.141449455
N.A.	XLOC_023637	low quality protein: adenylate kinase domain-containing protein 1	♂	0.272595734266712	N.S.	N.S.	61.3846660001017	40.5654892531793	128.748813348622
Smp_168730	XLOC_020246	Carbonic anhydrase	♂	0.264349438731656	N.S.	0.143898275317467	4467.16872707827	267.326365861354	3303.71379597396	100*
Smp_028440	XLOC_027743	adenosylhomocysteinase	♂	0.256374986692953	0.195776063554979	0.457196044440293	3596.58000143695	9402.00886058816	4199.26178936643	100*
Smp_041450	XLOC_021767	asparaginyl-trna synthetase	♂	0.248414387370828	0.43435072537903	N.S.	5770.29561914939	11781.4228724804	8025.89325970403
Smp_081420	XLOC_007198	biotin-protein ligase	♂	0.237909695831545	N.S.	N.S.	51.0423482308364	37.7685723355908	61.6960121843723
Smp_172730	XLOC_025257	fatty aldehyde dehydrogenase	♂	0.235042532885125	0.281162355472209	0.4760338012516	4841.94820136347	4952.33275095789	4560.73282490462
Smp_018260	XLOC_011308	glycogen synthase	♂	0.232367566156127	0.411953033736477	N.S.	6174.41166296915	3984.17051161528	9103.08680407585
Smp_143430	XLOC_031698	alpha-mannosidase 2	♂	0.232205326006314	N.S.	N.S.	1239.79696574387	1750.92452985336	1919.64901849811
Smp_052810	XLOC_001294	glucose-6-phosphate 1-dehydrogenase	♂	0.218316289387928	N.S.	N.S.	5863.73739889411	3305.57881183507	6062.6315318069
Smp_129450	XLOC_011534	glucose-6-phosphatase	♂	0.214464318649421	N.S.	N.S.	1714.0513325856	1546.19879308207	2207.96052907153
Smp_059880	XLOC_025808	galactose-1-phosphate uridylyltransferase-like	♂	0.187189956807214	0.365201436538358	0.360097984296351	3226.36540738266	3630.72257209461	3666.37112337311
Smp_133540	XLOC_025249	asparagine synthetase domain-containing protein 1	♂	0.167730189557213	N.S.	N.S.	367.650347862639	662.426139462041	620.531165909212
Smp_168460	XLOC_007078	core 1 udp-galactose:n-acetylgalactosamine-alpha-r beta -	♂	0.161672943661894	N.S.	N.S.	896.952046568208	502.358392532045	1460.44419477539
Smp_149160	XLOC_015850	phosphatidate phosphatase lpin3	♂	0.148779038212065	N.S.	N.S.	2617.15733553274	1592.27076994482	4640.21504499947
Smp_038960	XLOC_023968	l-lactate dehydrogenase	♂	0.148201599161246	N.S.	N.S.	8904.44793994929	14289.1009243749	13572.0005971313
Smp_127370	XLOC_006563	glycosyltransferase 14 family member	♂	0.14410176148272	N.S.	N.S.	1085.21959941144	309.081704378018	1116.60389703291
Smp_042020	XLOC_015711	atp-diphosphohydrolase 1	♂	0.143143235339271	N.S.	0.432215223373983	6643.56854879406	2218.17338565481	9791.01758174139
Smp_008490	XLOC_004622	glycogenin glucosyltransferase	♂	0.137317436794689	0.368036356881178	0.326550829078744	6951.47631267971	5699.4121643903	9143.82632149537
Smp_070710	XLOC_011595	farnesyl diphosphate synthase	♂	0.133284498458163	N.S.	N.S.	1015.09252477061	1339.94694036228	1530.91991787167
Smp_030000	XLOC_012112	leucyl aminopeptidase	♂	0.129731717025463	N.S.	N.S.	9621.06690685305	8106.20222190726	13380.9657408708	qPCR
N.A.	XLOC_017486	catechol o-methyltransferase domain-containing protein 1	♂	0.121426462135976	N.S.	N.S.	69.036936507011	57.4692378317264	86.068914609599
Smp_012560	XLOC_017491	catechol o-methyltransferase domain-containing protein 1	♂	0.117598635543418	N.S.	N.S.	48.9303991824241	37.5576349222921	66.7730377760495
Smp_169570	XLOC_021993	PREDICTED: Glycerol-3-phosphate dehydrogenase [NAD+]	♂	0.113662972352767	0.210755915173588	0.0377789259583967	2615.27813347252	250.786352653331	1930.93295542257	100*
Smp_103560	XLOC_017848	hypoxanthine-guanine phosphoribosyltransferase	♂	0.11356687916008	N.S.	0.352152008619921	2118.55728127569	1651.03293330463	3007.0989739292
Smp_028490	XLOC_027693	1-acyl-sn-glycerol-3-phosphate acyltransferase epsilon	♂	0.102003340001624	N.S.	0.344094545342602	787.261679375429	269.110382175709	852.76255647154
Smp_175090.3	XLOC_022547	Long-chain-fatty-acid ligase	♂	0.099131569571679	0.350299270165611	0.269651134906789	11074.8000092801	4938.89861713431	12516.9178502003	qPCR
Smp_043390	XLOC_025572	Probable beta-d-xylosidase	♂	0.0838934254337614	N.S.	0.212683168329334	7085.1154274649	758.663298088623	6191.66410225106	100*
Smp_133600	XLOC_008995	utp-glucose-1-phosphate uridylyltransferase 2 (udp-glucose pyrophosphorylase 2)	♂	0.0826922173262729	0.439399843685495	N.S.	6247.15060491141	3307.58893639454	8774.24029901905
Smp_204160	XLOC_025846	aspartate--ammonia ligase	♂	0.0817689449060401	0.376160667805896	N.S.	683.263550949424	2690.68524609153	1268.72837164558
N.A.	XLOC_028895	glucosamine-6-phosphate n-acetyltransferase	♂	0.081611187977896	N.S.	N.S.	577.220419120593	235.039591076175	521.798309300778
Smp_058670	XLOC_027861	glycosyltransferase 25 family member-like	♂	0.081072816169024	N.S.	N.S.	251.487917763919	548.374147997737	533.775372521986
Smp_053900	XLOC_016139	beta-hexosaminidase subunit beta	♂	0.0800748649883744	N.S.	N.S.	13329.7217306372	2614.54651768467	16398.7645327731
Smp_028190	XLOC_027711	methylthioadenosine phosphorylase	♂	0.0792080498751279	0.447300528747718	N.S.	1018.78052875149	1423.7225667775	1298.75346079496
Smp_028670	XLOC_024933	carbonic anhydrase ii (carbonate dehydratase ii)	♂	0.0582753880252082	0.415467241364524	0.392178109524144	4375.06479751712	1457.28223303237	5940.19819132848
Smp_049150	XLOC_008165	aspartate aminotransferase	♂	0.0521480914000098	N.S.	N.S.	2104.11724098565	2375.00914268031	5062.85953469064
Smp_187360	XLOC_001624	Glucosaminyl (N-acetyl) transferase	♂	0.0490218999055725	N.S.	0.184495760386786	400.38990800562	54.3367250249417	379.332192900584	100*
Smp_163610	XLOC_028219	Glutathione S-transferase	♂	0.0417357425237312	N.S.	0.151286470377	11449.9801934377	941.441531164716	7914.45292655014	100*
Smp_146250	XLOC_028968	Tissue alpha-L-fucosidase	♂	0.0397132145165097	N.S.	0.397157972102379	2089.95114207277	369.747009497176	2733.86927191712	100*
N.A.	XLOC_009177	trehalose-6-phosphate hydrolase	♂	0.0355720736927377	N.S.	N.S.	63.6172481245284	39.9578054276777	114.72444922315
Smp_126120	XLOC_001423	lama-like protein 2 precursor	♂	0.0286336836665093	N.S.	0.196503926102321	3944.0183093355	597.741304880346	4035.48503098916
Smp_139850	XLOC_009179	trehalose-6-phosphate hydrolase	♂	0.0261935209351895	N.S.	N.S.	37.4819845942842	20.1448812849797	77.3442590244815
Smp_154680	XLOC_004888	Glycosyltransferase 14 family member	♂	0.0194875706292214	N.S.	0.221491062999397	254.156195552255	54.4027055690358	320.280271669187	100*
Smp_089290	XLOC_018935	alpha-galactosidase alpha-n-acetylgalactosaminidase	♂	0.0163319848746483	N.S.	N.S.	2900.5101106894	1111.21154262316	5288.79325668757
Smp_007760	XLOC_025114	Alanine aminotransferase	♂	0.0108728757865764	0.356575759206755	0.332786058700376	2584.44408203669	399.612233540457	3916.22710818174	100*
Smp_011990	XLOC_022825	beta-galactosidase-1-like protein	♂	0.0103866966097694	N.S.	N.S.	2628.41960701556	3047.08686224853	5033.95007233763
Smp_135230	XLOC_026649	Aromatic-L-amino-acid decarboxylase	♂	0.00841456512802932	N.S.	0.010124381941842	677.704456494855	42.37654080123	838.77195389982	100*
Smp_170430	XLOC_007484	d-amino acid	♂	0.00602515574644369	0.284566284126045	0.278090338377393	250.514785583673	74.3804409021669	240.280249462592
Smp_144220	XLOC_002987	glycine amidinotransferase	♂	0.00562811240374996	0.311213282680525	N.S.	1816.60138959521	1636.58200434022	3748.79038394529
Smp_033040	XLOC_022629	L lactate dehydrogenase	♂	0.00359392346853263	0.136720339855683	0.38608895129691	7481.96466295882	7783.53649926669	9022.76619754086	100*
Smp_137150	XLOC_015021	Beta-mannosidase	♂	0.0031441152264598	N.S.	0.303860395825409	236.372192854151	18.4754561579568	296.0526361064	100*
Smp_052470	XLOC_016131	caffeoyl- o-methyltransferase	♂	0.00151131058395755	N.S.	N.S.	155.410857589703	31.8619766885547	204.031072063334
Smp_102070	XLOC_018319	glutathione s-transferase m1	♂	N.S.	0.474564306020718	N.S.	18343.0041338069	20303.1463610775	15360.7296576848
N.A.	XLOC_002636	abhydrolase domain-containing protein 13-like	♂	N.S.	0.465941499726347	N.S.	2164.32842175031	3251.84433989064	2938.00550874771
Smp_073600	XLOC_003616	platelet-activating factor acetylhydrolase ib subunit gamma-like	♂	N.S.	0.445150674028931	N.S.	4295.77441095518	5169.88052856685	4607.82752362868
Smp_038950	XLOC_026838	l-lactate dehydrogenase	♂	N.S.	0.441351732666211	N.S.	28445.6465695228	24314.8130412171	31771.2265381288
Smp_004780	XLOC_008825	immunophilin	♂	N.S.	0.431715193983006	N.S.	20211.6526165018	58413.7664673463	38511.6787968997
Smp_004220	XLOC_010130	fatty-acid amide hydrolase 1	♂	N.S.	0.426562208009509	N.S.	5298.29670974345	6687.29150870694	6807.33982268262
Smp_066410	XLOC_030035	pyruvate dehydrogenase protein x component-like	♂	N.S.	0.412716710224089	N.S.	9716.67452549686	6317.78969291843	8655.77318282371
Smp_053510	XLOC_016810	aspartyl-trna synthetase	♂	N.S.	0.388673927900863	N.S.	4641.74176180416	7104.50258487868	3908.84865819499
Smp_015860	XLOC_025720	phosphopantetheine- -containing protein	♂	N.S.	0.38695548476782	N.S.	2332.93129396937	2844.52096218009	2994.80667512758
Smp_002080	XLOC_018991	methionine adenosyltransferase alpha	♂	N.S.	0.386861407488793	N.S.	3191.98318451156	10768.2143202984	5374.72118851885
Smp_046740	XLOC_008526	dihydrolipoamide dehydrogenase	♂	N.S.	0.38040156499228	N.S.	6125.50545418673	9890.95578161642	7895.44949769294
Smp_052060	XLOC_016300	succinyl- ligase	♂	N.S.	0.370889772941682	N.S.	8504.41809332835	7129.67829027073	7446.69424301849
Smp_168310	XLOC_024883	glycerol-3-phosphate dehydrogenase	♂	N.S.	0.360731792743722	0.353066020604477	1906.32852049852	1187.99094647841	2003.75072478699
Smp_122050	XLOC_005944	lag1 longevity assurance homolog 1	♂	N.S.	0.360365958574447	N.S.	1078.09328927236	1717.8101852389	1125.72893510731
Smp_078730	XLOC_012042	dihydroorotate dehydrogenase	♂	N.S.	0.347698919114397	N.S.	553.461340568464	886.777825322752	517.917254029412
Smp_104330	XLOC_010149	dihydrolipoyllysine-residue succinyltransferase component of 2-oxoglutarate dehydrogenase mitochondrial-like	♂	N.S.	0.343531425775089	N.S.	3301.77193256775	5205.33172235814	4943.32603840987
Smp_096760	XLOC_015539	phosphoglycerate mutase	♂	N.S.	0.341985654934794	N.S.	22785.1536895368	20964.0049229878	26086.1212920696
Smp_083650	XLOC_004929	cystathionine gamma-lyase	♂	N.S.	0.338449562011949	N.S.	384.177103800445	282.694900328189	247.799649182776
Smp_018890	XLOC_012362	phosphoglycerate kinase 1	♂	N.S.	0.336907151630141	N.S.	36088.6892651293	33771.0162362966	40993.2018871629
Smp_145380	XLOC_016695	beta-ketoacyl -containing protein	♂	N.S.	0.335143303914206	N.S.	311.101521801219	103.476324160758	223.341970506248
Smp_165780	XLOC_025880	glycine cleavage system h protein	♂	N.S.	0.334837603315382	0.500416532843123	8997.90252061396	6628.40756466918	8245.39770709824
Smp_054160	XLOC_031085	glutathione s-transferase	♂	N.S.	0.326115133705307	0.274119481107226	111265.895036617	44446.2014315116	104394.667542905
N.A.	XLOC_017820	hypoxanthine-guanine phosphoribosyltransferase	♂	N.S.	0.317606202090463	N.S.	740.581522498403	342.846911631686	677.640799978162
Smp_022400	XLOC_024997	glucose-6-phosphate isomerase	♂	N.S.	0.317426016235442	0.455675908023487	23029.3827138787	9659.14010987155	22337.7966851603
Smp_172660	XLOC_029983	diphosphomevalonate decarboxylase	♂	N.S.	0.298869556596889	N.S.	2453.1031018128	3469.59799517899	2345.10421293433
Smp_210300	XLOC_010658	phospholipase ddhd1	♂	N.S.	0.282727981929253	N.S.	13164.2990404893	35754.7673597631	16727.7747795613
N.A.	XLOC_000833	quinolinate phosphoribosyltransferase	♂	N.S.	0.280855163975218	N.S.	7017.61006099364	14648.3159006313	7200.21649447741
Smp_158510	XLOC_004922	2-acylglycerol o-acyltransferase 1	♂	N.S.	0.268582814503259	N.S.	1269.44524970263	186.488072153148	1078.86437253545
Smp_079920	XLOC_025837	Pyruvate dehydrogenase	♂	N.S.	0.223793464316315	0.339153973252794	14852.558655735	9935.15095807048	12424.7044876346	100* & qPCR
Smp_043670	XLOC_018098	phosphohexokinase	♂	N.S.	N.S.	0.487623071119037	26036.7859990067	5843.79473358962	29955.8317006599
N.A.	XLOC_021998	glycerol-3-phosphate dehydrogenase	♂	N.S.	N.S.	0.471091879202088	2706.19188935075	1751.62066999168	2368.78322770824
Smp_132850.2	XLOC_026017	1-acylglycerophosphocholine o-acyltransferase 1-like	♂	N.S.	N.S.	0.465815995229807	2814.83767930353	2827.4801024041	3556.68645268325
Smp_098710	XLOC_032486	quiescin q6-related sulfhydryl oxidase	♂	N.S.	N.S.	0.449735246022859	8222.75505753565	3657.07681947609	8500.22437957158
Smp_171820	XLOC_005389	patatin-like phospholipase domain-containing protein 7	♂	N.S.	N.S.	0.422331322872051	7285.142507101	1996.52732066616	7037.56006823816
Smp_068170	XLOC_004287	pyruvate dehydrogenase	♂	N.S.	N.S.	0.375389676965212	4834.9290988551	2254.99523464296	5043.41713762539
N.A.	XLOC_008854	glucosamine-fructose-6-phosphate aminotransferase	♂	N.S.	N.S.	0.359644595222335	186.187220550288	28.5089882811549	149.369176707189
Smp_194380	XLOC_002911	glycoprotein-n-acetylgalactosamine 3-beta-galactosyltransferase	♂	N.S.	N.S.	0.345068446557459	356.293919533277	64.6130817633317	275.535203841319
Smp_198970	XLOC_031145	phospholipase a2	♂	N.S.	N.S.	0.343766148502104	8477.50587100151	2966.58372518347	7340.18067720126
N.A.	XLOC_030585	glycolipid transfer protein domain-containing protein 1	♂	N.S.	N.S.	0.177505014976691	21.5783335597539	2.94106374514739	18.5853531101637
Smp_160830	XLOC_012264	Phospholipase D3	♂	N.S.	N.S.	0.148954491705196	2572.00768292229	311.370346948292	1789.06601737469	100*
PHOSPHATASES				#N/A	#N/A	#N/A
N.A.	XLOC_002304	acid phosphatase-related	♀	Inf	N.S.	N.S.	15.2222553679175	0	0.259307090959354
N.A.	XLOC_011638	acid phosphatase-related	♀	Inf	N.S.	N.S.	15.1928481091787	0	1.01033555666817
N.A.	XLOC_007350	acid phosphatase-related	♀	Inf	N.S.	N.S.	14.9396818869692	1.11026839494576	1.36308422504819
N.A.	XLOC_018493	acid phosphatase-related	♀	Inf	N.S.	N.S.	9.69777754172707	1.57173793952893	1.21992087543261
N.A.	XLOC_032452	acid phosphatase-related	♀	Inf	N.S.	N.S.	8.05614004828526	1.3765956314996	0.209585318764443
N.A.	XLOC_027929	acid phosphatase-related	♀	Inf	N.S.	N.S.	7.85891356694344	0	0
N.A.	XLOC_011952	acid phosphatase-related	♀	Inf	N.S.	N.S.	7.78432724578656	0.834255198991798	0.62875595629333
N.A.	XLOC_003858	acid phosphatase-related	♀	Inf	N.S.	N.S.	7.04347515944735	1.73164927819622	0.67699684155139
N.A.	XLOC_020108	acid phosphatase-related	♀	149.278623607069	N.S.	N.S.	31.0534890297354	0.688297815749801	0.209585318764443
N.A.	XLOC_019284	acid phosphatase-related	♀	88.367694827065	N.S.	N.S.	18.4668894638084	1.3142767068311	1.46252776943801
N.A.	XLOC_020769	acid phosphatase-related	♀	56.6419524792434	N.S.	N.S.	11.9111001684907	0.347783820815472	0.209585318764443
N.A.	XLOC_011162	acid phosphatase-related	♀	55.0822759717685	N.S.	N.S.	160.973767333453	0.994166537659082	3.8369228183217
N.A.	XLOC_011329	acid phosphatase-related	♀	50.6966304554046	N.S.	N.S.	10.6825622180218	0	0.953004129464703
N.A.	XLOC_003314	acid phosphatase-related	♀	48.6072609456086	N.S.	N.S.	10.2508160947597	2.14150705181097	1.47774707945511
N.A.	XLOC_012552	acid phosphatase-related	♀	43.0749627084875	N.S.	N.S.	9.10762514389726	0.475178528139239	0.524742949990411
N.A.	XLOC_015930	acid phosphatase-related	♀	40.5725694119738	N.S.	N.S.	8.59053202102869	46.581408502886	0.62875595629333
N.A.	XLOC_016900	acid phosphatase-related	♀	38.9600583679151	N.S.	N.S.	110.720037637387	7.62730472547028	7.03116524941804
Smp_082430	XLOC_012617	uridine phosphorylase	♀	25.5556674954514	N.S.	3.95697171575268	5048.50590059427	501.198770236579	697.329659549004
Smp_155910	XLOC_015477	acid phosphatase-related	♀	23.5487205267957	N.S.	N.S.	47.7278666587112	0.695567641630943	3.74825592313843
N.A.	XLOC_003740	acid phosphatase-related	♀	21.2333809561613	N.S.	N.S.	11.4018479788425	0.159911338667284	0.776440385941211
Smp_205980	XLOC_034512	acid phosphatase-related	♀	16.5763371886334	N.S.	N.S.	21.6591572764083	19.6517041178933	6.88792348058071
N.A.	XLOC_002241	acid phosphatase-related	♀	15.4749086984718	N.S.	N.S.	291.905232384788	40.5602926441009	54.0264815395042
N.A.	XLOC_010307	acid phosphatase-related	♀	15.4117680701557	N.S.	N.S.	40.4481391089058	9.62585622389524	8.35024602969441
N.A.	XLOC_006696	acid phosphatase-related	♀	13.7524153263702	N.S.	N.S.	24.1648063815597	13.2584740860346	17.9753666271425
N.A.	XLOC_023519	acid phosphatase-related	♀	13.4532325142891	N.S.	N.S.	10.3985960380399	0	1.24385190872816
N.A.	XLOC_004424	acid phosphatase-related	♀	12.8819978802908	N.S.	N.S.	11.3695209748745	4.59862201756168	2.26327800734173
N.A.	XLOC_008542	acid phosphatase-related	♀	9.43765248487211	N.S.	N.S.	107.44772274839	56.0781738010254	36.2632450898729
N.A.	XLOC_016253	acid phosphatase-related	♀	8.38448841457824	N.S.	N.S.	24.1338456901643	2.01624098616874	5.00267926074885
N.A.	XLOC_010588	acid phosphatase-related	♀	8.18426789904235	N.S.	N.S.	184.1030158367	16.1495234513336	68.0914520762079
N.A.	XLOC_015091	acid phosphatase-related	♀	7.6635500573068	N.S.	N.S.	44.6904021352387	13.120840743425	7.34151816106564
N.A.	XLOC_000828	acid phosphatase-related	♀	7.3524866831523	N.S.	N.S.	55.0414187308168	3.98388274388714	15.0792828155136
N.A.	XLOC_019612	acid phosphatase-related	♀	7.07069502610442	N.S.	N.S.	194.027481412926	40.6908263373407	59.0876830003689
N.A.	XLOC_000379	acid phosphatase-related	♀	6.15947613651642	N.S.	N.S.	38.9617871054602	17.6069792580957	19.1447296738245
N.A.	XLOC_019745	acid phosphatase-related	♀	6.11643992476795	N.S.	N.S.	62.3635771092897	3.36492870681777	12.1220541674614
N.A.	XLOC_012438	acid phosphatase-related	♀	6.03257268073426	N.S.	N.S.	38.3773134644659	4.48702241550728	6.01876476682175
N.A.	XLOC_008263	acid phosphatase-related	♀	5.65938833682033	N.S.	N.S.	81.5006055395421	25.6149251601928	44.4003584032972
N.A.	XLOC_001874	acid phosphatase-related	♀	4.89557103424089	N.S.	N.S.	63.0824639328286	19.9280677718738	30.8157253187676
Smp_081450	XLOC_007200	adenosine diphosphatase	♀	3.66080099955355	N.S.	N.S.	6640.07221400323	2506.13949780583	2770.14505514961
N.A.	XLOC_031157	acid phosphatase-related	♀	N.S.	Inf	N.S.	25.4165735724021	16.4701223510989	22.3290923036598
N.A.	XLOC_009376	acid phosphatase-related	♀	N.S.	N.S.	10.5526873730586	1.98424353802002	5.8802863404507	14.9613605535371
N.A.	XLOC_021683	acid phosphatase-related	♀	N.S.	N.S.	5.7548308329801	22.4882937112328	151.878275026462	129.226466969567
N.A.	XLOC_008339	acid phosphatase-related	♀	N.S.	N.S.	2.0593967878972	226.223430204494	462.388584764731	334.769297439351
Smp_210040	XLOC_013467	acid phosphatase-related	♂	0.0586751080360146	N.S.	N.S.	84.4346137286849	28.8665941416888	205.543276947124
N.A.	XLOC_006858	acid phosphatase-related	♂	0.0427626552845399	N.S.	N.S.	11.4374714525064	7.28547133173643	11.7470137758069
N.A.	XLOC_024416	acid phosphatase-related	♂	0.0268685229165623	N.S.	N.S.	9.67557559676506	1.61985793690293	4.73892950897894
N.A.	XLOC_013965	acid phosphatase-related	♂	0.0248038289762116	N.S.	N.S.	20.9198115449466	5.17133972706937	22.3855541545093
Smp_140610	XLOC_033804	acid phosphatase-related	♂	0.0192589707822658	N.S.	N.S.	10763.4294843545	1741.32918716942	13252.1189835072
Smp_168980	XLOC_023443	acid phosphatase-related	♂	0.0132193963257009	N.S.	0.421315347622718	653.42447140882	396.397599523291	941.389078897198
Smp_059910	XLOC_025804	Serine:threonine protein phosphatase PGAM5	♂	N.S.	0.244421902658933	N.S.	1261.92251077717	2482.08717061566	1552.47282556814	100*
N.A.	XLOC_001287	acid phosphatase-related	♂	N.S.	N.S.	0.213691503328454	26.6702508167119	10.2013307913897	21.6508938643276
N.A.	XLOC_002152	acid phosphatase-related	♂	N.S.	N.S.	0	6.56742482911261	0.319822677334568	7.4917687860211
ATP RELATED PROTEINS				#N/A	#N/A	#N/A
N.A.	XLOC_022996	atpase n2b	♀	4.32876010924944	N.S.	N.S.	1119.44441792495	306.159071684302	427.604509035056
Smp_015780	XLOC_022994	atpase n2b	♀	3.13105680272563	N.S.	N.S.	2166.85159774331	464.823557880812	835.579839270264
Smp_127730	XLOC_021349	atp-citrate synthase	♀	3.005121852469	N.S.	N.S.	3506.65231719186	2863.01806971362	2201.87742250716
Smp_062890	XLOC_016195	atp synthase	♂	N.S.	0.41779161346728	N.S.	5170.17512528658	5572.18842314342	4513.12920837073
Smp_002880	XLOC_019006	atp synthase alpha subunit mitochondrial	♂	N.S.	0.290074107030844	N.S.	18134.9758642592	45174.3013882164	24080.4404844162
Smp_082120	XLOC_029332	ATP synthase subunit delta, mitochondrial	♂	N.S.	0.183210738179853	N.S.	9410.69001596619	13252.5617996144	7930.17305689322	100*
Smp_019750.2	XLOC_030017	ATP synthase, subunit d	♂	N.S.	0.167048268119905	0.505636754090096	17543.1018936586	19166.7731351323	13772.0082666029	100*
MITOCHONDRIAL PROTEINS				#N/A	#N/A	#N/A
Smp_057060	XLOC_004648	mitochondrial acetate:succinate -transferase	♀	6.66082281065763	N.S.	N.S.	15363.4913723512	3964.25265341428	4190.07878954766
Smp_099420	XLOC_019152	brain protein 44-like	Switch	4.72564088430725	0.470814733866793	N.S.	9212.22821374641	3186.84444767667	2817.60738091823
Smp_102510	XLOC_017883	translocator protein	♀	4.12478382925315	N.S.	N.S.	6638.37970893224	4577.52309581129	2527.52491168333
Smp_018430	XLOC_012687	mitochondrial signal peptidase (s26 family)	♀	3.95860470672759	N.S.	N.S.	3141.38483963046	1017.12445483893	1180.60471574575
Smp_167330	XLOC_028129	mitochondrial succinyl- ligase	♀	3.24962341125015	N.S.	N.S.	9115.8822280579	2130.3530352274	3740.59783443482
Smp_154090	XLOC_019465	mitochondrial fission regulator 2	♀	N.S.	N.S.	2.78993514001369	87.6144363228274	586.425446556298	194.030263025558
Smp_165830	XLOC_023210	28s ribosomal protein mitochondrial	♂	0.27560657383114	0.340496873870152	0.510673629827539	974.055400402366	1103.91927409834	1087.34787837224
Smp_010930	XLOC_020997	mitochondrial import receptor subunit tom70	♂	0.360318180248857	N.S.	N.S.	3737.06024144526	4266.62615511005	5415.08609469405
Smp_012410	XLOC_008229	28s ribosomal protein mitochondrial-like	♂	0.343794153069959	N.S.	N.S.	3508.1371676134	5150.70424896666	5212.91452611527
Smp_161350	XLOC_002505	succinate-semialdehyde dehydrogenase	♂	0.326530590903299	N.S.	N.S.	1715.41355077083	2183.61547009343	2327.16882071181
Smp_055190	XLOC_017241	mitochondrial solute carrier-related	♂	0.322006522834012	N.S.	N.S.	1628.18628501772	1906.60312259899	2088.05521870295
Smp_094050.2	XLOC_007192	mitochondrial processing peptidase	♂	0.317267428053137	N.S.	N.S.	1606.76236436576	3011.66715126969	2226.47824518913
Smp_137190	XLOC_031400	frataxin mitochondrial precursor	♂	0.308616242267735	0.430102582164711	N.S.	1450.65777339905	2302.61398161967	1819.50136572638
Smp_080670	XLOC_030834	ethylmalonic encephalopathy 1	♂	0.294008434313326	N.S.	N.S.	925.990387578077	878.089275086533	1246.81006476373
Smp_042560	XLOC_026953	mitochondrial import receptor subunit tom40	♂	0.242023738815725	0.349514675777365	N.S.	1661.73168122165	5643.92756540702	2702.33565485666
Smp_061230	XLOC_028904	succinate dehydrogenase	♂	0.231968104318795	0.293271426377853	N.S.	8005.97964563262	17576.7761348191	13461.3744144983
Smp_062420.3	XLOC_017062	mitochondrial import receptor subunit tom34	♂	0.20760922997615	0.320214089582597	N.S.	22144.0080791028	38874.6410506646	37814.9491365807
Smp_172300	XLOC_006767	Mitochondrial ribosomal protein L21	♂	0.207309205833772	0.205136168298466	N.S.	1289.60828024524	3341.3597331345	1628.95763488851	100*
Smp_121130	XLOC_030046	mitochondrial carrier triple repeat protein	♂	0.188739779834967	0.257463897562278	N.S.	2523.18163412005	4225.82382335479	3047.29604265052	100*
Smp_177790	XLOC_024987	nfu1 iron-sulfur cluster scaffold mitochondrial-like	♂	0.182989130720656	N.S.	0.535933463289432	1791.30170769629	1535.08247555688	1734.86728369088
Smp_199730	XLOC_034107	cytochrome c oxidase subunit xv assembly protein	♂	0.180134906072309	0.310816022949947	0.525165482478603	3329.64578195873	4896.30574367446	3931.9368422807
N.A.	XLOC_025216	Methionine aminopeptidase 1D mitochondrial	♂	0.145731429065981	0.241242477061377	N.S.	2195.22896115641	5872.99235172659	2585.75151013487	100*
Smp_091010	XLOC_025501	Hydroxyacylglutathione hydrolase, mitochondrial	♂	0.1410564768647	0.246759314957514	0.409467364839223	10926.1617040411	13822.0241599172	14245.7538663738	100*
Smp_147510	XLOC_023350	cytochrome c oxidase assembly protein cox15	♂	0.103075192839728	0.244470306579238	0.472399822240328	182.86616122233	189.982699057724	260.364415135946
Smp_196730	XLOC_000594	Hypothetical mitochodrial protein	♂	0.00487273588009213	N.S.	0.224877293932986	249.508054856286	204.124811874359	271.185639461379	100*
Smp_029150	XLOC_011373	cytochrome c oxidase copper chaperone	♂	N.S.	0.477903601352754	N.S.	4039.63997422351	5387.55044545969	3218.59602837578
Smp_029060	XLOC_012747	hexaprenyldihydroxybenzoate mitochondrial	♂	N.S.	0.458705785713587	N.S.	2584.55269361744	3309.51284382749	3209.87120895901
Smp_210450	XLOC_004567	mitochondrial 28s ribosomal protein s29	♂	N.S.	0.449566059238943	N.S.	949.767995053088	1741.68140234728	1220.51398885054
Smp_008310	XLOC_001963	succinate dehydrogenase subunit integral membrane protein	♂	N.S.	0.436686583861878	N.S.	7293.53412086688	8582.40462477532	8938.53544586372
Smp_037910	XLOC_001661	succinate dehydrogenase	♂	N.S.	0.432300378765323	N.S.	5456.01932443194	7558.48502772234	6502.36095054294
Smp_062790	XLOC_004377	grpe protein	♂	N.S.	0.428918535514972	N.S.	3580.44220130714	7056.61691675497	4921.32424421876
Smp_035410	XLOC_003813	mitochondrial ribosomal protein l24	♂	N.S.	0.406180820681896	N.S.	4316.38966994177	6055.20578123214	5041.04759508058
Smp_025950	XLOC_004476	mitochondrial import receptor subunit tom20 homolog	♂	N.S.	0.403559976825469	N.S.	4505.40181023125	6369.76204454693	5000.49665597247
Smp_064150	XLOC_010155	mitochondrial carnitine acylcarnitine carrier protein	♂	N.S.	0.398319813347393	N.S.	7467.76336003061	4519.90389208765	7118.65290842628
Smp_171940	XLOC_022653	mterf domain-containing protein mitochondrial	♂	N.S.	0.36935834373737	N.S.	1521.00687916075	1228.14293860557	1509.13707871146
Smp_138280	XLOC_013402	39s ribosomal protein mitochondrial-like	♂	N.S.	0.367854107025866	N.S.	1026.8839494143	2184.47079457994	1221.74180864238
Smp_037120	XLOC_022648	mitochondrial 39s ribosomal protein l27 (mrp-l27)	♂	N.S.	0.358102399981884	N.S.	3169.22062421553	2815.95083496751	2511.49399252859
Smp_022850	XLOC_025153	mitochondrial ribosomal protein s31	♂	N.S.	0.336757873865152	N.S.	4393.1942880259	5756.6615457859	4027.66288869979
Smp_007300	XLOC_004572	chch domain-containing protein mitochondrial precursor	♂	N.S.	0.330658572905342	N.S.	15116.4689998064	26800.0793302291	20082.4782486016
Smp_080610	XLOC_030847	mitochondrial nadh:ubiquinone oxidoreductase esss	♂	N.S.	0.312753994964934	N.S.	2586.23303820758	4361.05022857618	3415.51525559662
Smp_009650	XLOC_029560	mitochondrial processing peptidase beta-subunit (m16 family)	♂	N.S.	0.306313020209233	N.S.	18540.1497974915	20702.6361184074	15463.6522599173
Smp_021730	XLOC_029741	cytochrome c oxidase subunit mitochondrial-like	♂	N.S.	0.273702543942885	N.S.	23423.5753902456	23363.6263982981	18948.1629770155
Smp_080980	XLOC_023209	mitochondrial import inner membrane translocase subunit tim23	♂	N.S.	0.263875103370382	N.S.	4131.94090220527	7474.86506863039	4246.85337141011
Smp_091170	XLOC_025483	mitochondrial ribosomal	♂	N.S.	0.224843069140788	0.476196131396659	2099.0759885508	3859.33389436727	2029.04320089738
Smp_128610	XLOC_025624	Cytochrome c oxidase subunit IV	♂	N.S.	0.201832650421938	0.509115078621248	21144.6811019154	26625.4398296307	19689.2446396676	100*
Smp_212720	XLOC_012436	methylmalonyl- mitochondrial-like	♂	N.S.	N.S.	0.204648914110339	518.896388505654	51.4200263766687	135.763350798373
AUTOPHAGY				#N/A	#N/A	#N/A
Smp_044260	XLOC_011557	apg10p-like protein	♂	0.255755520119727	N.S.	N.S.	1170.50239703907	1022.92784581585	1327.86268976283
Smp_044470	XLOC_025370	autophagy-related protein 3	♂	0.23532038569533	0.422367550527655	0.423829476619394	1505.06777776121	1432.79749751229	1871.97129292601

[truncated: 9 more sheets: Sheet12 - MembraneProteins, Sheet13 - Extracell.Matrix, Sheet14 - Cytoskeleton, Sheet15 - Ves.Comp.&Lysosomes, Sheet16 - MobileElements, Sheet17 - UndefinedFunctions, Sheet18 - 7,168SexBias, Sheet19 - 4,065PutativeProducts, Sheet20 - SexBiasedSmpGenes]
