# Supplementary material for: Sex-Biased Transcriptome of Schistosoma mansoni: Host-Parasite Interaction, Genetic Determinants and Epigenetic Regulators Are Associated with Sexual Differentiation
Source: PLoS Negl Trop Dis. 2016 Sep 27;10(9):e0004930. doi: 10.1371/journal.pntd.0004930 (PMC5038963; doi:10.1371/journal.pntd.0004930)
Supplement: S6 Table — (XLSX) [file pntd.0004930.s009.xlsx]

## Sheet: Sheet1_Homeogenes
Ref (v5.2) IDs	CuffLinks IDs	NAME (Blast-to-GO annotation)	Cercariae				Schistosomula s#2				Adults
			Expression in male (rpkm)	Expression in female (rpkm)	FoldChange	Padj	Expression in male (rpkm)	Expression in female (rpkm)	FoldChange	Padj	Expression in male (rpkm)	Expression in female (rpkm)	FoldChange	Padj
Smp_137890	XLOC_011364	homeobox protein 4	345.58121799652	1123.99836671944	3.25248684878111	0.0196796932232562	128.366124426105	115.104528271437	0.896689284544834	1	366.752649114653	173.743700373919	0.473735365765834	0.0390333684703099
Smp_138390	XLOC_012123	homeobox protein nkx- -like	109.02667413635	34.0634241679247	0.312432021225599	0.179649657912903	4.80394022872957	20.2038989621476	4.20569324350037	0.406811913328689	116.795118545183	23.7818429706292	0.203620179223748	0.0193830950492027
Smp_154800	XLOC_005605	homeobox protein	62.4741787322206	0	0	0.00149519946726023	0	0	NA	NA	48.5868355373049	4.04134222667267	0.083177720507641	9.78649349573216e-05
Smp_145200	XLOC_026961	homeobox protein engrailed- partial	125.404010024186	2.4570759009379	0.0195932801547894	2.18746147244958e-08	142.373585807153	100.921444356945	0.708849494692399	0.821682919549366	140.680988652181	221.903377502549	1.57735156419168	0.518401232344806
Smp_127240	XLOC_029617	homeobox protein six-related	479.144578624929	7.65380118376202	0.0159738866413291	0.0121269225098754	23.2591002393299	29.283401228896	1.25900834200712	1	240.880453375966	76.6876433171353	0.318363911402314	0.0023599978194487
Smp_144380	XLOC_013486	muscle segment homeobox d	190.19824061936	60.8890214716702	0.320134514774646	0.0439888295749368	59.4738526188995	45.1636489838535	0.759386637910546	1	265.853902002654	117.057805317874	0.440308772736031	0.0312451121802918
Smp_009040	XLOC_015065	pou4 brn-3	195.392666738335	33.9142515256109	0.173569725475051	0.00193389317132967	232.144163901102	215.470051006265	0.928173456465007	1	193.523361504289	679.535204574322	3.51138590861684	8.75096533763959e-05
Smp_063520	XLOC_005689	pre-b-cell leukemia transcription factor 4	80.9660854420608	2.49436906151634	0.0308075788510402	0.000358798157338303	10.4137163765377	7.14698501313143	0.686304941935399	1	62.0826513626862	192.89030349519	3.10699203821574	0.00243209747314972
Smp_161270	XLOC_031472	homeobox domain containing protein	2.26548787071231	432.099697869406	190.731410860984	1.75849418359272e-15	13.6314215339443	13.9884740701693	1.02619334567094	1	3.62437572568355	14.4849068706856	3.99652463403301	0.446996946734333
Smp_136900	XLOC_017332	homeobox protein distal-less dlx	2.05130258889985	35.4117275019685	17.2630443180791	0.00301610388001698	4.10837258709863	6.02081504765564	1.46549878814852	1	2.06853317992743	2.85901238839411	1.38214480489717	1
Smp_199560	XLOC_033843	homeodomain transcription factor 1	3474.76093027851	10109.4095736239	2.90938276804373	0.0499154469131361	1741.66114383054	2241.77318152392	1.28714657811878	0.807961593535179	4301.60982817707	3249.55679310136	0.755428065980233	0.7483213117161
Smp_146580	XLOC_009767	homeobox protein meis3	502.373526753907	1727.03619319588	3.43775318806138	0.0174233259866918	595.425445757017	761.280073408711	1.27854810175408	0.828745789637139	561.891392396193	465.374302447787	0.828228210550071	0.948911456687699
Smp_173830	XLOC_006593	homeodomain transcription factor 2	1108.28095347816	4572.43653215189	4.12570162629074	0.00523487711965085	421.120781697528	856.736785960363	2.03442058239652	0.213937345933515	1382.95067237968	1345.62839878181	0.973012577857423	1
Smp_079260	XLOC_003667	lim homeobox protein	2.05130258889985	82.6240234211069	40.2788081427907	1.60157095411438e-06	1.39113528326189	19.119218097132	13.7436080639849	0.136796872844888	2.58418558797243	17.6879078223005	6.84467396793219	0.146751254911681
Smp_144120	XLOC_002958	lim homeobox protein awh	3.70441802391636	125.822952945472	33.9656464613705	2.65283682150728e-07	41.4795639660162	31.7590044466522	0.765654250191058	1	11.3680471679797	21.3100794114443	1.87455937651878	0.877420168393571
Smp_097470	XLOC_006267	homeobox protein aristaless-related	6.965373779337	412.177765840614	59.1752544656473	1.46445003022519e-12	9.73794698283321	9.12173689883999	0.936720739486514	1	3.09983799601744	13.1879141780001	4.25438819542939	0.446286552511552
Smp_169500	XLOC_031015	antennapedia-like homeobox protein	4.51588403655382	120.498576377233	26.683275168684	7.60996339843983e-07	21.172397314437	27.8653164969362	1.31611532143011	1	3.09687622214374	12.3890536830411	4.00050011506921	0.544930663526024
Smp_149570	XLOC_028932	pou class transcription factor 1-a-like	31.2280928068642	118.019979119396	3.77928872727874	0.0352679755480775	14.6521554890104	22.9156011246866	1.56397474363919	0.994377674059364	49.6033314840265	59.2723214696371	1.19492622161325	1
Smp_140350	XLOC_010806	homeobox protein aristaless-related	0.413278858754129	32.6935994769816	79.1078439761949	0.000468067901432848	0	0.319822677334568	Inf	1	3.61549040406245	0.953004129464703	0.263589174069965	1
Smp_017020	XLOC_024624	visual system homeobox 2	0	151.262953754595	Inf	1.9995165484567e-12	3.91327279903753	3.36492870681777	0.859875832741683	1	1.03722836383742	2.62968667958025	2.53530155100198	1
Smp_163140	XLOC_027318	pituitary homeobox	3.09204558822057	80.4279996442181	26.0112593263876	1.84940937621232e-05	3.78320627366346	7.49471560131657	1.98104862890785	1	4.13410458598115	5.83268763119515	1.41087084515809	1
Smp_129490	XLOC_011525	lim homeobox protein lhx5-like	2.05130258889985	38.50853668596	18.7727236802313	0.0016169159677823	2.08670292489283	4.51900658314413	2.16562047679893	1	1.03426658996371	0.419170637528887	0.405282972104506	1
Smp_035650	XLOC_000614	homeobox protein aristaless-related	164.086213993496	720.707872202934	4.39225121149728	0.00383894618811127	141.027685538651	271.685717547681	1.92647079550363	0.243086465892462	231.115637135721	239.61942764728	1.03679452683059	1
Smp_138140	XLOC_014466	gsx family homeobox protein	0.413278858754129	162.188530818801	392.443328235406	7.16384411084916e-12	6.5004435775002	12.4587576948072	1.91660115902403	0.980606126401769	1.03426658996371	2.62968667958025	2.54256175834947	1
Smp_053520	XLOC_016808	homeobox protein aristaless-like 3	2.26548787071231	29.2984450083626	12.9325102054732	0.0152854268024418	8.15171191151022	14.5308145026771	1.78254759986789	0.970206614462638	3.10279976989114	14.6390505051913	4.71801327537965	0.38292046641695
Smp_128060	XLOC_029282	homeotic protein spalt-major	75.8651109659315	336.385617214563	4.43399624585829	0.00681158587193573	98.632017376109	76.1434685215836	0.771995448812826	0.98869143026708	102.946547874811	151.982528516626	1.47632467192048	0.678901231139175
Smp_160670	XLOC_016875	paired box protein pax-6	1.85220901195818	173.839926593657	93.8554587907283	1.77201132087829e-10	6.6955433655613	15.8795022233261	2.37165250919033	0.80766372105853	7.239866129746	21.0055716283223	2.901375695611	0.50716247588872
Smp_027990	XLOC_006236	nk homeobox 2-1	7.0106488939494	193.421947480003	27.5897353306251	1.05771783233025e-07	23.6945348302127	37.7240036726067	1.59209724702023	0.850880050785335	10.8523947599347	21.6145871945662	1.99168825615925	0.812910080230406
Smp_164180	XLOC_002197	par domain protein	26.9565774618645	117.492125318078	4.35856983269832	0.023989089576599	4.10837258709863	6.5073396584623	1.58392149701735	1	20.688293573148	6.78569176065985	0.327996687434251	0.408171930669698
Smp_170750	XLOC_017450	paired box protein pax-6	1.43893015320405	203.399423726069	141.354619105841	6.40851063282722e-12	15.523024670776	28.7274796067786	1.85063672937798	0.842927791844645	13.4454656695283	46.0487059974277	3.42485021562241	0.0784424205780653
Smp_045470	XLOC_028377	Prospero-like homeobox domain containing protein	3.88841989598723	567.234599723751	145.877918253923	2.65243673186945e-16	162.870213727885	361.149361342283	2.21740582931678	0.0812430314185799	6.20856131365599	57.8136261706667	9.31191998434536	0.584889292163629
Smp_129480	XLOC_011527	lim homeobox 5	6.36809304851201	168.329084222526	26.4332011074898	1.36150741848956e-07	9.60788045745914	34.525776899261	3.59348526994387	0.260547349842286	8.78386158000732	13.8758913044417	1.57970286508432	1
Smp_013600	XLOC_012965	nk homeobox protein	0.413278858754129	53.2136989310089	128.759789676702	6.17165257982848e-06	4.73890696604254	2.7531912629992	0.580976010444534	1	0	0.419170637528887	Inf	1
Smp_126560	XLOC_005102	orthopedia homeobox protein	2.46458144765398	191.476953576704	77.6914691778477	1.26546708260978e-10	7.52117753256631	25.112125233937	3.33885553494819	0.43551871349266	3.11168509151225	26.3006462816921	8.45221978066881	0.0223751171002943
Smp_162760	XLOC_024267	homeobox protein prospero	79.1260667213521	150.713578596378	1.90472728951795	0.376322090614274	103.670653888752	123.628854447699	1.19251543045502	1	89.4536938233033	286.925645557294	3.20753267186545	0.000467005517943801
Smp_142430	XLOC_007651	paired box protein pax-1-related	0	0	NA	NA	2.08670292489283	20.0786861291357	9.62220634744491	0.16828260588255	0	18.6014311716663	Inf	0.00296701457026354
Smp_003280	XLOC_000398	lim homeobox protein lhx2- partial	163.552201495775	199.407578688195	1.21922894870569	0.84525918530192	120.760115382925	135.153815426459	1.11919249992344	1	215.66087376374	470.603439919831	2.18214566094815	0.0189334295295008
Smp_174610	XLOC_032224	lim homeobox protein lhx3-like isoform 1	13.930747558674	62.743657250133	4.50396915067674	0.0277513745926406	102.37562715392	101.254848223889	0.989052287529871	1	6.21152308752969	53.941545522058	8.68410931778577	0.000470897729078821
Smp_142440	XLOC_007652	retinal homeobox 1a	29.8826142965063	4.91415180187581	0.164448523583505	0.334786540295898	20.6973662277014	83.7483247030398	4.04632762360609	0.0420298571469397	27.3917748777331	45.4791712112826	1.66032217387464	0.799105674498142

## Sheet: Sheet2_GrowthFactors
Ref (v5.2) IDs	CuffLinks IDs	NAME (Blast-to-GO annotation)	Cercariae				Schistosomula s#2				Adults
			Expression in male (rpkm)	Expression in female (rpkm)	FoldChange	Padj	Expression in male (rpkm)	Expression in female (rpkm)	FoldChange	Padj	Expression in male (rpkm)	Expression in female (rpkm)	FoldChange	Padj
Smp_044530	XLOC_025348	growth factor receptor bound protein 2	8251.63341312369	2435.27074323525	0.295125900692839	0.0179060532182008	7970.40756948538	2761.31865349961	0.346446355399853	0.00152077455925058	8227.73995110478	3735.24194636622	0.453981526951963	0.00534679920696799
N.A.	XLOC_034575	Epidermal growth factor receptor - tyrosine kinase	273.248713473683	42.164743278628	0.15430902763496	0.000465323959726338	207.737145872535	55.772867625964	0.268478068241996	0.0218929905645714	357.225078538326	105.965744327518	0.29663579265236	0.000133346902331759
Smp_141030	XLOC_034035	epidermal growth factor receptor kinase substrate 8-like	244.210650013177	60.2650599922959	0.246774905144571	0.0123006238906419	445.086726616304	351.168443460126	0.788988802541528	0.953856208133029	212.919714160461	62.3963608610543	0.293051120733851	0.0312451121802918
Smp_130920	XLOC_000080	extended synaptotagmin-2	2007.50955871022	465.134685344813	0.231697370170258	0.00235232566802903	291.541706219499	302.65121036417	1.03810605449468	1	2343.8172177226	856.113146856611	0.365264467034023	0.0002886371860499
N.A.	XLOC_034752	eps8-related protein	92.4897169589427	5.4577774068732	0.0590095589685497	2.07802658306916e-05	47.9800075435164	15.8515943124755	0.330379154236243	0.259258782373401	113.707127644661	42.691561411307	0.37545193775996	0.0360331608487611
Smp_123300	XLOC_019070	Follistatin	909.327813663843	49.9677171047038	0.0549501690742032	6.95081694686472e-09	161.54411170731	125.604351865039	0.777523554016085	1	973.722010503542	306.100391000995	0.3143611705385	2.64034340934361e-05
N.A.	XLOC_026778	lipopolysaccharide-induced transcription factor regulating tumor necrosis factor alpha	238.032361663979	4.98873812303269	0.0209582347885751	0.00404877149660283	137.63467884111	50.4324415018063	0.366422488332516	0.0677662319072366	149.408576528588	21.768730829072	0.145699338919187	2.3744423615485e-07
N.A.	XLOC_026641	egf-like domain protein	74.3838071117363	0.506332444418957	0.00680702513193987	0.000346244364595116	1.39113528326189	6.43794264715154	4.62783362956338	0.868916983663598	83.1918205799207	7.92854081883958	0.0953043311658602	0.00288074422261048
Smp_050520	XLOC_017262	neurogenic locus notch homolog protein 2-like	6105.59363428288	432.323456832876	0.0708077678811413	2.94643856921693e-08	195.035988264136	110.642083041625	0.567290601218601	0.92702678344415	6309.26435570464	1820.35382840971	0.288520772911315	1.28149468047602e-06
Smp_000530	XLOC_029461	zinc finger transcription factor gli2	3534.39267207475	234.958456582018	0.0664777455087052	0.014271426799922	664.92845369524	1452.25811737229	2.18408177496629	0.0438826024966006	5094.14092337738	2045.92263776739	0.40162270116606	0.0193830950492027
N.A.	XLOC_034449	lipopolysaccharide-induced transcription factor regulating tumor necrosis factor alpha	4347.18963438426	1342.01670939226	0.308709033251627	0.0243139762938451	2618.20868718461	1933.26951072908	0.738393971493519	0.653758526071893	5132.77931269427	4606.91644897961	0.897548125162112	1
Smp_025370	XLOC_023606	lipopolysaccharide-induced transcription factor regulating tumor necrosis factor alpha	7329.83989477697	2471.16860081002	0.337138141662671	0.0456390198550433	4680.76082950043	3857.62712827675	0.824145319274617	0.936466352423476	6413.63164377676	7903.24219930938	1.2322569549154	1
N.A.	XLOC_023899	lipopolysaccharide-induced transcription factor regulating tumor necrosis factor alpha	538.895300149835	5.53236372803008	0.0102661198316108	6.47203321387902e-15	347.028731566563	626.653687782133	1.80576889110386	0.657903879431686	659.379011501415	381.979928930189	0.579302528996814	0.127043680774271
Smp_157540	XLOC_002824	SmadA protein	2957.06124701705	925.887345386308	0.313110641966007	0.0191880729147702	1479.88750263798	1165.64623975999	0.787658681948569	0.902342104386403	3617.17322336442	2662.68219926671	0.736122390287433	0.615144030488897
Smp_062950	XLOC_032772	growth factor receptor bound protein 2	2542.56983368278	626.822633272415	0.246531137500556	0.00462870914015038	2502.30652198228	1780.53497834018	0.711557502127945	0.686725199707801	3505.1357006888	2220.88099743139	0.633607707968329	0.243730039883988
Smp_159520	XLOC_022335	acidic fibroblast growth factor intracellular binding protein	13.5325604047907	0	0	0.0237150601319246	0	0	NA	NA	13.448427443402	1.79134540452248	0.133201105635688	0.237771049536311
Smp_168070	XLOC_006416	TNFR	2174.20081304892	756.957297897288	0.348154270458484	0.0437841315083806	1182.43077906866	1183.16767391347	1.00062320336873	1	2501.00500697997	2708.91237593411	1.08312952927879	1
Smp_152680	XLOC_032694	epidermal growth factor receptor	124.209448562536	23.1478693541783	0.186361582166786	0.00584637733726239	33.2373820249848	41.2563798445279	1.24126442369965	1	141.650096216923	187.912761003814	1.32659818822886	0.814114459514427
Smp_062560	XLOC_017071	wnt inhibitor frzb2	821.559461782403	79.3407484342233	0.0965733487653963	1.79810565201803e-06	1051.13514826694	822.643047293225	0.782623479625394	0.888799692849797	985.036745741795	1510.37251951061	1.53331591541105	0.378568308918997
Smp_157070	XLOC_023744	cysteine-rich with egf-like domains protein	3547.12764535784	125.183219662419	0.0352914335705531	1.56111146618517e-11	3164.47263022242	1590.51343856132	0.50261564071405	0.273585947920078	4397.16659870432	2266.33958529202	0.515409078646196	0.191672148967415
Smp_145140	XLOC_016991	wingless-type mmtv integration site family member 5	1422.44020328135	100.83621961651	0.070889601815174	6.16042513339135e-08	638.33010298324	504.776905844723	0.790777222452215	0.932455839227303	1784.23456594412	1347.33153773315	0.755131395529383	0.71213739520267
Smp_124450	XLOC_008462	bmp receptor	3106.27000673216	755.646287723823	0.243264843714849	0.00322253787972853	2639.42958279551	2136.31360743231	0.809384581182755	1	3553.19769474241	2897.93100642417	0.815583948709687	0.91523250836566
Smp_076490	XLOC_030562	bone morphogenetic protein antagonist noggin	128.969701290644	36.6696727111763	0.284327809898063	0.0392599613039514	118.738445720719	109.029388465343	0.91823156184634	1	196.270748409336	233.553634821381	1.18995640824831	1
Smp_156540	XLOC_032169	wnt related	3212.55287022545	145.703319116446	0.0453543723643748	0.000128404777277734	2026.05482967337	1804.25245356322	0.89052498833612	1	3136.03193486013	5642.24646969108	1.79916741502912	0.0814894646552082
Smp_212740	XLOC_032435	smad	3895.85491006826	1129.38435364641	0.289893843512418	0.012817160927922	3211.3780207225	1637.38783257525	0.509870785067796	0.114878423668505	5051.21494897478	4200.04543575014	0.831492121831521	0.925633568081123
Smp_165260	XLOC_023167	nedd-4-like e3 ubiquitin-protein ligase	4692.26529115271	1558.41303638597	0.332123812207371	0.0349236098698109	3863.32814133837	2006.85199961684	0.519461957720632	0.106683184073741	4580.8283166926	2921.2411735983	0.637710250557364	0.255431665628045
N.A.	XLOC_029466	zinc finger transcription factor gli2	6377.31174164101	1850.72768643516	0.290204989408113	0.0105306597720521	3981.89166610945	2977.21909005449	0.747689625861523	0.943809011479107	7661.59157839001	4613.97983982596	0.602222109155488	0.18397534542671
Smp_035260	XLOC_003827	epidermal growth factor receptor kinase substrate 8-like protein 1-like	7349.73942249714	372.05839684058	0.0506219847334629	6.07944063512915e-10	3565.01182562511	2794.78004050815	0.783946920012839	0.842475464122591	7563.05161829757	5842.02119457081	0.772442327437908	0.782190430480936
Smp_188160	XLOC_029763	mad mothers against decapentaplegic interacting protein	417.950293393105	108.30355499738	0.259130228425308	0.00922279439660463	196.017125723349	80.2725098844511	0.409517839771535	0.354297667910984	461.045653459899	170.956090573943	0.370800785759523	0.0542109822416723
Smp_099440	XLOC_020169	Noggin like protein	842.439906778779	8.30930627049474	0.00986338159390725	4.09013603410431e-16	825.723241536047	627.572996156693	0.760028257154606	0.93401980895621	1022.25553411112	1252.08194402445	1.22482285714713	0.95808020519643
Smp_134430	XLOC_025139	tolloid-like protein partial	3914.14889247468	507.769944763263	0.129726783194042	1.41909793869785e-05	1770.49618910423	1334.55335696147	0.75377363994027	0.973840694648818	5277.03394739592	4366.00008398692	0.827358726039923	0.975396435712816
Smp_127710	XLOC_021345	neurogenic locus delta protein	1656.58994787658	547.725688302581	0.330634439140872	0.0365668591237438	1089.26405785897	910.205225491831	0.835614852913542	0.93138395900909	1717.16124983791	1030.62041407476	0.600188487931488	0.154636823035103
Smp_145970	XLOC_012926	recombining binding protein suppressor of hairless	1472.97573949784	273.610416357071	0.185753511765475	0.000433674816718009	489.885869670562	794.55223091459	1.62191293953612	0.329056251144496	1809.33180156546	1308.02526323039	0.722932776674055	0.610650225368783
Smp_128230	XLOC_010435	protein jagged-1b	4128.07523321689	676.078826614167	0.163775800686491	0.000173902853650543	953.122515095456	723.112525289021	0.758677414326531	1	4177.51173498873	3174.78312465842	0.75996988783252	0.736627234481439
Smp_154760	XLOC_005613	egf-like domain protein	22895.1060333113	463.105082869898	0.0202272521558145	6.94739289582362e-15	9576.79316239625	5113.58355525798	0.533955726989773	0.80766372105853	33274.058004094	15028.4812398389	0.451657601786647	0.00504720615575271
Smp_128220	XLOC_008843	neurogenic locus notch homolog protein 2-like	3214.48809449929	95.7571233686413	0.0297892294367191	2.32539799012629e-12	353.727157623327	239.581964639369	0.677307239424609	0.982619138181207	3170.42367218384	1268.6963118123	0.400166174301367	0.00101442802716698
Smp_067260	XLOC_002601	transforming growth factor-beta receptor type i (TGF? receptor)	144.894286032356	94.6698721586466	0.653372018669569	0.69350131584389	841.14740183069	659.992844084183	0.784633992386782	0.895590017884939	111.757065419681	375.908263053715	3.36361966594296	0.000150112258798004
Smp_060220	XLOC_023893	PREDICTED: Lipopolysaccharide-induced tumor necrosis factor-alpha factor homolog (LPS-induced TNF)	31.9339168854061	13.1115785906352	0.41058472838411	0.624603482791534	1401.48044936704	1481.97148185866	1.05743286146301	1	11.3739707157272	205.074394305958	18.0301496664129	6.96546505582695e-15
Smp_022740	XLOC_009446	tumor necrosis factor alpha-induced protein 8-like	51.7411186958627	31.4729474283522	0.60827728935186	0.607022939236005	168.485628394601	91.1035007501035	0.540719713711931	0.313406872477375	23.2487849701308	97.6255918429286	4.19916963266486	0.00179012750936678
Smp_196930	XLOC_002043	wnt related	327.903678712938	365.864778472598	1.11576905726908	0.920636193944272	1306.30948150586	1060.76618363181	0.812032828858439	0.992601467323229	381.857619415517	942.18087496326	2.46736172609412	0.00276871936746486
Smp_123000.2	XLOC_008435	sno and ski oncogene family	2497.10686421317	3934.36845517375	1.57557071808117	0.590273150574245	4340.13694041693	5725.78930768771	1.3192646652153	0.732241152093526	3466.26507799367	7726.31026363119	2.22900155925273	0.00541223925570123
Smp_141250	XLOC_000641	Delta-like protein 1	35.4543330372516	71.0902566812062	2.00512181702903	0.319116779135017	25.5409029522838	139.21569637291	5.45069595358459	0.00398827833889957	56.3334687534749	127.089758296137	2.25602578907938	0.087528911024606
Smp_165470	XLOC_025923	epidermal growth factor receptor	3712.04509416296	1407.49294748578	0.379169140401609	0.0534220367033302	1745.70448315495	1370.82332876357	0.785255088699852	0.824453237582429	4581.07680194397	1969.2522059585	0.42986666478127	0.00244411553400372
Smp_168390	XLOC_007273	tnf receptor-associated factor 3	32.3292026256682	868.656007363287	26.8690823408557	5.28396595773911e-10	14.1318893875141	13.876842426767	0.981952380622755	1	26.3456611922745	58.0542903371492	2.20356171414566	0.285243317405044
Smp_196450	XLOC_000550	tnf receptor-associated factor 4	60.356706496595	1089.05124793337	18.0435830771317	2.44399473633201e-08	18.5654282880479	26.9888266658529	1.45371419646848	1	76.9062531455485	69.601223259243	0.90501383713909	1
Smp_060210	XLOC_026774	lipopolysaccharide-induced tumor necrosis factor-alpha factor homolog	2.66367502459564	51.6947015977521	19.4072854685416	0.000305385601447918	2.08670292489283	1.57120547582227	0.752960786645258	1	2.58418558797243	6.02253255991018	2.33053407152367	1
Smp_144390	XLOC_012174	tgf-beta receptor	2879.53780242562	18365.7994872284	6.37803729187291	0.00015015407543253	3995.24866800013	3664.37657073782	0.917183603635883	1	3390.23345940293	3942.5415670143	1.16291152636687	1
Smp_153600	XLOC_023411	cadherin egf lag seven-pass g-type receptor 1	13.5778355194031	543.299301300186	40.0136899967449	2.95325231081757e-11	7.39111100719224	2.85049618516054	0.385665454406886	0.966931672712965	11.8836995760248	20.1239700872761	1.69340952777669	0.94702005174977
N.A.	XLOC_023829	delta-like protein 1-like	0	145.069335386612	Inf	3.63233625288751e-12	0	0	NA	NA	0	1.37217476699359	Inf	1
N.A.	XLOC_010626	jagged protein	17.8644425692736	94.1793115179068	5.27188638283585	0.0099725868961706	19.3062309444395	31.7439321937799	1.64423249080228	1	27.3799277822383	35.6013618675252	1.30027230716877	1
Smp_052290	XLOC_014800	fibroblast growth factor receptor-like partial	63.1440165737783	396.37385327913	6.27729870202353	0.000603603767702981	431.794631124814	280.600754475852	0.649847715208719	0.550136702782416	100.821740991283	181.271967984677	1.79794522691638	0.702592963234594
Smp_139180	XLOC_006895	frizzled-like receptor	95.6752141900094	488.043023931842	5.10103926146009	0.00149069346124484	549.84314772281	441.799000789033	0.803500057459578	0.921467994963259	93.6203779218952	265.140110863461	2.83207691262109	0.225539907968757
Smp_122750	XLOC_010628	jagged protein	11.29725594382	109.188568600803	9.66505221655474	0.000329586733166729	6.19507551199146	31.4663441485368	5.07925110640366	0.171919489778227	21.2128313028141	43.7987091752775	2.06472717149583	0.476880488893972
Smp_093740.3	XLOC_025859	hepatocyte growth factor-regulated tyrosine kinase substrate	7886.32281215833	10054.1961810986	1.27489026515604	0.793060327009862	4798.15676509784	2184.47208858586	0.45527318000026	0.0365421415080692	9927.26687575369	4870.893590425	0.490658068468135	0.0162451178069461
Smp_070070	XLOC_015527	smad nuclear interacting protein	2013.94438427202	2431.64608024994	1.20740478199894	0.804392562249414	4880.42308121595	1580.05659513144	0.323754020673505	0.00103866934725255	1769.21814510545	2077.03406617056	1.17398415334858	1
Smp_137380	XLOC_004747	smad nuclear-interacting protein 1	910.500311319851	1284.19163451194	1.41042415751664	0.556966328822546	1580.696566105	746.503468050044	0.472262345637597	0.0490475195926127	724.846134906015	815.577910407181	1.12517384191188	1
Smp_000600	XLOC_029509	notchless homolog 1	2049.20020836909	1354.12859905647	0.660808345385731	0.587430726092319	3869.35368069264	1766.27802422459	0.456478825659693	0.0411823928969206	2219.74638800716	2073.90793321446	0.934299496744025	1

## Sheet: Sheet3_SteroidPathways
Ref (v5.2) IDs	CuffLinks IDs	NAME (Blast-to-GO annotation)	Cercariae				Schistosomula s#2				Adults
			Expression in male (rpkm)	Expression in female (rpkm)	FoldChange	Padj	Expression in male (rpkm)	Expression in female (rpkm)	FoldChange	Padj	Expression in male (rpkm)	Expression in female (rpkm)	FoldChange	Padj
Smp_168560	XLOC_014202	Steroid dehydrogenase	4589.3983058401	243.421208192065	0.0530398958578747	0.000974469592078241	1625.17881032894	998.1798964799	0.614196967211175	0.615567346262992	4401.43109710708	2459.99682747385	0.558908403471482	0.22957180510944
Smp_031180	XLOC_022172	Phosphatidylcholine-sterol acyltransferase?	995.864448573121	11.8536333814274	0.0119028582639047	0.000540491321863207	1171.33251836131	455.446454055699	0.388827635975535	0.216170144704017	684.663750138863	562.488737714117	0.821554723176206	0.936566410912551
Smp_139200	XLOC_006888	Nuclear hormone receptor nor-1	510.286191889718	34.3832908094514	0.0673804060465	1.21216803547964e-07	258.440029238796	319.732243817334	1.23716223357143	1	911.485650653444	765.965003386673	0.840347846219579	1
Smp_011000	XLOC_019699	Lipase 1 sterol esterase	1412.83553505992	83.055769544369	0.0587865802376259	7.7511431982391e-09	214.41289099017	332.869153840745	1.55246800835313	0.488649219919576	1284.92074490155	1092.76477231167	0.850453054515356	1
Smp_081430	XLOC_007239	Retinol dehydrogenase 11	6688.61861568322	361.290537813167	0.054015718128408	2.95925963368002e-08	6722.98613378024	4287.77099720349	0.637777754093408	0.36608217928989	7453.08088204408	4562.18281781735	0.612120395581448	0.171533245348804
Smp_212430	XLOC_010372	Nuclear hormone receptor	61.1078056897492	0	0	2.49172411179816e-06	11.3694170689168	9.85868717567045	0.867123364013395	1	90.9680715348276	44.2535811070157	0.486473774373385	0.248180192285916
Smp_058980.2	XLOC_016831	Oxysterol-binding protein 1	10537.4567170871	2937.77939864499	0.278793970643903	0.00913059264807259	8249.95258753872	4260.02609710928	0.516369767208591	0.248771071329878	12599.7651913337	8119.3595766364	0.644405626084288	0.265877661705836
Smp_212440	XLOC_010374	Nuclear hormone receptor	28.3502325004561	0	0	0.000256622191466033	4.17340584978566	3.19822677334568	0.766334952424992	1	35.1532169632715	17.5337641877947	0.498781212715588	0.621535962836096
Smp_134390	XLOC_022289	Sterol o-acyltransferase 1	487.887287528634	20.4082199722921	0.0418297842431369	2.62885117526031e-09	56.4512472495541	48.1944282920957	0.853735402497709	1	429.733325469113	318.897276863897	0.742081793437306	0.757862311859128
Smp_146950	XLOC_010670	Low-density lipoprotein receptor	714.707140650776	9.13550535644045	0.0127821660605239	9.66887777480446e-15	295.848061285862	74.2524403684268	0.250981669596546	0.796299983600516	1178.58144717124	303.504312050938	0.257516621171486	0.131676526500726
Smp_000260	XLOC_013930	Saposin containing protein	92583.1587500446	6629.37888126004	0.0716045873867621	2.78274615243086e-08	17711.007101781	12512.395072867	0.706475639751102	0.823480142113367	94944.3122136785	49853.5174112867	0.525081663650246	0.0371916989831579
Smp_144850	XLOC_021589	Oxysterol-binding protein 1	4941.47246475165	1276.72282227509	0.258368903476073	0.00499334852165814	1455.27398092004	1119.1452476502	0.769027181357747	0.832233254545527	5458.04632077101	2747.2946039168	0.503347616062136	0.0215837887162902
Smp_163610	XLOC_028219	Glutathione S-transferase	21982.5042494918	917.456137383619	0.0417357425237312	0.0489121474798608	1200.7612573458	682.121804983634	0.568074461772208	0.183364636100423	13748.8854949515	2080.02035814875	0.151286470377	6.03039314667134e-15
Smp_172730	XLOC_025257	Fatty aldehyde dehydrogenase	7840.94162336647	1842.95477936046	0.235042532885125	0.00367531499061895	7730.99947841126	2173.66602350453	0.281162355472209	8.54898821004118e-05	6179.71325729446	2941.75239251479	0.4760338012516	0.0107156877598162
Smp_175090.3	XLOC_022547	Long-chain-fatty-acid ligase	20151.9095909435	1997.6904276168	0.099131569571679	1.26771844869852e-06	7315.26518047894	2562.53205378968	0.350299270165611	0.00212011336744378	19717.0978799924	5316.73782040819	0.269651134906789	0.00171443242868842
Smp_166500	XLOC_029395	Phosphatidylcholine-sterol acyltransferase?	6648.90902827936	4976.51429786708	0.748470805766902	0.762314907190791	6881.79922904519	2101.41549740103	0.305358442968205	0.000263681066845486	6894.04608266591	3687.04697558686	0.534816119790295	0.0433381048689332
Smp_054160	XLOC_031085	Glutathione s-transferase	197229.748133632	25302.0419396019	0.128287148257466	0.262052144682729	67032.1909490983	21860.2119139249	0.326115133705307	0.000551127883188239	163869.510027717	44919.8250580932	0.274119481107226	0.0329657533413003
Smp_167200	XLOC_001919	ATPase family aaa domain-containing protein 3	1272.96327892895	1086.47079344426	0.853497356466082	0.922445564961481	4732.04939282137	1624.09796342822	0.343212386136969	0.0017561286292002	1451.87957770093	1562.66552480498	1.07630519004853	1
Smp_179370	XLOC_023760	Low-density lipoprotein receptor	1815.37492454348	3624.53704514701	1.99657767447597	0.185222521753315	9259.77469844267	3622.85453135415	0.39124650969785	0.00908615392881342	2279.30583601714	4009.07079305034	1.75889989386233	0.631919426527868
Smp_086190	XLOC_008361	Progestin and adipoq receptor family member vi	6811.68808854655	3881.02251651868	0.569759282290742	0.362358221566869	9219.13704988289	3504.50240960146	0.380133453992418	0.00425094811938327	6162.60901386251	4663.23021315001	0.756697399211971	0.830448347347471
Smp_102070	XLOC_018319	Glutathione s-transferase m1	26416.1822987167	10269.8259688971	0.388770256533093	0.571822903614344	27537.8242619583	13068.4684601967	0.474564306020718	0.0402313255636816	16079.9629846823	14641.4963306873	0.910542912607123	1
Smp_004220	XLOC_010130	Fatty-acid amide hydrolase 1	6984.1896274903	3612.4037919966	0.517225903743779	0.26812289696295	9375.39417651861	3999.18884089527	0.426562208009509	0.0193978979006785	7092.61045906957	6522.06918629566	0.919558352165762	1
Smp_139680	XLOC_024341	Retinol dehydrogenase 11	3.27604746029144	1.40711785152155	0.429516931173022	0.952112786445864	0	4.7136164274668	Inf	0.762341402367061	0	17.9924156054224	Inf	0.00414083504830681
Smp_000340	XLOC_013919	Ecdysone-induced protein 78c-like	94.1701143900796	38.2259632050117	0.405924570152573	0.485159609791538	28.4984750589423	44.3980452645411	1.55790950823559	0.850880050785335	162.925124771085	63.0091559131878	0.386736889118346	0.0198428233164063
Smp_131430	XLOC_020743	Steroid dehydrogenase	246.448855887769	166.77706642593	0.67672079801368	0.701137421477709	54.7858191865254	57.3712354810055	1.047191341352	1	265.199046222545	37.0524981947165	0.139715804873685	1.04051256409024e-09
Smp_178940	XLOC_019794	Steroid dehydrogenase	37.2763586394682	25.3754367384255	0.68073807809001	0.896687893904827	5.80487593586925	3.80996421716424	0.656338612445076	1	36.2171012919722	5.48869906797436	0.151549927304397	0.0136185409582021
Smp_016490.2	XLOC_016024	Saposin b domain-containing protein	50298.6221329756	1957.87515345461	0.0389250255857612	0.138935844408357	1594.97581816511	3341.59102004306	2.09507315533303	0.130541152549568	28764.5351503854	7530.31998663218	0.26179181924069	1.56592217931595e-07
Smp_039130	XLOC_031720	Niemann-pick c1	8193.40236377742	4930.08779629065	0.601714352280109	0.390741091472268	2435.95618593878	1895.62070670059	0.778183416287532	0.858576878647464	9420.05833280126	4054.4193681767	0.430402787853122	0.00230088882222595
Smp_130100	XLOC_009806	Saposin containing protein	37581.3628530804	486.64165563354	0.012949015647357	0.0928687979913318	3643.88301353546	6714.49419471867	1.84267556608629	0.513750970411743	28400.9454477802	8983.00825312661	0.31629257799334	1.17375501372266e-05
Smp_014570.2	XLOC_008031	Saposin containing protein	54244.5789251956	7565.77909884434	0.139475303316073	0.338140976928252	3680.17407621553	8638.50946201983	2.3473100139065	0.0556816620303371	33886.680556312	9918.29975963625	0.292690213287615	2.53879057849873e-06
Smp_105420	XLOC_008222	Prosaposin-like protein	128742.010394394	23441.3941145821	0.182080379534005	0.467749964843632	9405.63879499427	24398.8057264705	2.59406152609812	0.0146768909127299	86527.1493633481	25027.389449114	0.289243198617558	1.13886410313744e-06
Smp_033930	XLOC_034712	Phosphatidylcholine transfer protein	144.556465697956	1060.26061222541	7.3345775791224	3.33415946426265e-05	32.4767811206668	38.3915569381264	1.18212321582867	1	142.770254249224	88.6726443062058	0.621086267391637	0.422694455111577
Smp_156400	XLOC_002643	Cytochrome p450	66.5436990866574	712.223599235987	10.7030959957378	2.51254567406996e-06	1.32610202057485	1.7937232309955	1.35262838240601	1	51.1414033865404	6.86087383496795	0.134154977780168	0.108720534040673
Smp_016180	XLOC_003273	Nuclear hormone receptor	628.598876305123	2313.79695300046	3.6808798746203	0.0160097200777482	1289.04183578035	1596.17161238816	1.23826207038648	0.902622514120674	772.854817029907	1104.26675904657	1.42881526350613	0.570190422981916
Smp_099670	XLOC_007916	Lipoprotein receptor	52.8904050429003	337.936158155178	6.38936604628141	0.000296059791284454	265.93013148562	121.558288703092	0.457106112887645	0.646376831238989	39.8118592789187	42.5411972626909	1.06855590352238	1
Smp_099670	XLOC_007916	Lipoprotein receptor	52.8904050429003	337.936158155178	6.38936604628141	0.000296059791284454	265.93013148562	121.558288703092	0.457106112887645	0.646376831238989	39.8118592789187	42.5411972626909	1.06855590352238	1
Smp_120070	XLOC_024337	Retinol dehydrogenase 11	3.70441802391636	309.98174378362	83.6789319624093	2.52383287771799e-12	4.41374065260737	8.37045990076856	1.89645485758748	1	2.06557140605373	3.46802795463802	1.67896783644178	1
Smp_174750	XLOC_010596	Coup transcription factor	5.93972248488708	85.5501386058853	14.4030531432331	7.17684744689362e-05	14.0216211100665	8.77400631065484	0.625748352617783	1	6.72125194782729	4.76502064732352	0.708948375140714	1
Smp_196050	XLOC_031165	Low-density lipoprotein receptor	3.06186217847897	223.707263323065	73.0624862527925	1.43914782696946e-11	27.3024395637415	23.8056721453795	0.871924726352814	1	5.18614181918708	9.4905605145482	1.82998476428781	1
Smp_034860	XLOC_003869	Nuclear hormone receptor	8.60339750948272	243.097068853299	28.2559382598975	6.50755996461021e-09	32.7369141714149	206.306825006965	6.30196309666555	0.00024744514753116	14.4589998423761	59.6125305469683	4.12286680938036	0.0732013287528403

## Sheet: Sheet4_MobileElements
Ref (v5.2) IDs	CuffLinks IDs	NAME (Blast-to-GO annotation)	Cercariae				Schistosomula s#2				Adults
			Expression in male (rpkm)	Expression in female (rpkm)	FoldChange	Padj	Expression in male (rpkm)	Expression in female (rpkm)	FoldChange	Padj	Expression in male (rpkm)	Expression in female (rpkm)	FoldChange	Padj
N.A.	XLOC_008710	endonuclease-reverse transcriptase	0.826557717508259	30.1246440943083	36.4459050544251	0.00220055606298175	1.26106875788782	0.319822677334568	0.253612402443657	1	1.54695722413502	0.838341275057774	0.541929189752828	1
N.A.	XLOC_013270	endonuclease-reverse transcriptase	0	14.1242434794731	Inf	0.0193815070021539	0	2.5027655969754	Inf	1	0	1.79134540452248	Inf	1
N.A.	XLOC_000438	endonuclease-reverse transcriptase	1.22474487139159	30.1619372548868	24.6271186427717	0.00211755316346145	0	0.959468032003703	Inf	1	0	0	NA	NA
N.A.	XLOC_008213	reverse transcriptase	25.6714657709897	300.377199143339	11.7008199618576	4.99041596737441e-06	19.6313972578747	33.9555285559026	1.72965419169449	0.855030686648516	21.7136748414906	62.9696751330889	2.90000083324294	0.0694587611593705
N.A.	XLOC_020745	reverse transcriptase	0	13.1488717512137	Inf	0.0261051934164406	3.84823953635049	1.69641830883417	0.440829707405112	1	0	0.419170637528887	Inf	1
N.A.	XLOC_012761	endonuclease-reverse transcriptase	12.736186097024	215.770888658355	16.9415621768257	8.34688233877151e-07	6.5004435775002	20.6066998404025	3.17004518149006	0.613536641232008	25.3113946023108	24.3194559484546	0.960810588691715	1
N.A.	XLOC_007404	endonuclease-reverse transcriptase	14.7573052761823	132.61326188271	8.98627895817421	0.000187264076333088	21.5427986426328	32.8286130587955	1.52387874961744	1	11.3828560373483	37.7723971294778	3.3183585038362	0.116996868566526
N.A.	XLOC_028358	reverse transcriptase	0.826557717508259	29.7674842922031	36.0137999581448	0.00241925129032932	0	0.959468032003703	Inf	1	1.55288077188242	0.419170637528887	0.269930985764453	1
N.A.	XLOC_023740	tpa: reverse transcriptase	2.05130258889985	47.9639086839272	23.3821713790412	0.000289155492900051	1.39113528326189	0.417127599495899	0.29984689808013	1	0.518614181918708	0.953004129464703	1.83759751023177	1
N.A.	XLOC_027505	tpa: endonuclease-reverse transcriptase	6.19918288131194	56.875655076897	9.17470191891812	0.00726163997125572	3.97830606172456	20.7877284951156	5.22527130205368	0.334068414272657	7.7466332161699	7.05071876368298	0.910165560564516	1
N.A.	XLOC_023915	endonuclease-reverse transcriptase	3.30623087003303	60.7556206330356	18.376097441867	0.000399259302133167	0.695567641630943	21.0932244512092	30.3251951194142	0.102760362718122	5.68698535786358	13.0375500293839	2.29252393121717	0.871493635591292
N.A.	XLOC_005316	tpa_exp: reverse transcriptase	3.29113916516224	40.891026265741	12.4245813421036	0.00477872705528375	12.5654525641176	11.0821620633076	0.881954868458478	1	2.58418558797243	2.85901238839411	1.10634948267679	1
Smp_028210	XLOC_027655	endonuclease-reverse transcriptase	279.695166460171	1744.70196794503	6.23786957074025	0.000140322837451828	105.347358989597	106.731831775774	1.01314197906294	1	330.360803164132	267.561055184878	0.809905571793717	0.942898960195747
N.A.	XLOC_027779	tpa: endonuclease-reverse transcriptase	33.2793953957641	145.022019975575	4.35771197916756	0.0216927479116926	3.84823953635049	12.7921615617514	3.32415938272983	0.794595705103903	34.6553351984687	25.426603712425	0.733699546312527	1
N.A.	XLOC_032336	tpa: endonuclease-reverse transcriptase	5.34244175406208	59.2739164603572	11.0949111266003	0.00155407806950249	0.695567641630943	0.834255198991798	1.19938759232052	1	7.7525567639173	7.81387796443265	1.00790980348583	1
N.A.	XLOC_010161	gag-pol polyprotein	0.413278858754129	53.4962724119572	129.443525306925	5.73826811005948e-06	0	5.22804894912403	Inf	0.736041593971765	0.515652408045006	6.09771463421828	11.8252422350485	0.675821830158673
N.A.	XLOC_027370	endonuclease-reverse transcriptase	3.29113916516224	45.7521131033591	13.9016039150395	0.00211601038483965	0	4.67212732700661	Inf	0.746445678829292	1.03426658996371	5.60336192238129	5.41771529386623	0.817412374262916
N.A.	XLOC_029562	endonuclease-reverse transcriptase	0	11.0862488129594	Inf	0.0485342132748477	0	1.57120547582227	Inf	1	2.59010913571984	1.60150047580745	0.618313897944058	1
N.A.	XLOC_007332	gag-pol polyprotein	1.23983657626239	20.1844610088214	16.2799367233297	0.0360339940722522	0	2.6279784299873	Inf	0.98869143026708	3.62437572568355	6.67102890625292	1.84060081270817	1
N.A.	XLOC_005843	endonuclease-reverse transcriptase	0	16.2241595783058	Inf	0.0104609500941408	0	0	NA	NA	0	0	NA	NA
N.A.	XLOC_006229	endonuclease-reverse transcriptase	0	15.4940681704162	Inf	0.0125184356235095	0	0.834255198991798	Inf	1	0.518614181918708	0	0	1
N.A.	XLOC_020768	endonuclease-reverse transcriptase	0.826557717508259	28.136607477211	34.040705060539	0.00343330133842837	0	0.319822677334568	Inf	1	0	0	NA	NA
N.A.	XLOC_015863	endonuclease-reverse transcriptase	0	18.6439423186653	Inf	0.00502271876881532	0	0.639645354669135	Inf	1	0.518614181918708	0	0	1
N.A.	XLOC_010301	tpa: endonuclease-reverse transcriptase	0.413278858754129	18.5693559975084	44.931782993903	0.0157417171150076	3.47783820815472	4.61631150530546	1.32735085102041	1	2.07445672767483	4.42103208410273	2.13117585203046	1
N.A.	XLOC_017593	endonuclease-reverse transcriptase	36.6309013804095	179.362268071228	4.89647432392019	0.00763562518375525	38.3466903192231	48.8340736467648	1.27348861766786	0.997429399115178	50.1367545353137	34.0355626859271	0.678854525016258	0.978333883283245
N.A.	XLOC_016898	endonuclease-reverse transcriptase	0	15.4940681704162	Inf	0.0125184356235095	0	0	NA	NA	0	0	NA	NA
N.A.	XLOC_000133	endonuclease-reverse transcriptase	1.23983657626239	27.4065160693214	22.104942372277	0.00772314259529965	0	0	NA	NA	1.55288077188242	0	0	1
N.A.	XLOC_002764	reverse transcriptase	4.94425460017875	65.2380263116494	13.1947141858938	0.00077160836631548	0	3.879361228475	Inf	0.853405298628634	7.75848031166471	9.94921193217592	1.2823660733169	1
N.A.	XLOC_019330	reverse transcriptase	0	12.1362068623758	Inf	0.0354554484112621	2.58717077846267	6.72985741363553	2.60124204774549	0.999557115283074	0.518614181918708	5.29885413925933	10.2173336634476	0.715132799675478
N.A.	XLOC_034563	endonuclease-reverse transcriptase	291.942615174087	4153.35362418034	14.2266096428015	3.18460186671195e-08	7.45614426987928	12.8200694726019	1.71939664906853	1	264.194397371318	302.84110540452	1.14628133078418	1
N.A.	XLOC_030239	tpa: endonuclease-reverse transcriptase	48.0337992583251	210.686042857266	4.38620400864399	0.0160140676369558	54.5200476168695	130.231262433429	2.38868577937803	0.206888280310042	84.2142400743896	140.617881551468	1.66976370536925	0.417963163941879
N.A.	XLOC_014852	endonuclease-reverse transcriptase	0.612372435695794	23.6914949591757	38.6880492624668	0.00396600397559794	0	2.53067350782597	Inf	0.994377674059364	0.515652408045006	1.06766698387163	2.07051681949761	1
N.A.	XLOC_021122	endonuclease-reverse transcriptase	0.826557717508259	27.1612357489515	32.8606643838881	0.00425851872463486	1.26106875788782	1.27929070933827	1.01444960977463	1	3.09687622214374	2.85901238839411	0.923192334246742	1
Smp_051660	XLOC_028733	tpa: reverse transcriptase	145.099767073305	998.366152274098	6.88054965498133	0.000166462189826377	43.8263999416572	123.516477272666	2.81831219167201	0.0793634880254074	163.390427023277	174.273754379965	1.06660933296378	1
N.A.	XLOC_017537	tpa_exp: reverse transcriptase	21.0017632721066	88.0129640600432	4.19074164962793	0.0407599079857741	3.41280494546768	0	0	0.80766372105853	13.9551945298259	1.37217476699359	0.0983271687156274	0.144292572708594
Smp_081380	XLOC_031678	tpa: endonuclease-reverse transcriptase	1742.81953049797	538.937320497786	0.309233004947907	0.0326179652043364	1147.75677301866	1178.52825092759	1.02681010352742	1	1790.17360583527	1666.96761096125	0.931176510215314	1
N.A.	XLOC_034429	tpa: endonuclease-reverse transcriptase	0	15.4194818492594	Inf	0.012640554545962	0	1.69641830883417	Inf	1	0	10.9773981359487	Inf	0.0581121459679999
N.A.	XLOC_033915	reverse transcriptase	4.30169875474136	1880.43930992185	437.138771711807	4.00377879328413e-23	0.695567641630943	19.0075864537297	27.3267261386129	0.0883246369889934	2.06853317992743	15.2480660714353	7.37143895945155	0.185117241614766
Smp_203790	XLOC_023858	gag-pol polyprotein	0.826557717508259	32.2618533537195	39.0315796106485	0.00140830997185858	2.0216696622058	3.14241095164453	1.55436420221883	1	0.515652408045006	0	0	1
N.A.	XLOC_006865	endonuclease-reverse transcriptase	39.7380386735009	176.473446047028	4.44091988275979	0.0144062504160364	31.2609473775396	28.8662736294001	0.923397275225894	1	44.470501594566	26.6446348449129	0.599153009062723	0.759368316578443
N.A.	XLOC_008708	endonuclease-reverse transcriptase	0	21.7034583420783	Inf	0.00194992162298381	0	0	NA	NA	0	0.419170637528887	Inf	1
N.A.	XLOC_031437	endonuclease-reverse transcriptase	0	19.8645943672947	Inf	0.00339842799269956	1.26106875788782	0.319822677334568	0.253612402443657	1	0	0	NA	NA
N.A.	XLOC_004749	endonuclease-reverse transcriptase	0	17.593984269249	Inf	0.00678660690173128	0	1.6685103979836	Inf	1	0	0	NA	NA
N.A.	XLOC_003428	endonuclease-reverse transcriptase	0	42.0370919932135	Inf	1.06823647177481e-05	0	0.639645354669135	Inf	1	0	0	NA	NA
N.A.	XLOC_026736	gag-pol polyprotein	0	37.0798974775392	Inf	0.00155407816782872	2.71723730383674	2.43336858566464	0.895530391191347	1	0	0.419170637528887	Inf	1
N.A.	XLOC_009606	tpa_exp: pol polyprotein	0.413278858754129	42.9005842397376	103.805416926154	4.47869625677039e-05	0	5.99290713680507	Inf	0.608750153329612	0	1.48683762140052	Inf	1
N.A.	XLOC_028293	endonuclease-reverse transcriptase	17.5115305300027	235.427495865858	13.4441415878811	6.51855522844432e-06	6.82560989093537	53.8124424614964	7.88390243822183	0.201812193465157	21.1980224334456	35.6013618675252	1.67946618507935	0.791721098373646
N.A.	XLOC_006576	tpa: endonuclease-reverse transcriptase	23.8041650541607	92.8094868269637	3.89887595787535	0.0348068906155477	17.9999271717911	50.1405267353223	2.78559608918313	0.306035530140619	19.1561452183815	56.4960501273302	2.94923897701082	0.148597969669998
N.A.	XLOC_008811	tpa_exp: reverse transcriptase	0	56.3850944361572	Inf	5.69958600095542e-07	0	0.319822677334568	Inf	1	0	0	NA	NA
N.A.	XLOC_017856	tpa_exp: gag protein	0	25.7168247368515	Inf	0.000655133517938168	0	10.5119137199492	Inf	0.245337274098704	0	9.5657425888563	Inf	0.411340924217371
N.A.	XLOC_003036	TPA: hypothetical protein	0.413278858754129	75.8552358407682	183.544921870529	1.3196739838504e-07	0	0.319822677334568	Inf	1	0.515652408045006	0.838341275057774	1.62578756925848	1
N.A.	XLOC_030277	endonuclease-reverse transcriptase	10.2565129444992	104.162537317192	10.1557457081996	0.000229490522527888	2.78227056652377	10.3173038756265	3.70823168665339	0.772483840416594	7.7525567639173	14.2555811618717	1.83882319033398	0.94702005174977
N.A.	XLOC_005062	TPA: hypothetical protein	0	64.5982930285959	Inf	1.32891951971638e-07	0	0	NA	NA	0	0	NA	NA
N.A.	XLOC_020006	tpa: gag-pol polyprotein	0	61.2461812737754	Inf	2.1779240488931e-07	1.26106875788782	7.00819099050992	5.55734248959433	0.817267299191517	1.54991899800872	6.82517254075868	4.40356725062885	1
N.A.	XLOC_030500	tpa: endonuclease-reverse transcriptase	0	43.1616363637867	Inf	8.47066866955716e-06	0	0	NA	NA	0	0	NA	NA
N.A.	XLOC_005798	reverse transcriptase	0	21.3462985399731	Inf	0.00220316358753603	0	0.319822677334568	Inf	1	1.55288077188242	0.838341275057774	0.539861971528906	1
N.A.	XLOC_012200	endonuclease-reverse transcriptase	1.65311543501652	27.3104083912652	16.5205694731127	0.014272325554961	0	0.639645354669135	Inf	1	3.10872331763855	5.71802477678822	1.83934824445289	1
N.A.	XLOC_012813	tpa_exp: integrase	393.171554986349	56.363573079258	0.143356182217238	0.000162268907473758	205.350713401041	312.232309494598	1.52048319834576	0.57835362405962	439.261199799461	409.54733201745	0.932354900010344	1
N.A.	XLOC_011904	endonuclease-reverse transcriptase	0	250.201494878844	Inf	1.53970785671788e-15	0	4.44960957183337	Inf	0.773994506291994	2.06853317992743	1.90600825892941	0.921429869931444	1
N.A.	XLOC_005835	endonuclease-reverse transcriptase	0	26.3723298235842	Inf	0.0005585307762853	0	4.07397107279766	Inf	0.853405298628634	2.58122381409873	0.838341275057774	0.324784418336266	1
N.A.	XLOC_007919	endonuclease-reverse transcriptase	0	12.6425393067947	Inf	0.0304549770068562	0	0	NA	NA	0	0	NA	NA
N.A.	XLOC_025825	endonuclease-reverse transcriptase	16.042416967057	253.67698522184	15.8128906475105	1.07277246375073e-06	1.32610202057485	2.72528335214863	2.05510836260339	1	12.3904666624487	5.48869906797436	0.442977590554258	0.978333883283245
N.A.	XLOC_003177	tpa: endonuclease-reverse transcriptase	13.5627438145323	102.467096431502	7.55504179926413	0.00166530871715163	11.1290822660951	42.3259884566712	3.80318767034528	0.171318256864448	8.78089980613361	13.5319027412209	1.54106105752039	1
N.A.	XLOC_003591	reverse transcriptase	66.649341020753	263.191171737285	3.94889383310382	0.016702486815297	39.4776925517369	87.5311265409848	2.21723005786806	0.292189741580839	64.6253721164268	57.2478708704112	0.885842030700813	1
N.A.	XLOC_014354	endonuclease-reverse transcriptase	0	237.713877767583	Inf	3.10479144321788e-15	0	0	NA	NA	0	0.533833491935816	Inf	1
Smp_204490	XLOC_028581	tpa: transposase	0	201.475951179669	Inf	3.31001001540151e-14	11.7398183971126	17.8678352986443	1.52198566402346	1	0	1.79134540452248	Inf	1
N.A.	XLOC_029249	endonuclease-reverse transcriptase	0	110.030539490428	Inf	1.66928704278915e-10	0	0	NA	NA	0	0	NA	NA
N.A.	XLOC_030409	endonuclease-reverse transcriptase	69.3159174589699	0	0	5.29606650364379e-08	11.2393505435427	13.0704951386257	1.16292263400709	1	86.2413084200852	47.1877755697179	0.54715978263994	0.975086176481925
N.A.	XLOC_020121	reverse transcriptase	12.3379989431407	71.0529635206278	5.758872556893	0.0141178950015977	10.4787496392248	6.78567323533668	0.647565164639118	1	9.82701349159213	14.5995697250925	1.48565683130319	1
N.A.	XLOC_028778	tpa: endonuclease-reverse transcriptase	0	133.08230116655	Inf	1.22630533450701e-11	0	0.319822677334568	Inf	1	1.03722836383742	0	0	1
N.A.	XLOC_008718	tpa: gag-pol polyprotein	0	40.2728143395867	Inf	1.6218467945045e-05	2.52213751577564	0	0	0.916599549183452	2.58418558797243	2.02067111333634	0.781937304635216	1
N.A.	XLOC_030034	tpa: endonuclease-reverse transcriptase	107.449017225688	1.95074345651895	0.01815506094785	5.78375872131685e-07	53.7198502166986	26.9194296545421	0.50110768265274	0.52235205793426	86.3657029227807	52.4509284147679	0.607312007425727	0.584535666259012
N.A.	XLOC_022924	endonuclease-reverse transcriptase	5.95481418975788	59.7271839405185	10.030066772402	0.00237927348349919	2.08670292489283	4.74152433831737	2.27225652571551	1	4.64679522015246	9.22553351152508	1.98535400731999	1
N.A.	XLOC_007341	endonuclease-reverse transcriptase	56.6824718824202	253.720027935638	4.47616378590448	0.0118265631459091	57.607686248902	115.896548838337	2.01182440026475	0.325360070048285	48.1126479634918	97.7683970197657	2.03207267024573	0.195455770941846
N.A.	XLOC_002719	endonuclease-reverse transcriptase	0	34.6070497729221	Inf	6.48446794612658e-05	1.26106875788782	2.53067350782597	2.00676885538313	1	2.06853317992743	0.419170637528887	0.202641486052253	1
N.A.	XLOC_027930	reverse transcriptase	0	28.2111937983678	Inf	0.000334233843278026	0	0	NA	NA	0	0	NA	NA
N.A.	XLOC_006300	endonuclease-reverse transcriptase	12.7060026872824	0	0	0.0315126591254986	1.39113528326189	5.72890028117165	4.11814749442535	0.913817623358061	9.31136108354713	4.76502064732352	0.511742655511787	1
N.A.	XLOC_024623	endonuclease-reverse transcriptase	0	19.2463824411404	Inf	0.00397887236316487	0	0	NA	NA	0	0.419170637528887	Inf	1
N.A.	XLOC_034387	tpa: endonuclease-reverse transcriptase	0	16.8050783438817	Inf	0.00892342821853823	0.695567641630943	0	0	1	0	0	NA	NA
N.A.	XLOC_020120	endonuclease-reverse transcriptase	0.413278858754129	15.2487878500464	36.8970914602682	0.0379403420271436	0	0.834255198991798	Inf	1	2.06557140605373	0.953004129464703	0.461375543189483	1
N.A.	XLOC_010310	tpa: gag protein	11.894536674645	205.579675699278	17.2835379235496	6.13503218681798e-07	12.5004193014306	30.1312376174974	2.41041815405738	0.650746239413663	21.2098695289404	28.3607981751272	1.3371509964467	1
N.A.	XLOC_006382	endonuclease-reverse transcriptase	50.6551005819296	3.46974078977582	0.0684973625541194	0.00109735325852225	9.02258109327584	1.3765956314996	0.152572264773051	0.616145331413239	48.0534124860177	25.9604372043608	0.540241282799939	0.609069337779332
N.A.	XLOC_021128	endonuclease-reverse transcriptase	1.02565129444992	24.6453453305359	24.0289711170829	0.00786582835411084	0	2.55858141867654	Inf	0.987142435260038	1.03722836383742	0.838341275057774	0.80825139794305	1
N.A.	XLOC_026880	endonuclease-reverse transcriptase	2.86276860153731	39.0736836478566	13.6489144204229	0.00239848918849557	2.52213751577564	4.0045740614869	1.58776991200473	1	2.58418558797243	6.2123774886252	2.40399819484307	0.994207010362818
N.A.	XLOC_028866	endonuclease-reverse transcriptase	3.70441802391636	42.8790628828384	11.5751145270333	0.00522347205016028	4.8689734914166	14.933615380932	3.06709728595937	0.716132436968455	8.78386158000732	6.82139305486912	0.776582485133314	1
Smp_146410	XLOC_033381	tpa: endonuclease-reverse transcriptase	796.647214808667	3076.91189509043	3.86232680902477	0.00460317297180043	544.417194325247	700.043965040717	1.28585939668631	0.936660844746228	695.918946145621	846.863250508545	1.21689925989073	0.938241075775281
Smp_032790	XLOC_009189	uncharacterized transposon-derived protein partial	50.0247350277417	210.947094981315	4.21685581871313	0.0159652454604762	65.5445001244247	112.740556697083	1.72006127872003	0.542458432182513	58.375345968539	54.0129481104766	0.925269858607545	1
Smp_008860	XLOC_016466	endonuclease-reverse transcriptase	1881.44963327581	340.340169091858	0.180892521953558	0.000427660811503867	1355.98586553465	1144.17455630346	0.843795341371297	0.93138395900909	2432.72450214937	1924.1644707058	0.790950421638683	1
N.A.	XLOC_027549	rna-directed dna polymerase from mobile element jockey-like	3.30623087003303	30.4818038964135	9.21950253767638	0.0347954103494862	0.695567641630943	6.89655934710762	9.91500888531388	0.860479495089921	6.7330990433221	6.36652112313096	0.945555840210801	1
N.A.	XLOC_017463	tpa_exp: reverse transcriptase	32.2990192159266	4.76497915956204	0.147527054233661	0.0340776197784486	26.45700714881	22.122835026155	0.836180558962052	1	25.3084328284371	29.8438563106382	1.17920601852142	1
N.A.	XLOC_034069	reverse transcriptase	0	52.8192459683253	Inf	1.18603785573805e-06	0	0.959468032003703	Inf	1	2.58714736184614	0.953004129464703	0.368360976850062	1
N.A.	XLOC_000664	TPA: hypothetical protein	0	26.3350366630058	Inf	0.000560960707315689	0	0	NA	NA	0	0	NA	NA
N.A.	XLOC_028097	endonuclease-reverse transcriptase	0	21.42088486113	Inf	0.0021839980259874	2.78227056652377	9.64975061010683	3.46830057659109	0.828745789637139	0	0.419170637528887	Inf	1
N.A.	XLOC_029184	endonuclease-reverse transcriptase	0.612372435695794	264.447640090512	431.841187936617	7.11599256115331e-15	0	0	NA	NA	0	0	NA	NA
N.A.	XLOC_014738	endonuclease-reverse transcriptase	2.26548787071231	46.8178429564547	20.6656780474107	0.000704636608866691	0	4.54691449399471	Inf	0.766019382276246	3.61549040406245	10.8270339873325	2.99462390362509	0.794685440289795
N.A.	XLOC_018494	reverse transcriptase 1	1.23983657626239	19.7311935286601	15.914350251016	0.0424790164896166	3.15267189471955	3.14241095164453	0.996745318441731	1	4.14002813372856	2.32517889645829	0.561633597973695	1
N.A.	XLOC_019656	tpa: endonuclease-reverse transcriptase	0	55.7453611531037	Inf	6.6614206313096e-07	0	4.74152433831737	Inf	0.748569831926108	0	0.419170637528887	Inf	1
N.A.	XLOC_030233	endonuclease-reverse transcriptase	0	47.4733480431874	Inf	3.54481880160905e-06	0	0.959468032003703	Inf	1	0	0	NA	NA
N.A.	XLOC_028704	tpa: endonuclease-reverse transcriptase	0	46.1781096734012	Inf	4.74027909276255e-06	3.97830606172456	7.56411261262733	1.90134004153224	1	1.03722836383742	1.06766698387163	1.02934611228872	1
N.A.	XLOC_033063	endonuclease-reverse transcriptase	0	24.4961726882221	Inf	0.000950115735868912	0	0	NA	NA	0	0	NA	NA
N.A.	XLOC_023416	tpa_exp: reverse transcriptase	1.63802373014572	41.3600655495815	25.249979465134	0.000472751192161216	5.17434155692534	7.78663036780057	1.50485434371431	1	0.515652408045006	2.09585318764443	4.06446892314621	1
N.A.	XLOC_015294	tpa_exp: reverse transcriptase	0	132.890085810438	Inf	1.32368437453094e-11	1.39113528326189	0.736950276830467	0.529747383807627	1	0	0	NA	NA
N.A.	XLOC_002645	endonuclease-reverse transcriptase	0	79.5487355940147	Inf	1.09063070268388e-08	0	0	NA	NA	0	0	NA	NA
N.A.	XLOC_033356	tpa_exp: pol polyprotein	0	29.5810184893109	Inf	0.000229490522527888	1.89160313683173	1.05677295416503	0.558665257837877	1	1.54695722413502	1.37217476699359	0.887015326335763	1
N.A.	XLOC_013643	tpa_exp: pol polyprotein	0	22.8280027126515	Inf	0.00144692473836459	3.84823953635049	1.59911338667284	0.415544139487058	1	0.515652408045006	0.838341275057774	1.62578756925848	1
N.A.	XLOC_028055	rna-directed dna polymerase from mobile element jockey-like	0	20.8772592561326	Inf	0.00252616996247968	10.4787496392248	3.26762378465644	0.311833367258327	0.796299983600516	3.62141395180985	5.29885413925933	1.46320034378041	1
N.A.	XLOC_002807	endonuclease-reverse transcriptase	0.826557717508259	27.7048613539489	33.51836268309	0.00380104221495035	0	0.639645354669135	Inf	1	1.03130481609001	0.419170637528887	0.406446892314621	1
N.A.	XLOC_031219	endonuclease-reverse transcriptase	1.65311543501652	23.6169086380188	14.2863033867824	0.028377091185284	5.30440808229941	9.09382898798941	1.71439090788191	1	7.25171322524081	8.5375563850835	1.17731577627299	1
N.A.	XLOC_002106	tpa: reverse transcriptase	5.14334817712042	55.7453611531037	10.8383409470664	0.00253880614228634	7.13097795644411	11.0406729628474	1.54826911964721	1	3.10872331763855	15.7818995633711	5.0766497854043	0.296351745832328
N.A.	XLOC_029251	endonuclease-reverse transcriptase	0	175.70031192534	Inf	2.4532077408216e-13	0	0	NA	NA	0	0	NA	NA
N.A.	XLOC_024865	endonuclease-reverse transcriptase	0	30.6682696993057	Inf	0.000176259590754972	0	0	NA	NA	0.518614181918708	0	0	1
N.A.	XLOC_024238	reverse transcriptase	1.23983657626239	74.6933983096166	60.2445513704615	1.82135744731561e-06	0	0.959468032003703	Inf	1	0.515652408045006	3.92667937226574	7.61497340263176	0.920025859501821
Smp_140810	XLOC_000938	rna-directed dna polymerase from mobile element jockey-like	1908.06141830251	562.20281888692	0.294646080830605	0.0193230382105291	1020.06930067746	975.195643875534	0.956009207637046	1	1752.1101044039	1484.85730170152	0.847468031814527	0.994207010362818
N.A.	XLOC_011442	tpa_exp: reverse transcriptase	0	42.0155706363142	Inf	1.13676746257711e-05	0	0.736950276830467	Inf	1	0	3.69735366345188	Inf	0.722247159741267
N.A.	XLOC_005929	reverse transcriptase sr3-right	0	40.0648271797953	Inf	1.77556559509743e-05	0.695567641630943	0.319822677334568	0.459800971454995	1	0.518614181918708	0.419170637528887	0.80825139794305	1
N.A.	XLOC_000700	endonuclease-reverse transcriptase	2.05130258889985	45.9385789062513	22.3948329977437	0.000408496616473163	7.00091143107004	9.90017627613064	1.4141267710078	1	3.09983799601744	1.37217476699359	0.442660154742445	1
N.A.	XLOC_006111	endonuclease-reverse transcriptase	26.8358438228981	0	0	0.00535556263285321	5.67480941049519	10.2199989534652	1.80094135576853	1	25.2936239590686	12.2349100485354	0.483715187208227	1
N.A.	XLOC_007835	endonuclease-reverse transcriptase	65.8831501227279	242.298140677473	3.67769513488832	0.0293144443621817	43.7811649268966	89.2690339502792	2.0389826104293	0.367048373058756	103.856419962079	112.980761796992	1.08785534720188	1
N.A.	XLOC_026536	tpa: reverse transcriptase	0	14.6305759238921	Inf	0.0165822569272354	0	0	NA	NA	0	0.419170637528887	Inf	1
N.A.	XLOC_010386	endonuclease-reverse transcriptase	0	12.8290051096869	Inf	0.0297024926043019	7.32607774450521	8.13436095598571	1.11032959786521	1	0.518614181918708	6.67102890625292	12.8631825716224	0.523027877788813
N.A.	XLOC_033395	gag-pol polyprotein	0.826557717508259	22.5827223922816	27.321410125308	0.0126805735709227	1.39113528326189	0.417127599495899	0.29984689808013	1	0	3.62217158914378	Inf	0.828515603050832
N.A.	XLOC_031829	endonuclease-reverse transcriptase	63.0505649309322	0.506332444418957	0.008030577441671	0.0202447866941865	0.695567641630943	4.54691449399471	6.53698392773599	0.921355608899412	104.858107039432	16.8100857671439	0.1603126953343	0.177010064918375
Smp_156760	XLOC_001898	Tpa (Transposable element A): gag-pol polyprotein	8.20521035559939	2796.01485960216	340.760899285673	5.00159700363864e-23	13.5861865191837	20.2589692522174	1.49114464339288	1	5.68994713173728	12.5788986117562	2.21072328450889	0.877420168393571
N.A.	XLOC_032648	tpa_exp: reverse transcriptase	125.666371834233	1.44441101209999	0.0114940138003294	5.61881689261575e-06	127.806261828756	160.65441481741	1.25701520816458	0.98869143026708	92.5624171409419	95.2890744888016	1.02945749940506	1
N.A.	XLOC_013137	endonuclease-reverse transcriptase	0.413278858754129	23.3343351570705	56.4614779169062	0.00450958236918143	0	0.417127599495899	Inf	1	0.515652408045006	3.50750873473685	6.80207961800252	0.975513574380248
N.A.	XLOC_025292	endonuclease-reverse transcriptase	24.5221794239521	0	0	0.0372259624626168	0.695567641630943	4.2964888279709	6.17695328364706	0.953672715779945	25.3469358887953	19.8946443784623	0.784893466640155	1
N.A.	XLOC_029689	endonuclease-reverse transcriptase	1.02565129444992	37.4585786365436	36.5217485116453	0.000448620214344415	0.695567641630943	2.01624098616874	2.89869865343523	1	2.57826204022503	1.37217476699359	0.532209195801458	1
N.A.	XLOC_007638	endonuclease-reverse transcriptase	0.413278858754129	14.875856244262	35.9947186485821	0.0396504796241962	1.26106875788782	2.65588634083787	2.1060598989751	1	0.515652408045006	0.953004129464703	1.84815219437805	1
N.A.	XLOC_020919	endonuclease-reverse transcriptase	7.62302132964519	83.0772909012682	10.898210474394	0.000726762741679729	2.58717077846267	6.98028307965934	2.69803722961308	0.976803027207296	16.0296512575007	15.3232481457433	0.955931473466909	1
N.A.	XLOC_029493	reverse transcriptase	1.85220901195818	24.5922803662783	13.2772706576343	0.023078537632325	0	1.6685103979836	Inf	1	1.03426658996371	0.533833491935816	0.516146897826938	1
N.A.	XLOC_006830	endonuclease-reverse transcriptase	60.1454226284038	0.938078567681033	0.0155968405688453	5.00619754067864e-06	5.73984267318222	30.3258474618201	5.28339349848542	0.427389932655962	56.8817006741306	30.1126627995509	0.529391042157182	0.51431885789462
N.A.	XLOC_000541	endonuclease-reverse transcriptase	53557.2927841179	17.2210526634646	0.000321544495030401	0.000348346086701657	11176.5518539072	8402.44979583109	0.751792673237918	0.828745789637139	37368.6794112412	42231.0095465999	1.13011779415186	1
N.A.	XLOC_018636	tpa: endonuclease-reverse transcriptase	1433.13669244396	328.945552743812	0.229528386565035	0.00365492233120884	299.710333687732	127.074524760544	0.423991135697517	0.167202199933155	982.34624004839	574.851334995931	0.58518199750794	0.553006753889522
N.A.	XLOC_027497	endonuclease-reverse transcriptase	101.554569855413	4.87685864129736	0.0480220500981956	7.51196513226293e-06	73.6764137880085	43.8557048320333	0.59524755043345	0.676031065381765	111.241413011636	74.9433376644908	0.673699979491013	0.695202477693158
N.A.	XLOC_025872	endonuclease-reverse transcriptase	17.6502572874612	0.469039283840516	0.0265740762982375	0.0187865951190444	2.78227056652377	2.11354590833007	0.759647869535125	1	10.8612800815558	6.97553668937488	0.642238910791043	1
N.A.	XLOC_008730	reverse transcriptase	7.5928379199036	43.9132491285755	5.78350935339511	0.0286719804161319	7.52117753256631	21.9697142822925	2.92104716145374	0.568979201299436	6.72125194782729	14.1409183074648	2.10391135717446	0.857376815819527
N.A.	XLOC_015889	endonuclease-reverse transcriptase	4.95934630504955	103.320566427567	20.8335050775477	1.64728033748183e-05	3.47783820815472	8.13436095598571	2.3389129882214	0.956742519320929	7.2369043558723	4.2311871553877	0.584668104941079	1
N.A.	XLOC_034098	tpa_exp: pol polyprotein	38.9898408939679	367.353709054477	9.42178015174486	1.44758518391119e-05	9.67291372014617	18.6741825867855	1.93056437047422	0.867376916323092	33.1083779743337	50.7704663787628	1.53346281168232	0.797106966339134
N.A.	XLOC_015952	tpa_exp: reverse transcriptase	0.612372435695794	82.378743100737	134.523924165751	5.24821708016367e-08	0	1.57120547582227	Inf	1	0	4.1560050810796	Inf	0.826957715322233
N.A.	XLOC_029662	endonuclease-reverse transcriptase	0.413278858754129	25.9248118966429	62.7295864462941	0.00572108003807131	1.39113528326189	4.12978689449881	2.96864506578787	1	2.06853317992743	2.97367524280104	1.43757676775838	1
N.A.	XLOC_007577	endonuclease-reverse transcriptase	2.06639429377065	61.1127804351408	29.5745979454993	6.94639265776562e-05	0	6.04872295850621	Inf	0.58661052670892	1.03130481609001	5.06952843044547	4.91564506569996	0.877420168393571
N.A.	XLOC_030232	endonuclease-reverse transcriptase	0	16.1122800965705	Inf	0.0106191234685737	0	0	NA	NA	0	0	NA	NA
N.A.	XLOC_030814	endonuclease-reverse transcriptase	0	15.1369083683111	Inf	0.0142846477881737	0	0	NA	NA	0	0.838341275057774	Inf	1
N.A.	XLOC_020699	endonuclease-reverse transcriptase	0.413278858754129	72.2736155692571	174.878569368714	2.24029654125576e-07	0	0.736950276830467	Inf	1	1.03130481609001	1.37217476699359	1.33052298950365	1
N.A.	XLOC_029684	endonuclease-reverse transcriptase	0	49.989238461603	Inf	2.00499241029507e-06	6.43541031481316	9.23262301061093	1.43465957242215	1	3.61549040406245	2.32517889645829	0.643115770365666	1
N.A.	XLOC_019856	endonuclease-reverse transcriptase	0	21.3835917005515	Inf	0.00219427669492395	0	0.319822677334568	Inf	1	0	0	NA	NA
N.A.	XLOC_017341	tpa: endonuclease-reverse transcriptase	0	11.1981282946947	Inf	0.0478273884728421	0.695567641630943	0	0	1	1.55288077188242	0	0	1
N.A.	XLOC_017345	endonuclease-reverse transcriptase	0.413278858754129	17.4075184663568	42.1205152347581	0.0207120122676204	2.0216696622058	5.89560221464374	2.91620452384451	0.989798214441466	0	0.953004129464703	Inf	1
N.A.	XLOC_007477	endonuclease-reverse transcriptase	1.43893015320405	28.39765960126	19.73525923967	0.00660329100999022	0	0.639645354669135	Inf	1	1.54991899800872	2.97367524280104	1.91860042145526	1
N.A.	XLOC_033594	endonuclease-reverse transcriptase	0	46.8393643133539	Inf	3.74762017686691e-06	0	0	NA	NA	0	0.533833491935816	Inf	1
N.A.	XLOC_019186	tpa: endonuclease-reverse transcriptase	0	12.5306598250594	Inf	0.0308824069078616	0	0	NA	NA	0	0	NA	NA
N.A.	XLOC_024012	tpa_exp: reverse transcriptase	1.02565129444992	28.5095390829954	27.7965223046743	0.00326026038155571	3.41280494546768	12.2641478504845	3.59356835402261	0.711887767957453	2.58714736184614	3.46802795463802	1.34048334694136	1
N.A.	XLOC_024357	endonuclease-reverse transcriptase	13.3183751229782	0	0	0.0265127675463849	7.56641254732691	9.28843883231207	1.22758820963225	1	17.6003026726254	29.3889843789	1.66979994182772	0.861001909195868
Smp_154270	XLOC_020467	tpa: endonuclease-reverse transcriptase	2001.87688851322	482.025849116292	0.240786959419012	0.00368440203163742	1504.52633425926	2224.65380271707	1.47864065391209	0.551864408229069	2447.31199751806	2259.26200248363	0.923160596104973	1
N.A.	XLOC_002766	endonuclease-reverse transcriptase	10.6848835081242	116.447916821882	10.898379634494	0.000146610307927699	0	4.4217016609828	Inf	0.787271812509163	16.5216094745561	10.5582274984198	0.639055626794708	1
N.A.	XLOC_016554	tpa: endonuclease-reverse transcriptase	0	39.0521622909574	Inf	2.23668141115952e-05	0	0.319822677334568	Inf	1	0	1.79134540452248	Inf	1
N.A.	XLOC_004697	reverse transcriptase	0	29.1492723660489	Inf	0.000258969064222593	0	0	NA	NA	0	0	NA	NA
N.A.	XLOC_004432	endonuclease-reverse transcriptase	0	25.8659973791653	Inf	0.000644329678546616	0	1.59911338667284	Inf	1	0.515652408045006	0	0	1
N.A.	XLOC_001679	endonuclease-reverse transcriptase	16.0575086719278	0	0	0.00792878848094667	1.39113528326189	2.11354590833007	1.51929573907025	1	14.4915793549868	5.37403621356743	0.370838545746094	0.728143271396542
N.A.	XLOC_029258	tpa: endonuclease-reverse transcriptase	1388.55597041723	10.1854634058568	0.00733529193122574	6.63205457436973e-05	591.268955463954	378.250847389984	0.639727223786304	0.537157380561128	977.008744007623	740.162489302708	0.757580209841942	0.791696563164318
N.A.	XLOC_015950	endonuclease-reverse transcriptase	0	19.0011021207705	Inf	0.00443048704452021	0	0	NA	NA	0	1.06766698387163	Inf	1
N.A.	XLOC_004058	endonuclease-reverse transcriptase	0	17.4448116269352	Inf	0.00691573426101373	0	0.319822677334568	Inf	1	0	0	NA	NA
N.A.	XLOC_003038	Endonuclease-reverse transcriptase putative	10.27160464937	2361.27325475561	229.883580546534	5.53536729108744e-21	16.1733572976464	12.0695380061619	0.746260518706173	1	17.573646707762	23.3231915530015	1.32716856898574	1
N.A.	XLOC_019411	endonuclease-reverse transcriptase	45.8919464402004	0.975371728259473	0.0212536578619613	0.00049528774763145	2.78227056652377	15.4480479025892	5.55231690564528	0.448224286643935	74.9324967295795	39.2987155309771	0.524454906030964	0.411136426398914
N.A.	XLOC_010575	endonuclease-reverse transcriptase	19.9610202727859	0.506332444418957	0.0253660603265491	0.00792968485598491	41.6548655061509	26.0436853550901	0.625225529806223	0.843235859720148	9.29062866643122	9.15035143721697	0.984901212366705	1
N.A.	XLOC_026338	endonuclease-reverse transcriptase	33.3548539201181	186.189870169044	5.58209220807719	0.00375111693537823	30.0451136344124	45.1357410730029	1.50226561371052	0.977527581192254	51.7577561062912	95.6763233180108	1.84854078916264	0.341819513164637
N.A.	XLOC_012573	endonuclease-reverse transcriptase	1.65311543501652	104.013364674878	62.9196016634127	1.09613782433829e-07	6.56547684018723	5.6730844594705	0.864078055190995	1	2.59307090959354	0.953004129464703	0.367519502046354	1
N.A.	XLOC_030256	reverse transcriptase	1.02565129444992	41.3973587101599	40.3620206342762	0.000202176058121243	0	1.15407787632637	Inf	1	0.518614181918708	0.419170637528887	0.80825139794305	1
N.A.	XLOC_014133	tpa_exp: orf3	107.811218142587	7.76568066549734	0.0720303582436731	0.000688259237728966	48.785843462595	30.1455643387384	0.617916227314006	0.79573809752501	88.7840291738258	29.9942204592544	0.337833512832924	0.93945685477112
N.A.	XLOC_031468	endonuclease-reverse transcriptase	0.413278858754129	23.9152539226463	57.8671117964786	0.00395900778543049	0	0	NA	NA	1.55584254575612	0	0	1
N.A.	XLOC_027369	endonuclease-reverse transcriptase	3.5053244469747	88.7803486285113	25.3272842418721	1.12788573198194e-05	1.39113528326189	22.984252604366	16.5219392254025	0.133778803108593	5.16244762819747	15.2480660714353	2.95365051030248	0.630660946884245
N.A.	XLOC_032637	reverse transcriptase	45.8768547353296	1.01266488883791	0.0220735465558859	4.76985808473118e-05	16.0885257870329	19.9391465748828	1.23933956652221	1	28.9446556496155	44.7911940848411	1.54747717945078	0.874587826108952
Smp_008360	XLOC_001961	pro-pol polyprotein	222.071790685283	695.153196070817	3.13030841929842	0.0331116889149944	77.5048550764325	151.227181962477	1.95119624200757	0.519113399426109	227.624541234354	218.262308483958	0.95886984461505	1
N.A.	XLOC_025972	reverse transcriptase	54.2660669629999	322.204036073593	5.93748642762853	0.000922487222346119	3.91327279903753	13.293012893799	3.39690422223271	0.736041593971765	74.9532291466954	37.0881994889258	0.494817900591558	0.318628294538403
N.A.	XLOC_027628	endonuclease-reverse transcriptase	0	13.1861649117921	Inf	0.0259900735011466	0	1.98833307531816	Inf	1	0	0	NA	NA
N.A.	XLOC_033123	tpa_exp: reverse transcriptase	0.413278858754129	30.8174423416195	74.5681558319285	0.000743765406836048	0	0.319822677334568	Inf	1	0	0	NA	NA
N.A.	XLOC_011766	tpa: gag-pol polyprotein	14.8176720956655	151.998794715705	10.2579402307174	0.000164710761399041	3.28273842009362	12.6533675391298	3.85451593147924	0.702576012223999	12.3934284363224	16.3157330553069	1.31648261327666	1
N.A.	XLOC_030177	tpa: endonuclease-reverse transcriptase	0	15.6805339733084	Inf	0.0122493911286923	0	0.319822677334568	Inf	1	1.03426658996371	0	0	1
N.A.	XLOC_016903	endonuclease-reverse transcriptase	3.91860330572883	169.043403826736	43.1386875981047	1.42986313941587e-08	0	2.01624098616874	Inf	1	6.72421372170099	4.2311871553877	0.6292463818829	1
N.A.	XLOC_001588	reverse transcriptase	8.22030206047019	134.30295321518	16.3379584140851	8.16403896816177e-06	6.13004224930442	16.3381189232822	2.66525388550724	0.751586167891782	5.68698535786358	17.0394114759577	2.99621159607819	0.553843381184099
N.A.	XLOC_033413	reverse transcriptase	93.3615497910634	475.465048695745	5.09272874925279	0.00215762925932679	86.1315980746784	191.802427351875	2.22685322970064	0.149945234087891	110.13310207483	126.168675974992	1.14560176366653	1
N.A.	XLOC_022627	gag-pol polyprotein	0	30.2365235760437	Inf	0.000199085660873857	3.47783820815472	0	0	0.880036792820632	0	1.25751191258666	Inf	1
N.A.	XLOC_031120	tpa_exp: pol polyprotein	0	25.1731991318541	Inf	0.000752526121162157	0	0	NA	NA	0	0	NA	NA
N.A.	XLOC_006918	endonuclease-reverse transcriptase	90.0100438064179	16.0376937754136	0.178176713366627	0.00685488516057661	15.1724215905067	62.9047803862231	4.14599475838335	0.090045755844504	79.6651833920693	79.5542146773085	0.998607061327975	1
N.A.	XLOC_030176	endonuclease-reverse transcriptase	0	44.04090041399	Inf	7.34113833637563e-06	3.34777168278065	5.2559568599746	1.56998665321436	1	0.518614181918708	1.37217476699359	2.64584890817482	1
N.A.	XLOC_016422	reverse transcriptase	0	17.8177432327196	Inf	0.0124324419343131	0	0	NA	NA	0	0.419170637528887	Inf	1
N.A.	XLOC_027463	tpa_exp: pol polyprotein	15.8282316852446	235.60821211553	14.8853148475941	1.95760497079645e-06	1.39113528326189	0.319822677334568	0.229900485727498	1	7.2457896774934	1.37217476699359	0.189375461898347	0.703798862833713
Smp_122680	XLOC_003122	endonuclease-reverse transcriptase	2497.16489248559	517.064645012476	0.207060673713784	0.00101150014357598	1393.8264494814	874.068990611182	0.627100304300007	0.362133033547353	2824.05751946124	1794.80709643579	0.635541976063643	0.272825886455451
N.A.	XLOC_033066	endonuclease-reverse transcriptase	0	23.297041996492	Inf	0.00127053830161619	0	0	NA	NA	0	0	NA	NA
N.A.	XLOC_007353	gag-pol polyprotein	1.65311543501652	28.2857801195247	17.1105898114381	0.0118265631459091	0.695567641630943	1.7937232309955	2.5787905066855	1	2.07149495380113	1.37217476699359	0.66240796989425	1
N.A.	XLOC_028528	endonuclease-reverse transcriptase	55.9975423359917	0.506332444418957	0.00904204762024919	3.3978828572464e-06	15.2176566052673	10.2758147751664	0.675256055627486	1	53.2780573655629	19.5149545210322	0.36628502400401	0.160339831898558
N.A.	XLOC_020298	reverse transcriptase	0.612372435695794	24.1605342430162	39.4539872056199	0.00352624340050013	0	1.27929070933827	Inf	1	2.07149495380113	6.55636605184599	3.16504080293088	0.921434221427153
N.A.	XLOC_020770	endonuclease-reverse transcriptase	1.02565129444992	38.9029896486436	37.9300351485521	0.000332630999067888	7.82654559807505	5.3811696929865	0.687553611686618	1	0	5.41351699366626	Inf	0.469268128829607
N.A.	XLOC_019560	endonuclease-reverse transcriptase	38.2236499959428	1.01266488883791	0.0264931498939897	0.000284875452777874	38.91219143548	90.6041404813186	2.32842554322721	0.237576324728832	41.8833542327199	27.4829761199706	0.656178967120559	0.89774404230053
N.A.	XLOC_026735	tpa: endonuclease-reverse transcriptase	45.3881173522215	149.930422224231	3.3032967871467	0.0479007773495421	47.4795396899466	101.505273889913	2.13787400957904	0.310779704163785	42.3723506759016	47.9114539903687	1.13072447542112	1
N.A.	XLOC_010211	TPA: hypothetical protein	15.6744132229153	90.0913588019767	5.74767026495557	0.0133271049668596	6.19507551199146	20.3849276168606	3.29050510803342	0.828488510451696	12.9238897137359	16.8100857671439	1.30069863945664	1
N.A.	XLOC_019564	reverse transcriptase	70.0763055297524	406.011418382751	5.79384736842855	0.00153256781255171	70.3088438573014	124.058072173542	1.76447322082738	0.543225433226055	59.9282267404214	108.065377001052	1.80324669824015	0.352051981837175
N.A.	XLOC_020700	reverse transcriptase sr3-right	11.2670725340784	114.230371688094	10.1384251625782	0.000137871963359679	0	4.19918390580957	Inf	0.817267299191517	10.3397041257634	6.55636605184599	0.634096099085611	1
N.A.	XLOC_009684	endonuclease-reverse transcriptase	16.3169690683527	166.474448444063	10.2025350263699	0.00019095961248998	27.3929095932627	73.7780058839671	2.69332491434619	0.345386434505375	13.9433474343311	19.0206018091952	1.36413453790609	1
N.A.	XLOC_025818	tpa: endonuclease-reverse transcriptase	37.2583655209761	4.48240567861373	0.120306020297379	0.0372489852414238	2.58717077846267	2.43336858566464	0.94055197512341	1	51.6452086990906	4.72553986722469	0.0915000633409755	0.215089241056817
N.A.	XLOC_003258	endonuclease-reverse transcriptase	1.23983657626239	54.4716441402167	43.934535553409	4.4043022691326e-05	1.39113528326189	3.55953855114043	2.5587292580159	1	0	3.04885731710914	Inf	0.826569852336386
N.A.	XLOC_023267	retrovirus-related pol polyprotein from transposon	1.85220901195818	23.2224556753351	12.5377079613623	0.0305161693206748	2.65220404114971	1.98833307531816	0.749690839946176	1	2.58714736184614	2.55450460527215	0.987382722354597	1
N.A.	XLOC_004845	tpa_exp: reverse transcriptase	2.26548787071231	24.7787461691705	10.9374878980833	0.0344428094203817	7.89157886076208	6.75776532448611	0.856326147621303	1	6.71829017395359	9.53004129464703	1.41852183336683	1
N.A.	XLOC_003841	tpa: endonuclease-reverse transcriptase	0	11.7417538996921	Inf	0.0407316083107153	0	1.27929070933827	Inf	1	0	5.52817984807319	Inf	0.4630770260301
N.A.	XLOC_014736	tpa: endonuclease-reverse transcriptase	1.43893015320405	31.0627226619894	21.5873735030309	0.00368112629370603	0.695567641630943	4.61631150530546	6.63675425510205	0.929482718554801	1.54695722413502	6.86087383496795	4.43507663167882	0.775205111773342
N.A.	XLOC_003586	gag-pol polyprotein	20.1601138497275	98.6029026790429	4.89098937704538	0.017450442850459	7.76151233538802	10.3173038756265	1.3292904049879	1	13.964079851447	19.9379046444507	1.42779938646546	1
N.A.	XLOC_018537	endonuclease-reverse transcriptase	0	11.7417538996921	Inf	0.0407316083107153	0	0	NA	NA	0	0	NA	NA
N.A.	XLOC_002220	endonuclease-reverse transcriptase	1.43893015320405	78.5202989014976	54.5685269897619	1.04558346581777e-06	0	11.4992896628035	Inf	0.19320137332582	3.62437572568355	8.34771145636847	2.30321359819672	0.966052647798053
N.A.	XLOC_009410	reverse transcriptase	13.5778355194031	64.6355861891743	4.76037481061016	0.0369686525208525	10.933982478034	25.0148203117757	2.28780504834626	0.683303852303583	11.8748142544037	17.1540743303647	1.44457622349783	1
N.A.	XLOC_002722	endonuclease-reverse transcriptase	0	23.8406676014894	Inf	0.00109982643595802	0	0	NA	NA	0	0	NA	NA
N.A.	XLOC_027774	endonuclease-reverse transcriptase	0	14.1615366400516	Inf	0.0192615833012289	0	0	NA	NA	5.16540940207117	0.533833491935816	0.103347760144969	0.68729186944475
N.A.	XLOC_020401	tpa: gag-pol polyprotein	0.413278858754129	85.2890864818362	206.371762492155	3.32532395841129e-08	25.8717077846267	11.6659915962756	0.450916951188187	0.752801142208928	3.10279976989114	8.99620780271121	2.89938393382917	0.855513469222904
N.A.	XLOC_019238	endonuclease-reverse transcriptase	4.92916289530795	47.4948694000867	9.63548383545952	0.00519889187477589	10.4787496392248	12.69485663959	1.21148582384961	1	2.06853317992743	7.05071876368298	3.4085596654197	0.834490349917562
N.A.	XLOC_001705	endonuclease-reverse transcriptase	0	41.2854792284246	Inf	1.30261391702829e-05	0	0.834255198991798	Inf	1	0	0	NA	NA
N.A.	XLOC_024256	tpa_exp: orf3	0.413278858754129	43.9663140928332	106.384135460919	3.85320284444386e-05	3.15267189471955	5.32535387128536	1.68915575395107	1	0.518614181918708	0	0	1
N.A.	XLOC_015528	endonuclease-reverse transcriptase	2.05130258889985	49.4083196960272	24.0863146974946	0.000225692814788203	3.47783820815472	8.87131123281618	2.55081194174445	0.921355608899412	4.65568054177356	7.28004447249684	1.56369072301587	1
N.A.	XLOC_028971	endonuclease-reverse transcriptase	0	41.2854792284246	Inf	1.30261391702829e-05	0	0	NA	NA	0	0	NA	NA
N.A.	XLOC_030491	tpa: endonuclease-reverse transcriptase	0.826557717508259	19.5074345651895	23.6008135330181	0.0255871183062326	0	0.834255198991798	Inf	1	0	0	NA	NA
N.A.	XLOC_024414	endonuclease-reverse transcriptase	11.4963495207616	0	0	0.04113363406893	0	1.15407787632637	Inf	1	19.1146803841497	4.53569493850966	0.237288557661198	0.289201958234617
N.A.	XLOC_005796	reverse transcriptase	0	18.9638089601921	Inf	0.00445204997304799	0	0	NA	NA	0	0.838341275057774	Inf	1
N.A.	XLOC_021575	endonuclease-reverse transcriptase	0	13.9377776765809	Inf	0.0198867554347384	0	0	NA	NA	0	0	NA	NA
N.A.	XLOC_019562	endonuclease-reverse transcriptase	11.4963495207616	0	0	0.04113363406893	11.5645168569779	19.7724446414107	1.70975103291758	0.94531247031441	10.8642418554296	8.34771145636847	0.768365760579657	1
N.A.	XLOC_007535	endonuclease-reverse transcriptase	40.673139738726	188.193678589821	4.62697691397146	0.00738006860256653	15.9132242468982	35.2212380756313	2.21333134813936	0.601023738770047	54.33897992039	61.4395772457	1.13067226023957	1
N.A.	XLOC_018397	tpa: reverse transcriptase	0	17.2741176277222	Inf	0.00767845912188301	0.695567641630943	0.319822677334568	0.459800971454995	1	1.03130481609001	0.419170637528887	0.406446892314621	1
N.A.	XLOC_030299	endonuclease-reverse transcriptase	4.95934630504955	243.432707298505	49.0856440193832	8.86867266731373e-10	2.78227056652377	4.54691449399471	1.634245981934	1	10.3367423518897	11.5864137021926	1.12089605291114	1
N.A.	XLOC_026330	tpa: endonuclease-reverse transcriptase	12.5220008152115	0	0	0.0299994137583134	0	0	NA	NA	8.2593238503412	0.533833491935816	0.0646340428840023	0.544818792895464
N.A.	XLOC_033469	endonuclease-reverse transcriptase	25.6412823612481	2.88882202419998	0.112662930952544	0.0423088281870097	3.78320627366346	2.40546067481406	0.635825937263723	1	13.9729651730681	14.4097247963775	1.03125747598306	1
N.A.	XLOC_016980	tpa: endonuclease-reverse transcriptase	527.920772835544	1674.9642872951	3.17275692391988	0.0198246029406269	328.918536117324	415.749351180892	1.26398881646669	0.949111395467776	422.822519993368	498.319521234505	1.17855482542018	1
N.A.	XLOC_000436	reverse transcriptase	617.753202233898	111.43765734195	0.18039187322538	0.000652792496535637	81.6980591741446	179.744233940429	2.20010408762946	0.761330245880463	541.200137049171	432.746615823062	0.799605517808183	0.875842990368761
N.A.	XLOC_012960	endonuclease-reverse transcriptase	26.4527483738856	0	0	0.000547914500509677	37.390989626844	9.34425465401322	0.249906588385794	0.232282827798151	37.2632149774307	29.8871165766266	0.802054159704909	1
N.A.	XLOC_014620	endonuclease-reverse transcriptase	160.716714890358	0	0	3.49743125039998e-13	0	1.15407787632637	Inf	1	156.035051712457	146.493829448652	0.93885205818121	1
N.A.	XLOC_015771	endonuclease-reverse transcriptase	16.8538829796945	0.469039283840516	0.0278297460831793	0.0206536536189555	0.63053437894391	6.60464458062363	10.4746779893046	0.757515825178889	11.8866613498985	3.04885731710914	0.256494000069682	0.610650225368783
N.A.	XLOC_034311	gag-pol polyprotein	494.584496670683	164.272675113954	0.332142791008944	0.0392553148139732	298.893220730838	360.311378485134	1.20548528201516	1	543.585580033585	563.103218687453	1.03590536498901	1
N.A.	XLOC_029982	reverse transcriptase	114.212396014462	31.0254295014109	0.271646779019349	0.0361060676718757	60.8253914063086	58.0666966573758	0.954645672059799	1	142.275334258295	93.347364935663	0.656103641733109	0.655075324040603
N.A.	XLOC_000738	endonuclease-reverse transcriptase	0.612372435695794	40.6830391059495	66.4351246635136	7.84968391552583e-05	0	0.319822677334568	Inf	1	0	0	NA	NA
N.A.	XLOC_009677	endonuclease-reverse transcriptase	0.413278858754129	26.2604503418489	63.5417219768116	0.00216650173402358	0	1.89102815315683	Inf	1	0.518614181918708	2.32517889645829	4.48344641840659	1
N.A.	XLOC_034053	reverse transcriptase	9.07704318772005	116.805076623987	12.868185620402	0.000110403707331411	6.5004435775002	11.4298926514927	1.75832503047249	1	6.71829017395359	3.88719859216691	0.578599389356141	1
N.A.	XLOC_021614	endonuclease-reverse transcriptase	0.612372435695794	82.6613165816853	134.985364727861	4.95020222137044e-08	0	1.27929070933827	Inf	1	0.518614181918708	5.60336192238129	10.8044903470449	0.657844079152162
N.A.	XLOC_033000	endonuclease-reverse transcriptase	0.826557717508259	49.8773589798677	60.3434677619707	3.72960967545256e-05	5.80487593586925	9.87226836528006	1.70068550548647	1	3.09983799601744	1.60150047580745	0.516640055985183	1
N.A.	XLOC_007530	endonuclease-reverse transcriptase	3.90351160085803	34.681636094079	8.88472730206709	0.0183441885087678	1.26106875788782	13.0146793169246	10.3203566304529	0.398488908241552	6.21448486140339	8.88154494830428	1.42916832953691	1
N.A.	XLOC_008697	tpa_exp: reverse transcriptase	27.1556710388061	115.696304057093	4.26048407685304	0.0252503519877089	16.0885257870329	29.3671249614477	1.82534592355983	0.850045455092483	26.3604700616431	74.2515810521596	2.81677757940298	0.0543122308509282
N.A.	XLOC_006849	endonuclease-reverse transcriptase	0.612372435695794	89.7341989998715	146.535333351367	1.76787444291134e-08	0.695567641630943	0.319822677334568	0.459800971454995	1	0	1.48683762140052	Inf	1
N.A.	XLOC_011507	endonuclease-reverse transcriptase	1.02565129444992	30.012764612573	29.2621525219928	0.0021839980259874	0.695567641630943	0.639645354669135	0.91960194290999	1	2.07149495380113	0.533833491935816	0.257704461676939	1
N.A.	XLOC_015177	reverse transcriptase	268.757210019629	22.5669505886024	0.0839677960154232	3.43428368121686e-06	24.3703042239172	41.1440026694942	1.68828432716549	0.845884599705128	323.565506869463	154.316952306067	0.476926461658731	0.543177163271512
N.A.	XLOC_030339	endonuclease-reverse transcriptase	3.07695388334977	1343.41116702276	436.604257961851	5.15453948909692e-22	0.63053437894391	4.74152433831737	7.51985061664522	0.914541264720859	3.60956685631504	4.11652430098077	1.14044827671741	1
N.A.	XLOC_004647	endonuclease-reverse transcriptase	1.23983657626239	26.5803169833756	21.4385649627346	0.00941431511010968	0	2.85049618516054	Inf	0.956742519320929	3.09391444827004	1.79134540452248	0.578989960606089	1
N.A.	XLOC_022925	endonuclease-reverse transcriptase	12.2927238285283	77.5018844594397	6.30469581359808	0.00489054731403697	8.02164538613615	7.75872245694999	0.967223316847119	1	8.2593238503412	11.0563596961464	1.33865191588166	1
N.A.	XLOC_011157	endonuclease-reverse transcriptase	0	22.7161232309162	Inf	0.00146656562785155	0	0	NA	NA	0	0	NA	NA
N.A.	XLOC_028397	tpa_exp: integrase	7.39374434296193	40.1021203403737	5.42379050183778	0.0470236448959974	8.82748130521473	8.55148855548161	0.96873482478291	1	2.07445672767483	10.4830454241117	5.05339315313736	0.523332354761702
N.A.	XLOC_001451	reverse transcriptase	21.0017632721066	134.889621533976	6.4227760205796	0.00275493114701331	20.8274327530754	33.0382951559905	1.58628744827477	0.936378915773578	13.9611180775733	24.7743278801927	1.77452319667645	0.808919642380254
N.A.	XLOC_014704	gag-pol polyprotein	0	17.9138509107757	Inf	0.00599825948248011	0	1.7937232309955	Inf	1	1.03722836383742	2.02067111333634	1.9481448674046	1
N.A.	XLOC_003137	endonuclease-reverse transcriptase	12.7060026872824	0	0	0.0315126591254986	0	0	NA	NA	7.2339425819986	3.46802795463802	0.479410489553523	1
N.A.	XLOC_014799	endonuclease-reverse transcriptase	0	17.4448116269352	Inf	0.00691573426101373	0	0.319822677334568	Inf	1	0.515652408045006	0	0	1
N.A.	XLOC_013218	endonuclease-reverse transcriptase	1.02565129444992	159.172057509186	155.191202283378	4.73820931996947e-11	0	2.01624098616874	Inf	1	2.07149495380113	0	0	1
N.A.	XLOC_029199	endonuclease-reverse transcriptase	19.6864681714902	0	0	0.00367459405809997	0.695567641630943	5.28386477082517	7.59647869535125	0.854736705607455	14.9835375720422	9.22553351152508	0.615711307637991	1
Smp_149050.2	XLOC_017598	reverse transcriptase	3250.81542964219	852.965451139519	0.262385075252766	0.00731719414131197	1679.70475019171	1679.59026088241	0.999931839622835	1	3704.61761948527	2995.79179702649	0.808664241423853	0.879294195229343
N.A.	XLOC_002127	reverse transcriptase	41.1166020072217	179.804036444949	4.37302762551653	0.0125184356235095	22.0432664962027	42.1313786123485	1.91130378157005	0.703737770406409	56.4045513264437	82.9432810717489	1.47050688501556	0.769546962213872
N.A.	XLOC_015649	endonuclease-reverse transcriptase	16.470787530682	82.6670661349054	5.01901114205451	0.021224823243699	15.6078561813895	38.3357411164252	2.45618236552795	0.46630117863659	11.8807378021511	20.657803579212	1.73876436995956	0.923247872032702
N.A.	XLOC_002855	gag-pol polyprotein	29.3155169754229	132.762434525024	4.52874273499346	0.00922483734668315	0.695567641630943	2.43336858566464	3.49839244959549	1	8.27413271970971	5.67854399668939	0.686300811100431	1
N.A.	XLOC_004496	endonuclease-reverse transcriptase	32.8057497175268	4.44511251803529	0.135497970822488	0.0348185868930151	2.52213751577564	0.736950276830467	0.292192742156579	1	26.8642753741933	10.2537197152979	0.381686070905451	0.464343566433595
N.A.	XLOC_016429	endonuclease-reverse transcriptase	1.23983657626239	56.6088533996279	45.6583185908912	3.12633070059412e-05	0	0	NA	NA	1.55288077188242	0.419170637528887	0.269930985764453	1
N.A.	XLOC_020920	reverse transcriptase	8.00611677865773	107.744157588703	13.4577299541673	5.05241441119068e-05	2.52213751577564	22.5113091831689	8.92548841701282	0.625144974690868	12.417122627312	18.4510670230502	1.48593740891841	1
N.A.	XLOC_033493	endonuclease-reverse transcriptase	1.23983657626239	56.8541337199977	45.8561513739095	2.93547793277169e-05	3.15267189471955	1.6685103979836	0.529236930991204	1	2.07149495380113	4.95486557603854	2.39192741790006	1
N.A.	XLOC_010379	tpa_exp: orf3	2.05130258889985	45.9543507099306	22.4025216750576	0.000431562286159343	3.47783820815472	3.4622336289791	0.995513138265308	1	1.03426658996371	4.46051286420156	4.31273030327514	0.974802722874458
N.A.	XLOC_024620	endonuclease-reverse transcriptase	5.77081231768701	69.2513927064226	12.0002850368523	0.000968573696460379	5.99997572393035	9.32992793277226	1.55499428032028	1	16.5749214042827	36.6333275571876	2.21016598894533	0.481152185304629
N.A.	XLOC_033741	endonuclease-reverse transcriptase	0	19.5447277257679	Inf	0.00381544520784011	0	0.417127599495899	Inf	1	2.07445672767483	3.92667937226574	1.89287118881819	1
N.A.	XLOC_028410	reverse transcriptase	0.612372435695794	53.1606339667513	86.8109517476055	5.79964860781184e-06	0	0.319822677334568	Inf	1	0	3.16352017151607	Inf	0.817412374262916
N.A.	XLOC_013257	reverse transcriptase	0	21.3462985399731	Inf	0.00220316358753603	0	0	NA	NA	0	0	NA	NA
N.A.	XLOC_000919	endonuclease-reverse transcriptase	0	17.9138509107757	Inf	0.00599825948248011	0	0	NA	NA	0	0	NA	NA
N.A.	XLOC_016974	endonuclease-reverse transcriptase	0	13.9377776765809	Inf	0.0198867554347384	0	2.55858141867654	Inf	0.987142435260038	0.518614181918708	0.953004129464703	1.83759751023177	1
N.A.	XLOC_028867	reverse transcriptase	0.413278858754129	15.3821886886809	37.2198779658173	0.0348771575027908	1.89160313683173	4.44960957183337	2.35229551336338	1	1.55288077188242	5.1841912848524	3.33843484877983	0.973024953856994
N.A.	XLOC_031825	uncharacterized transposon-derived protein	4.51588403655382	49.3867983391279	10.936241484362	0.00294170894990056	1.39113528326189	3.1703188624951	2.27894360860537	1	2.58418558797243	5.03004765034664	1.94647306824942	1
N.A.	XLOC_033910	reverse transcriptase	102.489670920638	406.586587595106	3.96709818602054	0.0063416327779109	98.1569862893733	105.647150910759	1.07630801336243	1	91.5014945861148	111.691328076085	1.22065031376039	1
N.A.	XLOC_001162	reverse transcriptase	0.826557717508259	55.3509081904201	66.9655693945741	1.47702264717013e-05	0	3.36492870681777	Inf	0.909440057194813	1.03130481609001	8.69170001958926	8.427867187261	0.464266247832738
N.A.	XLOC_006860	endonuclease-reverse transcriptase	50.1936451949418	0	0	1.0722803279737e-06	8.21674517419725	5.75680819202222	0.700619049267843	1	35.6629458235691	13.8364105243428	0.387977218505561	0.335092422645012
N.A.	XLOC_023381	reverse transcriptase	2.67876672946644	88.2152016666146	32.9312741928019	3.65055356054677e-06	1.32610202057485	1.47390055366093	1.11145336542207	1	7.755518537791	1.67668255011555	0.216192191656229	0.756197140629597
N.A.	XLOC_019639	tpa: endonuclease-reverse transcriptase	11.541624635374	154.972225311521	13.4272453148879	2.74612709125637e-05	6.56547684018723	13.876842426767	2.11360770352991	0.934839906508147	8.79867044937582	36.3250402881761	4.12846923829872	0.0633419166955988
N.A.	XLOC_016867	reverse transcriptase	28.9927883458935	3.93878007361633	0.135853786349398	0.0350010762159159	6.56547684018723	13.9326582484681	2.12210911524147	0.916835438998804	32.0652260627488	20.35329579609	0.634746680290367	0.945851385658918
Smp_151120	XLOC_029482	Endonuclease-reverse transcriptase	602.030612482749	1.91345029594051	0.0031783272416157	1.55870100259656e-18	107.719631732072	163.338209069099	1.51632721392295	0.722250671077392	660.709455478749	490.55646250784	0.742469263062662	0.709572374236249
N.A.	XLOC_029455	endonuclease-reverse transcriptase	11.1132540717491	0	0	0.0404801861619255	3.15267189471955	0	0	0.866373692395101	6.71236662620619	0.838341275057774	0.124895036541173	0.643485599388852
N.A.	XLOC_005582	reverse transcriptase	10.27160464937	51.5082357948599	5.01462405857092	0.0375210929358891	2.0216696622058	12.0695380061619	5.97008414964939	0.536215742564058	11.3769324896009	12.9980692492851	1.14249330926117	1
N.A.	XLOC_004978	endonuclease-reverse transcriptase	16.6698811076236	91.4081185286622	5.48342954208944	0.011701509493577	24.8905703254135	23.5967355798159	0.948019079969552	1	30.5301159341086	22.8683196212633	0.749041361998712	1
N.A.	XLOC_017347	endonuclease-reverse transcriptase	0	20.0883533307653	Inf	0.0032914666417029	0	4.76943224916794	Inf	0.736041593971765	0.515652408045006	1.37217476699359	2.66104597900729	1
N.A.	XLOC_030432	endonuclease-reverse transcriptase	0	19.0756884419274	Inf	0.00438465931018562	2.52213751577564	0	0	0.916599549183452	1.55584254575612	0.838341275057774	0.538834265295367	1
N.A.	XLOC_010619	gap-pol polyprotein	0	14.5932827633137	Inf	0.0166561934452817	8.45707997701896	4.54691449399471	0.537645913997546	1	2.06853317992743	5.06952843044547	2.45078419801965	1
N.A.	XLOC_002716	endonuclease-reverse transcriptase	0.413278858754129	28.2111937983678	68.2618846834153	0.0013409266334844	0	0.417127599495899	Inf	1	1.03722836383742	0.533833491935816	0.514673056144359	1
N.A.	XLOC_028952	endonuclease-reverse transcriptase	7.80702320171606	57.3231730038383	7.34251346803197	0.00802853909030119	17.9999271717911	15.7957784907744	0.877546800052004	1	7.2369043558723	12.2349100485354	1.69062757318432	1
N.A.	XLOC_032436	endonuclease-reverse transcriptase	0.413278858754129	45.0162721422495	108.924691376558	3.12833361573986e-05	1.39113528326189	1.59911338667284	1.14950242863749	1	1.54695722413502	1.48683762140052	0.961136868042285	1
N.A.	XLOC_029681	endonuclease-reverse transcriptase	0.413278858754129	14.6678690844705	35.4914575806958	0.0435038103646275	0	2.30815575265273	Inf	1	0.518614181918708	0.419170637528887	0.80825139794305	1
N.A.	XLOC_010649	endonuclease-reverse transcriptase	1.83711730708738	19.3955550834541	10.5576029405571	0.0416558258195809	0	1.89102815315683	Inf	1	0	0.838341275057774	Inf	1
N.A.	XLOC_011469	reverse transcriptase	4.73006931836629	32.8054789587169	6.93551758984528	0.0422014316247038	0.63053437894391	3.36492870681777	5.33663003824428	1	1.03426658996371	1.90600825892941	1.84285973986289	1
N.A.	XLOC_017077	tpa_exp: pol polyprotein	41.2373356461881	206.853392712165	5.01616773903496	0.00816750168004544	8.02164538613615	11.3182610080904	1.41096501568766	1	24.2800897862208	28.1314724663134	1.15862308228688	1
Smp_210800	XLOC_000621	endonuclease-reverse transcriptase	1.02565129444992	61.805578682452	60.2598358885702	4.66710225189215e-06	1.26106875788782	2.85049618516054	2.26038125782679	1	2.58122381409873	3.39284588032993	1.31443304598311	1
N.A.	XLOC_002935	endonuclease-reverse transcriptase	0.413278858754129	24.2351205641731	58.6410847078708	0.00357780881666002	1.39113528326189	5.35326178213593	3.84812451135865	0.957028453954377	5.16837117594487	1.79134540452248	0.346597669466916	1
N.A.	XLOC_033485	endonuclease-reverse transcriptase	6168.69590533283	2220.13547303341	0.359903536680112	0.0414334646718921	5810.78959288985	3775.66666160231	0.649768263201658	0.439871933371585	8057.18962584635	8320.50014024179	1.03268019329603	1
N.A.	XLOC_001205	tpa: endonuclease-reverse transcriptase	30.2175332172851	180.961601278862	5.9886291835148	0.0018347560268766	26.8472067249322	32.885174412128	1.22490115076249	1	29.9818840134529	42.4227549223944	1.41494626899895	0.937213424187658
N.A.	XLOC_004976	endonuclease-reverse transcriptase	47.9583407339711	560.071359180729	11.6782889192829	2.80783200486685e-06	94.1532434608146	90.5475791279861	0.961704300348091	1	57.4654738812707	73.7534488544331	1.28343932231056	1
Smp_172120	XLOC_005588	reverse transcriptase	463.715118730332	44.3980602160952	0.0957442585388604	5.26770884246266e-06	295.350349259996	141.190448258619	0.478043952249838	0.164725366090916	425.154651048055	227.796129264494	0.535795924384105	0.104767278295442
N.A.	XLOC_003867	endonuclease-reverse transcriptase	7.17955906114947	62.3649760911286	8.68646327162379	0.00286542023498799	8.9123128158282	7.39741067915524	0.830021435739722	1	13.9759269469418	4.87968350173045	0.349149184898839	0.645428097955783
N.A.	XLOC_027287	reverse transcriptase	7.0106488939494	62.7651786070323	8.95283440327504	0.00436419788203742	5.17434155692534	21.2463451950716	4.1060963914598	0.45651339729631	7.7495949900436	11.6258944822915	1.5001938162224	1
N.A.	XLOC_022548	endonuclease-reverse transcriptase	52.492217889017	6.75301577665943	0.128647941508914	0.00967825658990818	22.6540026272201	43.1180090235714	1.90332850812697	0.936660844746228	46.5508818699882	32.7461289650207	0.703448090553412	0.922257094531504
Smp_147800	XLOC_009026	endonuclease-reverse transcriptase	1278.98601667573	190.756884419274	0.149146966371907	0.000114790189439677	367.740257523283	410.623825875348	1.11661374427941	1	1766.98732187051	912.754095725465	0.516559504659736	0.206817488500702
Smp_139520	XLOC_029540	endonuclease-reverse transcriptase	2825.01459184305	351.021942691675	0.124254913126897	9.72828483040461e-06	1314.59401577045	857.674310334567	0.652425235506572	0.442227932986327	3004.41086026625	1694.42622424468	0.56397952978193	0.0824123569370427
N.A.	XLOC_015888	tpa: endonuclease-reverse transcriptase	19.9761119776567	275.066326475611	13.769762944024	3.20306593771333e-06	10.5437829019118	17.9093243991044	1.69856725671553	0.97789129666966	17.5766084816357	22.8683196212633	1.30106554089524	1
N.A.	XLOC_029615	endonuclease-reverse transcriptase	49.2312621335963	369.43210379641	7.50401447750621	8.28277509617798e-05	27.3929095932627	52.2261647328018	1.90655777382797	0.674585840423811	42.9116972749362	35.7160247219322	0.832314426835621	1
N.A.	XLOC_004142	tpa: endonuclease-reverse transcriptase	0.413278858754129	16.5067330592542	39.9409084437935	0.0264792991062592	0	0.319822677334568	Inf	1	2.06853317992743	0	0	1
N.A.	XLOC_002496	endonuclease-reverse transcriptase	0.413278858754129	15.6059476521516	37.761301652829	0.0340431764966648	2.08670292489283	1.05677295416503	0.506431913023417	1	0.518614181918708	2.74434953398718	5.29169781634964	1
N.A.	XLOC_019640	reverse transcriptase	0	15.1369083683111	Inf	0.0142846477881737	0	1.05677295416503	Inf	1	0.518614181918708	0	0	1
N.A.	XLOC_030287	reverse transcriptase	0.413278858754129	32.5071336740894	78.6566575703519	0.000477240460122923	0	3.75414839546309	Inf	0.9442824610936	1.03426658996371	0.419170637528887	0.405282972104506	1
N.A.	XLOC_030679	endonuclease-reverse transcriptase	5.32735004919128	188.811890515975	35.4419906280867	6.81230037729041e-09	1.26106875788782	3.97666615063633	3.15340945984333	1	10.8405476644399	25.9961384985701	2.39804660274174	0.522971570024778
Smp_167230	XLOC_001926	reverse transcriptase	3827.8234978932	1027.94996660467	0.268546856241006	0.0139972382973224	3356.68085917828	2197.25588767942	0.654591836358644	0.455768400747769	3167.579154249	2834.80550173538	0.894943855762139	1
N.A.	XLOC_015763	tpa: endonuclease-reverse transcriptase	0	12.5679529856378	Inf	0.0306997305401213	3.47783820815472	1.91893606400741	0.551761165745994	1	0	0.533833491935816	Inf	1
N.A.	XLOC_004198	tpa_exp: pol polyprotein	4.92916289530795	359.042925928001	72.8405478889271	1.55023936121217e-12	13.1309536803745	35.5961310430356	2.71085649294747	0.471159561829892	3.10279976989114	15.0187403626214	4.84038335581941	0.331118290707548
N.A.	XLOC_027534	tpa: gag-pol polyprotein	11.1132540717491	0	0	0.0404801861619255	0	0	NA	NA	10.333780578016	0	0	0.0676162470698314
N.A.	XLOC_008716	endonuclease-reverse transcriptase	2.26548787071231	211.400362461477	93.3133940792225	3.18523129257945e-11	0.695567641630943	3.97666615063633	5.71715231219206	0.986727719438986	2.58418558797243	4.65035779291659	1.79954482161062	1
N.A.	XLOC_024606	tpa_exp: reverse transcriptase	22.9926990415233	0	0	0.00125066144177186	0	5.35326178213593	Inf	0.684046212912359	18.6316074887154	4.42103208410273	0.237286669267825	0.318372285455479
N.A.	XLOC_032885	endonuclease-reverse transcriptase	212.581468638809	712.368499181061	3.35103762215241	0.02170642650338	119.849649705307	130.523922731544	1.08906386503827	1	190.305052553323	173.664738813721	0.91255979010363	1
N.A.	XLOC_021633	endonuclease-reverse transcriptase	76.399123463652	340.932586963874	4.46251961419528	0.00857056287511924	40.0233954200673	58.9145330459772	1.47200237330284	0.905967868740895	100.735849548946	49.5881365404843	0.492259079190972	0.771401826160816
N.A.	XLOC_020762	tpa: endonuclease-reverse transcriptase	4.30169875474136	44.547232858409	10.355730467948	0.00405039490335998	0.63053437894391	4.39379375013223	6.96836508342567	0.951290641999955	2.58714736184614	2.32517889645829	0.89874234871534	1
N.A.	XLOC_028212	tpa_exp: gag protein	1174.73815125254	7357.72261848461	6.26328736377515	7.17215173846109e-05	3012.19944816733	2721.16575443113	0.903381665542344	1	979.858881736187	1891.13023017894	1.93000264163355	0.0835073632655047
Smp_136110	XLOC_001386	endonuclease-reverse transcriptase	65.8709598314784	650.211510249724	9.87098885325489	4.31233059422858e-06	29.6549140582902	32.4122309909309	1.09298010195615	1	62.5420300671308	103.676266725269	1.65770549203449	0.474361805408237
N.A.	XLOC_006755	gag-pol polyprotein	91.7415191794097	22.8280027126515	0.248829569390595	0.0360337190454198	24.6954705373524	19.3553170419148	0.783759799702521	1	87.8830424081787	41.0900609354996	0.467553919499669	0.212231755307024
N.A.	XLOC_008715	endonuclease-reverse transcriptase	6.18409117644114	292.377737263912	47.2790146396534	2.35527869790259e-10	0	3.26762378465644	Inf	0.917386722648671	11.8688907066562	7.39470732690377	0.623032725607348	1
N.A.	XLOC_005107	reverse transcriptase	0.612372435695794	98.2672642338369	160.469770528099	5.95919298341503e-09	0	4.54691449399471	Inf	0.766019382276246	0	6.13719541431711	Inf	0.356335195429489
N.A.	XLOC_008558	reverse transcriptase	1.23983657626239	48.3368402897116	38.9864609700642	0.000136124400186413	2.52213751577564	19.4941110645363	7.72920229075664	0.539917551506165	3.10279976989114	7.28004447249684	2.34628239409475	0.978333883283245
N.A.	XLOC_025715	tpa_exp: pol polyprotein	1.02565129444992	17.5193979480921	17.0812419804804	0.0395727483478058	0.695567641630943	2.2108508304914	3.17848430284576	1	1.03426658996371	0.533833491935816	0.516146897826938	1
N.A.	XLOC_032503	tpa: endonuclease-reverse transcriptase	14.9413071482531	136.477455635169	9.13423800749091	0.000114790189439677	20.8924660157625	16.3939347449833	0.784681651874642	1	10.3485894473845	14.4849068706856	1.39969866853172	1
N.A.	XLOC_028526	endonuclease-reverse transcriptase	0	12.1735000229542	Inf	0.0353107275126166	0	0.319822677334568	Inf	1	0	0	NA	NA
N.A.	XLOC_016555	endonuclease-reverse transcriptase	1.23983657626239	39.110976808435	31.5452677854843	0.00073176941772798	4.41374065260737	0	0	0.819072348683882	2.58418558797243	0.419170637528887	0.162206089020785	1
Smp_130600	XLOC_027034	reverse transcriptase	4227.46532358197	15289.7914891277	3.61677514037479	0.00938909426929355	2390.6140958439	3647.2740784876	1.52566408975351	0.469046235350266	4520.20346558381	4161.78542959364	0.920707543649501	1
N.A.	XLOC_019852	transposase domain-containing protein	2.06639429377065	41.2108929072677	19.9433830375462	0.00177231435892575	4.60884044066847	5.57577953730917	1.2098009486526	1	4.64383344627876	8.23304860196154	1.77289920002599	1
N.A.	XLOC_018994	endonuclease-reverse transcriptase	1.02565129444992	142.761432127988	139.191002732126	2.07805556030144e-10	0	4.9640420934906	Inf	0.72020976051432	1.54991899800872	5.90786970550325	3.81172804068694	0.882197440096516
N.A.	XLOC_024538	endonuclease-reverse transcriptase	20.1450221448567	0	0	0.00251226914233321	23.1092354660294	2.65588634083787	0.114927486231296	0.135814430852815	17.0461472042222	15.7818995633711	0.925833818885595	1
N.A.	XLOC_001934	reverse transcriptase	20.1299304399859	0.506332444418957	0.0251532138140518	0.00900044144146922	12.6955190894917	11.6659915962756	0.918906230934011	1	23.7970168907865	20.8909087739154	0.877879310242608	1
N.A.	XLOC_023192	rna-directed dna polymerase from mobile element jockey-like	258.768861712418	30.8389636985187	0.119175713393181	9.69985622931867e-05	146.346253349969	72.4579716058	0.495113266975994	0.30061024375998	210.969651935482	130.7438516936	0.619728242873454	0.42889380111164
N.A.	XLOC_024358	tpa_exp: gag protein	21.7528624652609	0	0	0.00185595190690718	18.8057630908696	23.5545009477244	1.25251503137143	1	32.6134579834046	62.1351133439207	1.90519856482371	0.464343566433595
N.A.	XLOC_028782	endonuclease-reverse transcriptase	1.02565129444992	18.9265157996136	18.4531681498674	0.0283264151506871	1.39113528326189	1.47390055366093	1.05949476761525	1	1.54991899800872	0.533833491935816	0.344426703990122	1
N.A.	XLOC_020043	endonuclease-reverse transcriptase	1889.34891707665	4.40781935745685	0.00233298323968501	0.0348608265883973	2487.13083711008	1033.66514141116	0.415605454280094	0.341662678499695	1236.55930793266	1327.82454982738	1.07380579427872	1
N.A.	XLOC_001698	endonuclease-reverse transcriptase	2.46458144765398	44.8513276962565	18.1983548317911	0.000916010926121726	7.19601121913114	3.49014153982967	0.485010575101782	1	8.27709449358341	0.838341275057774	0.101284487655381	0.457772361150056
N.A.	XLOC_018587	endonuclease-reverse transcriptase	114.610583168345	0.506332444418957	0.00441785069425249	4.50688917534552e-10	19.8264970459358	47.8466977039106	2.41327036203396	0.423076127385399	105.512962819541	77.4865038120942	0.734378997058584	0.977800409843758
N.A.	XLOC_027857	reverse transcriptase	73.0052437780155	473.855693237652	6.49070763572119	0.000179179495611066	102.220123861711	95.7213033186717	0.936423276576816	1	64.1363756732451	95.5259591693946	1.48941935316192	0.741008872282415
N.A.	XLOC_008580	endonuclease-reverse transcriptase	175.265637711971	559.443125004115	3.19197266678992	0.0210039647006357	167.654355708688	208.237105665688	1.24206200778651	0.972784488533754	154.138301417204	228.74157442218	1.4840021741452	0.547410008898227
N.A.	XLOC_017923	rna-directed dna polymerase from mobile element jockey-like	567.815531384996	116.442167268662	0.205070416063893	0.00535556263285321	279.046925436976	528.489907877975	1.89391052078564	0.194133958256327	583.388553990883	785.794118227293	1.34694812377065	0.726033560743149
N.A.	XLOC_014264	endonuclease-reverse transcriptase	25.472372194048	2.49436906151634	0.0979244902090111	0.0264941768679324	2.08670292489283	1.05677295416503	0.506431913023417	1	28.9328085541207	14.9792595825226	0.517725735284319	0.767233164154238
N.A.	XLOC_004779	endonuclease-reverse transcriptase	72.3748782238276	12.1362068623758	0.167685351052932	0.0077139600083752	1.26106875788782	13.1119842390859	10.3975173098788	0.394145285692475	69.2484731455896	24.3194559484546	0.351191222618364	0.0737685998388586
Smp_096900	XLOC_007902	endonuclease-reverse transcriptase	1150.61764503286	127.640295563356	0.110931981718142	0.000224508212111958	1583.9115154347	1100.61284121256	0.694870155616301	0.625487063497031	1145.4099606835	1176.56529208792	1.02720015756265	1
N.A.	XLOC_013981	tpa: transposase	1.23983657626239	130.982385067718	105.644878990889	2.37067979230153e-09	0	3.36492870681777	Inf	0.909440057194813	3.09687622214374	2.02067111333634	0.652486883036473	1
N.A.	XLOC_030433	endonuclease-reverse transcriptase	0.413278858754129	33.407919081192	80.8362643613165	0.000383237454816684	0.695567641630943	1.89102815315683	2.71868333139077	1	0.518614181918708	3.278183025923	6.32104392863836	0.982604002522195
N.A.	XLOC_000825	endonuclease-reverse transcriptase	27.0169442813477	454.791503902164	16.8335656011309	2.41455934991409e-07	7.63144581001395	13.0984030494763	1.7163724116718	1	28.384576633465	25.9171769383724	0.913072520793441	1
N.A.	XLOC_030062	endonuclease-reverse transcriptase	6.18409117644114	781.813584099577	126.423359842747	4.29150089545054e-16	3.21770515740658	10.9848571411462	3.41387933442599	0.799763328214187	8.78978512775472	18.1465592399282	2.0645054430999	0.856007638179095
N.A.	XLOC_024396	endonuclease-reverse transcriptase	0.413278858754129	29.2023373303065	70.6601286558425	0.01375801231479	0	0.319822677334568	Inf	1	0.518614181918708	0	0	1
N.A.	XLOC_006376	endonuclease-reverse transcriptase	1.02565129444992	30.4229893789359	29.6621176647101	0.00210821098341419	0	0.417127599495899	Inf	1	1.54991899800872	1.79134540452248	1.15576711223227	1
N.A.	XLOC_024446	tpa_exp: reverse transcriptase	0	11.7417538996921	Inf	0.0407316083107153	7.69647907270098	14.8227292691611	1.92591042334365	0.944095209867558	0.515652408045006	9.4905605145482	18.4049572279315	0.221406517716382
N.A.	XLOC_005933	tpa: endonuclease-reverse transcriptase	1.83711730708738	23.0517616761222	12.5477897286097	0.0198708444801909	1.39113528326189	5.47847461514784	3.93813217238089	0.943569368259309	0	4.53569493850966	Inf	0.56991349077619
N.A.	XLOC_028134	reverse transcriptase	27.4000397303602	130.012762892678	4.74498446615826	0.0156306861129334	48.4352403823256	35.9023725307606	0.741244850802095	0.99797036407118	35.1028668074186	41.580634161447	1.18453670435429	1
N.A.	XLOC_022014	tpa: pol polyprotein	0	11.0862488129594	Inf	0.0485342132748477	7.76151233538802	1.98833307531816	0.256178562810821	0.794361632857871	2.07445672767483	2.02067111333634	0.974072433702301	1
N.A.	XLOC_018599	endonuclease-reverse transcriptase	17.8795342741444	0.506332444418957	0.0283191070111464	0.0157240522566553	2.08670292489283	0.736950276830467	0.353164922538418	1	21.7521779018487	5.71802477678822	0.262871368678087	0.673003557673128
N.A.	XLOC_033808	endonuclease-reverse transcriptase	44.9748384934674	150.527112793486	3.34691836226048	0.0454826046621892	55.6312516014568	81.3428640282257	1.46217929107487	0.852281175979876	69.8144757094876	83.0579439261558	1.18969516109778	1
N.A.	XLOC_000829	endonuclease-reverse transcriptase	30.8449973578517	127.161234029057	4.12258858555834	0.0240427544188485	1.39113528326189	12.1389350174726	8.72591987531913	0.426815594847019	32.5956873401624	23.7066608963211	0.727294400910247	1
N.A.	XLOC_010615	endonuclease-reverse transcriptase	1.63802373014572	22.6200155528601	13.8093332450366	0.0223077831221076	4.17340584978566	4.32439673882147	1.03617929683104	1	9.82405171771843	6.55636605184599	0.667379024483461	1
N.A.	XLOC_001733	tpa: endonuclease-reverse transcriptase	13.7920208012155	0	0	0.0165753268107824	1.89160313683173	3.90726913932557	2.06558609638907	1	18.5723720112413	12.42853446314	0.669194783284404	1
N.A.	XLOC_029903	endonuclease-reverse transcriptase	36.5101677414431	0	0	3.87247043431212e-05	13.5013550085702	10.4840058090986	0.776515083296729	1	20.6912553470217	15.2480660714353	0.736932864425264	1
N.A.	XLOC_012731	endonuclease-reverse transcriptase	3.4902327421039	46.3860968331926	13.2902589198769	0.00202908462745192	0	0.417127599495899	Inf	1	1.03426658996371	5.90786970550325	5.71213434024831	0.763296407827217
N.A.	XLOC_034161	endonuclease-reverse transcriptase	70.4623023923862	12.4933666644809	0.177305683185154	0.0124190035138556	13.0206854029268	32.0086845810446	2.45829490464839	0.551197894400095	94.5509824262793	84.9996534792945	0.898982234749047	1
N.A.	XLOC_014268	gag-pol polyprotein	309.758881215127	84.8573403585741	0.273946432223976	0.0185182485988771	110.651767071896	156.762963462589	1.41672354279468	0.775508159330177	263.219366258828	153.454248194468	0.582989961474088	0.305670253384284
N.A.	XLOC_007225	endonuclease-reverse transcriptase	26.1149280394854	178.328081825491	6.82858790787633	0.000947559912322012	4.41374065260737	21.2742531059222	4.82000524733022	0.388664956276813	22.2322890234093	41.5092315730285	1.86706962694312	0.598833674098606
N.A.	XLOC_028399	tpa: endonuclease-reverse transcriptase	5.14334817712042	45.48531142609	8.84352174103751	0.00976732902966374	6.56547684018723	5.60368744815974	0.853508067206881	1	5.69290890561098	8.4623743107754	1.48647632538698	1
N.A.	XLOC_027547	tpa: endonuclease-reverse transcriptase	11.29725594382	57.3604661644167	5.0773804231456	0.0294122774924501	0	18.4652460212219	Inf	0.0780424474191011	12.9120426182411	16.4303959097138	1.27248618948193	1
N.A.	XLOC_010740	endonuclease-reverse transcriptase	1.65311543501652	23.5423223168619	14.2411847461981	0.0285003055386801	1.89160313683173	2.55858141867654	1.3525994796995	1	5.67810003624247	14.4097247963775	2.53777226614578	0.76563539101722
N.A.	XLOC_023265	gag-pol polyprotein	191.902433996231	1542.85160830359	8.03977091991388	1.57997435098936e-05	76.2635845664711	42.7431160561671	0.560465604903639	0.570796586250513	141.658981538544	61.4828375116884	0.434020044785931	0.0687255108875979
N.A.	XLOC_032032	endonuclease-reverse transcriptase	0.413278858754129	19.640835403824	47.5244135715853	0.0295659825378675	0	0.959468032003703	Inf	1	2.06557140605373	1.79134540452248	0.867239640940248	1
N.A.	XLOC_006306	reverse transcriptase	0.413278858754129	14.4441101209999	34.9500338936841	0.0446156291399828	6.5004435775002	13.876842426767	2.13475315358455	0.936378915773578	2.06853317992743	5.29885413925933	2.56164812374208	1
N.A.	XLOC_001155	endonuclease-reverse transcriptase	6.76628020239534	133.722034449604	19.763005735746	1.79703171242555e-06	3.21770515740658	9.74705553226816	3.02919473831596	0.905851303469654	11.3828560373483	13.6465655956278	1.19887008593029	1
N.A.	XLOC_029293	endonuclease-reverse transcriptase	93.3464580861926	11.5179949362215	0.123389737247301	0.00100069370290271	23.6295015675256	47.8331165143009	2.02429646590763	0.677292629848598	159.241513567928	152.773830039806	0.95938443824598	1
N.A.	XLOC_006862	gag-pol polyprotein	0	11.048955652381	Inf	0.0487782172218094	0	2.6279784299873	Inf	0.98869143026708	0	3.58269080904495	Inf	0.730223999024677
N.A.	XLOC_003868	gag-pol polyprotein	1.43893015320405	29.5594971324117	20.5426907390827	0.00530252139273515	1.39113528326189	1.47390055366093	1.05949476761525	1	1.55288077188242	2.43984175086522	1.57117133204477	1
N.A.	XLOC_027288	endonuclease-reverse transcriptase	4.94425460017875	51.4178776700238	10.3995206209981	0.0227203070576002	4.60884044066847	14.05787108148	3.05019695570998	0.748222890268828	4.14002813372856	11.1672430646637	2.69738337613817	0.769546962213872
N.A.	XLOC_003852	reverse transcriptase	3.09204558822057	40.4219869819005	13.0728948938825	0.00521655610047742	3.15267189471955	5.28386477082517	1.67599577351363	1	2.06260963218002	5.1841912848524	2.51341368912987	1
N.A.	XLOC_002770	rna-directed dna polymerase from mobile element jockey-like	0.413278858754129	31.963508069092	77.341260971948	0.000541167840828461	0	1.6685103979836	Inf	1	1.03426658996371	1.60150047580745	1.54844069348081	1
N.A.	XLOC_025093	tpa_exp: gag protein	18.3229965426402	0	0	0.00527155749541756	0	0	NA	NA	19.606638601205	0.419170637528887	0.021379015855534	0.59560480723773
Smp_084210	XLOC_027417	gag-pol polyprotein	14.5582116992406	0.469039283840516	0.0322181936580152	0.0454809853614503	10.6088161645988	5.45056670429726	0.513777090650847	0.958147743726907	13.9403856604574	3.62217158914378	0.259832954221508	0.737851037611844
Smp_194000	XLOC_029663	gag-pol polyprotein	415.995343860672	1170.61824476656	2.81401766159823	0.0495053774913747	653.307297922187	463.804239918734	0.709932739759439	0.936698677721862	364.482715311314	462.97394147702	1.27022193928067	0.924282705425688
Smp_175790	XLOC_031804	endonuclease-reverse transcriptase	495.981053122896	1451.45630786665	2.92643498925553	0.0399011714028529	278.427668095848	458.852287951591	1.64801253801268	0.858576878647464	647.587430669496	546.186029037682	0.843416661859878	1
N.A.	XLOC_030349	endonuclease-reverse transcriptase	7.82211490658686	51.7319947583305	6.61355597253729	0.0189719066519698	18.1950269598522	25.1958489664887	1.38476568471616	0.999450160168693	6.20856131365599	23.2123081844841	3.73875798462804	0.228811832149855
N.A.	XLOC_024617	endonuclease-reverse transcriptase	1.85220901195818	25.418479452224	13.7233321337483	0.043422137236762	4.60884044066847	1.59911338667284	0.346966532527844	1	7.76144208553841	11.8552201911053	1.52745070573865	1
N.A.	XLOC_033070	endonuclease-reverse transcriptase	223.329620380037	27.7048613539489	0.124053680415539	0.000152634497309116	56.4116507537012	63.0035763716471	1.1168539748416	1	230.804347124962	157.09153772717	0.680626425299164	0.769373338269558
N.A.	XLOC_005352	endonuclease-reverse transcriptase	134.312143044706	40.3474006607436	0.300400244878185	0.04938318505557	34.3683842574985	63.5036821720634	1.84773545640884	0.569592643240227	140.103138992788	172.012419100146	1.22775564014308	1
N.A.	XLOC_021211	endonuclease-reverse transcriptase	23.7739816444191	87.1709931704183	3.66665518945084	0.0479675013726761	4.60884044066847	21.9553875610515	4.76375518825015	0.368651798044245	39.2754744537578	51.956575702931	1.3228758258313	1
N.A.	XLOC_003585	gag-pol polyprotein	25.4874638989188	305.621239837201	11.9910415979114	5.05255036975037e-06	26.6323086889447	26.3914159432753	0.990954868070848	1	21.1950606595719	35.8344670622287	1.69069896226249	0.83912413634089
N.A.	XLOC_023405	tpa: endonuclease-reverse transcriptase	47.1950512495673	2.41978274035946	0.0512719591629143	0.000612016976171666	2.71723730383674	8.32897080030837	3.0652349680861	0.901090522395985	42.9472385614206	58.3230968260619	1.35801739016705	0.978333883283245
N.A.	XLOC_027485	tpa: endonuclease-reverse transcriptase	45.3881173522215	275.411987171277	6.06793150361405	0.000827622517225947	11.3694170689168	10.1506019421544	0.892798802315511	1	48.5394471553257	15.7029380031734	0.323508793846048	0.773868341155011
N.A.	XLOC_012553	reverse transcriptase	2.46458144765398	74.1124795440407	30.0710206248562	1.02792769223796e-05	0.695567641630943	7.82811946826075	11.2542893023397	0.902453389349845	1.03722836383742	4.46051286420156	4.30041543378073	0.974671841791979
N.A.	XLOC_029731	reverse transcriptase	0.413278858754129	19.97647384903	48.3365491021028	0.0108185059209211	0.695567641630943	2.11354590833007	3.0385914781405	1	4.13410458598115	2.02067111333634	0.488780840278806	1
N.A.	XLOC_015909	endonuclease-reverse transcriptase	1.43893015320405	55.8787619917383	38.8335471790021	3.39391968715789e-05	0	0	NA	NA	8.2563620764675	0.419170637528887	0.0507694107461224	0.729316284300173
N.A.	XLOC_016357	reverse transcriptase	1.23983657626239	41.7545185122651	33.6774372620449	0.000446298796782623	0	1.7937232309955	Inf	1	1.03130481609001	0.533833491935816	0.517629204874404	1
N.A.	XLOC_029610	gag-pol polyprotein	1.02565129444992	21.8153378238136	21.269741423681	0.0143455947858598	0	7.49471560131657	Inf	0.44727627028864	1.54695722413502	1.37217476699359	0.887015326335763	1
Smp_139140	XLOC_033625	gag-pol polyprotein	30.6308120760392	1.98803661709739	0.0649031639175024	0.00560744078553696	2.65220404114971	14.641700614448	5.52057850273879	0.489332702111718	18.5931044283572	5.60336192238129	0.301367743292795	0.584889292163629
N.A.	XLOC_021021	endonuclease-reverse transcriptase	23.9550821028687	122.678828350443	5.12120258338634	0.0242745856650168	45.5427015383542	94.6916927437259	2.0791847989953	0.344303244461094	16.5186477006824	31.176550297533	1.88735487689135	0.973062831473651
N.A.	XLOC_014043	Endonuclease-reverse transcriptase	1153.84029777444	1.44441101209999	0.00125182923051484	3.18096935590709e-23	5.17434155692534	4.9640420934906	0.959357251329249	1	1053.10939465953	78.5936515760647	0.0746300925379878	0.0945419248735761
N.A.	XLOC_005363	endonuclease-reverse transcriptase	14.4194849417821	0	0	0.0350010762159159	0.695567641630943	0	0	1	13.4454656695283	0.838341275057774	0.0623512264776164	0.104767278295442
Smp_004070	XLOC_003424	endonuclease-reverse transcriptase	472.740499339433	1992.7705262617	4.21535817017207	0.00224753944566633	430.154639828619	311.424471143194	0.723982592091232	0.823480142113367	372.016100808577	268.24903231132	0.721068340129043	0.939922422954506
N.A.	XLOC_034185	tpa: endonuclease-reverse transcriptase	16.9142497991777	144.808283262563	8.56131870948265	0.000645911694433504	6.06500898661739	10.8317363972838	1.78593905156353	1	21.1920988856982	25.0431343691054	1.18172034323633	1
N.A.	XLOC_028414	gap-pol polyprotein	16.3651455965864	77.5234058163389	4.73710455912531	0.012640554545962	21.1525990665106	15.6848923790034	0.741511354216333	1	12.4230461750594	15.3627289258422	1.23663139534042	1
N.A.	XLOC_029569	pro-pol polyprotein	1.23983657626239	23.9525470832248	19.3191163592158	0.0169801655529348	3.15267189471955	6.27124071367945	1.98918280211247	1	3.62733749955725	19.4002916666253	5.34835583096231	0.177168123151746
N.A.	XLOC_015000	endonuclease-reverse transcriptase	35.1768795223347	1411.37586675388	40.1222588790959	2.17534158515968e-12	19.7614637832487	59.6371566015667	3.01785117012028	0.216667927361453	50.7116424208327	64.5354743146871	1.27259680881831	1
N.A.	XLOC_020876	endonuclease-reverse transcriptase	70.7217627888111	4.80227232014048	0.0679037418012473	0.000169570961536828	5.80487593586925	5.95141803634488	1.0252446567497	1	58.950233854058	20.5864009907934	0.349216612808675	0.0735957351891352
N.A.	XLOC_029559	endonuclease-reverse transcriptase	365.590414797539	1275.68156749086	3.48937367025149	0.0118650158615657	254.877359520028	495.398779026808	1.94367510696014	0.16966561932816	399.855103541239	575.569140366006	1.43944427686077	0.515773448953269
Smp_149660	XLOC_033004	endonuclease-reverse transcriptase	3275.69632393266	1157.90539183585	0.353483741266259	0.0483964022102825	2090.72570478832	1332.80352104607	0.637483682337476	0.41203130925236	3301.81076664169	2408.57367761937	0.729470538394651	0.62499753203212
N.A.	XLOC_008844	endonuclease-reverse transcriptase	13.3485585327198	0	0	0.0224754080998792	0	4.51900658314413	Inf	0.778523487920529	6.72717549557469	3.39284588032993	0.504349244725639	1
N.A.	XLOC_014087	tpa: endonuclease-reverse transcriptase	114.408588177782	1056.01494147268	9.23020691271634	1.10331794301207e-05	83.5048308003629	120.457044521942	1.44251588042758	0.836830403282315	78.5716813246316	156.843314588909	1.99618121878906	0.500942273196944
N.A.	XLOC_024490	endonuclease-reverse transcriptase	22.2114164386274	1.44441101209999	0.0650301171062664	0.0190091884950993	5.99997572393035	15.7814517695334	2.63025260362147	0.994377674059364	28.473429849676	16.9247486215508	0.594404984257398	0.911385384778855
N.A.	XLOC_025531	tpa_exp: gag protein	14.1600245453573	0.469039283840516	0.0331241857906456	0.0477144478487944	1.39113528326189	0.319822677334568	0.229900485727498	1	6.19967599203488	0	0	0.322130584559278
N.A.	XLOC_012185	endonuclease-reverse transcriptase	10.868885380195	87.4478170981466	8.04570239166304	0.00127270808217301	5.80487593586925	15.1282252252547	2.60612378152218	0.836508919982981	13.4425038956546	26.8382592595174	1.99652233451784	0.749930491905859
N.A.	XLOC_033400	endonuclease-reverse transcriptase	41.1618771218341	179.191574072015	4.35333824892459	0.014906127589446	36.9809918027954	108.192151139826	2.92561518405917	0.221364813160473	43.9874286991317	87.2139490072354	1.98270168515117	0.271849298982416
Smp_210780	XLOC_004328	endonuclease-reverse transcriptase	4277.36874033398	21564.2891381237	5.04148471811199	0.000726762741679729	1636.52567332223	3135.4016918819	1.91588909541326	0.774449331394832	4312.78832181713	4258.92469068726	0.987510717635413	1
N.A.	XLOC_013314	endonuclease-reverse transcriptase	2.26548787071231	56.9287200411546	25.1286801298368	0.000135374031962095	4.04333932441159	9.80287135396931	2.42444933938258	0.933007102795785	2.06853317992743	4.11652430098077	1.99006926305393	1
N.A.	XLOC_018175	endonuclease-reverse transcriptase	5.74062890794541	41.8663979940005	7.29299849639376	0.0152053906986533	4.4787739152944	7.17489292398201	1.60197702757014	1	5.67810003624247	5.44921828787553	0.959690433964526	1
N.A.	XLOC_034045	endonuclease-reverse transcriptase	1.02565129444992	33.5570917235057	32.7178368565342	0.0010322409005248	0.695567641630943	1.91893606400741	2.75880582872997	1	1.54695722413502	0.838341275057774	0.541929189752828	1
Smp_144970	XLOC_017156	endonuclease-reverse transcriptase	3250.84563482214	1079.02218357903	0.331920461562631	0.0244509754081932	1360.33469978807	1437.21287034796	1.05651415829638	1	4187.54045285775	3011.71272228081	0.71920803062941	0.553987891929723
N.A.	XLOC_020293	endonuclease-reverse transcriptase	822.986201644357	2448.54890099856	2.97520042997838	0.0359998292729867	442.553312062713	677.347899544678	1.53054531755192	0.93465894104912	795.917010245994	861.885770357056	1.08288396812963	1
N.A.	XLOC_029104	endonuclease-reverse transcriptase	53.1498654393252	199.845074364677	3.76002973314798	0.0178851659867927	38.2618588086096	39.3789328809807	1.02919549930804	1	44.9743069071162	47.0731127153109	1.04666677382109	1
N.A.	XLOC_033003	endonuclease-reverse transcriptase	1.02565129444992	21.6446438246006	21.10331644071	0.015648371384026	1.32610202057485	5.47847461514784	4.13126179596119	0.94531247031441	1.03130481609001	0.838341275057774	0.812893784629241	1
N.A.	XLOC_015338	reverse transcriptase	11.2821642389492	0	0	0.0460939565085204	6.82560989093537	5.3811696929865	0.788379321257852	1	9.30839930967343	6.13719541431711	0.659318021299241	1
N.A.	XLOC_018705	tpa_exp: pol polyprotein	100.269458164538	458.370170461714	4.57138373790297	0.00262959282009202	87.0477022712046	198.307530415444	2.27814778841146	0.582228572410952	111.167368664794	118.691227602001	1.06768046259954	1
Smp_198230	XLOC_017837	endonuclease-reverse transcriptase	3412.56013437406	913.231987987796	0.267609053621938	0.00653107607486961	2300.6657141091	1675.8901140049	0.728437036170577	1	4462.66128933585	3749.96838803762	0.840298679399823	1
N.A.	XLOC_008045	reverse transcriptase	34.6579587294849	0.975371728259473	0.0281427921324658	0.000841308166012194	13.5211532564967	11.1515590746183	0.8247491070527	1	34.1604152075396	14.3702440162786	0.420669477492386	0.431237971160233
N.A.	XLOC_026805	reverse transcriptase	1.02565129444992	19.0011021207705	18.5258890849069	0.0281027362980446	0.695567641630943	0.319822677334568	0.459800971454995	1	0.518614181918708	0.419170637528887	0.80825139794305	1
N.A.	XLOC_019197	endonuclease-reverse transcriptase	10.3168797639824	95.4960712445923	9.2562939017649	0.00125994942899192	12.2402862506824	17.9651402208056	1.46770588962362	1	12.3963902101961	15.2085852913364	1.22685596641088	1
N.A.	XLOC_008712	endonuclease-reverse transcriptase	12.138905366199	247.814732601824	20.414915935655	1.73018000134665e-07	0	5.60368744815974	Inf	0.638351284656325	6.71829017395359	5.48869906797436	0.816978565357853	1
N.A.	XLOC_013896	endonuclease-reverse transcriptase	1.23983657626239	37.9491392772834	30.608178532436	0.00590927660209207	3.15267189471955	2.82258827430996	0.895300357464268	1	3.10576154376484	1.79134540452248	0.576781372065991	1
N.A.	XLOC_030656	endonuclease-reverse transcriptase	1.85220901195818	27.965913477998	15.0986812489547	0.0125923825388782	8.84727955314116	15.1561331361052	1.71308401018301	0.983874003429476	4.14298990760226	11.9304022654134	2.8796599874698	0.721869232332669
N.A.	XLOC_007479	endonuclease-reverse transcriptase	159.844882058238	493.416192767099	3.08684386020773	0.0396680516264575	21.1525990665106	39.7674070379946	1.88002462075479	0.756267657772631	176.252119485665	168.021896111241	0.953304258703716	1
Smp_122630	XLOC_003136	tpa_exp: reverse transcriptase	190.686393365704	0	0	0.0130002929785861	9.71814873490678	3.97666615063633	0.409199967927274	0.880428968875672	98.7680166807241	81.6181460566333	0.826362103842489	1
N.A.	XLOC_007398	endonuclease-reverse transcriptase	6.16899947157034	38.1140837232763	6.17832501022637	0.0407145521261462	0.695567641630943	4.19918390580957	6.0370604589418	0.957028453954377	5.16540940207117	3.04885731710914	0.590245047350292	1
Smp_045930	XLOC_026532	tpa: endonuclease-reverse transcriptase	4028.56382457607	763.066307693655	0.189413979999176	0.018672621151545	2549.51452472017	1810.06747579208	0.709965547652941	0.617127452266035	3706.37220463458	2919.84085650888	0.787789432712075	0.817714404934117
N.A.	XLOC_013978	tpa_exp: reverse transcriptase	4.31679045961216	55.9906414734736	12.9704330097375	0.00116469313808382	3.47783820815472	1.89102815315683	0.543736666278154	1	2.58418558797243	0	0	0.920025859501821
N.A.	XLOC_027472	endonuclease-reverse transcriptase	3.30623087003303	67.6420372483296	20.4589576189075	0.000153138286188979	0	0.834255198991798	Inf	1	5.67513826236877	2.85901238839411	0.503778455469872	1
N.A.	XLOC_024769	reverse transcriptase	2.8929520112789	61.4484188803468	21.2407321797163	0.000225692814788203	0.695567641630943	4.93613418264003	7.09655522655705	0.901090522395985	1.03722836383742	3.16352017151607	3.04997460714634	1
N.A.	XLOC_020698	endonuclease-reverse transcriptase	7.16446735627867	205.936835501383	28.7441934285468	1.20445801562985e-08	0	0.959468032003703	Inf	1	4.12818103823375	4.65035779291659	1.12649075945232	1
Smp_076630.2	XLOC_000560	endonuclease-reverse transcriptase	1891.49427771536	5939.53312883921	3.14012746367558	0.0214224653406355	1873.09222594954	1529.8566865365	0.816754597206745	0.909388281766871	1869.94746359861	1945.87063619595	1.04060176773696	1
N.A.	XLOC_028346	reverse transcriptase	16.6698811076236	133.023486649073	7.97987014965794	0.000834980163872959	22.2185680363373	51.0992492356947	2.29984439825845	0.775740065225715	11.3769324896009	38.0412036183905	3.34371357597157	0.121884554650535
N.A.	XLOC_028841	endonuclease-reverse transcriptase	27.0500291047106	0.469039283840516	0.0173396960877516	0.00372274191509925	38.3268920712967	16.3796080237424	0.427365933905431	0.486146083826397	28.9624262928577	29.0487753015688	1.00298141488002	1
Smp_152260	XLOC_000189	endonuclease-reverse transcriptase	588.160231743559	3666.32342300804	6.23354525711385	0.000166390883634934	350.591401285331	619.026887942877	1.76566477578575	0.25401222633024	634.494416090939	1133.13115482651	1.7858804208359	0.105963809197682
N.A.	XLOC_027289	endonuclease-reverse transcriptase	14.603486813853	0.469039283840516	0.0321183077589101	0.036223225290253	0	0.959468032003703	Inf	1	32.5305283149409	3.04885731710914	0.0937229573277121	0.357199280696118
N.A.	XLOC_016675	tpa: endonuclease-reverse transcriptase	5.11316476737882	49.7812513018116	9.73589813092041	0.00267951697852055	5.17434155692534	7.91184320081247	1.52905313918121	1	5.68698535786358	6.78569176065985	1.19319662943691	1
Smp_013870	XLOC_010871	endonuclease-reverse transcriptase	3629.95234904607	1091.6159306188	0.300724589650791	0.0150932336464958	3402.04249379409	2180.99851036216	0.641085028873296	0.397305184631156	4387.2723756757	3501.86007433107	0.798186156334034	0.817412374262916
N.A.	XLOC_008799	endonuclease-reverse transcriptase	12.3530906480115	75.1409162365579	6.08276247439774	0.0119614069287361	23.1092354660294	22.692337837882	0.981959696210624	1	17.0787267168329	35.6408426476241	2.08685596054981	0.540890436807795
N.A.	XLOC_004165	reverse transcriptase	9.27613676466171	48.8646940910298	5.2677849982963	0.0485055116344199	0.695567641630943	4.47751748268395	6.43721360036993	0.985473069233021	6.72421372170099	15.1691045112376	2.25589267965747	0.763149408825702
Smp_159220	XLOC_018638	endonuclease-reverse transcriptase	27.0953042193229	117.231073194029	4.32661955906094	0.0169710102777737	12.5004193014306	16.4633317562941	1.31702236215468	1	22.7597885269491	31.9434889841722	1.40350552670333	1
N.A.	XLOC_028149	endonuclease-reverse transcriptase	1.23983657626239	33.2960395994566	26.8551841726035	0.00229484753988204	0	7.0496800909701	Inf	0.495661362559352	1.55288077188242	6.02253255991018	3.87829682030874	0.877420168393571
N.A.	XLOC_017761	endonuclease-reverse transcriptase	9.03176807310765	78.9147518641812	8.73746438409465	0.00134381875920293	6.26010877467849	29.57531599538	4.72440928103505	0.212594588498595	17.5914173510042	15.9717444920861	0.907928234172348	1
N.A.	XLOC_030856	endonuclease-reverse transcriptase	6.61246174006607	44.0624217708893	6.66354279283119	0.0358180872577701	3.91327279903753	12.7506724612912	3.25831423365813	0.771577285746952	1.55288077188242	7.16538161808991	4.61425097652793	0.723715100660571
N.A.	XLOC_001580	reverse transcriptase	24.1570770934316	0	0	0.0358272053006107	14.632357241084	6.28482190328906	0.429515340538765	0.977527581192254	18.0922608896807	15.9360431978768	0.880820992746476	1
N.A.	XLOC_033894	reverse transcriptase	37.1376318820097	0	0	3.15185146856605e-05	24.1497676690219	12.3335448617953	0.51071070458438	1	32.0711496104962	11.0525802102568	0.344626879438071	0.317466395369565
N.A.	XLOC_021132	tpa_exp: gag protein	350.579451952175	44.5845260189874	0.127173814011979	0.0472921275459325	108.726205958119	159.694946785407	1.46878064380284	0.987138261108022	213.15073252261	358.363160408251	1.68126637974485	0.55881376932575
N.A.	XLOC_027972	endonuclease-reverse transcriptase	28.3049573858437	1.40711785152155	0.0497127705348638	0.00671726639292684	0	0.639645354669135	Inf	1	36.685365318038	6.97553668937488	0.190144942783084	0.051579254256506
N.A.	XLOC_013880	endonuclease-reverse transcriptase	3.90351160085803	43.1616363637867	11.0571302911715	0.00485280207866653	7.69647907270098	9.45514076578417	1.22850210810305	1	2.58122381409873	12.3890536830411	4.79968207924152	0.4566025605228
N.A.	XLOC_005124	reverse transcriptase	2.46458144765398	25.5461307376385	10.3653018900859	0.0304799824685773	5.17434155692534	1.7937232309955	0.346657291804554	0.990577825687038	3.10279976989114	2.21051604205136	0.712426262081654	1
N.A.	XLOC_018372	tpa: endonuclease-reverse transcriptase	79.9195396154975	317.790467162916	3.97638010293658	0.0181184356504922	43.1760673147868	95.7484656978909	2.2176282290791	0.304451276252404	121.518919886052	243.029077392371	1.99992789287675	0.116842694128118
N.A.	XLOC_020801	endonuclease-reverse transcriptase	30.1722581026727	409.39080104769	13.5684508482786	5.83352678945716e-07	3.91327279903753	7.81453827865114	1.99693164263251	1	25.3143563761845	26.605154064814	1.05099073701293	1
N.A.	XLOC_028138	tpa: endonuclease-reverse transcriptase	80.0129912583436	501.028428093043	6.26183848664447	0.000460953362469361	27.978208957446	84.4445314110414	3.01822506006296	0.104805906554324	98.8213286104508	98.3774125860096	0.995507892570529	1
N.A.	XLOC_026896	endonuclease-reverse transcriptase	31.2733679214766	126.857139191209	4.05639518934229	0.0287670561472461	8.58714650239303	39.9212733134885	4.64895682196215	0.280649761647971	24.3067457510841	33.3118842652762	1.37047898580954	0.996354057828417
N.A.	XLOC_008089	tpa_exp: reverse transcriptase	1.65311543501652	28.568353600473	17.281523718994	0.0108778176057716	3.34777168278065	10.5119137199492	3.13997330642872	0.844075987542309	9.30543753579973	15.7424187832722	1.69174407143224	0.979253197407512
N.A.	XLOC_031633	endonuclease-reverse transcriptase	13.1192815460365	160.979377876611	12.2704415871954	1.36623313423244e-05	5.73984267318222	16.3660268341328	2.85130233805856	0.751586167891782	21.2098695289404	25.731111495547	1.21316689197156	1
N.A.	XLOC_032189	tpa: gag-pol polyprotein	1.22474487139159	25.9405837003221	21.1803978985825	0.00560549472877625	0	0.319822677334568	Inf	1	2.07149495380113	2.21051604205136	1.06711147811156	1
N.A.	XLOC_025827	tpa: endonuclease-reverse transcriptase	788.421109920954	15787.7394094722	20.0245011337343	4.88978298935966e-10	18.9358296162437	34.9979747888267	1.84824090087948	0.823480142113367	1265.22024079844	863.380574593719	0.682395480844397	1
N.A.	XLOC_019019	tpa: endonuclease-reverse transcriptase	132.357193512274	0	0	5.34843483833381e-05	107.894933272207	47.3330107138847	0.438695398183981	0.389494632620193	154.464400297332	116.309764060682	0.752987509334155	1
N.A.	XLOC_025206	reverse transcriptase	37.442367393047	6.39585597455424	0.170818685352197	0.0326176384069062	8.52211323970599	11.0127650519968	1.29225753545335	1	42.8820795361992	8.65221923949043	0.201767715863374	0.117570366731856
N.A.	XLOC_015892	endonuclease-reverse transcriptase	12.7210943921532	0	0	0.0290257119032827	6.43541031481316	16.4075159345929	2.54956795790095	0.819330290302908	9.29951398805232	9.4905605145482	1.02054371085858	1
N.A.	XLOC_013324	endonuclease-reverse transcriptase	79.8893562057559	464.976967308021	5.82026178944875	0.00106035348953072	51.9979101010938	99.7402041013995	1.91815793956883	0.642298171307682	79.0873337326766	111.102895860492	1.40481276352079	0.986322587979964
N.A.	XLOC_025842	tpa: endonuclease-reverse transcriptase	30.1722581026727	158.180913977248	5.2425944865968	0.00395947176640104	51.4578457516711	22.998579325607	0.446940189385213	0.468122701574045	25.3350887933004	15.5525738545572	0.613874850861778	0.924173963477918
N.A.	XLOC_020021	reverse transcriptase	1.23983657626239	22.1136831084411	17.8359660715165	0.0256132296343229	10.9792174927946	17.9093243991044	1.63120226107716	1	3.61549040406245	8.95672702261239	2.47732009260719	0.896349498377198
N.A.	XLOC_021617	endonuclease-reverse transcriptase	37.9038227800348	151.272976005054	3.99096884984211	0.0136977931643984	41.7651337835985	74.2788572160147	1.77848962727816	0.849386861529597	30.0115017521899	33.0111559680438	1.09995015379845	1
N.A.	XLOC_033357	tpa: endonuclease-reverse transcriptase	1.43893015320405	26.2604503418489	18.2499826578621	0.0101223200930306	0.63053437894391	1.59911338667284	2.53612402443657	1	0.515652408045006	4.65035779291659	9.01839634677068	0.794685440289795
N.A.	XLOC_032006	reverse transcriptase	12.7210943921532	80.5241073222742	6.32996696981858	0.00534572166990084	1.26106875788782	6.2154248919783	4.92869627694893	0.89896719247539	8.78089980613361	17.8777527510155	2.03598186355885	0.83209665793816
N.A.	XLOC_008210	TPA: hypothetical protein	1.22474487139159	25.077091453798	20.475359431638	0.00691573426101373	0	2.72528335214863	Inf	0.981166300466343	1.03722836383742	1.90600825892941	1.83759751023177	1
N.A.	XLOC_019487	endonuclease-reverse transcriptase	50.3776470670127	0	0	1.11211977526303e-06	1.39113528326189	16.1849981794197	11.6343811950982	0.236304307330601	22.7568267530754	17.4228808192773	0.76561117278457	1
N.A.	XLOC_015176	reverse transcriptase	68.4562749180988	4.80227232014048	0.0701509441740138	0.000228519526449434	2.78227056652377	6.6325524914742	2.38386322713432	0.999450160168693	65.6596387063905	36.7009506597166	0.55895754808874	0.875970792254395
N.A.	XLOC_034099	reverse transcriptase	33.556848910681	235.757384757844	7.02561153418679	0.000156196788566181	19.0008628789308	45.0369450875789	2.37025788642043	0.668838343861802	30.020387073811	57.2949106222891	1.90853337371761	0.500517807740406
N.A.	XLOC_008709	endonuclease-reverse transcriptase	2.66367502459564	42.5434244376324	15.9717022702838	0.00134146522669226	0	1.2513827984877	Inf	1	2.06853317992743	1.37217476699359	0.663356421017975	1
N.A.	XLOC_021840	tpa: endonuclease-reverse transcriptase	72.6221483290029	1.48170417267843	0.0204029239945617	2.25920866451968e-06	77.1598905150709	8.78758750026446	0.113888024485313	0.414073249506816	58.4523520892552	24.5130803630592	0.419368588036087	0.172762079220481
Smp_148910	XLOC_017651	endonuclease-reverse transcriptase	284.389249541553	83.1676490261043	0.292443013089187	0.0228139251706632	46.0431693919241	41.4781520680698	0.900853538447876	1	423.581341613078	127.272044253073	0.300466596966704	0.401598233301921
N.A.	XLOC_007354	gag-pol polyprotein	2.26548787071231	24.6295735268567	10.8716421947175	0.0347305995425124	0.695567641630943	1.47390055366093	2.11898953523051	1	1.03130481609001	1.79134540452248	1.73696988181827	1
N.A.	XLOC_023569	tpa: endonuclease-reverse transcriptase	259.83978812148	16.7677851833032	0.0645312455976294	6.46170479199107e-07	524.627411083961	305.529614460182	0.582374477591459	0.289134935105807	255.229867585015	200.05568511328	0.783825525618167	1
N.A.	XLOC_001717	endonuclease-reverse transcriptase	15.8131399803738	182.4318063451	11.5367224075372	2.14816760779856e-05	3.28273842009362	3.36492870681777	1.02503711115728	1	10.8612800815558	3.58269080904495	0.32985898366887	0.77775162175198
Smp_140280	XLOC_022496	tpa: gag protein	1.43893015320405	32.901586636773	22.8653118176107	0.00247771389359368	0	3.83787212801481	Inf	0.926237309633078	3.10576154376484	5.67854399668939	1.82839020854311	1
N.A.	XLOC_012162	gag-pol polyprotein	3.71950972878716	79.3407484342233	21.3309694608849	6.18768890520592e-05	2.08670292489283	9.51095658748531	4.55788721721075	0.729132916247833	9.29951398805232	11.6258944822915	1.25016151351866	1
N.A.	XLOC_012733	endonuclease-reverse transcriptase	1.65311543501652	31.2491884648816	18.9032101467066	0.006640018489964	0	1.05677295416503	Inf	1	1.54695722413502	15.3984302200514	9.95401164286329	0.105258110182358
Smp_200920	XLOC_001408	reverse transcriptase	18214.7682330354	64946.0822811651	3.56557280610219	0.00720449015296469	54494.7206184009	29022.1646752721	0.532568372604379	0.111128492060873	17001.3695900955	22440.460806677	1.31992076801566	0.853129366100145
N.A.	XLOC_018232	tpa: endonuclease-reverse transcriptase	61.475809433891	245.815196878286	3.99856787803059	0.0154852934286918	44.6322358607358	59.6514833228076	1.33651120479234	0.98869143026708	63.0902619877866	76.5767599486179	1.21376512849863	1
N.A.	XLOC_026835	endonuclease-reverse transcriptase	4.51588403655382	80.9027884812786	17.9151607584276	4.60496777503144e-05	3.15267189471955	6.11811996981697	1.94061423900923	1	3.09983799601744	8.23304860196154	2.65596092845467	0.905480736461588
Smp_083400	XLOC_028139	reverse transcriptase	6188.55414154474	1978.3191897315	0.319673892234493	0.0250141672255987	8090.07890809585	4668.51939146903	0.577067225734619	0.210188282402592	6786.26379355107	6635.09448663636	0.977724221823154	1
N.A.	XLOC_003992	reverse transcriptase	57.2977457317373	248.113077886451	4.33024152552343	0.00754616689985987	17.6295258435953	69.7885040753525	3.95861492217649	0.0539299016134065	51.2184095072566	74.5203875410723	1.45495317519601	0.819593855003931
N.A.	XLOC_006379	tpa_exp: pol polyprotein	54.5737038876584	192.734898785912	3.53164408966382	0.0246317990004081	9.08761435596287	32.9402447021978	3.62474059878916	0.328053402772324	39.8503623392769	58.0862121454689	1.45760813040886	0.982604002522195
N.A.	XLOC_006784	reverse transcriptase	45.2975671229967	3.97607323419477	0.0877767502037918	0.00944612933698481	10.238414836403	10.1920910426146	0.995475491613828	1	37.2217501431989	20.048788012968	0.538630986878281	0.709521080994195
N.A.	XLOC_001156	tpa: endonuclease-reverse transcriptase	3.70441802391636	35.9983958207644	9.71769265464981	0.0447939315664936	1.39113528326189	4.64421941615604	3.33843837622063	0.99797036407118	4.64975699402616	6.25185826872404	1.34455591480505	1
N.A.	XLOC_003253	endonuclease-reverse transcriptase	3.4751410372331	36.0887539456005	10.3848314525773	0.00673926306755821	1.32610202057485	4.8388292604787	3.64891176199333	0.994377674059364	1.03426658996371	2.51502382517332	2.43169783262704	1
N.A.	XLOC_015908	endonuclease-reverse transcriptase	1.65311543501652	31.8301072304574	19.2546186165997	0.00599035279735945	0	0.639645354669135	Inf	1	5.16540940207117	0	0	0.461680978117481
N.A.	XLOC_009151	endonuclease-reverse transcriptase	39.4333031624636	4.29593987572153	0.108941922973646	0.010675729092315	0.695567641630943	8.70460929934409	12.5143965566509	0.57922838402342	54.8575941023087	20.9228305822351	0.381402628471352	0.562519094043365
N.A.	XLOC_027092	endonuclease-reverse transcriptase	6.58227833032447	40.6672673022703	6.17829652005397	0.035357588644706	2.0216696622058	15.5038637242904	7.66884126231309	0.347584792985202	11.8896231237722	18.1070784598294	1.52293123771316	1
N.A.	XLOC_008955	endonuclease-reverse transcriptase	1.02565129444992	19.1129816025058	18.6349704874662	0.0278112951415069	0	1.05677295416503	Inf	1	0	0	NA	NA
N.A.	XLOC_011012	transposase domain-containing protein	248.132154732528	30.6309765387273	0.12344621990546	0.00040075937514987	101.069323381271	177.730229549154	1.75849826241232	0.455686488853205	232.739600480573	235.254680208037	1.01080641077956	1
N.A.	XLOC_033437	tpa_exp: pol polyprotein	71.0293997134696	10.1854634058568	0.143397852817913	0.00535556263285321	7.69647907270098	2.40546067481406	0.31254040348737	0.845720096397903	52.1401286900197	14.0657362331567	0.269767961578681	0.786425581842479
Smp_167530	XLOC_028316	tpa_exp: orf3	2.25039616584151	21.1010182196032	9.37657935073521	0.0468720296600121	1.39113528326189	0.639645354669135	0.459800971454995	1	0.518614181918708	4.3063692296958	8.30360869377617	0.877420168393571
N.A.	XLOC_011076	tpa: endonuclease-reverse transcriptase	64.782040303924	1.51899733325687	0.0234478155694158	4.51431542655045e-06	1.39113528326189	4.07397107279766	2.92852256844866	1	53.8025950952291	21.1954165570373	0.393947848045657	0.164809320290204
N.A.	XLOC_011461	reverse transcriptase	21.7830458750025	90.8587433704448	4.17107616133295	0.0328145356986923	31.0206125747179	72.1939647501665	2.32729010674036	0.300051704947634	21.7077512937432	47.2272563498167	2.17559413274783	0.360402940829738
N.A.	XLOC_013598	reverse transcriptase	35.0561458833683	0.975371728259473	0.0278231306859725	0.000814934904076716	6.95567641630943	13.2371970720978	1.90307833197354	0.97427043546405	21.1595193730875	8.69170001958926	0.410770200699555	0.997858744985404
N.A.	XLOC_006494	endonuclease-reverse transcriptase	27.4000397303602	196.108531897632	7.1572353116093	0.000856270435757961	48.720810199908	68.2165530678988	1.40015227144206	0.951287776712141	31.5021852727246	31.9791902783815	1.01514196559785	1
Smp_178400	XLOC_010447	transposase domain-containing protein	63.4063783838244	320.502845634683	5.05474139674955	0.00199201179081311	29.9998786196518	22.7345724699735	0.75782214848966	1	52.7446343142757	40.2874209546511	0.763820272496363	1
N.A.	XLOC_032602	endonuclease-reverse transcriptase	5.54153533100375	35.7531155003945	6.45184292164722	0.0338920937014655	9.65311547221974	19.4805298749267	2.01805623593635	0.896935697027978	10.8642418554296	12.4642357573492	1.14727156512261	1
N.A.	XLOC_030727	endonuclease-reverse transcriptase	10.0876027772992	59.2739164603572	5.87591698136106	0.0212513444436268	11.4994835942909	14.4470907701253	1.25632517770606	1	13.448427443402	11.3965687734776	0.847427613484203	1
N.A.	XLOC_028135	reverse transcriptase	21.3999504259899	92.2873825788655	4.31250450313118	0.0323282279652329	15.6728894440765	24.3336858566464	1.55259730144036	0.952551799986724	23.2428614223834	28.6615264723596	1.23313244232304	1
N.A.	XLOC_003118	endonuclease-reverse transcriptase	722.951823293745	253.40870668859	0.350519493171852	0.0479007773495421	165.788189338691	207.461648414922	1.25136566870331	0.949111395467776	828.972076290601	945.992891481119	1.14116375995938	1
Smp_194710	XLOC_012540	reverse transcriptase	184.656705288356	1032.51270815766	5.59152567216721	0.000747460431106245	122.456618731696	161.450163042467	1.31842741302703	0.868937993139081	253.472320661826	478.182526768357	1.88652759212447	0.100071641498888
N.A.	XLOC_017327	reverse transcriptase	529.847855735092	3.39515446861894	0.00640779127794831	0.00576862413859453	38.5417901072842	63.044319940476	1.63573927845559	0.736041593971765	488.576631709697	238.931450520838	0.489035772514816	0.460447912724911
Smp_047420	XLOC_007855	endonuclease-reverse transcriptase	3317.55997621609	898.539643834464	0.270843526650967	0.00720449015296469	2199.89586654744	1654.83795636301	0.752234676889569	0.77249409099561	3501.14520425252	2877.528984955	0.821882217698349	1
N.A.	XLOC_012228	endonuclease-reverse transcriptase	7.60792962477439	93.6572072698086	12.310472347802	0.000190110249769222	2.08670292489283	6.28482190328906	3.01184314658103	0.976675498783143	4.13114281210745	0.533833491935816	0.129221747157051	0.8443474267269
Smp_095460	XLOC_005699	reverse transcriptase	6.58227833032447	81.2384269264846	12.3419920656075	0.000349227715301989	4.17340584978566	17.5057779892182	4.19460235100721	0.705187075120695	7.2339425819986	9.07138987701931	1.25400357746731	1
N.A.	XLOC_010339	uncharacterized transposon-derived protein partial	14.2052996599697	100.916555490887	7.10414830426059	0.00297613821903898	4.04333932441159	8.10645304513514	2.0048906101431	1	10.3397041257634	17.9529348253236	1.73631030510731	0.933349771099684
N.A.	XLOC_003225	endonuclease-reverse transcriptase	15.4149528264905	69.9284191500545	4.53640176114475	0.033965768077431	11.4994835942909	36.9033296632245	3.20912929355765	0.31201736343551	10.8672036293033	26.1897629131747	2.40998179536771	0.558943316920044
N.A.	XLOC_011757	reverse transcriptase	2.47967315252478	39.1482699690135	15.7876734396036	0.00409735569268324	4.60884044066847	7.42531859000581	1.61110341865705	1	7.23098080812489	5.2593733591605	0.727338862972911	1
N.A.	XLOC_024519	endonuclease-reverse transcriptase	14.8327638005363	67.7912098906434	4.57036940669092	0.0441270937651448	5.23937481961238	29.7563446500931	5.67936932832275	0.168088130603665	27.957777441631	30.6070155113879	1.09475853634245	1
N.A.	XLOC_033921	endonuclease-reverse transcriptase	2.06639429377065	35.0760890567626	16.9745382875393	0.00535556263285321	0	0.319822677334568	Inf	1	1.03722836383742	0.953004129464703	0.918798755115884	1
N.A.	XLOC_004571	tpa_exp: reverse transcriptase	68.610093380428	6.79030893723787	0.0989695335289385	0.00108464720772432	9.52304894684568	17.0750692001126	1.79302545806702	0.980550396291619	80.6313291829379	48.3268451420081	0.599355680127301	0.900011346631612
N.A.	XLOC_024044	reverse transcriptase	25.1345518596479	160.323872789879	6.37862467909244	0.00235647702395681	19.0658961416178	30.9247492476604	1.62199295632145	0.893423528465587	33.6032979652628	24.2404943882569	0.721372479966562	1
N.A.	XLOC_031732	endonuclease-reverse transcriptase	4.54606744629542	61.9605008779858	13.6294724198334	0.0226100237728212	0	7.39741067915524	Inf	0.454077502905126	7.7495949900436	25.4623050066343	3.28563041544072	0.27348321308166
N.A.	XLOC_034672	reverse transcriptase	10.0876027772992	84.931926679731	8.41943606967348	0.00208302110911533	4.04333932441159	2.94780110732187	0.729051130961126	1	10.8464712121873	3.50750873473685	0.323377867890871	0.695310305837899
N.A.	XLOC_007071	reverse transcriptase	26.7725755897936	106.753014056765	3.98740172377967	0.0409315299747736	8.71721302776709	16.7688277123877	1.92364551135479	0.963398955804259	41.8359658507406	25.6878512295586	0.61401358154861	1
N.A.	XLOC_006039	endonuclease-reverse transcriptase	2.06639429377065	22.6415369097593	10.9570264387656	0.0499154469131361	0	4.03248197233748	Inf	0.819873738703922	3.09391444827004	5.60336192238129	1.81109142352479	1
N.A.	XLOC_022112	retrovirus-related pol polyprotein from transposon partial	50.5645503527048	0.469039283840516	0.00927604973383149	0.0317300308989203	16.0885257870329	5.92351012549431	0.368182281204942	0.819873738703922	49.1794940660662	16.2405509809988	0.33023013533205	0.442618611034283
N.A.	XLOC_015807	tpa_exp: reverse transcriptase	28.2747739761021	0.506332444418957	0.0179075682389861	0.00683312043573736	0	0.639645354669135	Inf	1	17.5825320293831	3.58269080904495	0.203764213428289	0.262990840680915
N.A.	XLOC_025817	tpa: endonuclease-reverse transcriptase	74.6403660945399	3.86419375245945	0.051770830646316	3.70194763323106e-05	9.54284719477211	3.587446461991	0.375930410366031	0.918320540346287	68.7180118681761	17.569465482004	0.255674822428042	0.235320514475161
N.A.	XLOC_028398	gag-pol polyprotein	1.85220901195818	25.8287042185868	13.9448107917801	0.0187649373293275	2.58717077846267	1.59911338667284	0.618093478785753	1	3.62437572568355	4.11652430098077	1.13578850884849	1
N.A.	XLOC_010245	tpa_exp: pol polyprotein	81.4606256524115	1107.05841068094	13.5901044438906	1.87742392357488e-08	81.4633628902307	178.524486710949	2.19146964202184	0.263429678732778	195.428693367142	335.79934857011	1.71827044833821	1
N.A.	XLOC_004083	endonuclease-reverse transcriptase	1.85220901195818	28.2857801195247	15.2713759283681	0.0116775953105144	0	0.319822677334568	Inf	1	1.03130481609001	0	0	1
N.A.	XLOC_020972	tpa: endonuclease-reverse transcriptase	379.545542938712	117.396017640022	0.309306800788802	0.0287670561472461	119.159720582583	124.128214716484	1.04169608748333	1	328.283384662584	253.700281823995	0.772808779477989	0.830013408785238
Smp_146050	XLOC_008882	endonuclease-reverse transcriptase	1727.5438890657	72.1559865343018	0.0417679614341524	1.91419939030816e-10	290.857415615683	189.372040892736	0.651082044760233	0.725051316966288	2103.52881536735	1365.52135723906	0.649157428823049	0.301584261233446
N.A.	XLOC_006940	endonuclease-reverse transcriptase	33.8284995983554	132.746662721344	3.92410731476243	0.0445924144506812	14.5220889636363	26.9888266658529	1.85846724485944	0.871678255227203	35.1324845461556	44.3720234473122	1.26299133182619	1
N.A.	XLOC_022042	reverse transcriptase	29.3758837949061	1.44441101209999	0.049169959351162	0.00443048704452021	5.04427503155128	8.8434033219656	1.75315645293948	1	36.7297919261435	10.9773981359487	0.298869053165946	0.148628973851128
N.A.	XLOC_032119	endonuclease-reverse transcriptase	6.79646361213693	50.7939161906495	7.47358024545929	0.0139432395293199	4.04333932441159	2.87840409601111	0.711887839497614	1	16.0089188403848	6.86087383496795	0.428565720357105	0.874164043909943
Smp_062980	XLOC_028556	reverse transcriptase	13899.5764554872	3860.23973021392	0.277723550971223	0.0102574977419274	8219.88428551118	6205.84389189853	0.754979471284929	0.786661507528523	14894.5169811675	8808.46511857243	0.59138977985723	0.117414829357067
N.A.	XLOC_013036	retrovirus-related pol polyprotein from transposon	2.67876672946644	28.4191809581593	10.6090540268207	0.0252346089078682	0	0	NA	NA	3.09983799601744	4.99434635613737	1.6111636680865	1
N.A.	XLOC_024011	tpa_exp: reverse transcriptase	1.43893015320405	21.5327643428653	14.9644263795004	0.0280792449533121	6.37037705212613	6.85507024664744	1.07608547980053	1	2.06260963218002	2.85901238839411	1.38611414578354	1
N.A.	XLOC_023804	endonuclease-reverse transcriptase	1.22474487139159	16.5440262198326	13.508140843272	0.0487144371731899	0	1.27929070933827	Inf	1	0	1.25751191258666	Inf	1
Smp_034190.2	XLOC_026080	reverse transcriptase	13.5174686999199	66.90619628722	4.94960985466285	0.017009063336199	58.1137926213796	47.91534918359	0.824509071293384	1	15.5169606233294	42.8137832374931	2.75916039724452	0.756665550778092
N.A.	XLOC_027050	reverse transcriptase	13254.1927672628	4212.88975387933	0.317853363675603	0.0258649963210322	15252.9918403915	8237.92875639253	0.54008609213162	0.143424888022814	15176.891353395	12078.7225125282	0.79586275155263	0.814986851504345
N.A.	XLOC_014270	reverse transcriptase sr3-right	31.4573697935475	1.48170417267843	0.0471019726824827	0.00253880614228634	10.7190844420465	18.4931539320724	1.72525499095161	1	26.4078584436223	20.3570752819796	0.770871872304206	1
N.A.	XLOC_023318	gag-pol polyprotein	56.9326434012168	484.349524178595	8.50741323857524	1.30112737817887e-05	62.0214269015093	44.5790739192541	0.718768918200578	0.956742519320929	38.3004433412681	47.5712449130375	1.24205468039009	1
Smp_132710	XLOC_006310	endonuclease-reverse transcriptase	821.25531090813	154.316720224788	0.187903467015814	0.00101958271037047	364.989062242501	426.763607296151	1.16925040074929	1	983.824165211367	1378.32033666665	1.40098239645347	0.838798550969472
N.A.	XLOC_028702	endonuclease-reverse transcriptase	3.68932631904557	30.8174423416195	8.35313541730622	0.0243023109435423	0	1.57120547582227	Inf	1	4.65271876789986	3.58269080904495	0.770020924918723	1
N.A.	XLOC_022458	tpa: gag-pol polyprotein	2756.78120644763	412.411547054544	0.149598940274979	6.11161381353359e-05	1277.9467114912	716.137622551026	0.560381443225739	0.204351851459325	2619.70811540786	1521.4566138857	0.580773333081357	0.12911592469677
N.A.	XLOC_008681	endonuclease-reverse transcriptase	4.33188216448296	41.4561732276376	9.57001406167882	0.0121135607739116	4.6738737033555	5.03343910480136	1.07693091946146	1	2.07445672767483	9.11087065711815	4.39193092609366	0.665354343142399
N.A.	XLOC_007224	endonuclease-reverse transcriptase	9.9036009052283	54.9406834240572	5.54754618545392	0.0374834210557179	3.21770515740658	2.3360636635033	0.726003020545902	1	8.78978512775472	12.6935614661631	1.44412648109927	1
Smp_034300	XLOC_007755	tpa_exp: reverse transcriptase	170.816507958907	877.072920418278	5.13459109367388	0.00177473471464543	57.5878880009756	97.6402393826791	1.69549957069141	0.588512102205579	232.692212098593	131.356646745734	0.564508135279048	0.22800733555219
N.A.	XLOC_004516	endonuclease-reverse transcriptase	11.9096283795158	59.854835225933	5.02575171269674	0.027259767990682	8.08667864882318	40.1294643474207	4.96241610308833	0.10707758621817	11.8925848976459	30.9510040746087	2.60254640525925	0.356335195429489
N.A.	XLOC_013608	tpa: endonuclease-reverse transcriptase	58.1846702687287	11.0116624918025	0.189253671816728	0.0211984285927283	29.3043109780208	47.8466977039106	1.63275286492138	0.800441588887947	49.1232203624659	49.0975633145368	0.999477700204919	1
N.A.	XLOC_030249	endonuclease-reverse transcriptase	337.186202941607	2644.70474830723	7.84345481883562	2.25806697346473e-05	135.307641113396	115.660449893554	0.8547961441189	1	383.43449813241	238.869292825402	0.622972877998354	0.820855799904896
N.A.	XLOC_011760	endonuclease-reverse transcriptase	36.845086662222	288.417435833396	7.8278398006624	0.000200295433608647	34.9593221405896	52.4064478558835	1.49906933678891	1	49.1113732669711	63.5467688910132	1.29393182604711	1
N.A.	XLOC_001067	endonuclease-reverse transcriptase	10.8537936753242	49.7812513018116	4.58653009177682	0.0379403420271436	2.08670292489283	3.33702079596719	1.59918345642736	1	10.8672036293033	4.46051286420156	0.410456361761167	0.837715867541008
N.A.	XLOC_033726	endonuclease-reverse transcriptase	183.317029605241	42.5219030807332	0.231958281084419	0.0133248604565597	100.107984169984	163.464167433742	1.63287842412428	0.555182139159182	124.609872560449	238.172070805978	1.91134190182596	0.140660892528068
N.A.	XLOC_026100	tpa: endonuclease-reverse transcriptase	7.16446735627867	73.6592120638794	10.2811846856036	0.000564540176096871	6.6955433655613	6.60464458062363	0.986423986826042	1	4.65568054177356	10.0638747865828	2.16163344891981	0.968451442754184
Smp_005060	XLOC_004706	tpa: gag-pol polyprotein	973.222344794011	220.161459356152	0.226219075768087	0.00368440203163742	1041.2445806831	709.388058074485	0.681288595623803	0.626702806083369	983.892589764483	943.577412566794	0.959024818748417	1
N.A.	XLOC_032501	tpa: gag-pol polyprotein	73.337261285173	756.681950825541	10.3178375844057	7.13320110458608e-06	14.2619559128882	38.8916627385426	2.72695154690509	0.437724789673411	108.067530668776	122.06349013168	1.12951123594931	1
N.A.	XLOC_031963	endonuclease-reverse transcriptase	5.55662703587455	46.7274848316186	8.40932539289354	0.0102666356424709	0.695567641630943	1.47390055366093	2.11898953523051	1	4.64975699402616	4.2311871553877	0.909980276565802	1
N.A.	XLOC_002506	rna-directed dna polymerase from mobile element jockey-like	2.47967315252478	26.4096229841627	10.650445183581	0.03761443736879	7.39111100719224	13.7101404932949	1.85494988235918	0.962346840723888	2.57826204022503	2.93419446270221	1.13805129848094	1
N.A.	XLOC_034092	gag-pol polyprotein	7.80702320171606	101.193379418615	12.961839206059	9.86883722672497e-05	3.28273842009362	5.50638252599841	1.67737474673397	1	6.72125194782729	19.0995633693929	2.8416675223084	0.570190422981916
N.A.	XLOC_030695	endonuclease-reverse transcriptase	572.25654153396	5502.98731520789	9.61629429426334	2.44943138871929e-06	1009.49745204451	1154.49558783725	1.14363397896555	1	1021.09330373655	1995.05681360715	1.95384379302707	0.106418055311974
N.A.	XLOC_005983	reverse transcriptase	34.7485089587097	136.744257312438	3.93525539397751	0.0275925809430251	25.696406244492	50.6971938890711	1.97292934298694	0.605065793341701	53.7907479997342	44.4829068158295	0.826962042172183	1
N.A.	XLOC_001937	reverse transcriptase	73.6628913283236	3.3578613080405	0.0455841638508885	3.72944433168523e-05	11.759616645039	20.6625156621036	1.75707391540017	0.918320540346287	86.4338237218758	58.3230968260619	0.674771684447656	0.871167103149108
N.A.	XLOC_016483	endonuclease-reverse transcriptase	19.7317432861026	0.975371728259473	0.0494316044009372	0.0200227726811783	3.28273842009362	15.8236864016249	4.82027026727695	0.501086961919189	23.752590282681	14.4454260905867	0.608162138051929	1
N.A.	XLOC_010567	endonuclease-reverse transcriptase	5.32735004919128	50.3091051031298	9.44355160419145	0.00346673300123941	21.1978340812712	26.5437911555064	1.25219355212137	1	7.75848031166471	9.71988622336206	1.25280800271523	1
N.A.	XLOC_033563	tpa_exp: reverse transcriptase	3.88841989598723	27.630275032792	7.1057848102531	0.0389678583364217	0	0.959468032003703	Inf	1	4.13706635985486	6.78569176065985	1.64021825381063	1
N.A.	XLOC_033816	tpa: gag-pol polyprotein	6.9804654842078	49.2749188573926	7.05897321158156	0.0128644435170987	5.56454113304755	7.0496800909701	1.26689333808719	1	1.03426658996371	4.00186144657384	3.86927460038542	0.987368202885976
N.A.	XLOC_020849	endonuclease-reverse transcriptase	53.24041566855	274.532723121073	5.1564721964266	0.00291932860889363	45.6331715678755	42.0340736901872	0.921129788834973	1	72.8432311325362	125.946909237957	1.72901321481471	0.406485099356481
N.A.	XLOC_000674	tpa: endonuclease-reverse transcriptase	6.13881606182874	55.4470158684762	9.03220023373019	0.00247980673488836	1.32610202057485	3.0451060294832	2.29628337958732	1	3.62733749955725	3.278183025923	0.903743593289327	1
N.A.	XLOC_013642	tpa: endonuclease-reverse transcriptase	22.5190533632859	198.07504715783	8.79588693016567	5.25569446723048e-05	14.3467874235017	25.0004935905347	1.74258479285621	0.936698677721862	9.82997526546584	10.5582274984198	1.07408484897337	1
N.A.	XLOC_008268	tpa_exp: reverse transcriptase	3.29113916516224	38.1513768838548	11.5921493954736	0.00754616689985987	7.32607774450521	13.4182257268109	1.83157020642799	0.9693132744327	4.12521926436005	11.0920609903556	2.68884155714724	0.800616059186553
N.A.	XLOC_030694	reverse transcriptase	95.8412229435881	401.391339168263	4.18808657527796	0.0115876332012629	92.6066048853444	114.338924552125	1.23467353860653	0.98869143026708	187.134131984337	225.961523593983	1.2074842851912	0.998227091085335
N.A.	XLOC_006609	reverse transcriptase	42.9206344909462	228.189669001679	5.3165492940188	0.00570739578712187	40.8688278349987	78.5768371072483	1.92265942699628	0.522939001223572	56.8402358398988	69.7910681879581	1.22784621064096	1
N.A.	XLOC_015237	endonuclease-reverse transcriptase	70.3717521631614	536.146083007623	7.61876841952911	4.76985808473118e-05	88.3483675249453	120.91715228516	1.36864048168201	0.842969113554999	81.6596722251542	122.815310874761	1.50398976052869	0.650473949738358
N.A.	XLOC_000947	endonuclease-reverse transcriptase	40.5042295715259	7.25934822107839	0.179224448850686	0.0354330599276733	26.5418386594235	19.5363456966279	0.736058490420053	1	58.9768898189213	64.5354743146871	1.09425021415732	1
N.A.	XLOC_006656	gag-pol polyprotein	40.9326001351509	383.519054115305	9.36952582657846	2.61790903242404e-05	61.8517638802824	68.0076165023352	1.09952590251052	1	43.4155025874864	56.9076617930799	1.31076823718453	0.986671618185157
N.A.	XLOC_013250	endonuclease-reverse transcriptase	23.2068843233357	276.2970007747	11.9058205713926	5.20408451816276e-06	8.02164538613615	26.5302099658968	3.30732769760043	0.446883750989269	17.0639178474644	28.6258251781504	1.67756463867434	0.850183261482643
Smp_005020	XLOC_023944	tpa: endonuclease-reverse transcriptase	4121.68973168665	1041.81315796009	0.252763605652037	0.00572516508031115	3558.94681663849	2600.13291960392	0.730590552083554	0.736041593971765	4221.77992469782	3464.85967365184	0.820710632826235	0.978333883283245
N.A.	XLOC_013037	pro-pol polyprotein	4.33188216448296	34.942688218128	8.06639859796341	0.0325079467940366	1.26106875788782	0.639645354669135	0.507224804887313	1	5.18318004531338	4.76502064732352	0.919323775301234	1
N.A.	XLOC_023808	endonuclease-reverse transcriptase	26.4678400787564	1.40711785152155	0.0531633048762045	0.00955657384809864	0.695567641630943	2.87840409601111	4.13820874309496	1	20.6764464776532	15.5130930744584	0.750278491578556	1
N.A.	XLOC_032662	tpa_exp: pol polyprotein	19.6864681714902	1.44441101209999	0.0733707539370507	0.0423454509220202	7.63144581001395	8.77400631065484	1.14971743613008	1	12.9150043921148	27.1784683368487	2.10441030538421	0.646372996520034
N.A.	XLOC_022979	reverse transcriptase	13728.116178869	1955.67190326852	0.142457412057657	0.00167992485068436	16818.3990632016	7094.49179684688	0.421829198497823	0.0175973864932352	10400.5524771502	11120.8924276512	1.06925977750544	1
Smp_206010	XLOC_034548	endonuclease-reverse transcriptase	4696.11365412456	5263.09861927892	1.1207349325237	0.916080133613479	6712.61841359946	2885.69249745184	0.429890740043492	0.0241532101266232	5361.34539426644	4027.55087303006	0.751220183899591	0.689142366036833
Smp_069770	XLOC_018495	endonuclease-reverse transcriptase	3016.03761449943	3140.81443615976	1.04137110925291	0.96864348473369	4809.60775039567	2278.91037353703	0.473824580258038	0.0442737259435541	2494.00770255384	3024.23783745588	1.21260164287347	1
Smp_000460	XLOC_029473	endonuclease-reverse transcriptase	9107.71215041852	7723.92419651699	0.848064153648296	0.882974550646978	15938.6611544095	6796.85921400553	0.426438528817407	0.0202309490801121	10399.71551016	9265.60514948781	0.890947943762093	1
Smp_056440	XLOC_025746	tpa: endonuclease-reverse transcriptase	9447.3576295365	2442.02655485317	0.258487785750626	0.0734215125387808	9410.08170798015	4451.18216932181	0.473022690711285	0.0489753972701988	8788.34297186591	6357.57369634861	0.723409830123959	0.536128766035
N.A.	XLOC_013477	tpa_exp: pol polyprotein	17625.9717675998	12980.0757920657	0.736417598031434	0.921861681070067	29092.2988977889	13227.4986116533	0.454673542923713	0.0323379819688847	15012.1792919496	12104.4267599791	0.806307100693244	0.857609177305916
Smp_129770	XLOC_027110	tpa: endonuclease-reverse transcriptase	5857.00643339757	1481.94106547502	0.253020221563146	0.00418615915392776	7466.10161164552	3119.02798554161	0.417758577070073	0.0195669879711219	6928.37531898425	5239.37353842229	0.756219647060116	0.706312613164893
Smp_061650	XLOC_006747	tpa: endonuclease-reverse transcriptase	6805.12200588402	2971.47843660161	0.436653220035193	0.447190805312299	12706.2366515717	5108.40914810526	0.40203950927306	0.00874140108515537	5397.16470659727	5339.54898475036	0.989324816829013	1
Smp_059240	XLOC_029780	endonuclease-reverse transcriptase	7698.67441971476	3562.93533879782	0.462798547458229	0.278503169843022	6626.22905771124	2630.33536853648	0.396958110808959	0.00734803922601844	6035.69693174013	3329.79980019208	0.551684393343467	0.066316069983957
Smp_203810	XLOC_023887	tpa: endonuclease-reverse transcriptase	3973.87752842375	1441.88478368971	0.36284077034997	0.0577970290153811	3496.66512982273	1533.22219915471	0.438481279227456	0.0284693091292646	3645.26223011855	2560.04545720288	0.702293907980284	0.47123377075574
N.A.	XLOC_025641	endonuclease-reverse transcriptase	4524.49436262368	1100.93215222492	0.243327113261448	0.196900806261788	4001.55363119908	1741.16829720579	0.435123069107546	0.0198110474862575	3052.85256888375	1973.16208146601	0.646333891645307	0.277905493639134
N.A.	XLOC_033663	reverse transcriptase	2271.85360344357	736.835924103183	0.324332484710425	0.0348595623621339	3952.91777937328	1717.7877918876	0.434561983770873	0.0286807975875684	2474.85778463723	2475.07603961071	1.00008818889507	1
N.A.	XLOC_034228	retrovirus-related pol polyprotein	1467.4283795694	573.868509609474	0.391070881277266	0.397492410567566	1576.04249064957	710.605568709071	0.450879702117797	0.0376888873145138	1623.16503038808	957.677164172957	0.590006035272943	0.571217814267641
N.A.	XLOC_026430	tpa: endonuclease-reverse transcriptase	1509.05229671498	487.872329932629	0.323297165376353	0.0932952942124071	2992.6784460504	1348.01099681409	0.450436296820708	0.0286807975875684	1361.64572233276	1856.78132246039	1.36363026887741	0.922257094531504
N.A.	XLOC_025458	reverse transcriptase	4362.7758141548	1880.6070502091	0.431057457526826	0.148465630966525	4242.12943831036	1664.25773390163	0.39231658489056	0.00629598207716034	3714.51662681189	2220.31524213114	0.597740019819698	0.146318552863914
Smp_120960.2	XLOC_013442	rna-directed dna polymerase from mobile element jockey-like	1253.04346308363	834.496475517306	0.665975682490443	0.736343544036126	2374.4774523509	1105.80478140289	0.465704477550658	0.0420191777543502	946.214422690713	1033.25010075434	1.0919830389143	1
Smp_084180	XLOC_024539	endonuclease-reverse transcriptase	1420.30937148095	588.590920514183	0.414410361807628	0.182757985822918	1738.35572447131	814.443178604331	0.468513530998972	0.0484218948753248	2082.89239072016	1012.76702416029	0.48623108359915	0.401291494016508
N.A.	XLOC_006847	endonuclease-reverse transcriptase	3792.11492265	1178.2948862925	0.310722356871264	0.105144925160397	9665.60965385404	4099.20754019379	0.424102326391722	0.0163440990852649	3164.82227451429	3714.29178874852	1.1736178105984	1
Smp_027920	XLOC_033047	gag-pol polyprotein	3203.84441541863	5171.08231107456	1.6140241661513	0.403580893872531	33388.4529552332	13144.4888899106	0.39368367583651	0.00813571925751888	3727.35910562727	6392.67146061131	1.71506723110209	0.464596857682945
Smp_082990	XLOC_001907	reverse transcriptase	3656.01732487682	2000.21765927095	0.547102894086624	0.38454198894282	6954.64161431958	2721.5298867152	0.391325684002406	0.00828496807075494	3480.09944730272	3208.64268208147	0.921997411472927	1
Smp_134060	XLOC_009334	endonuclease-reverse transcriptase	2377.93683226355	1123.05585758382	0.472281619236615	0.194314217610888	4319.5696407146	1772.0431948848	0.41023605180067	0.0139644999863267	2690.30214515417	2551.60744572865	0.948446422765064	1
Smp_137540	XLOC_027680	reverse transcriptase	13734.0065337819	4322.28514852535	0.314714073995357	0.172186359641476	14959.6572685478	5028.65197789434	0.336147539186404	0.000920148342853041	10371.8157531798	5621.72304168269	0.542019177303568	0.0554903585944165
Smp_036550	XLOC_022416	endonuclease-reverse transcriptase	3396.61868224698	1405.29265101165	0.41373282740175	0.123925094176364	2961.55896909955	1154.01950066928	0.389666224009092	0.00863879459612832	3226.40825912826	1817.56116084612	0.563338863178217	0.0794936644228546
N.A.	XLOC_003997	endonuclease-reverse transcriptase	3357.30786663378	2545.83356709494	0.758296131372525	0.765392810747035	2314.26580663031	874.100626180189	0.377701050448014	0.00723842922125635	2910.31956029844	2313.88524443807	0.795062259142702	0.920025859501821
Smp_170030	XLOC_025958	reverse transcriptase	7154.90103461148	1465.68388543338	0.204850336621458	0.0454809853614503	3988.85247359068	1626.90100625987	0.407861914430585	0.0106233373430666	7114.35413117016	2815.71518325896	0.395779452546853	0.0006181172977866
N.A.	XLOC_004452	tpa: endonuclease-reverse transcriptase	1409.80500379451	148.442968498332	0.105293262613479	0.0387589081592645	768.14099205398	323.758016004989	0.421482539474	0.0238542067770018	1179.29819644868	612.971500174519	0.519776509470135	0.0415568590979067
N.A.	XLOC_029389	uncharacterized transposon-derived protein	2300.55267729614	1026.34488384381	0.446129703515455	0.368284900119999	1502.14554030667	695.402727751086	0.462939648051091	0.0411110996760674	2219.09449400093	761.230218626466	0.343036414485443	7.31572542344965e-05
Smp_115450	XLOC_026112	tpa: endonuclease-reverse transcriptase	2728.66022916366	652.282678582457	0.239048699288729	0.0131157213687262	2075.81328938507	706.198193769329	0.340203137430791	0.00191385866272782	2349.24857926526	1129.40775240532	0.480752765958274	0.0258977799164408
Smp_134440.2	XLOC_022272	endonuclease-reverse transcriptase	6239.88949457899	342.520421065068	0.0548920652140777	2.47007799559177e-06	5498.70640432536	1540.36396544642	0.28013206237648	0.0104708203741123	5425.73587498478	2333.79372848237	0.43013404674604	0.00284824872803145
N.A.	XLOC_023349	endonuclease-reverse transcriptase	3685.78386085828	811.322812108989	0.220122189129143	0.00232745100830984	4340.90029714895	1201.71680528748	0.276835845798337	0.000114258864365044	3479.43244067309	1689.21726247981	0.485486438171229	0.0171643549221761
Smp_168090	XLOC_006771	reverse transcriptase	3561.28476848958	1555.01213236413	0.4366435804637	0.145280709124482	6220.47304156457	1614.10420988808	0.259482550459234	3.25666056185102e-05	3431.72350521849	1556.42837683633	0.453541310793113	0.00635900916560402
Smp_036570	XLOC_022422	reverse transcriptase	725.606209440712	289.552002454429	0.399048407644708	0.104780186189742	520.431451158544	202.287178692605	0.388691302653384	0.0223380122566609	720.673527259676	310.810812924662	0.431278243432229	0.00777654192645091
N.A.	XLOC_000001	flap endonuclease 1	1463.10985696969	176.40888197633	0.120571180035447	1.46624771453249e-05	2705.31616479009	495.686058983259	0.183226665125006	0.00608274014657745	1553.02384829042	661.634774907969	0.42603001598224	0.00313858844543338
Smp_186980	XLOC_000002	flap endonuclease-1	1402.32477990947	161.154344573064	0.114919415874165	9.5916242075957e-06	2567.49478050753	551.956795814745	0.2149787411469	3.3951690628595e-05	1387.01073261881	711.933565490232	0.513286270068026	0.0341481488675602
N.A.	XLOC_023285	tpa: transposase	1090.98997392377	581.971305576159	0.5334341464964	0.758036518957985	2847.48286631737	728.245667531123	0.255750675849705	0.00716731366688684	865.08255372312	388.382151347529	0.448953859577933	0.00683062094905327
N.A.	XLOC_030009	reverse transcriptase	432.249044695921	63.3030546588096	0.146450421199524	0.000143963508526942	396.281084905783	113.560485174834	0.286565494797294	0.0334167212191988	410.663375447089	94.580514011709	0.230311539003787	0.254826622973165
Smp_066430	XLOC_029999	endonuclease-reverse transcriptase	1979.59406246719	658.870749913123	0.332831241720317	0.0499889730947939	4503.85809821516	1125.77092873675	0.249957015560256	2.58768665992592e-05	2157.95634474993	1414.19974991607	0.655342149694855	0.692824674771409
N.A.	XLOC_000004	flap endonuclease-1	1497.73124482543	292.696127049458	0.195426334371207	0.00171347555192508	3009.77091709927	793.063258108057	0.263496219463901	5.59873034156936e-05	1462.50627013842	884.252585938186	0.604614560629881	0.161337579754651
Smp_120320	XLOC_033274	endonuclease-reverse transcriptase	6063.646403871	2248.65487649617	0.370842019260991	0.0614070531566227	17554.6024856091	3389.69511386857	0.193094381752442	3.40017998504234e-07	5468.27674301746	4477.56285419549	0.818825210321143	0.905480736461588
Smp_210580	XLOC_025997	endonuclease-reverse transcriptase	2006.83099485759	610.869548068618	0.304395113307469	0.0564179188927472	2813.66895986531	733.23298272543	0.260596748652525	5.5422940126038e-05	1908.33676015609	898.987401868337	0.471084255482668	0.146318552863914
N.A.	XLOC_013154	tpa: endonuclease-reverse transcriptase	231.809382836932	109.620314724065	0.472889895061661	0.236246734756372	250.678516903408	86.6825446207521	0.345791676492776	0.0201868312436831	205.792395437916	114.084130075073	0.554365139840602	0.24320189570382
Smp_091840	XLOC_006667	endonuclease-reverse transcriptase	3901.98907080617	1275.94689231214	0.3269990943487	0.0318390979041833	5459.96938756651	1343.71509189751	0.246103045001942	5.81342690522434e-05	4034.0270857279	2242.11758068973	0.555801320378384	0.0763981885852656
Smp_022110	XLOC_029365	Endonuclease-reverse transcriptase	2809.96879026403	2303.89833577279	0.819901752558722	0.872787504867137	6154.3716883975	1544.90938887715	0.251026338202758	1.70485737605506e-05	3219.37184413374	2116.20846631067	0.657335830953102	0.321909336977172
N.A.	XLOC_022857	gag-pol polyprotein	3327.51002150946	1236.1073009518	0.371481165484534	0.0484497736974465	1723.23981493338	483.134631176324	0.280364129814979	0.000127870940245955	3866.0666416175	1147.23427827508	0.296744568736947	0.102227688903823
Smp_052150	XLOC_016291	uncharacterized transposon-derived protein partial	266.210782583614	160.893292449015	0.604383079030542	0.51602622383816	465.572077499221	192.66608152498	0.413826539082561	0.0423436486467374	221.475215398173	455.393168707291	2.0561811753454	0.192321093610816
Smp_174910	XLOC_022572	tpa: gag-pol polyprotein	2619.04149248696	3798.82464753832	1.45046371294067	0.520577670127334	30744.1224356161	8207.94914845563	0.266976205472919	3.84903706100205e-05	2261.57050676241	3954.80206282983	1.74869722213144	0.160291134497673
Smp_122490	XLOC_006161	tpa: endonuclease-reverse transcriptase	415.132215269415	146.225423364544	0.352238197822459	0.134462906887374	578.720545320059	232.155900517732	0.40115372159345	0.0286656600656925	478.646259886546	287.004607117492	0.599617360815733	0.219315799258474
N.A.	XLOC_007230	endonuclease-reverse transcriptase	988.364477659299	476.645453871834	0.482256763214167	0.75110287075419	475.431569797317	164.825690812369	0.346686466114643	0.00539064623426328	626.528611608115	352.017630279254	0.561854037879816	0.182534901390317
Smp_131190	XLOC_020661	Transcript containing mobile element	5129.4521812146	2778.02921821149	0.541583997680174	0.410552728924537	19655.5338807227	4840.61993901358	0.246272625734224	9.44903616298625e-06	4251.41118014443	6160.90161222267	1.44914273194657	0.56991349077619
Smp_096210	XLOC_033872	endonuclease-reverse transcriptase	2390.61845436833	710.21404126199	0.297083811080028	0.0194903410752492	2688.5149020777	943.119798878073	0.350795823429962	0.00238974066405931	2248.77366957122	1276.51606282731	0.567649861833674	0.0918676827214906
Smp_105080	XLOC_032243	endonuclease related	1652.43568012017	2374.20232449919	1.43678955439072	0.574667222141052	5378.33034254565	1803.27642221508	0.335285545395034	0.00119198031148114	1629.0406580118	2091.58491022258	1.28393659172098	0.937814360461615
N.A.	XLOC_032844	reverse transcriptase	3289.78610814414	1345.21832951949	0.408907535413711	0.107642279681694	4260.34451724514	1367.76075226607	0.321044635411435	0.000708117282991822	3086.44667777337	1708.89391960713	0.553676799898568	0.0775640302058458
N.A.	XLOC_031358	transposase domain-containing protein	1666.76461483272	992.04915531794	0.595194514264093	0.467485072218061	1288.79861828633	427.569209052661	0.331757966672237	0.00126448061195121	1602.6861114979	948.921212893245	0.592081759544522	0.16281946423486
Smp_164440	XLOC_022544	endonuclease-reverse transcriptase	5538.7718168723	2295.00663388074	0.414352984697736	0.110619302469877	9273.73366152725	2608.96141229326	0.281328050547399	8.50331210237235e-05	5576.20620956392	2977.69983651022	0.534001025895182	0.313165967908993
Smp_171190	XLOC_008640	endonuclease-reverse transcriptase	9775.82782093376	3484.20969070708	0.356410705520618	0.198217358470767	26053.3315627519	6830.90728753437	0.262189396817889	0.00327331343960001	7652.13334362887	8459.98180572535	1.10557166554986	1
N.A.	XLOC_026145	endonuclease-reverse transcriptase	1166.98859345669	431.102804784247	0.369414754524118	0.171003032198223	1316.40642591558	531.271752583456	0.403577301146908	0.0119502596595283	943.114584694696	576.368408504448	0.611132960785491	0.416828077126566
N.A.	XLOC_013091	endonuclease-reverse transcriptase	1697.38787017123	804.366081869778	0.473884664787098	0.609777283158836	4004.93798982301	1510.17020222254	0.377077049896915	0.0191028954147775	1213.01108004727	1355.85438381816	1.11775927369544	1
N.A.	XLOC_011193	reverse transcriptase	1433.58188685255	1292.18239312619	0.901366294438328	1	3734.26068388823	1382.01323319187	0.3700901865675	0.00401288583765839	1568.76058768845	1538.2389649739	0.980544116830775	1
Smp_041740	XLOC_015675	tpa: endonuclease-reverse transcriptase	14350.6133728526	6852.43227422305	0.477501002653028	0.226681981713852	51847.8999597674	14332.2124246976	0.276428021883607	7.29519046876602e-05	15775.4015090802	15509.3181684196	0.98313302260437	1
Smp_121140.2	XLOC_030047	reverse transcriptase	1171.82198793229	1091.59013656466	0.9315323895661	1	1376.6466448212	542.423311658074	0.394017821275062	0.0108098205978505	1189.95450662491	735.138314702937	0.617786907491133	0.221620697934776
Smp_129950	XLOC_030162	tpa: gag-pol polyprotein	7547.81200346827	7582.99455982529	1.00466129208582	1	21385.2027414402	6596.79257805462	0.30847463350307	0.000869585397491357	6402.18742598379	9741.05129333744	1.52151923166176	0.483049254591009
Smp_165660	XLOC_019274	endonuclease-reverse transcriptase	60.1332323371543	1227.85385548682	20.4188899842022	5.13957601208245e-10	16.8491266913509	9.87226836528006	0.585921665028952	0.933139524870848	61.5107252510408	13.2273949580989	0.215042090694177	0.00557868761553436
N.A.	XLOC_025974	endonuclease-reverse transcriptase	170.728859143303	108.719529316963	0.636796437711258	0.544342288757684	60.6302916182475	26.2526219206538	0.432995145165238	0.430805135362223	241.591582859675	72.879406285166	0.301663681418474	0.000577629619732552
N.A.	XLOC_029751	endonuclease-reverse transcriptase	311.641273636826	460.061338650165	1.47625291503044	0.587908016846917	40.5888965363242	55.075915386331	1.35692073661185	1	228.90790058373	53.3644517641338	0.233126299389628	0.0462963672086515
N.A.	XLOC_025225	tpa_exp: pol polyprotein	168.858657012853	45.9385789062513	0.272053442322206	0.0206854364951533	55.5860165866962	53.5197821633811	0.962828161645789	1	207.366008626914	71.9621034499106	0.347029409141893	0.00514293926087124
N.A.	XLOC_027468	tpa_exp: gag protein	88.9269271061061	143.470002178979	1.61334712496916	0.456543926596089	52.1986484080627	33.5376554247754	0.642500456383371	0.896286354562685	83.7992879780505	28.2856161008191	0.337540052944459	0.029123725193082
N.A.	XLOC_023786	RNA-directed DNA polymerase from mobile element jockey-like	682.25430297252	1253.67976386415	1.83755493868193	0.284859575145797	10.4787496392248	27.0725503984046	2.58356686918684	0.619326027408562	611.930104639654	101.967662366834	0.166632858219779	1.20118564938697e-10
N.A.	XLOC_026098	reverse transcriptase	441.558266283945	151.011923881005	0.341997728073098	0.0480077941135194	498.883013997004	151.218073962655	0.303113294539957	0.237890574449327	723.66674139624	258.395585804103	0.357064337799407	0.00138458140243674
N.A.	XLOC_006835	endonuclease-reverse transcriptase	176.777124975907	0	0	1.17859953063273e-13	23.4146035315381	37.2088256193181	1.58912900528937	0.934583583111524	175.774970137978	74.9752594728105	0.426541158925853	0.0447482742971306
N.A.	XLOC_029394	reverse transcriptase	134.236684520352	71.4847096438898	0.532527378036156	0.391115030169967	66.0449679779945	37.9601026173895	0.574761466006577	0.668964827155827	136.057887623018	54.6614444568193	0.401751382531179	0.0392197314695525
N.A.	XLOC_017849	endonuclease-reverse transcriptase	235.658915082314	42.1116783143703	0.178697582052693	0.0397836880807152	46.2184709320588	79.2436448411366	1.71454492636991	0.643465816433335	316.458920564033	108.16870139779	0.341809613724897	0.00184625047746976
Smp_015480	XLOC_022948	endonuclease-reverse transcriptase	10672.0306155349	8.66646607259993	0.000812072827076081	1.52471833572666e-31	1102.70890081496	552.973732351958	0.501468458215291	0.075564770627004	9371.35310207534	1580.64619430925	0.168667872941337	5.13435818491413e-06
N.A.	XLOC_016530	gag-pol polyprotein	155.105523862243	38.940282809222	0.251056711840945	0.165342643098856	26.45700714881	34.5808471893308	1.30705816401785	1	117.962664959464	45.7404187284162	0.38775335182648	0.0433381048689332
Smp_162320	XLOC_018927	endonuclease-reverse transcriptase	602.301093896895	32.6935994769816	0.0542811557346735	0.0418478038315218	60.0393537351564	73.903218716979	1.23091296157148	1	390.262373939691	152.536945359213	0.390857421942463	0.0272013242334673
N.A.	XLOC_012157	tpa_exp: pol polyprotein	334.965990185507	47.8893223627703	0.142967715427613	0.000170586058104714	84.8507310688641	47.2900305501618	0.557332034202293	0.539937452303689	264.126276572223	107.875532072337	0.40842408211831	0.0128445009464211
N.A.	XLOC_001988	reverse transcriptase	461.923276537857	4.40781935745685	0.0095423192147703	1.12803470146401e-14	11.5645168569779	54.7153491401676	4.7313130169509	0.0574005012289731	526.924767186965	206.692698646526	0.392262257380639	0.00483090377425765
N.A.	XLOC_006852	endonuclease-reverse transcriptase	300.880931604348	264.182315269223	0.878029437959257	0.971714098264524	44.1317680071659	61.0280789543072	1.38286050412478	0.948565164590323	299.412773359811	116.326567925444	0.388515715679409	0.00889266053509826
N.A.	XLOC_029195	Endonuclease-reverse transcriptase	620.350122975004	2.49436906151634	0.00402090524227534	5.32703281578558e-18	61.5916308295343	103.728960378383	1.68414050710024	0.772444564327494	795.125912867695	329.889792943404	0.41489000371479	0.00304685348352057
Smp_160360	XLOC_029888	endonuclease-reverse transcriptase	9731.78286531504	4.87685864129736	0.000501126947527666	1.45800254607136e-12	4197.72312379643	2345.8554144524	0.558839958060598	0.4986779256547	8862.36559650822	2529.35570064541	0.285404125241908	5.2887453373786e-07
Smp_006290	XLOC_022461	endonuclease-reverse transcriptase	2467.77681839944	1065.83174596999	0.431899569694993	0.114437196628915	1246.92334308878	577.342035904137	0.463013255068264	0.112217496205129	2848.85235039344	966.524286104772	0.339267946256074	0.0136522672618853
Smp_174690	XLOC_019942	endonuclease-reverse transcriptase	1420.11900391507	393.624181646785	0.277176898951157	0.0132417138992912	483.721869444313	357.313725809162	0.738675979689806	0.807143299656784	1838.86676147801	730.098614516125	0.397037256755514	0.00132874937264159
Smp_165210	XLOC_032823	endonuclease-reverse transcriptase	3180.67353910248	262.113942777749	0.0824083136968883	1.75150571469944e-07	933.414680673581	830.300737169857	0.889530403111602	1	3911.95461788149	1520.21044043078	0.388606358949545	0.000562328420478143
N.A.	XLOC_022153	gag-pol polyprotein	620.373918920738	311.308525760765	0.501807887575846	0.424905698844323	215.083021864967	141.022255261884	0.65566428274576	0.723564738935233	553.8068132044	254.279061503122	0.459147586198569	0.0217307415524405
N.A.	XLOC_007255	endonuclease-reverse transcriptase	453.156771688417	161.240430000661	0.355816000277111	0.0768550976423812	51.9781118531674	82.9691397941178	1.59623227616457	0.754100593063663	547.56271060426	270.681315090406	0.494338474567958	0.0410706944370296
Smp_012150	XLOC_025631	endonuclease-reverse transcriptase	2585.73308295498	1323.65977112248	0.511908897267076	0.286636685396314	1499.70836116501	788.919890023949	0.526048870869199	0.162745850539244	3183.45243899924	1266.76384715214	0.397921398678212	0.0010334549630758
Smp_181050	XLOC_000072	reverse transcriptase	6885.9058869047	2158.17349529945	0.31341896487487	0.0235360494417712	5203.25418113452	4240.89196837953	0.815046088610424	0.936660844746228	8875.21103709747	4716.74380613231	0.531451453539167	0.0436447692995386
Smp_043500	XLOC_025557	tpa: endonuclease-reverse transcriptase	5925.10914632903	1854.6649896528	0.313017860743017	0.156143058314563	2677.97374814	1505.84282335719	0.562306790499005	0.167793117332838	4714.86300900586	2456.22975714318	0.520954639074676	0.0351118001647817
Smp_045710	XLOC_018078	endonuclease-reverse transcriptase	3734.38244066083	5276.47684167612	1.41294495824118	0.622611066597804	2263.0766151395	2082.28700968383	0.92011335177686	1	4768.36145265416	2476.16010281586	0.519289514312633	0.0409606975109789
Smp_141860	XLOC_025284	endonuclease-reverse transcriptase	3315.09134585148	2056.2672731326	0.620274694905715	0.399137944346206	1804.61283465759	1316.58763282928	0.729567920356218	0.703029275397674	4039.19279888399	2087.05973845477	0.516702183424226	0.036597591418584
Smp_190020	XLOC_025657	endonuclease-reverse transcriptase	5012.21102961522	2984.45249952708	0.595436321793536	0.442451567845958	2709.26878035798	1605.33036519767	0.592532707288481	0.245409128338803	4920.77387539872	2467.48101953166	0.501441659790092	0.0265383078241416
Smp_059920.3	XLOC_023119	endonuclease-reverse transcriptase	3758.55865837608	3217.16761692117	0.855957804397064	0.966634232460616	3110.39340198835	1623.83411819283	0.522067117669032	0.0978011754126835	3563.23499417904	1778.8282006154	0.499217201088709	0.0200956001963371
Smp_150380	XLOC_001284	endonuclease-reverse transcriptase	2682.93429147704	408.253280714696	0.152166708671028	0.00176764833867945	1087.15480085845	888.017466644154	0.816827066341381	0.929121318992635	2256.366898054	1104.69895406297	0.489591898824484	0.0184280023398493
N.A.	XLOC_022064	endonuclease-reverse transcriptase	1538.25519965554	270.134926014076	0.17561125492998	0.212372555225454	1328.11215947225	345.337765067005	0.260021537039637	0.227251329373234	1081.86358551916	561.749941349908	0.519242859145071	0.0392197314695525
N.A.	XLOC_027647	gag-pol polyprotein	830.098421785252	1319.73249015531	1.58985061954102	0.406095736661472	476.064986867464	318.140001835588	0.668270111458875	0.556856640494661	766.930889762147	377.271192927726	0.491923324466343	0.0285916534960797
Smp_011220	XLOC_008856	endonuclease-reverse transcriptase	810.505989893373	728.127892172766	0.89836213581661	0.985246215386322	123.007960118934	194.165653394598	1.57848039433272	0.64114224241606	766.166448348711	382.601968875305	0.499371865865325	0.0361256332025406
Smp_165800	XLOC_025883	endonuclease-reverse transcriptase	5490.6126721915	2551.00449832363	0.46461199334708	0.153477804124212	2574.23267619665	1658.30407927039	0.644193547306099	0.390874875214012	6174.49362470059	2595.31713316378	0.42032874125603	0.00201549193331086
Smp_007700	XLOC_022255	endonuclease-reverse transcriptase	1493.00409869088	521.260204512902	0.349135146360255	0.127679510957472	510.953637226459	462.167365089758	0.904519180249854	1	1962.72965951424	928.774565890632	0.473205548909112	0.0153050200724883
Smp_067540	XLOC_022357	reverse transcriptase	5373.44862417576	3620.6915769102	0.673811518476289	0.838705145989292	4029.37044461841	1615.94943737124	0.401042659041063	0.0939950427016139	4558.75778598249	1797.79629726563	0.394361003954539	0.000877668186936104
Smp_166510	XLOC_029330	PREDICTED: RNA-directed DNA polymerase from mobile element jockey-like	518.279533740362	9.75371728259473	0.0188194143268659	1.74511752833421e-06	167.589322446001	19.6751397192494	0.1174009145218	5.98180847123043e-06	334.720306318536	64.0373421169606	0.191315976079502	0.224679002704778
N.A.	XLOC_029391	endonuclease-reverse transcriptase	525.734229539572	0.506332444418957	0.000963095830496701	9.43135639782453e-20	178.133105347913	10.9290413194451	0.0613532296430779	7.85598181200877e-09	441.033555592018	78.6369118420531	0.178301425923239	0.372975570832992
N.A.	XLOC_016781	endonuclease-reverse transcriptase	169.739194085838	7.37122770281371	0.0434267862676787	0.000208433267157003	113.719607456002	30.5905998490849	0.2690002237382	0.0219448006041863	208.812265539343	43.1464333430452	0.206627868490397	0.000322457599400963
N.A.	XLOC_022148	endonuclease-reverse transcriptase	83.1230299650562	113.10582731752	1.3607038550576	0.736721363526319	140.852383998517	26.75272772107	0.189934504206558	0.000985342692249495	73.9100772351106	23.5205954534956	0.318232592000625	0.0282092039453091
N.A.	XLOC_015600	reverse transcriptase	36.7243530232556	1.95074345651895	0.0531185247915367	0.00221063966676486	52.8291827870066	17.937232309955	0.339532647746478	0.227069332022331	50.6879482298431	11.9698830455123	0.236148502031196	0.0190759437481964
N.A.	XLOC_008829	endonuclease-reverse transcriptase	52.3082160169461	1.01266488883791	0.0193595761038733	2.30774560435613e-05	0	2.01624098616874	Inf	1	34.1515298859185	6.90035461506678	0.20205111273542	0.0366006442606656
N.A.	XLOC_012740	tpa_exp: pol polyprotein	73.9252531383698	1.01266488883791	0.013698497412548	0.0137962750713712	7.32607774450521	2.3360636635033	0.318869625053519	0.933429681177683	76.0763489528702	13.112732103692	0.172362794537043	0.0146267143346872
N.A.	XLOC_015843	Putative endonuclease-reverse transcriptase	152.363488899672	4.80227232014048	0.0315185242528981	1.06908969435947e-06	4.04333932441159	5.60368744815974	1.38590580669982	1	175.769046590231	13.6822668898371	0.0778423001959749	3.05255478304101e-11
N.A.	XLOC_017957	endonuclease-reverse transcriptase	48.6339814027713	0.469039283840516	0.00964427074057706	1.29199583765761e-05	0.695567641630943	3.78205630631367	5.43736666278154	0.993969616593489	40.8579729643773	6.02253255991018	0.147401648269752	0.00642894545703307
N.A.	XLOC_015842	endonuclease-reverse transcriptase	69.6990129079824	1.95074345651895	0.0279881073652269	0.000158205767592613	0.695567641630943	2.5027655969754	3.59816277696155	1	60.4527644700875	8.34771145636847	0.138086513156879	0.021491534402767
N.A.	XLOC_003169	endonuclease-reverse transcriptase	88.1729264993306	1.40711785152155	0.0159586157269287	1.65477596861285e-07	4.17340584978566	2.53067350782597	0.606380879050126	1	89.4448085016822	11.7405573366984	0.131260355222043	1.46952067894649e-05
N.A.	XLOC_031715	endonuclease-reverse transcriptase	120.257760433445	94.4245918382767	0.785185018396671	0.794656586353576	10.5437829019118	24.4860610688775	2.32232219656549	0.743896396231762	101.313699208338	8.23304860196154	0.081262935479548	5.86582888074182e-08
N.A.	XLOC_025275	tpa_exp: pol polyprotein	139.68476820851	14.5932827633137	0.104472971179864	0.000129933674018678	47.9149742808294	23.2346782703898	0.484914760346348	0.528215647129275	146.862894000974	26.0318397927794	0.177252668006166	1.16162367922868e-05
N.A.	XLOC_025099	reverse transcriptase	88.142743089589	6.79030893723787	0.077037640300531	0.000121579579492373	29.4343775033949	40.1294643474207	1.36335359369473	0.980839433538225	112.260870732232	27.5976389743776	0.245834891484178	0.00107149014417389
N.A.	XLOC_014035	endonuclease-reverse transcriptase	90.9724268677634	50.3463982637082	0.553424812299349	0.419480448717808	13.4561199938096	15.5174449139	1.15318865475625	1	112.64324331596	23.8251032366176	0.211509386051581	0.0392197314695525
N.A.	XLOC_027467	endonuclease-reverse transcriptase	68.963005419699	60.3984608309304	0.87580958027212	0.984702734529216	3.47783820815472	11.2767719076302	3.24246593219571	0.784011029122562	78.1300732634291	18.1427797540386	0.232212501489242	0.0043518003637842
N.A.	XLOC_020118	endonuclease-reverse transcriptase	121.404145366861	18.025730392511	0.148477058489565	0.0111416826631654	6.26010877467849	9.56677240918646	1.52821184959007	1	165.891682942786	46.3099535145613	0.279157777491069	0.0335526734978512
N.A.	XLOC_003168	endonuclease-reverse transcriptase	603.294245004746	19.1129816025058	0.0316810275595376	8.08780276278622e-11	13.5861865191837	6.68836831317535	0.492291807103588	0.994377674059364	395.943435749807	65.9828311559888	0.166647114709796	1.66864687785163e-07
Smp_204800	XLOC_030748	tpa_exp: reverse transcriptase	537.440693654996	201.305257180456	0.374562736981137	0.524147421044654	101.114558396032	87.1554880419491	0.861947966984045	1	345.800757666746	56.3851667588128	0.163056805136188	1.82235984403258e-06
N.A.	XLOC_021787	tpa: gag-pol polyprotein	134.453771215786	0.506332444418957	0.00376584784376438	7.58318434238783e-06	11.5645168569779	7.24428993529276	0.626423915921887	1	103.94527317829	30.3814692884636	0.292283317552616	0.00553797105123823
N.A.	XLOC_026459	tpa_exp: pol polyprotein	233.773036610229	132.672076400188	0.567525144575987	0.461832891802761	4.60884044066847	15.6426577469119	3.39405495770278	0.690198858940916	182.505107407427	40.4058632949476	0.221395794720117	2.66653509887849e-05
N.A.	XLOC_014628	reverse transcriptase	77.8258633256065	52.5954870048547	0.67580987550124	0.687870495626027	20.7821977383148	21.6913807054181	1.04374816266073	1	106.022691679839	30.9510040746087	0.291928110711174	0.00643440141075366
N.A.	XLOC_029048	tpa: gag-pol polyprotein	117.277159606562	65.3126126328062	0.556908206610008	0.488207012574437	19.2411976817525	35.2204925439999	1.83047298440271	0.89896719247539	68.7476296069131	19.0206018091952	0.27667283829205	0.0186800666028737
N.A.	XLOC_026174	endonuclease-reverse transcriptase	5.54153533100375	1.01266488883791	0.182740852191677	0.559375860473698	149.094565939548	46.3026546073075	0.310558968501115	0.0498764456317873	9.31432285742083	4.04134222667267	0.433884705150937	0.909778822867302
N.A.	XLOC_025648	endonuclease-reverse transcriptase	23.3456110807942	0	0	0.0186814151663023	0	0.639645354669135	Inf	1	24.3037839772104	0.419170637528887	0.0172471347639504	0.00100971117287777
N.A.	XLOC_002444	endonuclease-reverse transcriptase	25.0892767450355	0	0	0.000566183892163229	0	1.98833307531816	Inf	1	22.235250797283	0.838341275057774	0.0377032524931184	0.00570307469702937
N.A.	XLOC_003213	Reverse transcriptase	220.038481214875	16.581319380411	0.0753564526025737	3.88640235427151e-06	3.34777168278065	3.49014153982967	1.04252675228162	1	230.644411335782	6.86087383496795	0.0297465427201685	9.59791561550133e-20
Smp_152200	XLOC_000180	endonuclease-reverse transcriptase	89.6147580661559	5.271311603981	0.0588219141325984	4.72483007574372e-05	0	0	NA	NA	54.2797444429159	2.43984175086522	0.0449493964259746	1.87652949492163e-06
N.A.	XLOC_027600	PREDICTED: RNA-directed DNA polymerase from mobile element jockey-like	202.765516549184	1.40711785152155	0.00693963093660569	3.03729534123271e-12	6.19507551199146	0.639645354669135	0.103250614690815	0.839065464213819	246.036977456416	4.34585000979463	0.0176634018785427	1.19950005933e-16
N.A.	XLOC_023105	endonuclease-reverse transcriptase	34.7937840733221	0	0	0.00151260225044554	0	0	NA	NA	26.8820460174355	2.43984175086522	0.0907610138485278	0.00897059275492989
Smp_136610	XLOC_031890	reverse transcriptase	65.6840565457862	0.506332444418957	0.00770860496513349	0.00198696712931504	5.56454113304755	0	0	0.811091179557778	81.1144020783722	3.04885731710914	0.0375871268108881	0.00227711863472211
N.A.	XLOC_007174	tpa: endonuclease-reverse transcriptase	75.2498371166144	0.506332444418957	0.0067286849223912	0.0494913483996281	0	0	NA	NA	92.9744074634073	2.32517889645829	0.0250088057552121	0.0136522672618853
N.A.	XLOC_014978	tpa: endonuclease-reverse transcriptase	19.4873745945486	5.88952353013528	0.302222523694024	0.333360341948269	12.3703527760565	6.31272981413963	0.510311219770408	0.936660844746228	22.2441361189041	1.90600825892941	0.0856858746386465	0.0210377131837135
N.A.	XLOC_026249	endonuclease-reverse transcriptase	32.5764727308435	4.98873812303269	0.153139296701983	0.105073416195021	1.95663639951876	0.959468032003703	0.490366034404596	1	44.9831922287373	2.51502382517332	0.0559103011717032	8.04618496733588e-05
N.A.	XLOC_003216	endonuclease-reverse transcriptase	38.5916537400846	13.6552041956326	0.353838275177339	0.243987251551247	0	0.959468032003703	Inf	1	32.5779166969201	1.25751191258666	0.0386001328533553	0.000398746546680896
N.A.	XLOC_001881	endonuclease-reverse transcriptase	22.1510496191442	0.975371728259473	0.0440327544305847	0.01375801231479	0	0.319822677334568	Inf	1	44.4734633684397	3.278183025923	0.0737109902767172	0.000174060439271999
N.A.	XLOC_027242	endonuclease-reverse transcriptase	25.7951008235774	0.506332444418957	0.0196290159081742	0.0643098121511203	0.63053437894391	0	0	1	29.4988111180186	1.90600825892941	0.0646130534313354	0.00225893794876463
N.A.	XLOC_005362	endonuclease-reverse transcriptase	21.4452255406023	0	0	0.10301592557395	0	1.7937232309955	Inf	1	22.750903205328	1.90600825892941	0.0837772567413078	0.0181050556259865
N.A.	XLOC_024050	Endonuclease-reverse transcriptase	201.109499700546	0	0	4.74027909276255e-06	0.695567641630943	0	0	1	248.695207391231	1.67668255011555	0.00674191741651821	3.30409503436848e-27
N.A.	XLOC_027847	endonuclease-reverse transcriptase	37.3036406355885	5.271311603981	0.141308234643244	0.253822041492286	2.65220404114971	0.417127599495899	0.157275832863552	1	52.166784654883	1.79134540452248	0.0343388118775843	0.0396301578734997
N.A.	XLOC_007816	endonuclease-reverse transcriptase	28.5493260773978	7.22205506049995	0.252967619653116	0.158351615006013	0	3.4622336289791	Inf	0.902622514120674	35.6481369542006	1.37217476699359	0.0384921873689082	0.00581848142980506
N.A.	XLOC_029961	tpa: endonuclease-reverse transcriptase	17.7106241069444	0	0	0.0142450363166476	0	0	NA	NA	12.9268514876096	0	0	0.0242205626098687
N.A.	XLOC_001042	endonuclease-reverse transcriptase	36.9356368914468	0	0	0.136458729872004	0.695567641630943	1.89102815315683	2.71868333139077	1	51.6689028900802	0	0	1.86313648058704e-05
N.A.	XLOC_001486	endonuclease-reverse transcriptase	9.49032204647417	0	0	0.253879580297343	0	0	NA	NA	16.5453036655457	0	0	0.0054359094411173
N.A.	XLOC_009865	endonuclease-reverse transcriptase	4.53097574142462	90.2620528011897	19.9211070533804	2.6538828812918e-05	0	42.9098179896392	Inf	0.000134680568466133	6.20263776590858	16.1615894208011	2.60559942894452	0.662171316248688
N.A.	XLOC_001892	endonuclease-reverse transcriptase	8.00611677865773	88.7430554679328	11.0844068256036	0.000299294681949538	0	27.934713508247	Inf	0.00440293181618152	6.71236662620619	17.4191013333878	2.59507596998363	0.627792769321987
N.A.	XLOC_005217	endonuclease-reverse transcriptase	6.35300134364121	29.7517124885239	4.68309557628266	0.118293699467157	0	25.7238626777556	Inf	0.0073354942967803	7.239866129746	21.9942770519963	3.0379397433372	0.406753506274816
N.A.	XLOC_024702	endonuclease-reverse transcriptase	37.9009213664135	4.25864671514309	0.112362617097666	0.129105958902211	0	21.1490402729103	Inf	0.0216737536117646	55.8326252147984	50.3550752271235	0.901893382827662	1
N.A.	XLOC_000840	endonuclease-reverse transcriptase	27.264214386523	20.9891387378679	0.769842051573767	0.944618172118819	0	18.3679410990605	Inf	0.0490475195926127	40.2771615311108	34.2254076146421	0.849747259081446	1
N.A.	XLOC_027956	tpa: endonuclease-reverse transcriptase	9.26104505979091	14.9877357259973	1.61836333040536	0.846388060835167	0	18.5489697537736	Inf	0.0388313855106816	9.83589881321324	13.1879141780001	1.3407940065715	1
N.A.	XLOC_001737	endonuclease-reverse transcriptase	4.11769688267049	1.44441101209999	0.350781287029372	0.787291952814614	0	22.1922320374657	Inf	0.0160474714181209	7.239866129746	13.7217476699359	1.89530406005136	0.933246110352675
N.A.	XLOC_003986	reverse transcriptase	0.826557717508259	1.48170417267843	1.79262033526851	1	1.95663639951876	30.3959900047622	15.5348178191094	0.0295933726899374	1.54991899800872	6.32704034303213	4.08217484343433	0.828515603050832
N.A.	XLOC_001960	tpa: endonuclease-reverse transcriptase	8.43448734228265	109.636086527745	12.9985477573879	8.62319961210097e-05	0.695567641630943	34.4699610775599	49.5565909258456	0.00341284991777093	11.8896231237722	59.8418562557821	5.0331163261293	0.00545466173247298
N.A.	XLOC_024309	tpa_exp: pol polyprotein	0	63.8151366564486	Inf	1.40474196725868e-07	2.08670292489283	39.461911081901	18.9111303823604	0.0058383515679182	0	90.2401294090072	Inf	0.299910489860085
N.A.	XLOC_017902	tpa: endonuclease-reverse transcriptase	11.0981623668783	49.2376256968142	4.4365566180362	0.0622070455719325	2.08670292489283	30.0067703161169	14.3799914967091	0.0305434226880775	11.3739707157272	26.1502821330759	2.29913394246013	0.585473085858401
N.A.	XLOC_004596	endonuclease-reverse transcriptase	18.582456939065	54.5677518182728	2.93651975070948	0.307833456278557	2.78227056652377	53.4918742525305	19.2259785572775	0.000864548042800902	10.8583183076821	32.5525045504161	2.99793242636712	0.234330236753348
N.A.	XLOC_021255	endonuclease-reverse transcriptase	19.7166515812318	17.2956389846214	0.87720974899638	1	3.21770515740658	35.7492517868981	11.1101701486259	0.0301455345739288	34.6434881029739	24.6634445116754	0.711921514322289	0.993304491317839
N.A.	XLOC_005150	tpa: reverse transcriptase	26.1903865638394	20.1629396519222	0.769860330345822	0.884051048829336	3.97830606172456	50.8631502909118	12.7851275145138	0.0118376766996304	24.8016657420132	21.0017921424327	0.84678958102626	1
N.A.	XLOC_002711	retrovirus-related pol polyprotein	29.6202524864601	17.4075184663568	0.587689739454922	0.616592001654928	4.4787739152944	56.1749229725876	12.5424779269965	0.00327247218062357	44.4586544990712	54.3174558935985	1.2217521314041	1
N.A.	XLOC_016451	endonuclease-reverse transcriptase	6.965373779337	8.30930627049474	1.19294477708354	0.9859009897749	5.17434155692534	40.8241799921597	7.88973428658194	0.0419070712506188	4.14298990760226	14.7894146538075	3.56974431114819	0.489651906427977
N.A.	XLOC_003634	endonuclease-reverse transcriptase	19.1193708504068	34.0634241679247	1.78161846613273	0.627748277508048	4.60884044066847	44.2728324315292	9.60606751339559	0.0176302260212362	32.5956873401624	61.9057876351069	1.89920178669865	0.465655882754476
N.A.	XLOC_006722	endonuclease-reverse transcriptase	18.1088112608277	40.3101075001651	2.22599412626065	0.432954580938449	7.89157886076208	67.6606314457814	8.57377625435622	0.0039313476799065	31.5466118808301	46.6182407835728	1.47775745172499	0.894880057153228
N.A.	XLOC_015993	endonuclease-reverse transcriptase	27.5085830780771	27.4968741941574	0.999574355251727	1	2.58717077846267	31.0771244598915	12.0120112358249	0.0435585181817448	18.110031532923	31.7536440554572	1.75337320632109	0.8046469798032
N.A.	XLOC_010325	reverse transcriptase	6.59737003519527	30.9508431802541	4.69139111723903	0.130308149168536	5.30440808229941	47.0539316053789	8.87072240207082	0.016199369730422	11.8925848976459	17.6484270422016	1.48398579401314	1
N.A.	XLOC_029670	endonuclease-reverse transcriptase	25.7620160002145	4.33323303629997	0.168202404511506	0.2904447607444	6.13004224930442	42.6043220335456	6.95008619857063	0.0404518360925036	29.9937311089477	31.1408490033237	1.03824525499043	1
N.A.	XLOC_016020	endonuclease-reverse transcriptase	263.375295978197	16.2456809352051	0.0616826300085106	5.29558453677773e-07	0.695567641630943	25.4734370117318	36.6225158950789	0.0224169411884647	261.515435019387	74.6988940121187	0.285638566635965	0.0779040301137005
N.A.	XLOC_031133	endonuclease-reverse transcriptase	15.7829565706322	20.5200994540274	1.30014293343553	0.877834228264159	0.695567641630943	24.2914512245548	34.9232048339642	0.0292755772527683	23.8029404385339	13.3777591067151	0.562021282255457	0.913175478202714
N.A.	XLOC_027032	reverse transcriptase	12.9956464934489	17.0130655036731	1.30913575652042	1	0.695567641630943	27.2950681535778	39.2414288991036	0.0153019903260931	14.4856558072394	12.6935614661631	0.876284901082582	1
N.A.	XLOC_004092	gag-pol polyprotein	5.55662703587455	18.2337175523025	3.28143628042379	0.365998555019809	0.695567641630943	22.8039694812843	32.784689966046	0.0371118532803902	9.29359044030492	9.79506829767016	1.05395953916695	1
N.A.	XLOC_011458	endonuclease-reverse transcriptase	9.01667636823685	6.24668333224047	0.692792230432683	0.976488878025461	1.39113528326189	26.1968060989526	18.8312426650033	0.0361663672783699	6.7301372694484	14.4849068706856	2.15224538382599	0.851117720751319
N.A.	XLOC_031200	endonuclease-reverse transcriptase	52.5345915900081	338.63618281169	6.44596584007893	0.000789320477747641	37.1110583281694	176.883138692184	4.76631889955884	0.00135690506042848	78.0589906904603	176.642193542412	2.26293207201306	0.0505946757806196
N.A.	XLOC_005481	endonuclease-reverse transcriptase	49.2736358345875	165.222252788075	3.35315732215763	0.0777854931408194	30.6954462612827	127.883108643579	4.16619154369104	0.00815904715498053	66.6909435224805	81.4526639644588	1.22134520314595	1
N.A.	XLOC_021752	endonuclease-reverse transcriptase	54.9237145133081	383.491783205186	6.98226233610375	0.000283476829947597	21.3476988545717	98.6404509835116	4.62065966245291	0.0117674584390358	52.7327872187809	83.5993363898708	1.5853388527147	0.700015960148209
N.A.	XLOC_010795	reverse transcriptase	77.5333181058188	174.522702590509	2.25093813671585	0.228280258005605	38.9574264502406	153.201933848185	3.93254759895053	0.00875383110057041	112.263832506105	214.517915068628	1.91083726860083	0.213989107915661
N.A.	XLOC_024697	endonuclease-reverse transcriptase	79.3826257041557	67.2045415718475	0.846590056397308	0.91596495707509	86.4369661401871	297.785218724472	3.44511419155448	0.00380134048075702	112.189788159263	123.341585394917	1.09940117918597	1
N.A.	XLOC_001804	endonuclease-reverse transcriptase	90.9753282813847	331.563300393504	3.64454085142717	0.0169427098545828	63.1524291340231	211.812462001332	3.35398756478266	0.00892766840992988	115.923749518273	272.216878384888	2.34824080066507	0.407711838982315
N.A.	XLOC_002350	gag-pol polyprotein	61.2616241520785	284.9634668473	4.65158197797522	0.00543609909848549	38.2618588086096	132.414950884701	3.46075582859308	0.0260152053849851	52.2497143233466	110.920609903557	2.12289409310692	0.135163865918347
N.A.	XLOC_000408	reverse transcriptase	241.679898918798	502.141473357176	2.0777130229018	0.232094157993023	110.911900122644	442.286270931471	3.98772602797715	0.000230652345157708	246.67998614103	400.829175596634	1.62489540342148	0.376047407727368
N.A.	XLOC_012179	endonuclease-reverse transcriptase	74.7007329140231	627.165498126822	8.39570742697611	3.93083800643982e-05	25.4362731937439	111.419776887285	4.38034990576719	0.0109537114905819	91.4926092644937	91.6669028996578	1.00190500234462	1
N.A.	XLOC_019600	endonuclease-reverse transcriptase	112.848924385612	182.229568738528	1.61480997475739	0.552095728967857	37.5210561522181	132.23466776162	3.52427893354495	0.0201868312436831	125.715221723381	211.856306580728	1.68520807326648	0.299731372383922
N.A.	XLOC_010801	reverse transcriptase	191.576803953081	183.450220787158	0.957580547340621	1	48.0450408062034	183.291682365223	3.81499691309569	0.00680597255235405	238.865232125765	228.104416533506	0.954950264228518	1
N.A.	XLOC_000636	endonuclease-reverse transcriptase	97.4490632639923	167.614764618316	1.72002437995984	0.490728019177404	29.7397455689036	111.627967921217	3.75349438220941	0.0238530852098112	135.927569572575	147.969328612383	1.08858952659621	1
N.A.	XLOC_015562	endonuclease-reverse transcriptase	86.4112677165972	195.623720810112	2.26386819658402	0.227316679180739	45.4776682756672	170.25058620071	3.74360851503468	0.00716626261306685	108.037912930039	133.444940961599	1.23516770495198	0.977631259904701
N.A.	XLOC_032605	endonuclease-reverse transcriptase	123.763084880419	174.112477824146	1.40682076559723	0.730124075715684	48.7802049436872	179.345160720331	3.67659711408286	0.00893795832992433	119.930497827685	218.258528998068	1.8198751189348	0.178621279681029
Smp_124370	XLOC_008452	tpa: endonuclease-reverse transcriptase	598.021458947796	158.687246421667	0.265353766235869	0.0104024800804802	23.6097033195992	112.502966689038	4.76511564614389	0.00770714760389043	508.388240216229	513.661666809696	1.01037283354789	1
N.A.	XLOC_021363	endonuclease-reverse transcriptase	90.5742397138801	368.547090192987	4.06900561746045	0.0131587499780249	50.5219433072185	148.962006373547	2.94846153220443	0.045290272160857	126.21014171431	183.040636473862	1.45028469176585	0.647432318907274
N.A.	XLOC_005516	endonuclease-reverse transcriptase	178.433141824545	652.839280149875	3.65873331307374	0.00963470044029083	115.000474461816	334.477375227239	2.90848691531526	0.0169505510752893	198.564376403665	285.502651552533	1.43783420129767	0.608594328457212
Smp_137200	XLOC_031423	reverse transcriptase	594.652544481423	562.838279472734	0.946499404897977	0.961583365057855	369.532869420482	1134.41466511322	3.069861327606	0.00765902006834406	676.573247399323	1065.28935516347	1.57453662150896	0.311499281158135
Smp_167070	XLOC_029846	rna-directed dna polymerase from mobile element jockey-like	418.63753971639	450.243057296872	1.07549613826293	0.947049975245354	132.154969218676	380.780029834547	2.88131450588492	0.0148447939747575	444.533233060985	445.338538813691	1.00181157603709	1
N.A.	XLOC_034691	endonuclease-reverse transcriptase	198.400549561338	381.077750018046	1.92074946798588	0.360643652397729	136.198308543088	375.929110447721	2.76015990557469	0.0166886176838171	238.411776969068	309.33531376093	1.29748336132348	0.867899213599351
N.A.	XLOC_007059	endonuclease-reverse transcriptase	300.838557903357	281.440661093266	0.935520576400575	1	118.718647472793	331.072448483224	2.78871479359716	0.0177850575986368	346.689593582877	313.479980384341	0.904209373995538	1
N.A.	XLOC_007999	endonuclease-reverse transcriptase	152.801148340925	277.272372502959	1.81459613041859	0.411885476528855	106.042926631228	281.155185034706	2.65133370010095	0.0295933726899374	161.876049311753	274.141784073265	1.69352900097841	0.255449960213768
N.A.	XLOC_028950	endonuclease-reverse transcriptase	309.445441463225	1344.36206368216	4.3444235511284	0.00428331066340019	209.224389704226	594.457103141447	2.84124190292448	0.00738226900009736	260.724033887067	458.020761822185	1.75672627871574	0.149706260143855
N.A.	XLOC_027132	endonuclease-reverse transcriptase	334.076164234894	902.129967371157	2.700372142494	0.0757464824841679	98.697050638796	256.3470646936	2.59731231110198	0.0465464302678704	346.710325999993	309.921652411836	0.893892189446479	1
Smp_078560	XLOC_019354	gag-pol polyprotein	3589.91130700162	3582.75557146604	0.998006709658362	1	1133.33931381356	2712.65591659635	2.3935072961235	0.0182575316553866	4148.65061651562	3748.17116958252	0.903467540665199	1
N.A.	XLOC_027149	endonuclease-reverse transcriptase	2763.46680993519	1357.39626011038	0.491193255960333	0.191596156624327	415.400737272272	1002.18894373117	2.41258344968776	0.0206825834412652	2964.34664270003	2811.1119205652	0.948307421295622	1
Smp_129590	XLOC_000244	reverse transcriptase	1028.7294176068	1613.71958287731	1.56865309308585	0.537260551041278	400.776901241299	939.334014913602	2.34378281783273	0.0270567173089717	1398.74041995341	1129.80552440523	0.807730661306595	0.958973493927931
N.A.	XLOC_002019	endonuclease-reverse transcriptase	14.6487619284654	94.2596473922837	6.43464941628404	0.00739457453726022	11.7398183971126	60.5694622543512	5.15931850097854	0.036941125639979	13.4306568001598	25.9961384985701	1.93558207058503	0.733463355695063
N.A.	XLOC_008794	endonuclease-reverse transcriptase	125.093471685907	138.598893090901	1.10796263964042	1	18.3703284999868	135.905837956162	7.39811691207697	0.000161500510842159	109.590793701922	124.499552396655	1.1360402474617	1
N.A.	XLOC_004342	reverse transcriptase	34.5795987915097	72.5561890502054	2.09823686757234	0.392059628061992	14.5871222263234	73.9039642486103	5.06638410935133	0.0205104002781631	34.1337592426763	59.0072944666139	1.7287077595848	0.611708347557554
N.A.	XLOC_013311	reverse transcriptase	23.2521594379481	86.0622206035243	3.70125711692259	0.0621949708979147	18.3052952372998	91.6744946250932	5.0080860994961	0.0109537114905819	21.2394872676774	40.4810453692557	1.90593326755399	0.666961108689177
N.A.	XLOC_032948	endonuclease-reverse transcriptase	32.6519312551975	138.300547806274	4.23560085084582	0.0158918407245512	10.173381573716	75.155347047098	7.38744993515918	0.00371945645047318	47.0783813735281	59.8494152275613	1.27127172773222	1
N.A.	XLOC_004948	endonuclease-reverse transcriptase	34.5494153817681	135.054565979969	3.90902608590123	0.0299777415138101	10.933982478034	80.4384662862918	7.35674000282057	0.00891957456922	34.1307974688026	70.7516312892019	2.07295570382945	0.31421828283816
N.A.	XLOC_031291	reverse transcriptase	13.1645566606489	84.4844087527897	6.41756581179279	0.00634637067704935	11.3694170689168	66.1030071595688	5.81410698181614	0.0180092704825765	28.9772351622262	29.1596586700862	1.00629540764806	1
N.A.	XLOC_008347	endonuclease-reverse transcriptase	50.0880032608462	8.74105239375682	0.17451389204388	0.0254508327203933	23.4344017794645	108.763145014815	4.64117437425367	0.00815904715498053	55.3495523193641	68.9132461328015	1.2450551674777	1
N.A.	XLOC_010585	tpa: reverse transcriptase	40.0607673030302	70.8292045571571	1.76804413209029	0.506612832353846	8.08667864882318	47.5683641270362	5.88231166252149	0.0457133041150739	27.4184308425964	43.300576977551	1.57925073196678	0.809405536304751
N.A.	XLOC_017002	reverse transcriptase	27.7982268842435	63.1381102128167	2.27129990972929	0.357913011790211	10.108348311029	54.3125482619127	5.37303885765922	0.0378259818000202	51.7340619153016	53.5580761787384	1.03525751112339	1
N.A.	XLOC_002586	reverse transcriptase	33.7681327788722	63.5325631755003	1.88143548213157	0.527238737105702	15.4777896560154	84.4996017011112	5.45941013407367	0.00848922081893268	35.16802583264	75.2402864758336	2.13945152434465	0.23466706555948
N.A.	XLOC_018497	endonuclease-reverse transcriptase	55.5511786538747	98.534065911106	1.77375293015918	0.518937598232984	24.8905703254135	121.597541208658	4.88528545625595	0.00389127575634378	67.2806402773681	94.7590204827554	1.40841436841425	0.815609976428715
N.A.	XLOC_025655	endonuclease-reverse transcriptase	86.073447382197	279.772491117696	3.25039253830982	0.0519234923434648	8.65217976508006	50.808080000842	5.87228668154838	0.040015039335923	106.490955705904	90.44887176717	0.849357310840201	1
N.A.	XLOC_012850	reverse transcriptase	77.1954977714187	48.9019872516082	0.633482374793546	0.570435173655437	33.6077833531806	144.637609634726	4.30369382338444	0.00463581969206726	99.8644805220356	135.548353121023	1.35732296821104	0.844604057962379
N.A.	XLOC_009408	endonuclease-reverse transcriptase	35.2523380466887	58.5223036955684	1.66009708683891	0.711907580983795	23.6097033195992	91.5077926916211	3.87585525548122	0.0350949727570244	41.8952013282147	59.6877126212764	1.42469091277714	0.921234997421113
N.A.	XLOC_017626	endonuclease-reverse transcriptase	29.804254358531	32.8270003156161	1.10141994900201	1	10.6738494272859	54.8963777948806	5.14307215675607	0.0448728064566715	24.8253599330028	31.3701747121375	1.26363423518521	1
N.A.	XLOC_012064	endonuclease-reverse transcriptase	10.699975212995	32.4698405135109	3.03457156368706	0.267217521765622	23.980104647795	110.028109002913	4.58830812537885	0.0106437353277068	11.385817811222	39.1878321624598	3.44181092761171	0.116842694128118
N.A.	XLOC_009675	tpa: reverse transcriptase	31.4422780886767	86.1956214421588	2.74139237618411	0.148840497223673	7.65124405794038	66.6453475920766	8.71039364152981	0.00324711802586303	32.5897637924149	45.96974443723	1.41055776685099	0.94702005174977
N.A.	XLOC_034264	tpa: reverse transcriptase	32.4830210879974	64.6198143854951	1.98934126879511	0.428728782208957	6.06500898661739	48.3332223147172	7.96919220092926	0.0184355730002591	44.4823486900608	47.8757526961595	1.0762865295118	1
N.A.	XLOC_005991	tpa_exp: pol polyprotein	42.1544435929212	77.5234058163389	1.83903283281284	0.824154840268272	8.15171191151022	65.7137874709234	8.06134811733663	0.00501916023172076	37.1269733792404	23.9002853109257	0.643744510676691	1
N.A.	XLOC_024441	reverse transcriptase sr3-left	46.9779645541335	38.6204161676953	0.822096413376793	0.87408726755549	10.4137163765377	73.0138932279174	7.0113195508588	0.00655430832400377	58.4138490288971	51.7234705082275	0.885465884684985	1
N.A.	XLOC_033657	tpa: reverse transcriptase	24.6910895911522	51.433649473703	2.08308545006996	0.442259325654027	6.6955433655613	43.925101843344	6.5603490926926	0.0461365858885182	36.6912888657854	29.0055150355804	0.790528649502636	1
N.A.	XLOC_020830	gag-pol polyprotein	39.3880280478512	34.1007173285031	0.865763507811949	0.995115958880324	5.49950787036051	40.8935770034704	7.43586116566276	0.0412975249610558	28.9831587099736	45.2460660165792	1.56111576620561	0.828474021158799
N.A.	XLOC_024210	endonuclease-reverse transcriptase	67.8862761833941	68.1110765321701	1.0033114255401	1	7.06594469375707	70.315772254988	9.95136182103344	0.0143405823985674	57.4210472731652	69.1858321076037	1.20488628113087	1
N.A.	XLOC_017846	endonuclease-reverse transcriptase	75.7141939172235	15.9631074542568	0.21083375029666	0.0256302642848851	13.5663882712573	109.067895439278	8.03956758854948	0.0385535848021548	81.7426018936178	105.399989027262	1.28941318951938	0.977631259904701
N.A.	XLOC_024280	reverse transcriptase	85.3554330124057	16.0004006148352	0.187456147196977	0.00853052011082811	14.4118206861887	123.655271295287	8.58012835351122	8.49405117009607e-05	77.1165390905813	122.783389066441	1.59217971286574	0.566956050333169
N.A.	XLOC_010083	TPA: gap-Pol polyprotein	0	50.159932460816	Inf	1.8664870899238e-06	0	17.0471612892621	Inf	0.0568250294582457	0	23.326971038891	Inf	0.000425946283810615
N.A.	XLOC_008883	endonuclease-reverse transcriptase	0.413278858754129	2.38248957978102	5.7648474615016	0.861118535652886	0	6.47943174761172	Inf	0.735926761842208	2.06557140605373	28.4002789552261	13.7493571376866	0.00532922684234259
Smp_151370	XLOC_020969	reverse transcriptase	2.47967315252478	0.469039283840516	0.189153672677766	0.786559274960617	40.628493032177	37.1816632400989	0.915162253511388	1	1.54991899800872	21.4604435600605	13.8461710499917	0.0198398131845595
N.A.	XLOC_005205	tpa_exp: pol polyprotein	1.43893015320405	14.8170417267843	10.2972626529448	0.116937083717604	0	2.30815575265273	Inf	1	0	15.1728839971272	Inf	0.013737747050511
N.A.	XLOC_012494	tpa_exp: gag protein	1.43893015320405	11.6671675785352	8.10822370533834	0.212271209796901	3.91327279903753	7.78663036780057	1.98980003891262	1	0	13.492421961122	Inf	0.0209976722264091
N.A.	XLOC_034430	Reverse transcriptase	1.63802373014572	392.777938059921	239.787697108014	5.57697883707066e-15	2.78227056652377	97.1258068610219	34.9088287924394	2.10799440712324e-06	1.55288077188242	187.67965580911	120.859024857139	4.3146728508469e-07
N.A.	XLOC_001236	Putative reverse transcriptase	1.43893015320405	22.5081360711248	15.6422714618956	0.0228398226666844	1.89160313683173	9.23262301061093	4.88084568630753	0.781926965047228	2.59307090959354	150.029480505819	57.8578395024822	2.3471386792453e-17
N.A.	XLOC_032592	tpa: endonuclease-reverse transcriptase	0	0	NA	NA	0	0	NA	NA	0	34.6088769579617	Inf	9.26189855927426e-06
N.A.	XLOC_018862	endonuclease-reverse transcriptase	2.86276860153731	13.6552041956326	4.76992942716354	0.239512656613546	8.45707997701896	27.3644651648886	3.23568716853194	0.470339253215605	1.03722836383742	25.3514216381169	24.4415044188772	0.00570675055842061
N.A.	XLOC_032890	gag-pol polyprotein	2.87786030640811	6.39585597455424	2.22243448033688	0.819243969622715	20.346763147432	31.9528687593435	1.57041532983964	0.936378915773578	2.06853317992743	32.5525045504161	15.7369989837718	0.00130873330116231
N.A.	XLOC_000288	endonuclease-reverse transcriptase	2.05130258889985	4.95144496245425	2.41380525196422	0.823078075904596	25.9113042804796	37.6538611296646	1.45318277775895	0.995375504733522	2.58714736184614	22.3739669094263	8.64812234485968	0.0396301578734997
N.A.	XLOC_017742	tpa: endonuclease-reverse transcriptase	28.9475132312811	20.9891387378679	0.725075711000512	0.852609317542453	190.709834949846	326.702089454154	1.7130846426461	0.935656641662985	13.4365803479072	220.950373373084	16.4439438943629	2.42187227990261e-07
N.A.	XLOC_024794	endonuclease-reverse transcriptase	2.26548787071231	31.121537179467	13.7372340773918	0.0744975087094211	2.65220404114971	5.35326178213593	2.0184200382318	1	1.54991899800872	18.3721054628525	11.8535907272937	0.0470784793257651
N.A.	XLOC_013932	endonuclease-reverse transcriptase	12.3229072382699	13.1115785906352	1.06400042921009	1	25.3062066683698	41.0881868477931	1.62364068966326	0.919375282005274	3.10576154376484	27.7517826088833	8.93558060328168	0.0180785955616478
N.A.	XLOC_031214	endonuclease-reverse transcriptase	6.965373779337	11.5925812573784	1.66431574595008	0.77479567400187	32.6520826608015	79.7995664632541	2.44393496403379	0.252180117000734	5.17133294981857	34.6126564438513	6.69317887278281	0.0159351230544852
N.A.	XLOC_002312	TPA: hypothetical protein	7.77683979197446	8.74105239375682	1.12398514403979	0.989157765683177	0	8.55148855548161	Inf	0.360789467008604	3.61845217793615	25.1183164434135	6.94172955955444	0.0433381048689332
N.A.	XLOC_002182	endonuclease-reverse transcriptase	8.61848921435352	21.6446438246006	2.51141972638927	0.430570332858615	54.3305863477161	72.1094954859835	1.32723573098369	1	7.7525567639173	71.4753097098527	9.21957902230655	3.14172057721624e-05
N.A.	XLOC_007611	reverse transcriptase	16.992609737153	10.036290763543	0.590626802991862	0.874987915822118	3.34777168278065	20.8986146068865	6.24254476922039	0.283479923689647	8.78682335388102	67.2084212602558	7.64877345924688	0.00185793865759658
N.A.	XLOC_007280	tpa_exp: pol polyprotein	4.92916289530795	6.60384313434567	1.33974942086654	0.984702734529216	11.5447186090515	58.7749934917243	5.09107198556079	0.0611669091656061	6.21448486140339	36.0205325050541	5.79622177998512	0.019509104272306
N.A.	XLOC_020542	endonuclease-reverse transcriptase	7.17955906114947	1.01266488883791	0.141048340185363	0.408169055780395	6.6955433655613	16.3660268341328	2.44431645657197	0.796299983600516	5.67810003624247	32.8570123335381	5.78662089850771	0.0290595664232514
N.A.	XLOC_033169	tpa_exp: pol polyprotein	271.779599910738	2138.92284016107	7.8700639814893	1.74255347630939e-05	202.984079177474	369.324465867098	1.81947504141046	0.273002969591367	219.792016575847	450.522730098543	2.0497683997684	0.0409893312503412
N.A.	XLOC_029534	endonuclease-reverse transcriptase	0	0	NA	NA	0	0	NA	NA	0	17.4942834076959	Inf	0.0155649437591209
N.A.	XLOC_026829	endonuclease-reverse transcriptase	202.587317504355	1210.20401041206	5.97374023863087	0.000242195683406712	280.9328900549	309.924899273576	1.10319905658967	1	219.812748992963	479.943636285763	2.18342038159546	0.0186399905771486
Smp_090980	XLOC_005385	endonuclease-reverse transcriptase	528.150049822228	632.829785837506	1.19820075005297	0.827672582387109	278.96773244527	333.933543731469	1.19703286399613	1	437.420723207809	930.22023681073	2.12660303331995	0.0175205992438965
Smp_138470	XLOC_013446	endonuclease-reverse transcriptase	1031.72567300512	509.511224204009	0.493843700447959	0.664018494050861	3872.18958062053	3722.67100387179	0.961386555684915	1	724.745130840288	1657.08602213161	2.28643967598698	0.00514498338692801
N.A.	XLOC_030340	endonuclease-reverse transcriptase	19.0590040309236	13386.9314475476	702.394071895207	9.25120465520006e-29	22.6087676124595	60.6531859869029	2.68272853375154	0.251937575502589	17.0609560735907	89.4715048011647	5.24422572892388	0.00819047866448325
Smp_141960	XLOC_019384	endonuclease-reverse transcriptase	129.566982021469	228.967075820606	1.76717148341594	0.400449419188957	133.481071239251	212.171537184232	1.58952528035932	0.593931298335541	111.736333002566	298.239473284685	2.66913603901639	0.00376952671619141
N.A.	XLOC_021835	tpa_exp: reverse transcriptase	92.2784330907515	274.570016281652	2.97545165305987	0.0434579576484544	30.5003464732216	85.6121904769774	2.80692517877272	0.143425888221221	84.7802426382875	224.031152498513	2.64249246672171	0.00896662474480617
Smp_168940	XLOC_005279	reverse transcriptase	222.014325279421	1086.84815561798	4.89539652114838	0.00115540288868523	1023.52157525528	1137.83466411011	1.11168605686335	1	214.620683626029	689.098853598492	3.21077559700271	4.15246938875974e-05
N.A.	XLOC_033329	endonuclease-reverse transcriptase	0	0	NA	NA	3.78320627366346	0	0	0.841845328603062	0	1033.8175419758	Inf	2.82117192421712e-61
Smp_139730	XLOC_024324	rna-directed dna polymerase from mobile element jockey-like	168.282270814141	355.168709925083	2.11055334710421	0.196541004066603	75.2230523634786	111.459774924482	1.48172363952884	0.948565164590323	189.152315008412	514.041356667126	2.71760542102943	0.00129026129030227
N.A.	XLOC_007018	endonuclease-reverse transcriptase	351.478566780416	151.912709288108	0.432210449358679	0.178119906400061	2833.4613720708	2027.19096494346	0.715446832953261	0.615037794058782	297.409399205105	875.628509021126	2.94418572970943	0.000378909818948109
N.A.	XLOC_020731	reverse transcriptase	119.177545146754	40.0275340192168	0.335864729970124	0.43833090363121	312.516121054672	250.465789200197	0.80144918078124	0.917386722648671	92.0704589238865	217.589449301074	2.36329276343624	0.028352218713828
Smp_170930	XLOC_007525	endonuclease-reverse transcriptase	165.66677231778	1436.7010343693	8.67223411350978	5.93597594266406e-06	143.199219974158	168.025408648978	1.17336818370449	1	145.274471942607	386.880195782571	2.6630982760372	0.00283578540265906
N.A.	XLOC_030778	tpa: endonuclease-reverse transcriptase	342.033519848554	188.252493107298	0.55039194167476	0.413297785195586	179.84940694461	316.318370693742	1.75879573954426	0.341857027073716	238.319961978983	514.35888882912	2.15827027059731	0.019197575265094
N.A.	XLOC_026348	reverse transcriptase	219.4290101928	209.027895132155	0.952599179791647	1	143.894787615789	102.74232996716	0.714010087992142	0.809050341734099	168.671345606423	419.590623453382	2.48762243488858	0.00603366169459647
Smp_169760	XLOC_032863	uncharacterized transposon-derived protein partial	137.711825557585	152.403269928848	1.10668251845314	0.961410443666884	41.8697635421384	58.9839300572879	1.40874762757916	0.933929694121389	124.129761438888	288.94631667063	2.32777629894089	0.0200956001963371
Smp_054620	XLOC_032407	tpa: endonuclease-reverse transcriptase	178.786053863816	117.492125318078	0.657166052826321	0.655499934335361	81.8083274515922	97.8763383274619	1.19641045571281	1	169.041871094656	372.99674550635	2.2065346478417	0.0248404068052643
N.A.	XLOC_019351	reverse transcriptase	10.8839770850658	139.030639214163	12.7738820219431	2.70643984188524e-05	20.7171644756278	47.8323709826696	2.30882807533535	0.470647545832568	12.932775035357	79.9733853148374	6.18377611117473	0.000221233091222593
N.A.	XLOC_011475	tpa: endonuclease-reverse transcriptase	23.2370677330773	35.9395813032867	1.54664873021512	0.757013098072955	12.3053195133695	29.4086140619079	2.38991064230036	0.650999407754992	22.7745973963176	93.659431690564	4.11245169610364	0.00230767694368935
N.A.	XLOC_024359	tpa: endonuclease-reverse transcriptase	39.2823861137556	0.469039283840516	0.011940193309089	0.104172512430211	31.1761158669261	34.6502442006416	1.1114355729413	1	28.9979675793421	95.9094285127142	3.30745347067148	0.0116270431076151
N.A.	XLOC_002143	endonuclease-reverse transcriptase	19.5024662994193	57.5311601636297	2.94994280622562	0.147886157867186	6.43541031481316	25.3203162678693	3.93453020541463	0.409327017170042	27.3799277822383	98.0409829945679	3.5807611975576	0.00539666008550397
N.A.	XLOC_020733	endonuclease-reverse transcriptase	20.7121194659401	43.0655286857306	2.07924296480374	0.39040621187418	27.217608053128	54.0063067741877	1.98424147591401	0.581412042259159	17.0757649429592	62.0561517837231	3.63416526234805	0.0231738402364537
N.A.	XLOC_017297	tpa: reverse transcriptase	42.4498902263302	28.9628065631567	0.682282248758138	0.803968604358968	14.3269891755752	40.2954207492615	2.81255330449732	0.66096401950249	19.1383745751393	71.700855932777	3.74644438331332	0.0123011401767081
N.A.	XLOC_007132	endonuclease-reverse transcriptase	28.1662306283853	17.7058637509843	0.628620278822141	0.683564316307361	20.9574992784495	48.7918390146733	2.32813268254985	0.477755502212696	24.8431305762451	79.2816287025063	3.19128977965101	0.0265383078241416
N.A.	XLOC_020283	gag-pol polyprotein	35.3306979846639	205.713076537913	5.82250247722836	0.00163850405432719	46.7641738003892	156.288528978129	3.3420568840848	0.0821789124199397	54.3508270158848	235.613786714816	4.33505430645894	1.31079008057831e-05
N.A.	XLOC_018380	gag-pol polyprotein	68.3959080986156	60.1001155463029	0.878709227160907	0.971714098264524	30.3052466851605	37.8205630631367	1.24798730253056	1	68.2704802592262	241.854306525872	3.54258979294623	0.000157870443865225
N.A.	XLOC_031741	endonuclease-reverse transcriptase	22.1057745045318	63.0635238916598	2.85280770772051	0.112420083563243	23.6295015675256	30.7708829721666	1.30222310801745	1	19.1620687661289	63.3926252565074	3.30823493173978	0.039615925334449
N.A.	XLOC_014140	gag-pol polyprotein	45.7259376866216	70.307100309059	1.53757591131104	0.580395946399911	146.39148836473	203.329624925529	1.38894431088056	0.791147806615109	36.2141395180985	115.649929256671	3.1935020628855	0.00715256521372911
N.A.	XLOC_028493	tpa_exp: reverse transcriptase	35.0712375882391	63.420683693765	1.80833891402317	0.442502807887456	21.4579671320194	40.4628682143649	1.88568040790717	0.754586680948864	38.26194028091	118.018368419117	3.08448467465724	0.0104518711521583
N.A.	XLOC_032516	reverse transcriptase	57.6506577710082	44.3607670555168	0.76947547123782	0.880267622316702	20.5870979502537	34.0249255672134	1.65273054266466	0.888911537032973	50.1841429172929	150.290728022952	2.99478519082496	0.0499852539673424
N.A.	XLOC_014232	gag-pol polyprotein	63.0836497542951	131.078492745774	2.07785207825344	0.294368705803568	21.4127321172587	60.9858443222157	2.84811130070884	0.235361594680678	60.4942293043193	177.674159232074	2.93704310767024	0.00494696043975144
N.A.	XLOC_033195	tpa: reverse transcriptase	58.5706671313625	78.2377254205493	1.33578340921194	0.691719805674261	55.4163535654693	102.269386545963	1.84547304118704	0.52070525132595	44.4941957855556	122.510803091639	2.75341088716587	0.020015579585776
N.A.	XLOC_000997	reverse transcriptase	91.8802459368682	54.5992954256313	0.594244114922667	0.561148132976901	535.058169880721	208.962711347802	0.390542044044269	0.143425888221221	71.3821653507385	189.134571622191	2.64960541184023	0.0088973201540393
N.A.	XLOC_002094	tpa_exp: reverse transcriptase	42.3715302883549	90.9175578879224	2.14572278294394	0.331518422567761	57.3531917170616	133.414416953902	2.3261899287501	0.786442791483569	41.8685453633514	109.330447885418	2.61127887144409	0.0483445499896097
Smp_174820	XLOC_031827	reverse transcriptase	134.758506726823	51.6201152765952	0.383056450612333	0.150633840868282	720.245942884575	540.357219103255	0.750239865203727	0.956742519320929	109.70926465687	287.799688126561	2.62329429539695	0.00529752447630036
N.A.	XLOC_013396	endonuclease-reverse transcriptase	82.0341104375018	51.5455289554383	0.6283426330893	0.556266232968353	47.499337937873	72.5130418958697	1.52661163384453	0.819072348683882	77.5492618301626	187.916540489703	2.42318928710439	0.0217513177072017
N.A.	XLOC_019144	endonuclease-reverse transcriptase	8.63358091922432	80.6202150003303	9.3379810480277	0.00117848395134194	1.89160313683173	10.2758147751664	5.43233121952708	0.668968740971993	8.28005626745712	48.0298963306652	5.80067269825639	0.00603366169459647
N.A.	XLOC_029261	endonuclease-reverse transcriptase	252.174393090844	0.469039283840516	0.00185997982622902	6.80323934160277e-09	29.0441779272727	45.9413428295128	1.58177459677292	0.870669064483355	271.487575430791	2470.35637279406	9.09933491016725	0.000279685010208802
N.A.	XLOC_028880	endonuclease-reverse transcriptase	14.8780389151487	39.4093220930626	2.6488250446056	0.408181399050868	3.34777168278065	13.4597148272711	4.02049963457827	0.656005739403151	11.3769324896009	57.097506721795	5.018708406153	0.00539666008550397
Smp_126430	XLOC_003104	endonuclease-reverse transcriptase	17.834259159532	65.9523459158598	3.69807040067653	0.0550724676728357	26.5672754262577	42.6314844127648	1.60466151416604	0.981166300466343	10.3308188041423	71.8512200813932	6.95503632805786	0.000171695812457992
N.A.	XLOC_010971	endonuclease-reverse transcriptase	9.62904880393264	38.002204241541	3.94662079457115	0.0923151430410554	55.4615885802299	61.2362699882395	1.10412037512514	1	10.3456276735108	54.1313904507731	5.23229640182897	0.00650276095363134
N.A.	XLOC_024456	endonuclease-reverse transcriptase	7.79193149684526	29.1865655266273	3.74574205874938	0.155628865448186	0	3.49014153982967	Inf	0.891635581605159	8.2534003025938	51.6482884339194	6.25781938841472	0.00249004717965186
N.A.	XLOC_009001	endonuclease-reverse transcriptase	7.5777462150328	26.7667827862678	3.53228810080333	0.176587417203283	7.06594469375707	14.8227292691611	2.09777034941376	0.909440057194813	8.79570867550212	51.7272499941171	5.88096444555835	0.00392781939543824

## Sheet: Sheet5_Splicing
Ref (v5.2) IDs	CuffLinks IDs	NAME (Blast-to-GO annotation)	Cercariae				Schistosomula s#2				Adults
			Expression in male (rpkm)	Expression in female (rpkm)	FoldChange	Padj	Expression in male (rpkm)	Expression in female (rpkm)	FoldChange	Padj	Expression in male (rpkm)	Expression in female (rpkm)	FoldChange	Padj
Smp_143920	XLOC_018681	integrator complex subunit 9	1336.69297057907	4720.61565268492	3.53156316116475	0.0120651601446814	1262.45764479737	1910.26869480857	1.51313487837066	0.503730397322726	1659.66820872972	2113.75519253745	1.27360106159729	0.886131770810168
Smp_035310	XLOC_003821	sfrs11 protein	6583.70790628944	22336.7024216773	3.39272378720492	0.0126624019512214	11245.7327050867	5454.94636942745	0.485068115389233	0.0592124802715199	6678.3118478297	7840.87281318758	1.17408006571836	1
Smp_141630	XLOC_001666	splicing factor 3b subunit 1	10076.8846783465	29382.0984157005	2.91579186956834	0.0333073742412254	15933.59708113	8404.80371577269	0.527489409514843	0.113716338917296	9581.29729697614	10751.3974285236	1.12212335086572	1
Smp_059360	XLOC_029827	pre-mrna-splicing factor 18-like	3243.7420753817	3111.3439781669	0.959183531200081	1	1872.89437033378	1043.884394833	0.557364265368026	0.182137254382284	3546.12756098553	1466.28023336639	0.413487729403307	0.00156348336531933
N.A.	XLOC_020022	beta-catenin-like protein 1	1408.78632460083	458.626949888524	0.325547559540992	0.0367121181486852	1606.6194011503	688.644055274724	0.428629241487855	0.456786614980174	1582.06950800576	1080.84361493923	0.683183393314787	0.4670765122315
Smp_005160	XLOC_001561	muscleblind-like protein 3	4484.86144655811	1561.56291053422	0.348185318351948	0.0346207247852438	4428.92926374287	2966.61392231103	0.669826440127869	0.498570072531398	5732.43408033219	4723.97134544584	0.824077744156472	0.953379665896322
Smp_039810	XLOC_027208	muscleblind-like protein	929.205255808176	82.5279157430508	0.0888155929243773	1.02596553155184e-05	588.215401672365	277.087178214959	0.471064133015164	0.88713002595853	1230.47157183979	435.66359877752	0.354062303224219	0.0577643027294095
Smp_164470	XLOC_022759	pre-mrna-processing factor 6	4955.70734141439	1465.26363841656	0.295671947003707	0.0167352740096787	7517.96669939353	2146.79239451999	0.285554922010119	0.000294216195256073	5907.50832507819	3311.78092818543	0.560605376403189	0.0794818070482254
Smp_019690	XLOC_031937	Splicing factor U2AF (U2 small nuclear ribonucleoprotein auxiliary factor)	11714.46375518	3188.70950807575	0.272202772121408	0.0422490757281326	27265.1374514436	4697.03329970021	0.172272496629263	1.22403836071327e-08	10137.6181244576	6210.02941142433	0.612572828763619	0.154260447137925
Smp_105860	XLOC_013050	ski interacting protein	3299.89402081679	6564.35786111477	1.98926323685085	0.195711166666618	5193.84402942933	2363.27490887368	0.455014608733513	0.0354763946854828	3093.09213861656	3605.54308474115	1.16567593953208	1
Smp_093100	XLOC_022226	splicing factor u2af 35 kda subunit isoform x2	7972.22087482851	4389.86984811218	0.550645788298811	0.659118851753707	7857.83261653692	3849.30710385602	0.489868808830962	0.0498424310341582	6811.01131186763	3814.46013909557	0.56004313668503	0.0695672249922199
Smp_016990	XLOC_027559	methylosome subunit picln	1797.70318808714	973.585929248947	0.54157212141616	0.536393448076965	5340.16747497667	1494.64737696698	0.279887734602088	0.000100484784991758	1384.4768971867	1672.55794850476	1.20807934888871	0.983049648439652
Smp_068420	XLOC_007775	small nuclear ribonucleoprotein sm d3	7111.68551635368	2456.15654788586	0.345369117101397	0.348717965841668	23766.1155689367	8105.31280911931	0.341044912687091	0.00296659512372711	5543.65616384795	6032.74250102146	1.08822450792728	1
Smp_069870	XLOC_018039	u1 small nuclear ribonucleoprotein a	2560.23052735119	1279.24873494397	0.499661542692201	0.258623548940333	7846.84801425221	2363.90528460828	0.301255393288455	0.000315514527879253	1961.8286727486	2718.83635439551	1.38586839521838	0.645428097955783
Smp_032320.6	XLOC_024342	fus-interacting serine-arginine-rich protein 1	7107.23175304691	10899.9495994281	1.53364206742734	0.441720375904077	19113.4557623439	7945.26624246732	0.415689676490662	0.0128580274417355	7223.09512375801	7313.69139738129	1.01254258348686	1
Smp_141330	XLOC_000613	u2 small nuclear ribonucleoprotein a	2531.17795682258	2062.20822690031	0.814722734662649	0.874436871189733	6491.10536621159	2647.01120289625	0.407790515414346	0.0125956658986417	2456.04755945403	2824.31321141828	1.14994239445677	1
Smp_104660	XLOC_028712	nhp2 non-histone chromosome protein 2-like 1	3044.18468273579	1240.38156159992	0.407459366258027	0.479495651015494	6633.8942077712	2937.86524457808	0.442856812690283	0.024296515467251	2700.82342874829	2287.1666504493	0.846840495422278	0.975235145349911
Smp_017890	XLOC_026292	u4 tri-snrnp-associated protein 2 isoform x2	3200.4813037795	3546.36979122109	1.10807389720825	0.922689735726957	4894.8065824441	2216.53046311531	0.452833105002596	0.0365305142208383	3036.48762967048	3505.82582683995	1.15456614826401	1
Smp_005860	XLOC_004980	heterogeneous nuclear ribonucleoprotein k	4079.03260650907	8767.98644321823	2.14952595113528	0.139320964020685	11893.970164347	3274.68134235486	0.275322814594823	8.90382069095509e-05	2462.70661415051	3160.12558436726	1.28319206445845	0.820598463719081
Smp_075560	XLOC_027457	small nuclear ribonucleoprotein sm d2	5382.34690545209	1982.91479387713	0.368410811995139	0.220427185956663	10652.8795091981	4760.46774648121	0.446871453147559	0.024296515467251	5281.25341168254	5106.78746673913	0.966965049516943	1
Smp_025130	XLOC_026507	pre-mrna-splicing factor rbm22	1993.54397241789	1753.66087187833	0.879670022904682	0.953735120869203	6500.60034942739	1869.52849921986	0.287593206585072	0.00113258829373155	2026.94600308208	2437.7488618765	1.20267084479299	0.99177847719958
Smp_021540	XLOC_021876	splicing factor 1-like	2293.85432065077	4625.48380978093	2.01646798933102	0.19512622085219	5577.636098935	2449.04543881594	0.439083044389283	0.0272025620505694	2349.11886872286	3331.8208789489	1.41832792001722	0.562519094043365
Smp_179270.3	XLOC_018928	heterogeneous nuclear ribonucleoprotein	3924.68166789037	4456.88069747193	1.13560310736428	0.890225815985729	9048.65883246511	3739.56131675903	0.41327244025845	0.015573722457586	4973.20927021405	4684.05227589094	0.941857062791437	1
Smp_011710	XLOC_025771	a1 cistron-splicing factor partial	4253.02300604456	1779.63020334475	0.418438884721638	0.12198510136633	5534.21393143498	1748.97447301625	0.316029429777167	0.000524163633145193	3738.65007090819	1837.22270002988	0.491413388571984	0.209799021990282
Smp_009400	XLOC_019799	serine arginine repetitive matrix protein 2	3488.39620943358	4157.71133228551	1.19186900875592	0.882854654146392	7960.82262369405	3020.12443485434	0.379373411218264	0.00813840371032443	3734.46683118244	3966.14571880085	1.0620380091969	1
Smp_069880	XLOC_018040	u1 small nuclear ribonucleoprotein a	4783.52673364947	1724.12716880006	0.360430131323773	0.51577214653276	7102.66970383531	3232.49745328783	0.455110203356681	0.0310289791785142	3488.08066816295	3514.21720620579	1.00749310022598	1
Smp_135740	XLOC_019477	splicing factor 3b subunit 5	5082.76907865711	2203.21835733709	0.433468120082133	0.339353716211336	11808.4511701865	5390.03701589027	0.45645588385874	0.0281170435351248	3903.62922374386	5535.50617235787	1.41804097035858	0.955653862415463
Smp_067420	XLOC_030263	splicing factor subunit 49kda	1121.92378937076	770.962435485825	0.687178971325875	0.644484527980311	4467.16831474885	1120.99238848776	0.250940262265623	3.35294408659308e-05	996.02538209992	1291.13452998185	1.29628677459981	0.833948095260758
Smp_096810	XLOC_007344	splicing factor 3b subunit 2	5622.24717423986	3547.3910015044	0.630956073535493	0.516947667965872	7875.98592549071	2843.79167582237	0.361071198288764	0.0159324298438271	6164.91069168273	5552.32596600875	0.900633641538322	1
Smp_071640	XLOC_024185	arginine serine-rich splicing factor	7702.78284949001	6323.04200283335	0.820877613504578	0.890225815985729	20792.2301217466	7219.6318284298	0.347227391489804	0.00173496520009201	6750.06772843023	8935.94003213309	1.32382968462617	0.749952099759596
Smp_043100	XLOC_016739	heterogeneous nuclear ribonucleoprotein a2 b1 homolog	8844.51440353779	10540.0298895498	1.19170249588081	0.814377968084521	31965.4057576495	10707.9405541432	0.334985284883509	0.00109040733373721	8641.42623419351	11549.1369562653	1.33648504810076	0.828515603050832
Smp_076880	XLOC_027983	splicing factor 3a subunit 2	2840.86137951335	3018.36659318198	1.06248288457462	0.984702734529216	9298.73187116591	3054.58065312205	0.328494325403003	0.00113294476934356	2526.77251475883	3671.89886206976	1.45319724693152	0.506699792444587
Smp_046980	XLOC_026073	pre-mrna-splicing factor 38a	2649.90041227615	907.873114100237	0.342606503208327	0.406725603017467	4476.1652053483	1418.07410680816	0.316805578380752	0.000390786806520339	1980.12559978958	1294.23420653672	0.653612178275082	0.295982991746904
Smp_137430	XLOC_027706	splicing factor 3b subunit 3	5678.81473708076	3719.93009804576	0.655053962890506	0.532264433690894	13254.1020043179	3571.51636266739	0.269464982350663	0.00266743583719832	6082.37668865679	3785.41601391412	0.622358036616453	0.22559894853197
Smp_152740	XLOC_004633	u3 small nucleolar rna-associated protein 4	792.288635284828	1327.91119142842	1.67604472952088	0.394296578460693	2484.81558387417	1065.30713387275	0.428726840247753	0.0286263683037341	880.086519958257	904.464762478643	1.02769982492351	1
Smp_064590	XLOC_024759	splicing factor	7604.17055567744	9157.45531223713	1.20426747995545	0.793813639049658	9757.75576797216	4347.78768158249	0.445572505089051	0.0268015089976343	6959.03081644945	5578.32047393339	0.801594449150534	0.907841919636691
N.A.	XLOC_006780	fus-interacting serine-arginine-rich protein 1	134.743415021953	140.661516029156	1.04392126328577	0.990974894298842	535.069446918536	153.357291186942	0.286611938076686	0.00132785049587754	111.893307017872	81.1951959332148	0.725648370730934	1
Smp_054600	XLOC_032401	pre-mrna-splicing factor spf27-like	2542.09094804386	841.526315221694	0.331037060601332	0.100352139199734	6458.63672571053	2594.89906802199	0.401771949441315	0.00867383042279822	2702.28715254994	2877.0089911289	1.06465702152123	1
Smp_113620.3	XLOC_009795	splicing arginine serine-rich 2	4453.79466364051	3562.88950024276	0.799967167173009	0.919318804647226	16593.7990114992	6371.95830466055	0.383996353110272	0.00477986234421906	5681.63631848134	5215.59460430331	0.917974032821834	1
Smp_098890.2	XLOC_014497	splicing arginine serine-rich 7	8416.70286117024	4596.01024020541	0.546058274364029	0.590273150574245	28384.5813130733	10663.2320183909	0.375669871638364	0.00325519084715944	9880.56744921464	8634.75671184924	0.873913037508344	1
Smp_170570	XLOC_005866	pre-mrna processing protein prp39-related	4894.46197824071	3896.34604856058	0.796072390771969	0.811404407267479	14914.0989200877	5584.53121415194	0.374446437835421	0.0301971514346762	5768.77382936907	5425.88470405896	0.940561177218554	1
Smp_036270	XLOC_001685	arginine serine-rich splicing factor	23686.9150676993	14057.0296031533	0.593451260452325	0.523772501265758	72643.0614556729	24827.6098540562	0.341775378908089	0.00137305340142519	29031.1365579653	24198.2969230337	0.83352909296947	0.974219294172571
Smp_053940	XLOC_017499	heterogeneous nuclear ribonucleoprotein a2 homolog 1	8299.06990988099	7544.5303848384	0.909081435240807	1	32462.34680243	9533.28446979863	0.293672066527396	0.000201662851813659	10073.8780947417	9900.487315034	0.982788080411829	1
Smp_091300	XLOC_034346	u1 small nuclear ribonucleoprotein c	2416.30674398428	643.392453546386	0.266271016768958	0.0786851147308486	5505.85942890344	1589.06222719709	0.2886129309541	0.00015118648233377	1835.57380067216	2032.76746068468	1.10742889222994	1
Smp_180070	XLOC_026001	gem-associated protein 5	2124.38272833565	1161.28904719803	0.546647754055052	0.283315127415915	3500.47127076252	1165.89666542601	0.333068485710509	0.0219035272750997	2366.42208274605	1240.48041237869	0.5242008268192	0.0456703560956492

## Sheet: Sheet6_ChromatinModif 
Ref (v5.2) IDs	CuffLinks IDs	NAME (Blast-to-GO annotation)	Cercariae				Schistosomula s#2				Adults
			Expression in male (rpkm)	Expression in female (rpkm)	FoldChange	Padj	Expression in male (rpkm)	Expression in female (rpkm)	FoldChange	Padj	Expression in male (rpkm)	Expression in female (rpkm)	FoldChange	Padj
Smp_002930	XLOC_013373	histone h2a-like	109.485228109717	483.868985788315	4.41949105045862	0.00308115455179345	4801.76967403279	1636.02274315871	0.340712456910639	0.0260152053849851	101.776039686657	194.333880850602	1.90942663370384	0.169219770712727
Smp_108390	XLOC_033198	histone h2b	1074.9446555431	5759.73779565944	5.35817147976743	0.000217893139476658	1479.2314046287	2965.80028132682	2.00496032740142	0.160654252630284	785.502958019367	2559.36294548354	3.25824736794999	7.98955525363515e-06
Smp_170760	XLOC_004382	bromodomain containing protein	1480.33930043106	8351.78692345906	5.64180584885309	0.000420952816528405	1174.95182699615	1661.59050296608	1.41417755586971	0.632426493160536	1609.30370136015	2255.83595651726	1.40174657810746	0.602411567626668
Smp_131320	XLOC_020714	histone acetyltransferase kat6b	125.904937698544	440.906791189841	3.50190230223941	0.0253432327114749	148.687450806703	88.366127271608	0.594307904212347	1	200.573674106118	114.57092381513	0.571216159477211	0.566793662766061
Smp_131310	XLOC_020712	histone acetyltransferase kat6b isoform x4	1092.28439626248	4042.46845357928	3.70093033225741	0.0132508094554744	923.832236982955	989.122176250706	1.07067293893204	1	1326.16048294161	1323.66394997344	0.998117472960264	1
N.A.	XLOC_004608	histone h3 type 2	1.02565129444992	49.4986778208633	48.2607276846565	4.24102234760769e-05	0	0	NA	NA	0.515652408045006	0	0	1
Smp_144180	XLOC_002973	myeloid lymphoid or mixed-lineage leukemia	1153.1083609733	3380.44487580594	2.93159341326136	0.0495622359953991	1331.33863956676	1458.89663411681	1.09581183236112	1	1558.6871394573	1877.30137862637	1.20441192533353	0.975580951969762
Smp_074610	XLOC_030332	histone -like	16.1811437245155	1086.81218144268	67.165349986731	5.62134059893977e-15	1234.04938604095	395.654847267252	0.320615083758181	0.450945870018919	12.4200844011857	74.7967530017641	6.022241925717	0.0781427128588141
Smp_160700	XLOC_015413	histone-lysine n- h3 lysine-36 and h4 lysine-20 specific	1099.97880542933	7456.2581612517	6.7785471178615	7.21031551902449e-05	1164.02072720932	1337.49908309414	1.14903373439125	1	1224.50321796392	1408.42334692974	1.15019979226485	1
N.A.	XLOC_023784	myst histone	19.9308368630443	218.174899595035	10.9466000396388	1.9492196025924e-05	2.08670292489283	5.3811696929865	2.5787905066855	1	23.2724791611204	3.58269080904495	0.153945386919941	0.0767121540484856
Smp_014400.3	XLOC_028368	enhancer of polycomb	3457.91921581987	18793.8641394754	5.43502116923209	0.000445747235284931	6110.64402596848	4710.23066035536	0.77082393285196	0.791093279183232	4073.83750200305	4278.18927315808	1.05016198389223	1
N.A.	XLOC_008961	myst histone	0.413278858754129	14.3107092823653	34.627247388135	0.048791507484526	0	1.59911338667284	Inf	1	0	1.06766698387163	Inf	1
N.A.	XLOC_000237	myst histone	0	18.0630235530895	Inf	0.00588151406218716	0	0	NA	NA	0	0	NA	NA
Smp_043580	XLOC_018546	histone-lysine n-methyltransferase setmar-like	1236.37996944001	4715.44324460025	3.81391106387465	0.00481712456470617	566.630123842677	1055.92991420671	1.86352590477503	0.711869855972657	1214.91375389027	1269.03652088963	1.04454864950377	1
N.A.	XLOC_027124	myst histone	67.8317121911534	786.373371940606	11.5930049019633	5.35953732011304e-07	29.8896103422041	46.8864841402755	1.56865491398099	0.933007102795785	48.1363421544814	32.5525045504161	0.676256298119768	0.933334491591428
N.A.	XLOC_005973	myst histone	3.27604746029144	95.6610156905852	29.2001312099658	1.50600847351648e-06	18.1950269598522	25.9742883437794	1.42754876929242	0.993969616593489	6.21152308752969	7.85335874453148	1.26432094574324	1
Smp_137970	XLOC_012774	protein jade-1	1236.86348863264	3627.06179670131	2.93246734990217	0.034776367652438	1324.23585420486	1918.0960687452	1.44845501853364	0.601504764405079	1370.79745138114	1744.65320459505	1.27272866085155	0.836854607704786
Smp_040020	XLOC_018236	histone h3	134.52922974014	38.1886700444332	0.283868941479851	0.0464563581890735	988.997814569073	632.96252831787	0.640003970679819	0.446046974419764	111.706715263829	340.451799927713	3.04772903870313	0.000644199525908938
Smp_086860	XLOC_002341	histone h2a	1044.05438307063	445.040582460828	0.426261878382173	0.645547884038743	16856.6104290671	7594.80998511994	0.450553806002639	0.0257615094991984	729.398153362209	2612.04570081529	3.58109722210687	0.0213479871816256
Smp_137390	XLOC_001590	histone rna hairpin-binding protein	164.028748587634	62.0293376459226	0.378161378295116	0.136790853223389	2563.65506218129	1066.75685417372	0.416107794652399	0.0890836570688259	194.421386496062	496.235006504529	2.55236841711639	0.00296457921101161
N.A.	XLOC_003676	ectopic virus integration site	13.5174686999199	2.85152886362154	0.210951393853676	0.337645615963856	7.13097795644411	25.5850686551341	3.58787655934533	0.415959842466643	7.75848031166471	52.5298899749656	6.77064165465343	0.00194202238839615
Smp_153560	XLOC_026202	yeats domain-containing protein 4	1414.64363823079	3575.85485990304	2.52774250932563	0.101051979252692	660.294176487737	1486.99821117878	2.25202381624578	0.0359111639985534	1728.69189081493	1873.79218397043	1.08393646891414	1
N.A.	XLOC_014212	histone deacetylase 6 10	51.4816582994379	1.95074345651895	0.0378920089398178	0.000164531977905512	6.95567641630943	5.92351012549431	0.851608063826124	1	49.0965643976026	8.00372289314768	0.163020019656172	0.00509872010410438
Smp_177250	XLOC_014211	histone deacetylase 6-like	173.944539784112	1.01266488883791	0.00582176876661243	6.88624266556244e-12	32.6718809087279	27.058969208795	0.828203594533993	1	202.692557441898	48.5242490425022	0.239398277148936	4.77439989853874e-05
N.A.	XLOC_034309	histone acetyltransferase-related	45.9853980830465	7.61650802318358	0.16562883742854	0.0272155116706919	46.4588057348805	22.414749792639	0.482465044851774	0.592721712797821	46.0648472006803	41.5487123531273	0.901961362687723	1
Smp_149110	XLOC_017296	bromodomain containing protein	1640.71644107673	351.389124744239	0.214168101170266	0.00205399451536166	648.036974680331	558.934842299511	0.862504554736597	1	1614.92613520083	2174.32282077857	1.34639149951472	0.695202477693158
Smp_144550	XLOC_002012	chromobox (chromobox 1) (heterochromatin 1)	2705.13122261776	904.489458738058	0.334360659170827	0.0283264151506871	1894.52751214243	1711.00302580414	0.90312915217011	1	3353.25427096335	3223.62025574279	0.961340833487309	1
N.A.	XLOC_029536	myst histone	46.4288603515422	0.506332444418957	0.0109055540150069	1.63777911580188e-05	7.06594469375707	11.8470202509886	1.67663642505662	1	38.7627838195865	27.0600259965522	0.698092947155126	1
Smp_211290	XLOC_020992	protein arginine n-methyltransferase 3-like	4243.35565422679	938.62171967392	0.22119798483989	0.00223943414366767	3421.70810275591	2336.23846723407	0.682769656871789	0.579345019053108	4035.68659035923	3509.12459321652	0.869523565481868	1
N.A.	XLOC_023117	myst histone	138.043843064743	7.25934822107839	0.0525872654651735	9.25914001480286e-05	8.97734607851523	6.60464458062363	0.735701233177364	1	154.885275941419	9.90973115207709	0.063981105317107	0.310295286361976
Smp_027300	XLOC_017321	histone-lysine n-methyltransferase suv39h2	1394.27048660258	429.381569844419	0.307961456525336	0.0256763745130888	3190.13783431767	1247.33832543966	0.390998254690287	0.0103726624835597	1307.3363601511	1227.20219818283	0.938704250557972	1
Smp_148930	XLOC_017787	fact complex subunit ssrp1	4471.31377267825	1425.6893718775	0.318852454638525	0.0258663201496249	6047.74083343788	2425.25691389808	0.401018658155599	0.0420298571469397	4968.72658757303	4289.19481361645	0.863238243847808	1
Smp_165220	XLOC_023151	polycomb protein EED	1920.96941598035	340.77191521512	0.177395804628784	0.000462836503541828	4831.09717340393	954.204943067906	0.197513092537442	3.42534139865947e-07	1779.98700268888	1268.16666544974	0.712458385108442	0.782190430480936
Smp_142180	XLOC_022651	poly(adp-ribose) glycohydrolase	8804.98359981553	5060.71908685089	0.574756219529689	0.412552245040293	5629.35395087392	2364.61763234128	0.420051333239437	0.014876971294056	7407.19222250572	3622.83496183201	0.489096928094364	0.0213224231975205
Smp_082240	XLOC_029414	Histone H3	40122.4811123032	8114.38225859973	0.202240291069924	0.294871804741219	96331.8416705216	17557.6569550971	0.18226223697818	3.25587225079139e-08	36124.0799507248	17913.7525341281	0.495895052789259	0.0194118853496417
Smp_199640	XLOC_034018	SWI:SNF matrix associated	3381.4359078208	1658.68410904058	0.490526555657693	0.247008451948353	7822.87655767803	1694.0946585375	0.216556486101622	1.21276899580294e-06	3143.20071841691	1582.5358063469	0.503479080121856	0.0213845263219661
Smp_210650	XLOC_029812	histone lysine N methyltransferase SETD2	5735.79440950688	3722.15059689151	0.648933753748595	0.501029950013596	10578.6951212544	1963.99336263887	0.185655540700183	1.02119145256904e-06	6573.88403349768	3048.4661780995	0.463723753349744	0.00768313777026581
Smp_134330	XLOC_007682	SWI/SNF-related matrix-associated actin-dependent regulator of chromatin subfamily D member	1363.2960513649	453.856221175742	0.332910977568924	0.0377496592932599	3238.7993766373	432.028510535702	0.133391562827907	9.8504790861714e-05	1546.19893425702	582.610614236707	0.376801846986568	0.000477699999841599
Smp_031720	XLOC_021276	histone h2a	5085.47454274593	2625.7435773176	0.516322234089842	0.521253212411452	13372.6785470465	6071.73459767964	0.454040271462344	0.0391161044818045	5933.86499787023	4860.04260124461	0.819034912824772	0.950925247789563
Smp_023530	XLOC_012229	nucleosome assembly protein	8144.37651737417	6225.53505462948	0.764396763993993	0.801863669620227	13003.5952719459	5772.65922851185	0.44392793745018	0.0272025620505694	8063.59434751004	7157.48314711637	0.887629367085725	1
Smp_210630	XLOC_020516	histone h2av	4972.65060534978	1763.08174655698	0.354555726207706	0.050512790959642	16375.889498961	6410.78248374218	0.391476901706557	0.00775143180425374	5174.10433466863	4925.30216162343	0.95191396289052	1
Smp_154640	XLOC_001724	swi snf-related	2699.67094863835	5586.78288266921	2.06943104880506	0.216970859186494	6258.84830506883	2717.91900553215	0.434252257453021	0.0271854785252528	2828.79612967147	3497.55457573561	1.23641097322266	0.908603209014908
Smp_033020	XLOC_025447	anti-silencing protein (ASF1 like histone chaperone)	3134.51223698126	667.696410878496	0.213014453413502	0.0925909341285843	8091.55487488973	2660.15109504619	0.328756479586062	0.000922997937958193	2551.95594557653	2581.27866861882	1.01149029358956	1
Smp_179650	XLOC_007519	chromobox protein homolog 1 (heterochromatin protein 1 homolog beta)	8795.69988454313	8894.63216792557	1.01124780116205	0.998738102798545	25469.077932175	11939.8442512496	0.468797664487337	0.0467002437999549	10868.926773501	10963.433816802	1.00869515870982	1
Smp_005210	XLOC_001572	histone deacetylase 1	5350.21333212318	4047.90439388784	0.756587474668319	0.785231909672581	13770.5010125993	5751.64344029965	0.417678589547119	0.0171418190717896	5820.588466687	6612.01614637922	1.13597038928655	1
Smp_068950	XLOC_022332	probable histone-binding protein caf1-like	3850.90733180071	2591.84082489843	0.673046791724916	0.61657138212613	5890.50545203415	1910.85459931619	0.324395693183906	0.000697706300346622	3606.34604156558	2222.33969273036	0.616230297125233	0.190172020002886
Smp_171710	XLOC_022066	smc2 protein	2068.11178140169	954.041201523179	0.4613102686725	0.177869409797596	4224.27136215576	1532.58106273678	0.362803648569267	0.0295933726899374	2359.74024512065	1533.24252505307	0.649750551241153	0.301878269963173
Smp_024380	XLOC_023832	arginine n-methyltransferase 2	1538.35562339915	1069.15510995872	0.694998668510931	0.713807340650784	4484.19838149925	1981.9337386956	0.441981725624048	0.0258551926376561	1396.35467321497	1829.72844779213	1.3103608151211	0.794685440289795
Smp_070760	XLOC_011611	yeats domain-containing protein	916.506203451464	416.189655379407	0.454104569954989	0.498190968424524	1469.83278368832	669.002949339621	0.455155822324809	0.0441926610441912	762.3847948537	712.510659248156	0.934581413556241	1
Smp_079000	XLOC_007060	charged multivesicular body protein 1b-2 (chromatin-modifying protein 1b-2)	9483.44349740147	4110.39834024967	0.433428884916744	0.200728260966132	10458.9884291685	4800.31456568221	0.458965472444245	0.0272025620505694	9074.58967332872	5816.26775845614	0.640940027905705	0.504014121108556
Smp_006780	XLOC_005303	n-alpha-acetyltransferase 50 isoform x2	4036.1839444921	1620.07371512334	0.401387483178052	0.158580669686407	6805.58914697659	2937.76421199776	0.43166934537958	0.0185573763414387	3187.49974088082	3042.68134550715	0.954566774228614	1
Smp_089860	XLOC_010265	histone H3.2	319.275900620957	522.254143886099	1.63574558201973	0.444372720737816	858.035998154395	323.895318964348	0.377484534053391	0.0201144049511852	234.597847715467	117.52401570728	0.50095947960196	0.398653504673924
Smp_064050.2	XLOC_016581	ruvb-like 1-like	4281.93336376533	2091.22557528371	0.488383493535916	0.241855044737222	9876.96046984251	3796.83913659628	0.384413722034145	0.00619149184847532	4539.11735285259	4449.66658048857	0.980293355423426	1
Smp_155060.2	XLOC_029007	phosphatase 2a inhibitor i2pp2a	62936.1289020496	43872.3602310251	0.697093402412876	0.704600174277198	174900.852904689	81850.1574163888	0.467980321748301	0.0359111639985534	54349.8635267364	74331.8308635729	1.36765441604111	0.667589756281408
Smp_022310	XLOC_022131	swi snf-related matrix-associated actin-dependent regulator of chromatin subfamily a containing dead h box 1-like	4103.33830564456	7266.4462660679	1.77086209442496	0.355602326413095	5583.87941901645	2382.19802606323	0.426620606804369	0.0295933726899374	4986.99860540694	4117.24792405415	0.825596365635674	0.938858797607245
Smp_076530	XLOC_030551	regulator of chromosome condensation	3081.1389191527	2588.89039251549	0.840238126370305	0.89810632872645	7633.24697829052	3173.00356389867	0.415682025345558	0.0158597736583412	3556.11390275826	3977.60822475565	1.11852666520903	1
Smp_038560.2	XLOC_026175	prothymosin alpha-b	21699.8657030259	7058.88957924585	0.325296463851458	0.239512656613546	48073.6785033154	15940.4025192195	0.331582749968263	0.00059393181908035	28588.4558758905	14163.1256449114	0.495414152705451	0.677253326180931
Smp_022570	XLOC_007664	atxn7l3-like protein	3626.29374723313	965.510404192382	0.266252673250497	0.131140748202196	2042.24510252774	1121.78084301675	0.54928805637888	0.159843875356798	3320.1761182358	1537.21246469133	0.462991242015239	0.00780927495580241
Smp_016390	XLOC_017381	charged multivesicular body protein 2a (chromatin-modifying protein 2a)	7020.79554188125	5073.04292063073	0.722573800984295	0.738801103844293	3294.14192200298	1788.50950876762	0.542936385594501	0.154331686309893	7441.28071964456	3147.28584588186	0.422949484700019	0.0274726172055761

## Sheet: Sheet7_miRNAs
CuffLinks IDs	miRNA precursor	Cercariae				Schistosomula s#2				Adults
		Expression in male (rpkm)	Expression in female (rpkm)	FoldChange	Padj	Expression in male (rpkm)	Expression in female (rpkm)	FoldChange	Padj	Expression in male (rpkm)	Expression in female (rpkm)	FoldChange	Padj
XLOC_032455	sma-mir-8483	44.5465	59.7645	1.34162	0.786107	30.4551	137.866	4.52684	0.00398758	76.1474	127.932	1.68006	0.8964
XLOC_024750	sma-mir-1a	11.6804	288.278	24.6806	8.76119e-09	88.7894	44.7179	0.503639	0.747349	2.06261	10.483	5.08242	0.523729
XLOC_021781	sma-mir-8458	115.06	1355.39	11.7799	6.26389e-06	85.2664	70.3859	0.825483	1	98.6525	176.152	1.78558	0.504014
XLOC_004797	sma-mir-125c	323.313	1680.76	5.19857	0.00115732	338.453	945.679	2.79412	0.539282	347.049	473.32	1.36384	1
XLOC_022489	sma-mir-8465	3069.91	4917.28	1.60177	0.5284	3279.55	1888.18	0.575745	0.385012	3786.04	1716.07	0.453263	0.00553887
XLOC_027304	sma-mir-8469	2494.68	1014.77	0.406774	0.0783578	998.79	1191.83	1.19328	0.966594	2816.7	1488.43	0.528433	0.0409893
XLOC_019312	sma-mir-8451	20.0545	39.0895	1.94916	0.397228	94.419	45.3718	0.480537	0.60583	8.78682	43.7592	4.9801	0.0173498
XLOC_025201	sma-mir-8459	681.832	206.139	0.302331	0.0217064	152.191	140.048	0.920217	1	868.772	309.683	0.356461	0.000293268
XLOC_009582	sma-mir-8428	231.076	32.619	0.141161	0.000372241	715.561	232.368	0.324735	0.583092	217.119	163.138	0.751378	0.882751
XLOC_007976	sma-mir-8429	8836.13	1588.51	0.179775	0.000460038	5788.39	5061.63	0.874446	1	11100.9	8376.59	0.754585	0.712137
XLOC_006836	sma-mir-125b	139.483	1.40712	0.0100881	4.96882e-07	27.6332	24.3194	0.880076	1	144.682	72.6144	0.50189	0.462948
XLOC_017143	sma-mir-8446	45673.8	2348.21	0.0514127	1.21062e-08	25273.1	7092.21	0.280623	0.000134681	44292.9	35157.1	0.793743	0.822554
